# Supplementary material for: Epigenomic profiling of glucocorticoid responses identifies cis-regulatory disruptions impacting steroid resistance in childhood acute lymphoblastic leukemia
Source: Leukemia. Author manuscript; Available in PMC 2022 Oct 4. (PMC9522591; doi:10.1038/s41375-022-01685-z)
Supplement: 1833642_Sup_Tab_1 [file NIHMS1833642-supplement-1833642_Sup_Tab_1.xlsx]

## Sheet: Supplementary Table 1
Supplementary Table 1. HGRs with variants associated with GC resistance
Gene	GC-resistance gene	lfc_6hr	FDR_6hr	lfc_24hr	FDR_24hr	Assoc_SNP	REF	ALT	Peak SNP (Assoc or LD)	Loc	Alleles	R2	LD	MAF	AssocSNP_dist	Peak_chr	Peak_start	Peak_stop	Cell	eQTL statistic.adj	eQTL p.value.adj	Drug
ABTB1	NA	1.0684	8.35e-10	1.2723	8.07e-11	rs782434	A	T	rs782439	chr3:127418950	(T/C)	0.9415	A=T,T=C	0.0536	-2161	chr3	127416505	127417180	697	2.70394	0.0077412	DEX
ABTB1	NA	0.51485	1.24e-06	1.7343	1.11e-06	rs782434	A	T	rs782439	chr3:127418950	(T/C)	0.9415	A=T,T=C	0.0536	-2161	chr3	127416545	127416939	Nalm6	2.70394	0.0077412	DEX
ARHGAP18	CRISPR Enriched	0.72925	2.86e-08	0.81684	8.34e-08	rs11154491	A	G	rs12660691	chr6:130011666	(A/C)	0.9735	A=A,G=C	0.2478	-3221	chr6	130008198	130008964	697	3.30375	0.00122372	DEX
ATG10	CRISPR Enriched	0.5091	4.84e-05	NA	NA	rs17245188	G	T	rs226198	chr5:81469082	(C/T)	0.8675	G=T,T=C	0.1396	104910	chr5	81573882	81574408	Nalm6	7.44981	1.03e-11	PRED
ATG10	CRISPR Enriched	0.5091	4.84e-05	NA	NA	rs12108833	A	G	rs111549985	chr5:81371755	(C/G)	0.8244	A=C,G=G	0.1304	-103685	chr5	81267357	81268439	Nalm6	7.63861	3.73e-12	PRED
BFSP2	TAP	0.50057	0.044584	1.6779	1.82e-05	rs6789729	A	G	rs6777995	chr3:133193312	(T/C)	0.9887	A=T,G=C	0.0298	-246	chr3	133192928	133195315	Nalm6	14.3321	7.98e-29	DEX
BFSP2	TAP	0.50057	0.044584	1.6779	1.82e-05	rs6789729	A	G	rs6789729	chr3:133193312	(A/G)	1	A=A,G=G	0.0301	0	chr3	133192928	133195315	Nalm6	14.3321	7.98e-29	DEX
BTN3A2	NA	0.71229	1.35e-11	NA	NA	rs1977	A	G	rs28362606	chr6:26377546	(T/C)	0.9646	A=T,G=C	0.0596	-11960	chr6	26365507	26365933	697	-6.68991	5.55e-10	PRED
BTN3A2	NA	0.71229	1.35e-11	NA	NA	rs1977	A	G	rs66827971	chr6:26377546	(T/C)	0.9704	A=T,G=C	0.0592	-11780	chr6	26365507	26365933	697	-6.68991	5.55e-10	PRED
BTN3A2	NA	0.71229	1.35e-11	NA	NA	rs1977	A	G	rs68112369	chr6:26377546	(T/C)	0.8906	A=T,G=C	0.0642	-11787	chr6	26365507	26365933	697	-6.68991	5.55e-10	PRED
BTN3A2	NA	0.71229	1.35e-11	NA	NA	rs1977	A	G	rs71557334	chr6:26377546	(G/T)	0.9704	A=G,G=T	0.0592	-11633	chr6	26365507	26365933	697	-6.68991	5.55e-10	PRED
BTN3A2	NA	0.75821	5.15e-12	0.68985	9.55e-06	rs1977	A	G	rs28362606	chr6:26377546	(T/C)	0.9646	A=T,G=C	0.0596	-11960	chr6	26365453	26365897	Nalm6	-6.68991	5.55e-10	PRED
BTN3A2	NA	0.75821	5.15e-12	0.68985	9.55e-06	rs1977	A	G	rs66827971	chr6:26377546	(T/C)	0.9704	A=T,G=C	0.0592	-11780	chr6	26365453	26365897	Nalm6	-6.68991	5.55e-10	PRED
BTN3A2	NA	0.75821	5.15e-12	0.68985	9.55e-06	rs1977	A	G	rs68112369	chr6:26377546	(T/C)	0.8906	A=T,G=C	0.0642	-11787	chr6	26365453	26365897	Nalm6	-6.68991	5.55e-10	PRED
COX19	NA	NA	NA	1.3927	1.09e-16	rs10235055	C	G	rs2397	chr7:1005271	(T/A)	0.9907	C=T,G=A	0.1704	-748	chr7	1002814	1006624	697	-3.52414	0.00058179	PRED
COX19	NA	NA	NA	1.3927	1.09e-16	rs10235055	C	G	rs11974179	chr7:1005271	(C/T)	0.993	C=C,G=T	0.1701	152	chr7	1002814	1006624	697	-3.52414	0.00058179	DEX
COX19	NA	NA	NA	1.3927	1.09e-16	rs10235055	C	G	rs10235055	chr7:1005271	(C/G)	1	C=C,G=G	0.1711	0	chr7	1002814	1006624	697	-3.52414	0.00058179	PRED
COX19	NA	NA	NA	1.3927	1.09e-16	rs10235055	C	G	rs11974179	chr7:1005271	(C/T)	0.993	C=C,G=T	0.1701	152	chr7	1002814	1006624	697	-3.52414	0.00058179	PRED
COX19	NA	NA	NA	1.3927	1.09e-16	rs10235055	C	G	rs28448690	chr7:1005271	(C/T)	0.9837	C=C,G=T	0.1688	679	chr7	1002814	1006624	697	-3.52414	0.00058179	PRED
COX19	NA	NA	NA	1.3927	1.09e-16	rs3735684	G	A	rs115179201	chr7:1024855	(C/T)	0.821	G=C,A=T	0.0814	-19279	chr7	1002814	1006624	697	-3.38453	0.00093553	DEX
CST3	NA	NA	NA	1.2482	5.2e-05	rs4815224	G	C	rs13037490	chr20:23594112	(T/C)	0.8337	G=T,C=C	0.1277	-10387	chr20	23583598	23584851	Nalm6	-2.62284	0.00973028	DEX
DDX17	NA	0.56335	1.08e-12	0.83544	8.97e-16	rs5750609	C	T	rs35496634	chr22:38884775	(A/C)	0.8874	C=A,T=C	0.0546	262460	chr22	39147092	39148473	697	2.62436	0.00968887	DEX
DDX17	NA	0.56335	1.08e-12	0.83544	8.97e-16	rs5750609	C	T	rs189476867	chr22:38884775	(A/T)	0.8761	C=A,T=T	0.0652	81635	chr22	38965978	38967383	697	2.62436	0.00968887	DEX
DDX17	NA	NA	NA	0.65111	3.1e-05	rs5750609	C	T	rs35496634	chr22:38884775	(A/C)	0.8874	C=A,T=C	0.0546	262460	chr22	39147058	39148655	Nalm6	2.62436	0.00968887	DEX
DDX17	NA	NA	NA	0.65111	3.1e-05	rs5750609	C	T	rs189476867	chr22:38884775	(A/T)	0.8761	C=A,T=T	0.0652	81635	chr22	38966015	38967105	Nalm6	2.62436	0.00968887	DEX
DNM3	NA	-0.76093	7.06e-06	-1.4104	9.93e-07	rs10489286	G	A	rs10489286	chr1:172312919	(G/A)	1	G=G,A=A	0.1079	0	chr1	172312404	172313046	697	-2.31196	0.0223047	PRED
ENPP2	NA	NA	NA	-1.2032	6.55e-07	rs11775668	T	C	rs11775668	chr8:120645401	(T/C)	1	T=T,C=C	0.3445	0	chr8	120645297	120646222	Nalm6	4.95172	2.17e-06	DEX
ENPP2	NA	NA	NA	-1.2032	6.55e-07	rs7839329	T	C	rs7840386	chr8:120657149	(A/C)	0.9407	T=A,C=C	0.3997	-3307	chr8	120653776	120654633	Nalm6	5.16243	8.61e-07	DEX
ENPP2	NA	NA	NA	-1.2032	6.55e-07	rs7839329	T	C	rs11778951	chr8:120657149	(A/G)	0.9238	T=A,C=G	0.4027	-11514	chr8	120645297	120646222	Nalm6	5.16243	8.61e-07	DEX
GBP3	NA	0.55603	2.57e-06	NA	NA	rs10493821	C	T	rs12127787	chr1:89475135	(T/C)	0.947	C=T,T=C	0.1741	-16374	chr1	89458058	89458937	697	-2.72863	0.00721341	PRED
GBP3	NA	0.75231	2.79e-08	1.0578	5.72e-05	rs10493821	C	T	rs12127787	chr1:89475135	(T/C)	0.947	C=T,T=C	0.1741	-16374	chr1	89458018	89458946	Nalm6	-2.72863	0.00721341	PRED
GOLGA7B	NA	-0.99756	4.97e-12	1.6649	4.84e-08	rs7923211	A	T	rs112283087	chr10:99597570	(G/A)	0.8521	A=G,T=A	0.0506	6062	chr10	99602269	99603642	Nalm6	3.28092	0.00131909	PRED
GOLGA7B	NA	-0.99756	4.97e-12	1.6649	4.84e-08	rs7923211	A	T	rs17108578	chr10:99597570	(T/C)	0.8286	A=T,T=C	0.0493	5264	chr10	99602269	99603642	Nalm6	3.28092	0.00131909	PRED
H3F3C	NA	-0.6214	0.001441	NA	NA	rs10844012	G	A	rs7979019	chr12:31939113	(T/C)	0.8079	G=T,A=C	0.1678	22480	chr12	31961464	31962880	Nalm6	-2.67196	0.00847678	DEX
KDM4C	NA	NA	NA	0.54259	4.85e-05	rs4742259	C	A	rs4742260	chr9:6755968	(T/C)	0.9482	C=T,A=C	0.4745	1063	chr9	6756672	6758501	Nalm6	2.57264	0.0111814	PRED
KDM4C	NA	NA	NA	0.54259	4.85e-05	rs4742259	C	A	rs3847264	chr9:6755968	(A/G)	0.9014	C=A,A=G	0.4639	1720	chr9	6756672	6758501	Nalm6	2.57264	0.0111814	PRED
LDLR	NA	-1.7874	2.26e-17	-2.0751	1.84e-17	rs2116898	G	A	rs11668605	chr19:11241810	(G/C)	0.9298	G=G,A=C	0.1873	7664	chr19	11249253	11249726	697	2.44078	0.0159611	PRED
LDLR	NA	-0.63207	9.59e-13	-1.204	1.44e-07	rs2116898	G	A	rs11668605	chr19:11241810	(G/C)	0.9298	G=G,A=C	0.1873	7664	chr19	11248284	11250915	Nalm6	2.44078	0.0159611	PRED
PCGF3	NA	NA	NA	0.54883	0.00017716	rs6811804	G	C	rs10471237	chr4:774617	(G/A)	0.9039	G=G,C=A	0.3286	1277	chr4	775239	776172	Nalm6	-2.43005	0.0164203	DEX
PPM1E	CRISPR Depleted	NA	NA	0.58321	0.0015753	rs304262	A	G	rs372648	chr17:56814456	(A/C)	0.9984	A=A,G=C	0.2872	-77671	chr17	56736110	56737119	Nalm6	2.24585	0.0263511	PRED
RASSF2	NA	0.61283	1.89e-11	NA	NA	rs2423034	C	T	rs2423034	chr20:4793511	(C/T)	1	C=C,T=T	0.4183	0	chr20	4793372	4795496	697	2.32984	0.021309	PRED
RASSF2	NA	-0.83044	2.79e-13	-0.52538	0.0003986	rs2423034	C	T	rs2423031	chr20:4793511	(G/A)	0.8158	C=G,T=A	0.3733	-1323	chr20	4792187	4795743	Nalm6	2.32984	0.021309	PRED
RASSF2	NA	-0.83044	2.79e-13	-0.52538	0.0003986	rs2423034	C	T	rs2423032	chr20:4793511	(A/C)	0.8323	C=A,T=C	0.3772	-1095	chr20	4792187	4795743	Nalm6	2.32984	0.021309	PRED
RASSF2	NA	-0.83044	2.79e-13	-0.52538	0.0003986	rs2423034	C	T	rs2423033	chr20:4793511	(G/T)	0.8413	C=G,T=T	0.3769	-952	chr20	4792187	4795743	Nalm6	2.32984	0.021309	PRED
RASSF2	NA	-0.83044	2.79e-13	-0.52538	0.0003986	rs2423034	C	T	rs2423034	chr20:4793511	(C/T)	1	C=C,T=T	0.4183	0	chr20	4792187	4795743	Nalm6	2.32984	0.021309	PRED
RP11-434D12.1	NA	0.61867	0.00088072	0.82168	0.0021421	rs2733577	C	A	rs2733577	chr3:14165929	(C/A)	1	C=C,A=A	0.3448	0	chr3	14165627	14166436	Nalm6	-2.37425	0.0190031	DEX
RP11-434D12.1	NA	0.61867	0.00088072	0.82168	0.0021421	rs2733577	C	A	rs2733578	chr3:14165929	(T/C)	0.8081	C=T,A=C	0.2998	465	chr3	14165627	14166436	Nalm6	-2.37425	0.0190031	DEX
SAR1A	NA	NA	NA	-0.51268	5.94e-05	rs9971030	C	T	rs10999158	chr10:71916826	(A/G)	0.8831	C=A,T=G	0.3915	-11131	chr10	71905161	71906880	Nalm6	3.8597	0.00017578	DEX
SLBP	NA	-0.87324	1.46e-15	-1.1368	3.64e-07	rs2592828	C	G	rs2854915	chr4:1729425	(A/G)	0.9972	C=A,G=G	0.3673	-7771	chr4	1721032	1723872	Nalm6	3.11974	0.00221682	PRED
SUN2	NA	0.69068	1.67e-12	0.96813	5.93e-15	rs35496634	A	C	rs35496634	chr22:39147235	(A/C)	1	A=A,C=C	0.0546	0	chr22	39147092	39148473	697	2.29049	0.0235543	PRED
TLE1	CRISPR Enriched; GE_LC50	1.1125	1.41e-15	1.9348	8.17e-09	rs7045812	C	T	rs13289712	chr9:84213227	(A/T)	0.9877	C=A,T=T	0.1224	-766	chr9	84211748	84213591	697	2.42108	0.0168134	DEX
TLE1	CRISPR Enriched; GE_LC50	1.1125	1.41e-15	1.9348	8.17e-09	rs7045812	C	T	rs7045812	chr9:84213227	(C/T)	1	C=C,T=T	0.1218	0	chr9	84211748	84213591	697	2.42108	0.0168134	DEX
TLE1	CRISPR Enriched; GE_LC50	1.1125	1.41e-15	1.9348	8.17e-09	rs7045812	C	T	rs13289712	chr9:84213227	(A/T)	0.9877	C=A,T=T	0.1224	-766	chr9	84210865	84214101	Nalm6	2.42108	0.0168134	DEX
TLE1	CRISPR Enriched; GE_LC50	1.1125	1.41e-15	1.9348	8.17e-09	rs7045812	C	T	rs7045812	chr9:84213227	(C/T)	1	C=C,T=T	0.1218	0	chr9	84210865	84214101	Nalm6	2.42108	0.0168134	DEX
TLR1	NA	0.92522	3.66e-06	NA	NA	rs12233776	A	G	rs10012016	chr4:38787507	(G/A)	0.9882	A=G,G=A	0.2124	-2877	chr4	38784418	38784763	697	2.75877	0.00661344	PRED
XRRA1	CRISPR Enriched	0.75987	1.49e-05	0.70889	8.21e-05	rs2304683	G	A	rs2119028	chr11:74563077	(G/A)	0.9875	G=G,A=A	0.2455	96856	chr11	74659898	74660343	697	11.3789	2.06e-21	DEX
XRRA1	CRISPR Enriched	0.75987	1.49e-05	0.70889	8.21e-05	rs2304683	G	A	rs2165163	chr11:74563077	(G/C)	0.9858	G=G,A=C	0.2459	97066	chr11	74659898	74660343	697	11.3789	2.06e-21	DEX
XRRA1	CRISPR Enriched	0.51181	7e-06	NA	NA	rs2304683	G	A	rs2119028	chr11:74563077	(G/A)	0.9875	G=G,A=A	0.2455	96856	chr11	74659699	74660531	Nalm6	11.3789	2.06e-21	DEX
XRRA1	CRISPR Enriched	0.51181	7e-06	NA	NA	rs2304683	G	A	rs2165162	chr11:74563077	(G/C)	0.9875	G=G,A=C	0.2455	96712	chr11	74659699	74660531	Nalm6	11.3789	2.06e-21	DEX
XRRA1	CRISPR Enriched	0.51181	7e-06	NA	NA	rs2304683	G	A	rs2165163	chr11:74563077	(G/C)	0.9858	G=G,A=C	0.2459	97066	chr11	74659699	74660531	Nalm6	11.3789	2.06e-21	DEX
