# Supplementary material for: Epigenomic profiling of glucocorticoid responses identifies cis-regulatory disruptions impacting steroid resistance in childhood acute lymphoblastic leukemia
Source: Leukemia. Author manuscript; Available in PMC 2022 Oct 4. (PMC9522591; doi:10.1038/s41375-022-01685-z)
Supplement: 1833642_Sup_Tab_2 [file NIHMS1833642-supplement-1833642_Sup_Tab_2.xlsx]

## Sheet: Supplementary Table 2
Supplementary Table 2. GC-resistance accessible chromatin sites
chr	start	stop	log2FC (R vs S)	FDR	Subtype analysis
chr1	2034733	2035352	2.25541	0.0017179	ETV6-RUNX1
chr1	2038378	2038963	2.3793	0.047878	ETV6-RUNX1
chr1	2046306	2047463	1.64668	0.0724133	ETV6-RUNX1
chr1	2068918	2069402	1.67117	0.00424613	ETV6-RUNX1
chr1	2319508	2319997	1.36072	0.0880459	ETV6-RUNX1
chr1	3646799	3647339	1.55294	0.013462	ETV6-RUNX1
chr1	3691898	3693187	0.931031	0.0643033	ETV6-RUNX1
chr1	6035194	6036254	1.18701	0.0993821	All
chr1	7022027	7023747	2.42175	0.00123887	ETV6-RUNX1
chr1	10690176	10691428	2.06014	0.0416019	ETV6-RUNX1
chr1	11901398	11902976	1.44239	0.0151295	ETV6-RUNX1
chr1	11907941	11908690	1.82652	0.0160226	ETV6-RUNX1
chr1	12065548	12066125	2.88987	7.82709e-06	ETV6-RUNX1
chr1	12384195	12385264	2.36242	0.00150241	ETV6-RUNX1
chr1	20203610	20204414	-1.20685	0.0429072	ETV6-RUNX1
chr1	20669259	20670147	1.93192	0.0234714	ETV6-RUNX1
chr1	22002558	22003444	1.99671	0.0261596	ETV6-RUNX1
chr1	23072091	23072651	1.58118	0.0351444	ETV6-RUNX1
chr1	27165279	27165991	2.87095	1.29917e-09	ETV6-RUNX1
chr1	29456430	29457096	1.51065	0.0781609	ETV6-RUNX1
chr1	31241753	31242191	1.83577	0.0351444	ETV6-RUNX1
chr1	31255135	31256449	1.04362	0.07466	ETV6-RUNX1
chr1	32999174	33000248	2.13791	0.00103237	ETV6-RUNX1
chr1	33616725	33617590	-1.28342	0.0779302	ETV6-RUNX1
chr1	41367577	41368611	-1.01097;-0.968306	0.0953934062381247;0.0109733433378205	Hyperdiploid;All
chr1	42230435	42232020	-1.03854	0.0535495	ETV6-RUNX1
chr1	44685800	44686883	2.50241	1.27234e-08	ETV6-RUNX1
chr1	44870691	44873621	1.15189	0.0138988	ETV6-RUNX1
chr1	44951205	44951920	1.80629	0.0229114	ETV6-RUNX1
chr1	51776545	51777518	-1.4102	0.0222761	ETV6-RUNX1
chr1	53875220	53876230	-1.42981	0.0875676	ETV6-RUNX1
chr1	56890111	56891095	-1.12715	0.0280384	ETV6-RUNX1
chr1	57739035	57740638	-1.37948;-1.34465	0.0713280285078321;0.0724132935770156	All;ETV6-RUNX1
chr1	57766877	57767633	-2.16833	0.0823568	ETV6-RUNX1
chr1	57784030	57785250	-1.49133	0.00752702	ETV6-RUNX1
chr1	57843288	57844743	-0.970745	0.0672997	ETV6-RUNX1
chr1	57887973	57890842	-2.05796	0.0635311	ETV6-RUNX1
chr1	58192511	58193611	-1.11109	0.081711	ETV6-RUNX1
chr1	58227145	58227685	-1.25467	0.00326242	ETV6-RUNX1
chr1	59522597	59523536	-1.00122	0.0128449	ETV6-RUNX1
chr1	64169040	64169826	-2.86946	1.12512e-08	ETV6-RUNX1
chr1	64170780	64171170	-2.33946	0.0659171	ETV6-RUNX1
chr1	64179659	64180733	-2.67077	9.25125e-07	ETV6-RUNX1
chr1	64195532	64196526	-2.04247	0.000255306	ETV6-RUNX1
chr1	64239160	64241101	-2.05198	0.000919626	ETV6-RUNX1
chr1	64387034	64388992	-1.82517	0.000809411	ETV6-RUNX1
chr1	64421119	64422112	-1.78409;-1.46903	0.086049166782827;0.0993821343534937	ETV6-RUNX1;All
chr1	67779757	67780769	-2.05719	0.0482476	ETV6-RUNX1
chr1	68362643	68364179	-1.30747	0.0487155	ETV6-RUNX1
chr1	72460327	72460813	-1.8028	0.0517277	ETV6-RUNX1
chr1	72566380	72566874	-2.27723	0.0142997	ETV6-RUNX1
chr1	75841181	75842498	3.22309	0.00504687	ETV6-RUNX1
chr1	76613474	76614780	-1.4913	0.0459741	ETV6-RUNX1
chr1	83199214	83199979	-1.765	0.0276046	ETV6-RUNX1
chr1	83261233	83261747	-2.0539	0.0163105	ETV6-RUNX1
chr1	84617948	84618812	-0.957966	0.0854851	ETV6-RUNX1
chr1	85247923	85248774	-1.31002	0.0134639	ETV6-RUNX1
chr1	85930041	85931178	1.89211	0.00915825	ETV6-RUNX1
chr1	86042185	86043140	2.36552	0.0056967	ETV6-RUNX1
chr1	89953412	89955286	-1.09671	0.0703993	ETV6-RUNX1
chr1	98519170	98520258	1.51456	0.00151539	ETV6-RUNX1
chr1	105409239	105410156	-1.86513	0.000227094	ETV6-RUNX1
chr1	105569079	105570958	-1.47694	0.0909966	ETV6-RUNX1
chr1	107260130	107260929	-1.71964	0.00326242	ETV6-RUNX1
chr1	108077756	108078659	-1.17015	0.0978779	ETV6-RUNX1
chr1	108087357	108088502	-1.61704	0.0578047	ETV6-RUNX1
chr1	108092938	108093559	-1.74301	0.0706793	ETV6-RUNX1
chr1	110211841	110212572	-1.92447	0.00011702	Hyperdiploid
chr1	112290893	112292104	-0.757198;-1.13737	0.00220448393413555;0.085030537526637	All;ETV6-RUNX1
chr1	120164653	120165744	1.9149	0.0703451	ETV6-RUNX1
chr1	120188477	120188791	-2.22267	0.0564012	Hyperdiploid
chr1	120254433	120256266	-1.79373	0.000552352	ETV6-RUNX1
chr1	146516177	146516575	2.50329	0.0852281	ETV6-RUNX1
chr1	146544089	146544923	2.41698	0.00636073	ETV6-RUNX1
chr1	146551151	146552486	1.67964	0.0868242	ETV6-RUNX1
chr1	147006095	147006838	-1.44157	0.0281216	ETV6-RUNX1
chr1	151678430	151679649	0.959187	0.0853392	ETV6-RUNX1
chr1	154469055	154470052	1.57865	0.00026713	ETV6-RUNX1
chr1	160941330	160941833	-2.16775	0.0267713	ETV6-RUNX1
chr1	162086386	162087414	-1.64214	0.0843552	ETV6-RUNX1
chr1	167013047	167013934	1.96629	0.00282534	ETV6-RUNX1
chr1	167078234	167078958	-1.33	0.0790457	ETV6-RUNX1
chr1	167760495	167761730	-1.14021	0.0982485	ETV6-RUNX1
chr1	173973889	173974631	-1.3099	0.0183976	ETV6-RUNX1
chr1	175648972	175650020	-1.91671	0.00730641	ETV6-RUNX1
chr1	176967330	176967954	-2.01958	0.00307164	ETV6-RUNX1
chr1	178568164	178569348	-1.25103	0.0297594	ETV6-RUNX1
chr1	183008968	183009994	-1.12889	0.0744063	ETV6-RUNX1
chr1	183551140	183551632	-1.05544	0.0584884	ETV6-RUNX1
chr1	183911889	183912710	-1.33708	0.0038232	ETV6-RUNX1
chr1	185633759	185635428	-2.55421	0.0823568	ETV6-RUNX1
chr1	192139192	192139843	1.61559	0.0818477	ETV6-RUNX1
chr1	192514865	192515623	-1.15422	0.0969479	ETV6-RUNX1
chr1	194644494	194645139	-2.306	0.0450796	ETV6-RUNX1
chr1	195707406	195708390	2.73907	0.000972262	ETV6-RUNX1
chr1	199190258	199191234	-1.45447	0.025765	ETV6-RUNX1
chr1	199637596	199638348	-1.55717	0.0197772	ETV6-RUNX1
chr1	201024781	201025797	-1.5014	0.0405701	ETV6-RUNX1
chr1	201109050	201110555	-1.57955	0.00417939	ETV6-RUNX1
chr1	201271089	201271932	-2.05832	0.0126014	ETV6-RUNX1
chr1	201675587	201675851	-2.35753	0.000421372	ETV6-RUNX1
chr1	201680480	201680816	-1.89746	0.095393	ETV6-RUNX1
chr1	210546755	210548298	-0.937041	0.026412	All
chr1	210780435	210781366	-1.74898	0.0161379	ETV6-RUNX1
chr1	214619755	214620808	-2.11986	0.000423751	ETV6-RUNX1
chr1	214628106	214629257	-1.42565	0.0248112	ETV6-RUNX1
chr1	214698316	214699691	-1.63285	0.00169143	ETV6-RUNX1
chr1	215716141	215716979	-1.75005	0.0450599	ETV6-RUNX1
chr1	217086632	217087563	2.29352	0.0966482	ETV6-RUNX1
chr1	217242635	217243495	-1.86386	0.0427008	ETV6-RUNX1
chr1	220943673	220944516	-2.08774	0.0137599	ETV6-RUNX1
chr1	225392925	225393767	-1.26716	0.0399523	ETV6-RUNX1
chr1	225623199	225624272	-1.31306	0.0163105	ETV6-RUNX1
chr1	226884969	226885739	-1.31616	0.0750004	ETV6-RUNX1
chr1	228928488	228929070	-1.53418	0.0424509	ETV6-RUNX1
chr1	229041826	229042379	-1.93175	0.016868	Hyperdiploid
chr1	229125386	229126634	1.15899	0.063509	ETV6-RUNX1
chr1	229506115	229506789	-1.69438	0.0128055	ETV6-RUNX1
chr1	230245617	230246145	-1.54919	0.0853392	ETV6-RUNX1
chr1	230258903	230259811	-1.62091	0.0795488	ETV6-RUNX1
chr1	231858973	231861168	-1.37042	0.0958672	ETV6-RUNX1
chr1	235160520	235161541	-1.19937	0.0229114	ETV6-RUNX1
chr1	238143789	238145084	-1.59789	0.0138852	ETV6-RUNX1
chr1	238169505	238170301	-2.73773	4.43168e-05	ETV6-RUNX1
chr1	238643242	238643523	-2.38594	0.0197287	ETV6-RUNX1
chr1	238648097	238649403	-2.15169	0.0305057	ETV6-RUNX1
chr1	238731962	238732571	-1.89242	0.0222112	ETV6-RUNX1
chr1	239894352	239895077	-1.59151	0.0923487	ETV6-RUNX1
chr1	240314331	240314807	2.76683	2.97782e-05	ETV6-RUNX1
chr1	243173790	243174345	-2.22956	0.0102671	ETV6-RUNX1
chr1	243277380	243278203	-1.22702	0.0996903	ETV6-RUNX1
chr1	243658004	243658712	-2.02389	0.00628281	ETV6-RUNX1
chr1	243890675	243891894	-1.90792	0.0162158	ETV6-RUNX1
chr1	245202672	245202976	2.04906	0.0974999	ETV6-RUNX1
chr1	245372993	245373695	-2.2763	5.45462e-05	ETV6-RUNX1
chr1	245439570	245441066	-1.12825	0.0832721	ETV6-RUNX1
chr1	245750997	245753707	-1.47564	0.0201189	ETV6-RUNX1
chr1	245843040	245844642	-1.28387	0.0276473	ETV6-RUNX1
chr1	245851160	245852151	-1.44459	0.0843552	ETV6-RUNX1
chr1	248020409	248021401	1.90738	0.00209673	ETV6-RUNX1
chr10	503764	504796	1.82243	8.64684e-07	ETV6-RUNX1
chr10	555962	556667	1.89507	0.00352221	ETV6-RUNX1
chr10	1507310	1508088	-1.1917	0.0945095	ETV6-RUNX1
chr10	2742665	2743401	-1.31691	0.00861248	ETV6-RUNX1
chr10	2967680	2968443	-1.00792	0.0985169	ETV6-RUNX1
chr10	4493025	4493987	2.03266	4.38341e-06	ETV6-RUNX1
chr10	5532788	5533721	-1.29031	0.0952595	ETV6-RUNX1
chr10	6405399	6405953	2.58597	0.0574692	ETV6-RUNX1
chr10	6417757	6418459	-1.65755	0.0722765	ETV6-RUNX1
chr10	6707794	6708293	2.33658	0.00815451	ETV6-RUNX1
chr10	8000361	8001045	1.28082	0.0367679	ETV6-RUNX1
chr10	11778922	11779889	-2.94646	0.00332772	ETV6-RUNX1
chr10	13910661	13911487	2.3074	0.000238596	ETV6-RUNX1
chr10	17037912	17038886	2.20798	0.013462	ETV6-RUNX1
chr10	18492453	18493390	3.0611	0.000113204	ETV6-RUNX1
chr10	18639382	18639828	1.53871	0.0868242	ETV6-RUNX1
chr10	18689050	18690226	1.55784	0.0298886	ETV6-RUNX1
chr10	18871071	18872901	-1.33728	0.0638908	ETV6-RUNX1
chr10	19243351	19244563	-2.05591	0.00944172	ETV6-RUNX1
chr10	19292105	19292714	-1.92532	0.0126654	ETV6-RUNX1
chr10	26978202	26978928	-1.68039	0.022013	ETV6-RUNX1
chr10	27230554	27230947	2.86192	0.0695672	ETV6-RUNX1
chr10	33529724	33530596	-1.47431	0.0613491	ETV6-RUNX1
chr10	34299700	34300186	2.28286	0.0201189	ETV6-RUNX1
chr10	34658747	34659628	-1.39431	0.0323075	ETV6-RUNX1
chr10	34663460	34664266	-1.4005	0.01179	ETV6-RUNX1
chr10	35069543	35071161	-1.0895	0.0961554	ETV6-RUNX1
chr10	35207413	35208358	-2.17598	0.083437	ETV6-RUNX1
chr10	38644671	38645755	1.27138	0.0953934	Hyperdiploid
chr10	44811605	44812889	-2.06237	0.0726304	ETV6-RUNX1
chr10	45135660	45136338	-1.96676	0.0327977	ETV6-RUNX1
chr10	45143344	45144331	-1.54274	0.0248344	ETV6-RUNX1
chr10	45390285	45391576	-0.96704	0.0733199	ETV6-RUNX1
chr10	45857615	45858467	-1.97389	0.0103373	ETV6-RUNX1
chr10	45983511	45984335	-2.95775	0.0256412	ETV6-RUNX1
chr10	46961634	46962905	-0.916418	0.0635311	ETV6-RUNX1
chr10	48426791	48428105	1.91089	0.0168636	ETV6-RUNX1
chr10	49841914	49843221	-0.949947	0.0389613	ETV6-RUNX1
chr10	53502715	53503316	-2.02346	0.0650634	ETV6-RUNX1
chr10	53594567	53595236	-2.72418	0.0126677	ETV6-RUNX1
chr10	53981789	53982062	-3.21041	1.16096e-05	ETV6-RUNX1
chr10	54225763	54226892	-1.66639	0.0163105	ETV6-RUNX1
chr10	54276554	54277315	-1.92305	0.000250253	ETV6-RUNX1
chr10	57124606	57125795	-1.07765	0.0534281	ETV6-RUNX1
chr10	57400167	57400470	-2.65369	0.0287754	ETV6-RUNX1
chr10	61448715	61449295	-1.19912;-1.46145	0.087905594303428;0.0478411952853021	ETV6-RUNX1;All
chr10	61455423	61456127	2.59109	0.00122331	ETV6-RUNX1
chr10	63525327	63525957	2.10815	0.00102045	ETV6-RUNX1
chr10	72522511	72523569	-1.27448	0.0838169	ETV6-RUNX1
chr10	73557164	73558108	3.24668	3.34981e-12	ETV6-RUNX1
chr10	73759388	73760061	1.70117	0.0364662	ETV6-RUNX1
chr10	82109581	82110693	-1.09881	0.0617606	ETV6-RUNX1
chr10	84150621	84151226	-2.10676	0.0648768	All
chr10	87777418	87779359	-1.68536	0.0510896	ETV6-RUNX1
chr10	90077978	90078825	1.96637	0.0476862	ETV6-RUNX1
chr10	90569799	90570640	1.22378	0.0960213	ETV6-RUNX1
chr10	91548855	91549974	-1.69458	0.00125679	ETV6-RUNX1
chr10	92048155	92049176	-1.43183	0.0329589	ETV6-RUNX1
chr10	95314505	95315017	2.12022	0.00982557	ETV6-RUNX1
chr10	96943068	96944307	2.33145	0.0138988	ETV6-RUNX1
chr10	98044801	98045786	-1.25303	0.0832721	ETV6-RUNX1
chr10	98176181	98177425	-1.5538	0.0477974	ETV6-RUNX1
chr10	100006592	100007375	-1.55227;-1.53929	0.0439224982938785;0.0928779914865509	All;ETV6-RUNX1
chr10	100080433	100081338	-1.17013	0.0606961	ETV6-RUNX1
chr10	101282895	101283668	-1.74875	0.00476455	ETV6-RUNX1
chr10	101289719	101291156	-1.38045	0.00378339	ETV6-RUNX1
chr10	101292318	101293254	-1.26841	0.0462995	ETV6-RUNX1
chr10	102646418	102647385	-2.63926	0.0195213	ETV6-RUNX1
chr10	104359035	104360170	1.67507	0.0346693	ETV6-RUNX1
chr10	104813421	104814288	1.71909	0.00350832	ETV6-RUNX1
chr10	112115901	112116932	1.3948	0.0664329	ETV6-RUNX1
chr10	112617169	112618260	-1.5695	0.0607462	ETV6-RUNX1
chr10	115235937	115236544	-1.37499	0.076777	ETV6-RUNX1
chr10	116273438	116274251	-2.61198	0.0790178	Hyperdiploid
chr10	117843403	117844068	2.44091	0.0443413	ETV6-RUNX1
chr10	117977712	117978494	1.66026	0.0146829	ETV6-RUNX1
chr10	118025238	118025600	2.12396	0.00851139	ETV6-RUNX1
chr10	127372845	127373740	-0.872341	0.0756816	ETV6-RUNX1
chr10	131403441	131404785	-1.49033	0.089716	ETV6-RUNX1
chr10	131516751	131517778	1.34572	0.0216786	ETV6-RUNX1
chr10	131669206	131669951	2.30405	0.00165377	ETV6-RUNX1
chr10	132098934	132100296	2.80511	0.0028846	ETV6-RUNX1
chr10	132619003	132619924	-2.70062	1.88101e-10	ETV6-RUNX1
chr10	133909685	133910369	-3.71493	0.0149727	Hyperdiploid
chr10	134549088	134550287	2.61131	0.00636488	ETV6-RUNX1
chr11	1469978	1470452	1.67775	0.0359738	ETV6-RUNX1
chr11	1750122	1751711	1.42257	0.0961299	ETV6-RUNX1
chr11	2337507	2338303	1.81882	0.0367679	ETV6-RUNX1
chr11	6490278	6490619	-1.50291	0.0206604	ETV6-RUNX1
chr11	10764136	10765615	1.31377	0.0221227	ETV6-RUNX1
chr11	11177473	11178997	-1.24515	0.0671043	ETV6-RUNX1
chr11	12311438	12312367	-1.13296	0.0603269	ETV6-RUNX1
chr11	13161511	13162460	-1.08541	0.0565725	ETV6-RUNX1
chr11	14433239	14433992	-1.50171	0.0166322	ETV6-RUNX1
chr11	14654924	14655428	-2.60331	0.00298424	ETV6-RUNX1
chr11	15132329	15132934	-1.4098	0.0809639	ETV6-RUNX1
chr11	15328898	15329833	-1.53238	0.000576357	ETV6-RUNX1
chr11	15528795	15529860	-2.32751	1.75858e-06	ETV6-RUNX1
chr11	17452545	17453460	-1.83422	0.00492151	ETV6-RUNX1
chr11	18350837	18351839	1.97858	0.000608044	ETV6-RUNX1
chr11	19042338	19043065	-2.53605	0.00135544	ETV6-RUNX1
chr11	19060006	19060601	-2.63413	4.62635e-05	ETV6-RUNX1
chr11	19390399	19391354	-1.55508	0.0533248	ETV6-RUNX1
chr11	23647161	23648990	-2.90538	0.0386885	ETV6-RUNX1
chr11	23942077	23942971	-1.75026	0.00897816	ETV6-RUNX1
chr11	24153046	24153781	-2.43601	5.2688e-05	ETV6-RUNX1
chr11	24163489	24164708	-1.34831	0.0823568	ETV6-RUNX1
chr11	24881124	24882099	-1.15107	0.0640384	ETV6-RUNX1
chr11	32410312	32410978	-1.84601	0.007525	ETV6-RUNX1
chr11	33287752	33288895	-1.29989	0.00831913	ETV6-RUNX1
chr11	45231270	45232501	-1.29308	0.00208255	ETV6-RUNX1
chr11	45233055	45233715	-1.45223	0.0151874	ETV6-RUNX1
chr11	49538114	49539506	-2.33405	8.14861e-05	ETV6-RUNX1
chr11	58414461	58415512	-1.88871	0.00800223	ETV6-RUNX1
chr11	61792646	61793595	1.55834	0.0188542	ETV6-RUNX1
chr11	61800991	61801547	1.969	0.0349277	ETV6-RUNX1
chr11	61809065	61810304	1.31324	0.0297594	ETV6-RUNX1
chr11	64598994	64599439	2.41739	0.00800223	ETV6-RUNX1
chr11	70283033	70284107	1.19053	0.0271682	ETV6-RUNX1
chr11	71748975	71749691	-1.26271	0.0619736	ETV6-RUNX1
chr11	74022288	74022927	1.72534	0.0315203	ETV6-RUNX1
chr11	74032555	74033344	-1.40989	0.00851447	ETV6-RUNX1
chr11	76902733	76903471	1.96848	0.0138852	ETV6-RUNX1
chr11	78632199	78633105	-1.71908	0.00535797	ETV6-RUNX1
chr11	78884747	78885680	-1.25529	0.0965878	ETV6-RUNX1
chr11	79053230	79054046	-1.35576	0.0846882	ETV6-RUNX1
chr11	79079003	79081299	-1.72166	0.00135544	ETV6-RUNX1
chr11	79101252	79101913	-2.32876	0.00390769	ETV6-RUNX1
chr11	86132826	86134013	-1.62956	0.00135544	ETV6-RUNX1
chr11	86158859	86159785	-1.27647	0.067193	ETV6-RUNX1
chr11	86848622	86849428	2.34653	0.0502848	ETV6-RUNX1
chr11	88839846	88840958	-1.87578	0.0120079	ETV6-RUNX1
chr11	93594916	93595592	-2.23416	0.000568947	ETV6-RUNX1
chr11	94814382	94815212	-2.49859	0.00838394	ETV6-RUNX1
chr11	102139029	102139921	1.98686	0.073911	ETV6-RUNX1
chr11	102557848	102558665	2.18284	0.0635311	ETV6-RUNX1
chr11	109939462	109940641	-1.41878	0.0847854	ETV6-RUNX1
chr11	113818615	113819233	1.64843	0.0703451	ETV6-RUNX1
chr11	122376205	122377074	1.26628	0.0533943	ETV6-RUNX1
chr11	124098449	124099353	3.42253	0.000117351	ETV6-RUNX1
chr11	124709106	124709727	1.27147	0.0201189	ETV6-RUNX1
chr11	127729559	127730321	-2.27853	1.09017e-05	ETV6-RUNX1
chr11	128433633	128434667	-1.1106	0.0659821	ETV6-RUNX1
chr11	128615274	128616030	2.15018	0.000240115	ETV6-RUNX1
chr11	130271813	130272765	-1.50195	0.0305612	ETV6-RUNX1
chr11	131617648	131618910	1.59871	0.00842404	ETV6-RUNX1
chr11	131665797	131666783	2.58793	4.91736e-06	ETV6-RUNX1
chr11	131697291	131697782	2.10628	0.0359826	ETV6-RUNX1
chr11	131780819	131781672	2.42394	0.0325915	ETV6-RUNX1
chr11	132418905	132420340	-1.96969	0.0349277	ETV6-RUNX1
chr11	132426174	132426762	-2.24142	0.0222112	ETV6-RUNX1
chr11	132449142	132451310	-2.26881	0.00355395	ETV6-RUNX1
chr12	297723	298676	1.85644	0.00794624	ETV6-RUNX1
chr12	860343	863376	0.982406	0.0484472	ETV6-RUNX1
chr12	1386801	1387522	-1.42294	0.0993821	All
chr12	2588852	2589501	2.71485	0.019415	ETV6-RUNX1
chr12	2760638	2762138	2.39945	8.49508e-10	ETV6-RUNX1
chr12	2792200	2792672	1.85161	0.033162	ETV6-RUNX1
chr12	2799930	2801445	1.20904	0.0361264	ETV6-RUNX1
chr12	2841312	2843512	1.49309	0.083437	ETV6-RUNX1
chr12	2892696	2893974	1.41676	0.0664999	ETV6-RUNX1
chr12	2903459	2905836	1.24718	0.0455821	ETV6-RUNX1
chr12	3182675	3183418	1.43421	0.0846882	ETV6-RUNX1
chr12	3206414	3207508	1.43175	0.033945	ETV6-RUNX1
chr12	3601319	3603083	1.51582	0.0822642	ETV6-RUNX1
chr12	3669185	3670042	2.12728	0.0189174	ETV6-RUNX1
chr12	4523989	4524697	1.68862	0.0333693	ETV6-RUNX1
chr12	4964642	4965064	1.49099	0.0317748	ETV6-RUNX1
chr12	6602193	6603751	1.02643	0.0349597	ETV6-RUNX1
chr12	6714831	6718192	1.02236	0.0928726	ETV6-RUNX1
chr12	6937476	6938869	1.0264	0.0996903	ETV6-RUNX1
chr12	6981465	6983229	1.24551	0.0492982	ETV6-RUNX1
chr12	6999968	7000999	1.12711	0.0722132	ETV6-RUNX1
chr12	7045826	7047569	1.03381	0.0633471	ETV6-RUNX1
chr12	7341204	7343288	1.03329	0.0830547	ETV6-RUNX1
chr12	7790851	7793650	1.80951	0.0664329	ETV6-RUNX1
chr12	8295899	8296466	2.75248	0.0114883	ETV6-RUNX1
chr12	8390120	8390481	1.51991	0.0745341	ETV6-RUNX1
chr12	12987419	12987821	3.03543	0.00818999	ETV6-RUNX1
chr12	14569499	14570190	1.78082	0.0110163	ETV6-RUNX1
chr12	14570742	14571717	1.57108	0.00918784	ETV6-RUNX1
chr12	14844417	14844940	-2.03992	0.00938867	ETV6-RUNX1
chr12	14863451	14864516	-1.60171;-2.24621	0.0955413498562415;0.00730640882733901	All;ETV6-RUNX1
chr12	15037317	15037968	-1.25098	0.0238082	ETV6-RUNX1
chr12	15073568	15074389	-1.72537	0.023767	ETV6-RUNX1
chr12	25084459	25085593	-1.72403	4.14834e-05	ETV6-RUNX1
chr12	25098703	25099009	-1.91115	0.0672997	ETV6-RUNX1
chr12	25100327	25102504	-0.988825	0.0602962	ETV6-RUNX1
chr12	25176633	25177223	-2.28829	0.0105174	ETV6-RUNX1
chr12	28127985	28129035	-1.05071	0.0725138	ETV6-RUNX1
chr12	30975327	30976717	-2.15137	0.00609583	ETV6-RUNX1
chr12	32383222	32384063	-1.12778	0.0387323	ETV6-RUNX1
chr12	32702176	32703558	1.50803	0.0256412	ETV6-RUNX1
chr12	40065902	40067366	-1.69453	0.0339769	ETV6-RUNX1
chr12	40417071	40418120	-1.35251	0.0844047	ETV6-RUNX1
chr12	40617976	40619145	-2.20392	0.0230498	ETV6-RUNX1
chr12	40620140	40620715	-2.15342	0.00138036	ETV6-RUNX1
chr12	40913803	40914658	-1.65633	0.0307466	ETV6-RUNX1
chr12	40918619	40919313	-1.90633	0.0258891	ETV6-RUNX1
chr12	45650862	45651589	-1.0631	0.080268	ETV6-RUNX1
chr12	45969305	45971480	-1.03112	0.0367679	ETV6-RUNX1
chr12	46038093	46038934	-1.13742	0.0801207	ETV6-RUNX1
chr12	51582077	51582722	1.88565	0.0140838	ETV6-RUNX1
chr12	52596403	52597410	1.40965	0.0339769	ETV6-RUNX1
chr12	56601445	56602380	1.84631	0.0668426	ETV6-RUNX1
chr12	58703443	58704062	-1.56724	0.0671043	ETV6-RUNX1
chr12	58735590	58736570	-1.49345	0.0204498	ETV6-RUNX1
chr12	67010188	67011049	-1.35708	0.0084944	ETV6-RUNX1
chr12	68946632	68947439	-0.953854	0.0955413	All
chr12	68988922	68989625	-1.37996	0.0864141	ETV6-RUNX1
chr12	69488613	69490136	-1.46406	0.0166759	ETV6-RUNX1
chr12	70436069	70436826	1.30619	0.080268	ETV6-RUNX1
chr12	71748041	71749313	-2.06787	2.01392e-05	ETV6-RUNX1
chr12	72917230	72918856	-2.22103	1.39329e-05	ETV6-RUNX1
chr12	75566204	75567248	-2.71935	3.0851e-08	ETV6-RUNX1
chr12	75831430	75832598	-1.69229	0.0196283	ETV6-RUNX1
chr12	75865695	75866636	-1.17346	0.0348188	ETV6-RUNX1
chr12	76926616	76927585	-1.67551	0.0866409	ETV6-RUNX1
chr12	77092693	77093522	-1.65059	0.0227922	ETV6-RUNX1
chr12	77097552	77098216	-2.29548	0.0200126	ETV6-RUNX1
chr12	77099770	77100361	-2.06104	0.0707018	ETV6-RUNX1
chr12	77170933	77172045	-1.36076	0.043713	ETV6-RUNX1
chr12	77266076	77266754	-1.61663	0.016485	ETV6-RUNX1
chr12	77611770	77612654	-2.00309	0.0146716	All
chr12	79264209	79265375	-1.58424	0.011524	ETV6-RUNX1
chr12	90546542	90547655	-2.60475	3.87531e-11	ETV6-RUNX1
chr12	91251555	91252479	-1.43846	0.0846882	ETV6-RUNX1
chr12	92975058	92976661	-1.68312	0.0238678	ETV6-RUNX1
chr12	93560490	93561979	-1.05101	0.0570201	ETV6-RUNX1
chr12	94190331	94191291	-1.1518	0.00705848	ETV6-RUNX1
chr12	94929030	94930300	-1.32113	0.0114866	ETV6-RUNX1
chr12	94954154	94955422	-1.5339	0.00393675	ETV6-RUNX1
chr12	94957127	94957414	-2.5723	0.000970672	ETV6-RUNX1
chr12	99959184	99959791	-1.48489	0.0904742	ETV6-RUNX1
chr12	114350333	114350948	1.4272	0.0983654	ETV6-RUNX1
chr12	114359472	114360343	1.56768	0.0520485	ETV6-RUNX1
chr12	116870883	116871487	-1.30553	0.0566394	Hyperdiploid
chr12	117298927	117299776	-1.1506	0.0637609	ETV6-RUNX1
chr12	118301273	118301723	-1.6465	0.0612263	ETV6-RUNX1
chr12	120662570	120663086	1.88775	0.00174493	ETV6-RUNX1
chr12	120860932	120862174	-1.85147	0.013462	ETV6-RUNX1
chr12	120997042	120997388	1.88425	0.057264	ETV6-RUNX1
chr12	122205100	122206010	1.66704	0.0160226	ETV6-RUNX1
chr12	122256550	122257085	1.49011	0.0745841	ETV6-RUNX1
chr12	122844033	122844513	2.68644	0.00225194	ETV6-RUNX1
chr12	124631945	124632696	-1.42378	0.0539441	ETV6-RUNX1
chr12	125012304	125013042	-1.64569	0.0610644	ETV6-RUNX1
chr12	125264231	125264831	1.66986	0.0795303	ETV6-RUNX1
chr12	131139660	131141484	-2.04531	0.000573429	ETV6-RUNX1
chr12	132337009	132337785	2.22838	1.3715e-05	ETV6-RUNX1
chr12	132933439	132934248	1.70521	0.0664329	ETV6-RUNX1
chr12	133127183	133128476	2.25966	2.14922e-05	ETV6-RUNX1
chr12	133316377	133317047	1.55466	0.0177347	ETV6-RUNX1
chr12	133318126	133318904	1.63527	0.044162	ETV6-RUNX1
chr12	133463701	133464911	1.32114	0.0189174	ETV6-RUNX1
chr13	19840866	19841995	3.27828	2.94871e-05	ETV6-RUNX1
chr13	19918844	19919894	2.73588	0.000180264	ETV6-RUNX1
chr13	22372029	22373035	-1.38873	0.0954828	ETV6-RUNX1
chr13	22522705	22524043	-2.66649	0.000366597	ETV6-RUNX1
chr13	23025436	23025929	-2.68515	0.0296772	ETV6-RUNX1
chr13	25202002	25202653	-1.95715	0.000140128	ETV6-RUNX1
chr13	26517010	26518046	-1.93579	0.000584413	ETV6-RUNX1
chr13	26593718	26594825	-1.84508	0.01351	ETV6-RUNX1
chr13	28982179	28983320	1.62198	0.095393	ETV6-RUNX1
chr13	30567930	30569121	-1.08565	0.0948454	ETV6-RUNX1
chr13	30989338	30990575	0.664795	0.0993821	All
chr13	31444371	31445091	-1.04724	0.0996903	ETV6-RUNX1
chr13	32459790	32460637	-1.69368	0.0111613	ETV6-RUNX1
chr13	32470504	32471423	-1.59878	0.0141378	ETV6-RUNX1
chr13	33778260	33779081	1.315	0.0570025	ETV6-RUNX1
chr13	34791136	34792063	-1.67294	0.0355629	ETV6-RUNX1
chr13	36204632	36205406	1.43653	0.027063	ETV6-RUNX1
chr13	36211812	36212637	1.50341	0.0635311	ETV6-RUNX1
chr13	37123578	37124355	-1.45276	0.0108675	ETV6-RUNX1
chr13	40080518	40081503	-1.31778	0.0491201	ETV6-RUNX1
chr13	40170949	40171671	-1.92206	0.0703451	ETV6-RUNX1
chr13	41026266	41027379	-1.19666	0.0264907	ETV6-RUNX1
chr13	41962784	41964316	-1.34522	0.0301314	ETV6-RUNX1
chr13	42972588	42973067	-1.67688	0.0376372	ETV6-RUNX1
chr13	44880052	44881266	-1.2783	0.0695692	ETV6-RUNX1
chr13	44990064	44991185	-1.76316	0.0497767	ETV6-RUNX1
chr13	44991768	44992270	-1.5924	0.0574692	ETV6-RUNX1
chr13	44999333	45000130	-1.1095	0.0826186	ETV6-RUNX1
chr13	45893729	45895801	-1.02405	0.046376	ETV6-RUNX1
chr13	46119934	46120586	-1.35403	0.0769284	ETV6-RUNX1
chr13	47440167	47440823	-2.25214	0.000890025	ETV6-RUNX1
chr13	47570073	47570791	-1.68434	0.0149271	ETV6-RUNX1
chr13	48037480	48038354	-1.90534	0.0002692	ETV6-RUNX1
chr13	49100560	49100957	1.93128	0.0546579	ETV6-RUNX1
chr13	53401301	53402565	-1.01512	0.0699006	ETV6-RUNX1
chr13	53543236	53544053	-1.32465	0.0179172	ETV6-RUNX1
chr13	59378632	59379564	2.0832	0.0818477	ETV6-RUNX1
chr13	59964015	59964665	-1.58019;-2.50504	0.0177255585406344;1.58632568352538e-05	All;ETV6-RUNX1
chr13	60708243	60710001	-1.2469	0.0984102	ETV6-RUNX1
chr13	62783328	62784208	-1.34777	0.0458325	ETV6-RUNX1
chr13	67191614	67192475	-1.63387	0.0248431	ETV6-RUNX1
chr13	76081271	76082484	-1.61262	0.0189179	ETV6-RUNX1
chr13	78003206	78004436	-2.47306	0.00139773	ETV6-RUNX1
chr13	78294646	78295450	-1.45304	0.0296772	ETV6-RUNX1
chr13	78341161	78341915	-1.25907	0.0296772	ETV6-RUNX1
chr13	80066418	80067192	-1.2211	0.0632326	ETV6-RUNX1
chr13	80706942	80708190	-1.69043	0.00163161	ETV6-RUNX1
chr13	80809348	80810331	-1.65771	0.0144108	ETV6-RUNX1
chr13	80881657	80882697	-1.67305	0.0028914	ETV6-RUNX1
chr13	80883758	80884548	-1.41927	0.00688088	ETV6-RUNX1
chr13	84764867	84765819	-1.57117	0.037253	ETV6-RUNX1
chr13	86115453	86116392	-1.23173	0.00730641	ETV6-RUNX1
chr13	86268093	86268926	-1.28954	0.0358671	ETV6-RUNX1
chr13	89369953	89371215	-1.36798	0.0635311	ETV6-RUNX1
chr13	89583588	89584298	-2.29465	0.0296772	ETV6-RUNX1
chr13	89584780	89586086	-1.51709	0.0713447	ETV6-RUNX1
chr13	89589531	89590814	-2.16542	0.0023004	ETV6-RUNX1
chr13	92514363	92515101	-2.04798	0.00135544	ETV6-RUNX1
chr13	94598964	94599888	-1.67986	0.00427052	ETV6-RUNX1
chr13	94680960	94681423	-2.28593	0.0218304	ETV6-RUNX1
chr13	94761073	94761893	-1.97285	0.0945095	ETV6-RUNX1
chr13	94888723	94889840	-1.19596	0.0727807	ETV6-RUNX1
chr13	98970553	98971084	-1.28368	0.073911	ETV6-RUNX1
chr13	99274409	99275940	-0.853369;-1.11216	0.0201367025498053;0.0607626753394261	All;ETV6-RUNX1
chr13	99987705	99988339	-1.52201	0.0837604	ETV6-RUNX1
chr13	101132648	101133619	-1.02287	0.050752	ETV6-RUNX1
chr13	107638572	107640283	-1.12401;-1.683	0.0955413498562415;0.00553049671692487	All;ETV6-RUNX1
chr13	111039619	111041335	-1.24575	0.0383534	ETV6-RUNX1
chr13	111695567	111696619	-0.94471	0.0781609	ETV6-RUNX1
chr13	111698894	111699504	-1.42923	0.0189731	ETV6-RUNX1
chr13	113886923	113887278	2.41887	0.0172715	ETV6-RUNX1
chr13	114940149	114940601	2.54029	0.0201189	ETV6-RUNX1
chr14	22186740	22187846	-1.42782	0.027063	ETV6-RUNX1
chr14	22944204	22945191	-2.30558	0.0520485	ETV6-RUNX1
chr14	24885962	24886420	-1.52509	0.0903266	ETV6-RUNX1
chr14	24952664	24953514	-1.33305	0.0725138	ETV6-RUNX1
chr14	34487524	34488454	2.61629	0.000821596	ETV6-RUNX1
chr14	39317481	39318097	-1.6139	0.0601735	ETV6-RUNX1
chr14	39507326	39508420	-1.82134	1.91032e-05	ETV6-RUNX1
chr14	40761733	40763316	-1.5993	0.0801407	ETV6-RUNX1
chr14	46279452	46280804	-1.311	0.0233254	ETV6-RUNX1
chr14	46956641	46957015	-1.86932	0.0502848	ETV6-RUNX1
chr14	52512461	52513012	-1.97893	0.00150241	ETV6-RUNX1
chr14	53693116	53694395	-3.79779	0.0993318	ETV6-RUNX1
chr14	53713934	53714982	-1.22064	0.0371464	ETV6-RUNX1
chr14	54560302	54561156	-2.57849	0.00784094	ETV6-RUNX1
chr14	54636032	54636629	-1.34857	0.0562722	ETV6-RUNX1
chr14	61747004	61748236	1.61012	0.0208058	ETV6-RUNX1
chr14	61810858	61811541	-1.12258	0.0801207	ETV6-RUNX1
chr14	68968407	68969698	-1.41266	0.0832721	ETV6-RUNX1
chr14	69186487	69186747	1.54828	0.0450982	ETV6-RUNX1
chr14	70721410	70722806	3.54091	0.000486932	ETV6-RUNX1
chr14	73212855	73213350	2.20402	0.00299286	ETV6-RUNX1
chr14	74213146	74213743	-1.08222	0.0357859	ETV6-RUNX1
chr14	74926264	74927103	1.5687	0.00502465	ETV6-RUNX1
chr14	76071729	76072281	1.93668	0.0416968	ETV6-RUNX1
chr14	90890639	90891071	-1.61742	0.0103167	ETV6-RUNX1
chr14	93520081	93521010	1.92879	0.00150427	ETV6-RUNX1
chr14	96468060	96468869	-1.70832	2.38879e-05	ETV6-RUNX1
chr14	100317217	100317721	3.05209	0.0064762	ETV6-RUNX1
chr14	100806296	100806648	1.79626	0.0846351	ETV6-RUNX1
chr14	104655085	104655878	1.27122	0.071948	ETV6-RUNX1
chr14	105610568	105611669	1.61071	0.00526118	ETV6-RUNX1
chr14	106765136	106766209	-2.28344	0.0315572	ETV6-RUNX1
chr14	106773863	106775392	-2.18265	0.0673309	ETV6-RUNX1
chr14	106780156	106780533	-3.3395	0.0137599	ETV6-RUNX1
chr14	106811687	106812676	-2.68675	0.00371778	ETV6-RUNX1
chr14	106995621	106996339	-2.01699	0.0405122	ETV6-RUNX1
chr14	107034460	107035464	-2.81669	0.000224994	ETV6-RUNX1
chr15	25017312	25018722	1.69044	0.0361264	ETV6-RUNX1
chr15	27895078	27896159	-1.81122	0.000241373	ETV6-RUNX1
chr15	29882848	29883527	-2.33184	0.083437	ETV6-RUNX1
chr15	31598650	31599496	-1.38971	0.0460424	ETV6-RUNX1
chr15	37175805	37176476	1.75185	0.0098857	ETV6-RUNX1
chr15	39139376	39140500	-1.58252	0.0846882	ETV6-RUNX1
chr15	39804387	39805281	-1.59389	0.0338437	ETV6-RUNX1
chr15	40214697	40215266	-1.8381	0.00638	ETV6-RUNX1
chr15	42135641	42136221	1.62039	0.0318916	ETV6-RUNX1
chr15	45122873	45123582	-0.651324	0.034284	All
chr15	45461831	45462231	-1.54014	0.0319521	ETV6-RUNX1
chr15	45664482	45665075	-1.26977	0.0932775	ETV6-RUNX1
chr15	47798358	47799430	-1.7928	0.0604761	ETV6-RUNX1
chr15	48469621	48470836	2.13339	0.0134797	ETV6-RUNX1
chr15	48542531	48543057	1.85464	0.0557896	ETV6-RUNX1
chr15	50107964	50109087	-2.04231	0.0644045	Hyperdiploid
chr15	52153151	52154419	-1.40739	0.0157998	ETV6-RUNX1
chr15	55818610	55819235	1.56444	0.0918468	ETV6-RUNX1
chr15	56034028	56035988	1.53354	0.0470914	ETV6-RUNX1
chr15	57255776	57256664	-1.55119	0.0923011	ETV6-RUNX1
chr15	58076203	58077220	-1.2248	0.0225275	ETV6-RUNX1
chr15	58982580	58983713	-1.02392	0.0973489	ETV6-RUNX1
chr15	60286146	60286654	1.75616	0.0329589	ETV6-RUNX1
chr15	66370276	66371114	2.04128	0.00734082	ETV6-RUNX1
chr15	66437471	66438521	1.13841	0.0497848	ETV6-RUNX1
chr15	69222629	69223329	2.45205	0.0173606	ETV6-RUNX1
chr15	69323781	69324334	1.95813	0.0628307	ETV6-RUNX1
chr15	70271796	70273013	2.96965	1.79781e-11	ETV6-RUNX1
chr15	70283081	70283674	2.57567	0.00492151	ETV6-RUNX1
chr15	70307036	70309041	1.43851	0.00150241	ETV6-RUNX1
chr15	74148408	74149525	-0.935422	0.0993821	All
chr15	74340443	74341195	1.05212	0.057264	ETV6-RUNX1
chr15	75499665	75499984	2.7265	4.52392e-06	ETV6-RUNX1
chr15	78231279	78232052	-1.42146	0.0681184	ETV6-RUNX1
chr15	78932903	78934020	1.14269	0.078475	ETV6-RUNX1
chr15	81114963	81116995	-1.82893	0.00214657	ETV6-RUNX1
chr15	81125153	81125598	-1.89738	0.0495304	ETV6-RUNX1
chr15	82287462	82288490	-3.10163	0.0464247	ETV6-RUNX1
chr15	83501185	83502329	-1.74382	0.000238596	ETV6-RUNX1
chr15	84113962	84115003	-1.23801	0.0590338	ETV6-RUNX1
chr15	86018148	86019393	-1.20298	0.0191882	ETV6-RUNX1
chr15	93840003	93840536	-1.87298	0.0811536	ETV6-RUNX1
chr15	95387426	95389034	2.0908	0.0664999	ETV6-RUNX1
chr15	96888889	96889306	1.98644	0.0137599	ETV6-RUNX1
chr15	99486626	99487465	1.37517	0.080268	ETV6-RUNX1
chr15	99525365	99525923	1.97956	0.00916406	ETV6-RUNX1
chr15	99707638	99709729	-1.08833	0.0839795	ETV6-RUNX1
chr15	101741497	101742136	-0.672804	0.0993821	All
chr16	892075	892774	2.77221	0.0105742	ETV6-RUNX1
chr16	1373245	1373893	2.47695	0.000294194	ETV6-RUNX1
chr16	1385301	1386196	1.3058	0.0521511	ETV6-RUNX1
chr16	1519405	1520619	1.261	0.0971119	ETV6-RUNX1
chr16	1689044	1690070	2.49496	0.014851	ETV6-RUNX1
chr16	1812079	1814227	1.41817	0.0120079	ETV6-RUNX1
chr16	2233428	2234476	2.9422	1.15637e-07	ETV6-RUNX1
chr16	2284245	2285238	2.00693	0.013462	ETV6-RUNX1
chr16	3232713	3233991	1.59406	0.0213371	ETV6-RUNX1
chr16	3398496	3399371	1.60089	0.0280384	ETV6-RUNX1
chr16	5289424	5290548	1.47006	0.0912865	ETV6-RUNX1
chr16	6799533	6800267	2.48184	0.00632898	ETV6-RUNX1
chr16	7318252	7318524	2.04214	0.0978779	ETV6-RUNX1
chr16	8735063	8736131	1.86138	0.080784	ETV6-RUNX1
chr16	10772230	10773026	-1.5794	0.00535797	ETV6-RUNX1
chr16	11443537	11444017	-1.8223	0.056616	ETV6-RUNX1
chr16	12629667	12630290	2.07007	0.0168943	ETV6-RUNX1
chr16	12994858	12997669	1.20206	0.0391982	ETV6-RUNX1
chr16	13530176	13531377	-1.44444	0.0993821	All
chr16	15528073	15529376	1.79913	0.00206549	ETV6-RUNX1
chr16	15644737	15645496	1.79619	0.0201445	ETV6-RUNX1
chr16	16288458	16289248	1.68005	0.0287848	ETV6-RUNX1
chr16	22722438	22723702	-1.45959	0.0415764	ETV6-RUNX1
chr16	24066255	24066853	2.06452	0.0651068	ETV6-RUNX1
chr16	24510467	24511614	1.26896	0.055035	ETV6-RUNX1
chr16	28923806	28924350	2.3508	0.0245706	ETV6-RUNX1
chr16	31547067	31547792	3.18278	0.00266063	ETV6-RUNX1
chr16	49372669	49373530	3.39918	2.62407e-09	ETV6-RUNX1
chr16	51185291	51187020	-1.44626	0.0538785	ETV6-RUNX1
chr16	51218660	51219607	-2.22385	0.0505464	ETV6-RUNX1
chr16	53883270	53884184	-1.30409	0.0672997	ETV6-RUNX1
chr16	65901039	65902514	-1.15473	0.0540276	ETV6-RUNX1
chr16	66209231	66210107	-1.02487	0.0872777	ETV6-RUNX1
chr16	69076902	69077382	1.90052	0.0320687	ETV6-RUNX1
chr16	69382334	69382864	1.91828	0.0267638	ETV6-RUNX1
chr16	69515179	69516608	1.05098	0.0714908	ETV6-RUNX1
chr16	70818666	70819219	3.08766	0.00970972	ETV6-RUNX1
chr16	71692543	71693452	2.51995	0.00304656	ETV6-RUNX1
chr16	74555408	74556265	-1.65324	0.0949717	ETV6-RUNX1
chr16	80837267	80838852	1.66636	0.0218503	ETV6-RUNX1
chr16	80925940	80926680	1.83715	0.0579549	ETV6-RUNX1
chr16	83065112	83065547	2.33092	0.0948167	ETV6-RUNX1
chr16	84946897	84947241	1.81311	0.0978197	ETV6-RUNX1
chr16	86609496	86611167	1.37748	0.00765664	ETV6-RUNX1
chr16	86611762	86612923	1.71468	0.000163239	ETV6-RUNX1
chr16	86767309	86767914	2.84038	0.000211857	ETV6-RUNX1
chr16	86773125	86775202	1.47786	0.00323821	ETV6-RUNX1
chr16	87655375	87656377	1.75262	0.05224	ETV6-RUNX1
chr16	87662495	87663485	1.85248	0.00208255	ETV6-RUNX1
chr16	87669019	87670439	0.89109	0.0809565	ETV6-RUNX1
chr16	88699981	88701457	1.1202	0.0876038	ETV6-RUNX1
chr16	88804990	88805412	1.62798	0.0771548	ETV6-RUNX1
chr16	89803741	89804155	1.46443	0.0795111	ETV6-RUNX1
chr17	202202	203434	1.3649	0.0187662	ETV6-RUNX1
chr17	700565	701479	2.13355	0.0837604	ETV6-RUNX1
chr17	1026143	1027468	1.12905	0.0275867	ETV6-RUNX1
chr17	2041644	2042560	1.3872	0.0846351	ETV6-RUNX1
chr17	2838753	2839652	0.631538	0.0604778	All
chr17	4348134	4348798	1.98924	0.0679763	ETV6-RUNX1
chr17	4400541	4400903	1.18593	0.0954516	ETV6-RUNX1
chr17	5000483	5001208	2.05457	0.0227922	ETV6-RUNX1
chr17	10025359	10026022	-1.3235	0.0297322	ETV6-RUNX1
chr17	14508027	14508962	-1.20583	0.0707909	ETV6-RUNX1
chr17	16301818	16302410	1.83876	0.0187662	ETV6-RUNX1
chr17	16873298	16874065	-1.55232	0.00244659	ETV6-RUNX1
chr17	18585383	18586176	4.53099	1.26997e-11	ETV6-RUNX1
chr17	22007014	22007625	2.31472	0.0466942	ETV6-RUNX1
chr17	25728099	25729088	-1.97661	0.0266137	ETV6-RUNX1
chr17	27411625	27412954	2.46781	0.0144108	ETV6-RUNX1
chr17	27418144	27419433	2.59249	5.41178e-05	ETV6-RUNX1
chr17	33167577	33168396	-2.30415	0.0703454	ETV6-RUNX1
chr17	37064446	37065421	1.60436	0.0799478	ETV6-RUNX1
chr17	40340520	40341927	1.39933	0.0823568	ETV6-RUNX1
chr17	43535475	43535739	-1.8856	0.00574861	ETV6-RUNX1
chr17	46058801	46059347	2.28784	0.00355541	ETV6-RUNX1
chr17	47112846	47113650	2.04198	0.00493809	ETV6-RUNX1
chr17	48849376	48850185	2.33379	0.0483852	ETV6-RUNX1
chr17	54755632	54756926	-1.19788	0.00884808	ETV6-RUNX1
chr17	54814639	54815288	-2.22583	0.00494589	ETV6-RUNX1
chr17	54827245	54828062	-1.28708	0.0911346	ETV6-RUNX1
chr17	54969075	54969732	1.66343	0.055518	ETV6-RUNX1
chr17	63770766	63771520	-1.75815	0.0180845	ETV6-RUNX1
chr17	64490069	64490737	-2.40284	0.0197551	ETV6-RUNX1
chr17	66254646	66255938	0.70546	0.0993821	All
chr17	68100493	68101594	-2.35672	0.000749595	ETV6-RUNX1
chr17	71006795	71007739	1.35909	0.0634887	ETV6-RUNX1
chr17	71064500	71064852	1.81202	0.00882829	ETV6-RUNX1
chr17	73240154	73241100	2.0386	0.0691117	ETV6-RUNX1
chr17	74768711	74769513	-1.59141	0.0598956	ETV6-RUNX1
chr17	74815843	74816757	-1.14021	0.0266824	ETV6-RUNX1
chr17	76268045	76269194	1.14832	0.046133	ETV6-RUNX1
chr17	76408621	76409825	1.4188	0.0121722	ETV6-RUNX1
chr17	78579001	78579864	1.64635	0.0664381	ETV6-RUNX1
chr17	78586930	78587823	1.97647	0.0405701	ETV6-RUNX1
chr17	78863912	78866941	-1.03266	0.0993821	All
chr17	79109349	79110298	1.07173	0.0611035	ETV6-RUNX1
chr17	79232054	79233555	2.218	0.028285	ETV6-RUNX1
chr18	452819	453427	-1.07632	0.083437	ETV6-RUNX1
chr18	1651896	1652835	-1.42424	0.0533943	ETV6-RUNX1
chr18	1755521	1756672	0.995653	0.0741958	Hyperdiploid
chr18	2046278	2046946	-1.30782	0.0266824	ETV6-RUNX1
chr18	3639004	3639913	3.31561	1.09336e-05	ETV6-RUNX1
chr18	8051883	8052729	-2.42469	0.0176502	ETV6-RUNX1
chr18	11565352	11567057	-1.54019	0.063485	ETV6-RUNX1
chr18	19393107	19393722	-1.68001	0.049058	ETV6-RUNX1
chr18	21718475	21719351	-1.08782	0.0884103	ETV6-RUNX1
chr18	23713514	23714420	2.55411	0.0228433	ETV6-RUNX1
chr18	28506105	28507189	-1.10097	0.0950792	ETV6-RUNX1
chr18	30448163	30448862	1.95076	0.0512988	ETV6-RUNX1
chr18	31382861	31383372	-2.43141	9.41118e-05	ETV6-RUNX1
chr18	31389177	31390212	-2.30963	5.83265e-05	ETV6-RUNX1
chr18	31421294	31421838	-1.78551	0.0197287	ETV6-RUNX1
chr18	31429679	31430176	-3.5991	1.9571e-06	ETV6-RUNX1
chr18	31431457	31432082	-3.34398	1.39006e-07	ETV6-RUNX1
chr18	31434187	31435146	-3.02678	1.24379e-06	ETV6-RUNX1
chr18	31451161	31451862	-2.85353	6.04911e-08	ETV6-RUNX1
chr18	31452571	31453768	-2.70402	9.75123e-07	ETV6-RUNX1
chr18	31497985	31498889	-2.55755	3.47854e-07	ETV6-RUNX1
chr18	31801953	31803220	-2.49252	0.049812	ETV6-RUNX1
chr18	34151818	34152876	0.813945;1.36215	0.0649588802516163;0.0969478748248354	All;ETV6-RUNX1
chr18	35004686	35005798	-1.11013	0.0280036	ETV6-RUNX1
chr18	35008533	35009015	-1.61202	0.0484472	ETV6-RUNX1
chr18	42182471	42183577	-1.44461	0.0969479	ETV6-RUNX1
chr18	42503655	42504686	-1.7852	0.00150327	ETV6-RUNX1
chr18	42596057	42597315	-1.99585	0.000803592	ETV6-RUNX1
chr18	43035874	43036761	-1.97536	0.000776881	ETV6-RUNX1
chr18	43386469	43387587	-1.04373	0.0882087	ETV6-RUNX1
chr18	46043066	46043940	-1.98773	0.00195541	ETV6-RUNX1
chr18	47720494	47721854	2.19515	0.0675548	ETV6-RUNX1
chr18	48817110	48818048	2.69172	1.12606e-07	ETV6-RUNX1
chr18	54034725	54035679	-2.18687	0.0116195	ETV6-RUNX1
chr18	54126164	54127003	-1.38937	0.063703	ETV6-RUNX1
chr18	54423721	54424591	-1.3213	0.0686544	ETV6-RUNX1
chr18	54629660	54629961	2.01657	0.0953934	Hyperdiploid
chr18	56563418	56564361	-1.93019	0.00159649	ETV6-RUNX1
chr18	57290710	57292191	-2.11327	0.00266063	ETV6-RUNX1
chr18	57502946	57503563	-2.33452	0.00476455	ETV6-RUNX1
chr18	57548971	57549944	-0.849694	0.0924823	ETV6-RUNX1
chr18	60104408	60105346	-1.23307	0.0743305	ETV6-RUNX1
chr18	60811952	60812197	-2.0938	0.032047	ETV6-RUNX1
chr18	60844493	60846069	-1.54965	0.0482476	ETV6-RUNX1
chr18	63336821	63337463	-2.66694	0.00064825	ETV6-RUNX1
chr18	65241916	65244030	-1.27701	0.0193141	ETV6-RUNX1
chr18	66039989	66040495	-2.14793	0.0183665	ETV6-RUNX1
chr18	66198893	66200183	-1.4263	0.0105654	ETV6-RUNX1
chr18	70902690	70903051	-2.76529	0.00509885	ETV6-RUNX1
chr18	71515950	71516864	-1.48218	0.083437	ETV6-RUNX1
chr18	71526962	71529440	-1.14445	0.0492982	ETV6-RUNX1
chr18	71621143	71622503	-1.10989	0.0569665	ETV6-RUNX1
chr18	71629378	71629918	-1.7761	0.0361418	ETV6-RUNX1
chr18	72097987	72099195	-1.59109	0.021434	ETV6-RUNX1
chr18	72173704	72174256	2.27143	0.0244434	ETV6-RUNX1
chr18	73259960	73261310	-1.42583	0.011504	ETV6-RUNX1
chr18	73263182	73263718	-1.60445	0.0200126	ETV6-RUNX1
chr18	73545229	73546135	-1.72216	0.0282816	ETV6-RUNX1
chr18	73628050	73628615	1.60947	0.0468135	ETV6-RUNX1
chr18	74091758	74093187	1.80257	0.0043297	ETV6-RUNX1
chr18	76401828	76402248	-1.53405	0.0349191	ETV6-RUNX1
chr18	76402753	76403299	-2.06545	0.0199325	ETV6-RUNX1
chr18	77509273	77510239	2.51607	0.000404733	ETV6-RUNX1
chr18	77615145	77615538	-1.69599	0.0921905	ETV6-RUNX1
chr19	669112	669666	1.80717	0.0270139	ETV6-RUNX1
chr19	2076647	2077020	2.42407	0.00449627	ETV6-RUNX1
chr19	2215193	2216261	2.91678	6.45227e-07	ETV6-RUNX1
chr19	2324297	2325985	1.454	0.00347704	ETV6-RUNX1
chr19	2490872	2491755	1.5503	0.027042	ETV6-RUNX1
chr19	2710252	2711766	0.870001	0.0841788	ETV6-RUNX1
chr19	3537197	3538073	1.36942	0.0659821	ETV6-RUNX1
chr19	3713145	3713773	2.01841	0.000129929	ETV6-RUNX1
chr19	3854264	3854616	2.71235	0.0459741	ETV6-RUNX1
chr19	3857589	3858157	1.71541	0.0574692	ETV6-RUNX1
chr19	4759624	4760199	1.57888	0.0550405	ETV6-RUNX1
chr19	6042007	6042485	2.63599	0.00203404	ETV6-RUNX1
chr19	9517778	9518959	1.28923	0.0974578	ETV6-RUNX1
chr19	9592806	9593423	1.73656	0.0809426	ETV6-RUNX1
chr19	9785298	9786206	0.741224	0.0993821	All
chr19	9819632	9820442	1.59508	0.0936606	ETV6-RUNX1
chr19	11735398	11736134	1.34502	0.0699006	ETV6-RUNX1
chr19	11784467	11785347	1.89412	0.0349597	ETV6-RUNX1
chr19	14460142	14460568	1.61781	0.0788413	ETV6-RUNX1
chr19	14511731	14512189	1.35914	0.00881213	ETV6-RUNX1
chr19	15580142	15581014	-1.13578	0.038894	ETV6-RUNX1
chr19	15661805	15662589	-1.19218	0.0838554	ETV6-RUNX1
chr19	17267592	17268096	1.83317	0.0795303	ETV6-RUNX1
chr19	24335647	24336622	2.41143	0.0875428	ETV6-RUNX1
chr19	28794309	28795078	-1.398	0.013462	ETV6-RUNX1
chr19	30111632	30112149	2.00219	0.013212	ETV6-RUNX1
chr19	30112641	30113559	2.07856	0.0403495	ETV6-RUNX1
chr19	31545440	31545975	1.46185	0.062049	ETV6-RUNX1
chr19	31694486	31695014	2.38671	0.00417939	ETV6-RUNX1
chr19	31704419	31705562	1.96914	0.0345964	ETV6-RUNX1
chr19	31711286	31712015	1.67818	0.0222112	ETV6-RUNX1
chr19	31839540	31842497	1.07653	0.0151874	ETV6-RUNX1
chr19	31847888	31848349	2.03154	0.0199042	ETV6-RUNX1
chr19	34252863	34253436	2.21787	0.0557368	ETV6-RUNX1
chr19	36020292	36020880	2.03416	0.0898362	ETV6-RUNX1
chr19	36258024	36259245	0.889801	0.0432282	ETV6-RUNX1
chr19	36294221	36295565	1.22016	0.0205406	ETV6-RUNX1
chr19	36302551	36303823	1.6041	0.000146669	ETV6-RUNX1
chr19	36612272	36613174	2.45928	0.045601	ETV6-RUNX1
chr19	36837690	36838232	3.66528	0.0642009	ETV6-RUNX1
chr19	36979879	36981453	0.890167	0.0958672	ETV6-RUNX1
chr19	36983503	36984263	1.98333	0.0307065	ETV6-RUNX1
chr19	37718548	37719183	2.18728	0.0361264	ETV6-RUNX1
chr19	39332995	39334223	0.874842	0.0795111	ETV6-RUNX1
chr19	43695835	43696278	1.67848	0.0954828	ETV6-RUNX1
chr19	44084427	44084955	-1.95664	0.0013412	ETV6-RUNX1
chr19	47295197	47295705	1.32113	0.033467	ETV6-RUNX1
chr19	48000186	48000945	2.12658	0.000499141	ETV6-RUNX1
chr19	49412655	49413137	2.0479	0.0289495	ETV6-RUNX1
chr19	49421346	49422443	1.15139	0.0438197	ETV6-RUNX1
chr19	50860414	50862193	1.28681	0.0301314	ETV6-RUNX1
chr19	51661456	51662270	1.91412	0.062703	ETV6-RUNX1
chr19	51697473	51698395	2.684	0.000287215	ETV6-RUNX1
chr19	51728310	51729501	1.49844	0.0930971	ETV6-RUNX1
chr19	51761117	51762109	1.84652	0.021346	ETV6-RUNX1
chr19	54714620	54715145	1.41802	0.0309585	ETV6-RUNX1
chr19	55470091	55471688	1.27268	0.062049	ETV6-RUNX1
chr19	55932578	55933743	1.1696	0.0276473	ETV6-RUNX1
chr19	58951255	58952101	1.87414	0.00233952	ETV6-RUNX1
chr19	59074096	59074659	1.12132	0.0301568	ETV6-RUNX1
chr2	554520	555069	2.02224	0.0652838	ETV6-RUNX1
chr2	696289	697129	-1.3821	0.00455522	ETV6-RUNX1
chr2	3418073	3419050	2.37276	0.000114945	ETV6-RUNX1
chr2	3611128	3612032	1.06699	0.095737	ETV6-RUNX1
chr2	3656803	3658154	1.48437	0.0420621	ETV6-RUNX1
chr2	4151820	4153909	-1.4185	0.0648768	All
chr2	4319942	4320544	1.42863	0.0610644	ETV6-RUNX1
chr2	4608386	4609261	-1.76739	0.078475	ETV6-RUNX1
chr2	4740615	4741234	-1.73637	0.0528329	ETV6-RUNX1
chr2	5849171	5849704	-1.53826	0.032047	ETV6-RUNX1
chr2	6034457	6035593	-1.8264	0.028285	ETV6-RUNX1
chr2	6104822	6105459	-1.69877	0.0574225	ETV6-RUNX1
chr2	8142489	8144580	-1.29483	0.0921905	ETV6-RUNX1
chr2	8422318	8423572	1.81797	0.013686	ETV6-RUNX1
chr2	9331277	9332550	-0.771831;-1.08455	0.0955413498562415;0.0985168794424903	All;ETV6-RUNX1
chr2	10565829	10566192	2.28043	0.00486166	ETV6-RUNX1
chr2	10567235	10567752	2.41672	0.000240193	ETV6-RUNX1
chr2	12427022	12428266	-1.57869;-2.4659	0.0955413498562415;0.0333952831080676	All;Hyperdiploid
chr2	15122039	15123470	1.68589	0.00425757	ETV6-RUNX1
chr2	15178066	15179305	2.58273	0.00246357	ETV6-RUNX1
chr2	16894109	16894777	-2.14446	0.00130679	ETV6-RUNX1
chr2	18340878	18341796	-1.82035	0.015908	ETV6-RUNX1
chr2	19157111	19158069	-1.31227	0.0390252	ETV6-RUNX1
chr2	21330727	21331082	1.59826	0.0201189	ETV6-RUNX1
chr2	21970419	21971598	-3.12236;-2.49133;-1.78032	0.0371263333433763;0.00220448393413555;0.0114866142705143	Hyperdiploid;All;ETV6-RUNX1
chr2	21982127	21983294	-1.2226	0.0993821	All
chr2	21997311	21998421	-2.03413	0.0235948	ETV6-RUNX1
chr2	22041074	22041472	-1.88923	0.073166	ETV6-RUNX1
chr2	22067015	22067727	-2.00377	0.00403799	ETV6-RUNX1
chr2	23520625	23521250	-2.18677	0.0359857	ETV6-RUNX1
chr2	27454614	27455279	3.10251	0.000870467	ETV6-RUNX1
chr2	29223266	29224141	-1.34501	0.0192197	ETV6-RUNX1
chr2	31375969	31376600	-1.89248	0.0244434	ETV6-RUNX1
chr2	31436729	31437596	-1.11387	0.096736	ETV6-RUNX1
chr2	32650640	32651148	-1.90706	0.0333693	ETV6-RUNX1
chr2	36757468	36758578	-1.72078	0.00627553	ETV6-RUNX1
chr2	36916135	36916646	1.96335	0.0745341	ETV6-RUNX1
chr2	38724404	38725809	-1.54296	0.00813153	ETV6-RUNX1
chr2	40709295	40710169	-1.16602	0.0938534	ETV6-RUNX1
chr2	42106140	42107194	-1.65415	0.000310343	ETV6-RUNX1
chr2	42199718	42200832	-1.25163	0.083437	ETV6-RUNX1
chr2	43155629	43157514	-0.731252	0.0604778	All
chr2	45464320	45465744	-1.06848	0.0834742	ETV6-RUNX1
chr2	45949927	45950673	-1.56783	0.028285	ETV6-RUNX1
chr2	46791876	46792623	-2.32991	0.000573429	ETV6-RUNX1
chr2	48642122	48643535	-0.613554	0.0993821	All
chr2	49087512	49087921	-2.03263	0.0250274	ETV6-RUNX1
chr2	49167517	49168724	-1.55289	0.00043817	ETV6-RUNX1
chr2	58077143	58078194	-1.27332	0.0909966	ETV6-RUNX1
chr2	64220525	64221993	-1.03998	0.013557	All
chr2	70623810	70624889	2.18876	0.00244949	ETV6-RUNX1
chr2	72168771	72169843	-1.70787	0.0195457	ETV6-RUNX1
chr2	72352891	72354104	-1.70042	0.00025848	ETV6-RUNX1
chr2	73307352	73307831	-1.34943	0.0122345	ETV6-RUNX1
chr2	75060750	75063764	-1.15991	0.0266025	ETV6-RUNX1
chr2	75071040	75071748	-2.09389	1.32776e-05	ETV6-RUNX1
chr2	75076289	75077178	-1.43992	0.023513	ETV6-RUNX1
chr2	76599363	76600398	-1.68128	0.0437612	ETV6-RUNX1
chr2	79318564	79319877	-1.94058	0.0193447	ETV6-RUNX1
chr2	79739567	79740222	1.89891	0.0557853	ETV6-RUNX1
chr2	84427828	84428794	-1.46373	0.0862184	ETV6-RUNX1
chr2	85173076	85174187	-1.14807	0.0703451	ETV6-RUNX1
chr2	85777445	85778122	1.3009	0.0836002	ETV6-RUNX1
chr2	99402771	99404439	-1.1922	0.0703451	ETV6-RUNX1
chr2	105504895	105506222	-1.15288	0.08527	ETV6-RUNX1
chr2	105925201	105926308	1.97215	0.0795111	ETV6-RUNX1
chr2	105979425	105980120	1.94285	0.00464192	ETV6-RUNX1
chr2	108729849	108730677	-1.59221	0.0234151	ETV6-RUNX1
chr2	109790276	109791281	-1.72173	0.046309	ETV6-RUNX1
chr2	115417257	115418196	1.89851	8.14022e-05	ETV6-RUNX1
chr2	120188621	120190179	-1.019	0.0438192	ETV6-RUNX1
chr2	120206458	120207351	-1.69953	0.0319216	ETV6-RUNX1
chr2	120211701	120212020	-2.16846	0.0116195	ETV6-RUNX1
chr2	120212520	120213444	-2.17011	0.000135757	ETV6-RUNX1
chr2	121026630	121027192	2.68858	0.0134639	ETV6-RUNX1
chr2	122913223	122914494	-1.08624	0.013462	ETV6-RUNX1
chr2	128272951	128273749	-1.54579	0.0421822	ETV6-RUNX1
chr2	128335502	128336015	-1.48029	0.0881857	ETV6-RUNX1
chr2	129046889	129047433	-0.862057;-1.40998	0.0993821343534937;0.000446976508073967	All;ETV6-RUNX1
chr2	129062793	129063672	-1.63823	0.0800575	ETV6-RUNX1
chr2	129230467	129232419	0.986944	0.0969479	ETV6-RUNX1
chr2	131484839	131486180	1.80351	0.044091	ETV6-RUNX1
chr2	132398897	132399604	-1.37639	0.0270845	ETV6-RUNX1
chr2	133403189	133403948	-1.79063	0.0750214	ETV6-RUNX1
chr2	134322171	134322772	-1.90168	0.0055305	ETV6-RUNX1
chr2	134325603	134326537	-2.00654	0.00131792	ETV6-RUNX1
chr2	134347385	134349252	-1.55599	0.00663038	ETV6-RUNX1
chr2	135044959	135045370	-1.2937	0.0892627	ETV6-RUNX1
chr2	140038115	140039724	-1.96546	0.00109711	ETV6-RUNX1
chr2	143452759	143453538	-1.45399	0.0978197	ETV6-RUNX1
chr2	145427049	145428004	-1.4062	0.0403199	ETV6-RUNX1
chr2	145439942	145441834	-1.44405	0.0920184	ETV6-RUNX1
chr2	151486989	151487883	-2.15432	0.0962176	All
chr2	152171648	152172836	-1.46729	0.00562166	ETV6-RUNX1
chr2	152493549	152495300	-0.930006	0.0875676	ETV6-RUNX1
chr2	152622222	152623295	-1.38295	0.00963137	ETV6-RUNX1
chr2	153393226	153394419	-1.60364	9.93755e-05	ETV6-RUNX1
chr2	158898676	158900083	-1.58551;-1.11733	0.0101153782829001;0.0595539629837775	ETV6-RUNX1;All
chr2	160003497	160004188	1.26594	0.0823568	ETV6-RUNX1
chr2	160609793	160610737	1.84488	0.0177175	ETV6-RUNX1
chr2	164410162	164410621	-1.56002	0.0524197	ETV6-RUNX1
chr2	165367121	165367809	-2.04773	0.00455219	ETV6-RUNX1
chr2	165370653	165371865	-1.98343	0.00156442	ETV6-RUNX1
chr2	167862443	167863680	-1.38826	0.0862184	ETV6-RUNX1
chr2	169568257	169569429	-1.00804;-1.32469	0.0310497022539785;0.0562721747315781	All;ETV6-RUNX1
chr2	171139256	171140376	-1.29225	0.00794962	ETV6-RUNX1
chr2	173172298	173173545	1.56846	4.17394e-05	ETV6-RUNX1
chr2	174418983	174419606	-1.66146	0.0408097	ETV6-RUNX1
chr2	174437184	174438133	-1.61943	0.0513123	ETV6-RUNX1
chr2	174449306	174450006	-2.07388	0.000192765	ETV6-RUNX1
chr2	176341751	176342155	-2.53119	0.0120782	ETV6-RUNX1
chr2	177004966	177005778	2.38775	5.53623e-05	ETV6-RUNX1
chr2	177380698	177381647	1.97089	0.0448791	ETV6-RUNX1
chr2	177864044	177864548	-1.8498	0.0280746	ETV6-RUNX1
chr2	178212397	178213696	-1.9719	0.0141509	ETV6-RUNX1
chr2	178499158	178500172	-2.26966	0.000146669	ETV6-RUNX1
chr2	182884997	182885894	-1.87812	0.00195541	ETV6-RUNX1
chr2	183696590	183698187	-1.30483	0.0201189	ETV6-RUNX1
chr2	183730804	183732369	-1.34297	0.0357968	ETV6-RUNX1
chr2	188364653	188365141	1.50147	0.0371464	ETV6-RUNX1
chr2	188369426	188370372	2.47334	0.000578362	ETV6-RUNX1
chr2	188374514	188375820	3.28518	3.43088e-11	ETV6-RUNX1
chr2	188411909	188412476	2.47762	0.00114226	ETV6-RUNX1
chr2	188418765	188419987	2.33162	2.07594e-06	ETV6-RUNX1
chr2	188445294	188446523	2.08877	0.00132205	ETV6-RUNX1
chr2	190739375	190740246	-2.18793	0.00754909	ETV6-RUNX1
chr2	193780093	193780676	-2.0852	0.0696684	ETV6-RUNX1
chr2	194117394	194118348	-1.15256	0.0276473	ETV6-RUNX1
chr2	194122688	194123753	-1.25242	0.0282876	ETV6-RUNX1
chr2	196511230	196512224	-1.64638	0.00115054	ETV6-RUNX1
chr2	197097445	197099284	-1.15687	0.0635311	ETV6-RUNX1
chr2	199781219	199781532	-2.15079	0.0069763	ETV6-RUNX1
chr2	206619843	206621519	-1.33226	0.0310346	ETV6-RUNX1
chr2	208824741	208825414	2.61499	0.00785211	ETV6-RUNX1
chr2	210413319	210414955	-1.26502	0.0390464	ETV6-RUNX1
chr2	216847992	216848814	-1.13657	0.0385516	ETV6-RUNX1
chr2	217786682	217787733	-1.46231	0.0107557	ETV6-RUNX1
chr2	217950714	217951347	-1.37773	0.0619736	ETV6-RUNX1
chr2	217954784	217955595	-1.23025	0.0113334	ETV6-RUNX1
chr2	221200061	221200735	-1.63342	0.0520485	ETV6-RUNX1
chr2	223906196	223906581	-1.76211	0.0177347	ETV6-RUNX1
chr2	223966446	223967560	-1.21172	0.0765827	ETV6-RUNX1
chr2	228269140	228269916	-1.66395	0.0046044	ETV6-RUNX1
chr2	229858716	229859599	-2.42641	8.9428e-05	ETV6-RUNX1
chr2	235485577	235486508	-2.12896	0.0299449	ETV6-RUNX1
chr2	236443171	236443885	-1.45458	0.0745295	ETV6-RUNX1
chr2	239039479	239040484	2.33114	0.00135544	ETV6-RUNX1
chr2	240040232	240040916	1.59155	0.0371464	ETV6-RUNX1
chr2	240168041	240168745	2.37159	0.00393675	ETV6-RUNX1
chr2	240220123	240220550	2.13644	5.62077e-05	ETV6-RUNX1
chr2	240230366	240231680	1.67067	0.000345927	ETV6-RUNX1
chr2	242918480	242919095	1.87925	0.0806361	ETV6-RUNX1
chr20	3632466	3634222	1.68364	0.00835291	ETV6-RUNX1
chr20	4306027	4307595	-2.1243	0.000238596	ETV6-RUNX1
chr20	8365607	8366445	-1.74316	0.00921144	ETV6-RUNX1
chr20	8834326	8835441	1.27046	0.0806629	ETV6-RUNX1
chr20	9033383	9034223	2.29433	0.0173606	ETV6-RUNX1
chr20	10040621	10041650	-2.34383	0.00579818	ETV6-RUNX1
chr20	11037003	11037500	-1.62967	0.0171441	ETV6-RUNX1
chr20	11432543	11433998	-1.52174	0.0266824	ETV6-RUNX1
chr20	12478692	12479061	-2.05039	0.0151874	ETV6-RUNX1
chr20	12630054	12631198	-2.04609	0.0207483	ETV6-RUNX1
chr20	12655485	12656365	-1.73968	0.0090606	ETV6-RUNX1
chr20	13279854	13280561	-2.89845	2.50086e-07	ETV6-RUNX1
chr20	15774857	15775638	-1.4181	0.0307466	ETV6-RUNX1
chr20	15875938	15876942	1.79928	0.0150196	ETV6-RUNX1
chr20	16378650	16380046	-1.32312	0.071948	ETV6-RUNX1
chr20	16534866	16535948	-1.25086	0.0370209	ETV6-RUNX1
chr20	18708722	18709700	-1.67361	0.0337675	ETV6-RUNX1
chr20	21544508	21545387	-1.60122	0.085704	ETV6-RUNX1
chr20	22212425	22214012	-2.90093	7.52473e-05	ETV6-RUNX1
chr20	23855145	23856198	-1.91842	0.00297296	ETV6-RUNX1
chr20	24487848	24488629	1.26908	0.033467	ETV6-RUNX1
chr20	25477326	25478128	2.1678	5.83265e-05	ETV6-RUNX1
chr20	30873325	30874067	1.49395	0.033467	ETV6-RUNX1
chr20	31097356	31098602	1.39255	0.0650071	ETV6-RUNX1
chr20	32366097	32367309	-1.0699	0.0522137	ETV6-RUNX1
chr20	33713443	33713926	2.8496	0.0600345	ETV6-RUNX1
chr20	34098911	34099879	1.51274	0.0274228	ETV6-RUNX1
chr20	36597127	36597713	-2.03363	0.0199325	ETV6-RUNX1
chr20	40097400	40098717	-1.11227	0.0618901	ETV6-RUNX1
chr20	41159636	41160716	1.50978	0.0785451	ETV6-RUNX1
chr20	42074923	42075656	1.29066	0.0761217	ETV6-RUNX1
chr20	42543193	42544206	1.21493	0.0931429	ETV6-RUNX1
chr20	43214427	43215511	-1.93896	0.00144057	ETV6-RUNX1
chr20	43243841	43244942	-1.06614	0.0210193	ETV6-RUNX1
chr20	45849733	45850446	-2.02791	0.0036036	ETV6-RUNX1
chr20	46537988	46539045	-2.16932	0.0285335	Hyperdiploid
chr20	47845320	47845710	2.4118	0.0136816	ETV6-RUNX1
chr20	48001018	48002435	1.22308	0.0578047	ETV6-RUNX1
chr20	49269206	49269818	-1.73	0.0646323	ETV6-RUNX1
chr20	50383486	50385560	1.21845	0.000776881	ETV6-RUNX1
chr20	50575265	50575998	2.61544	0.00111611	ETV6-RUNX1
chr20	50594639	50595119	1.84328	0.0240014	ETV6-RUNX1
chr20	60471028	60471910	1.16464	0.0579624	ETV6-RUNX1
chr20	60849384	60850533	1.41335	0.0884103	ETV6-RUNX1
chr20	61869589	61870425	1.32882	0.00214657	ETV6-RUNX1
chr20	62245701	62246463	1.55422	0.00592537	ETV6-RUNX1
chr20	62556387	62557401	3.50526	1.9571e-06	ETV6-RUNX1
chr20	62580048	62581356	0.827021	0.0788151	ETV6-RUNX1
chr20	62634527	62635858	2.33436	0.0235748	ETV6-RUNX1
chr20	62787545	62788013	1.63003	0.0630973	ETV6-RUNX1
chr20	62824346	62825067	1.55482	0.0911346	ETV6-RUNX1
chr21	15351943	15353143	3.09358	0.0146829	ETV6-RUNX1
chr21	16212963	16213991	-1.67519	0.00559764	ETV6-RUNX1
chr21	20250003	20250854	1.59351	0.0269371	ETV6-RUNX1
chr21	21630571	21631527	2.25525	0.00123887	ETV6-RUNX1
chr21	22618023	22618792	-1.10081	0.0405701	ETV6-RUNX1
chr21	26781954	26783026	-1.41045	0.0149172	ETV6-RUNX1
chr21	27203695	27204867	-1.47637	0.0641622	ETV6-RUNX1
chr21	27342555	27343090	-2.21556	0.0182849	ETV6-RUNX1
chr21	29391448	29391950	2.06595	0.05224	ETV6-RUNX1
chr21	35392151	35393083	-1.45204	0.00353349	ETV6-RUNX1
chr21	37640088	37640672	1.74021	0.00784766	ETV6-RUNX1
chr21	42225792	42226831	-1.22113;-1.42343	0.0993821343534937;0.086049166782827	All;ETV6-RUNX1
chr21	42333618	42334298	-1.87906	0.063485	ETV6-RUNX1
chr21	44275944	44276404	2.23925	0.0110163	ETV6-RUNX1
chr21	44707036	44707340	-2.30691	0.00334204	ETV6-RUNX1
chr21	46686236	46687064	1.49555	0.00815451	ETV6-RUNX1
chr21	46721619	46722723	2.07181	0.0699006	ETV6-RUNX1
chr21	47357558	47358602	2.86577	0.0052785	ETV6-RUNX1
chr21	48005310	48006059	-1.90898	0.0999609	ETV6-RUNX1
chr22	17915065	17916360	-1.02684	0.0832721	ETV6-RUNX1
chr22	17956245	17956955	-1.60855	0.0703752	ETV6-RUNX1
chr22	17977132	17977809	-2.3495	0.000515588	ETV6-RUNX1
chr22	18570374	18571545	3.30498	4.55342e-17	ETV6-RUNX1
chr22	19861660	19862495	1.83576	0.0302891	ETV6-RUNX1
chr22	19949673	19950466	1.2832	0.0998016	ETV6-RUNX1
chr22	20043408	20044636	1.09025	0.0818477	ETV6-RUNX1
chr22	20280424	20280698	2.00199	0.0683909	ETV6-RUNX1
chr22	22516178	22516918	-2.07367	0.000790981	ETV6-RUNX1
chr22	24201274	24201727	2.10944	0.0290111	ETV6-RUNX1
chr22	24700996	24701865	3.51812	9.59936e-08	ETV6-RUNX1
chr22	25227644	25228113	1.99248	0.0135883	ETV6-RUNX1
chr22	25675921	25676520	-2.45833	0.028006	ETV6-RUNX1
chr22	26137807	26139369	-2.16229	0.000642031	Hyperdiploid
chr22	26144239	26146914	-2.07244	1.9625e-05	Hyperdiploid
chr22	29992998	29993749	2.4285	0.0127552	ETV6-RUNX1
chr22	31955202	31955726	2.53648	0.00180282	ETV6-RUNX1
chr22	35971395	35972115	-1.58098	0.049058	ETV6-RUNX1
chr22	38014173	38014728	2.42712	0.00163158	ETV6-RUNX1
chr22	39764315	39765320	-1.29189	0.00916406	ETV6-RUNX1
chr22	40711313	40711694	-1.50667	0.0713125	ETV6-RUNX1
chr22	43695243	43695487	-3.33635	0.0221411	ETV6-RUNX1
chr22	45998734	45999846	-1.64212	0.000633565	ETV6-RUNX1
chr22	50578002	50578658	2.36525	0.000516003	ETV6-RUNX1
chr22	50657024	50658043	1.27118	0.0367876	ETV6-RUNX1
chr22	51167442	51168325	1.79858	0.00838394	ETV6-RUNX1
chr3	276115	276829	1.87705	0.0523107	Hyperdiploid
chr3	339272	339788	-1.51247	0.0806361	ETV6-RUNX1
chr3	350209	351323	-2.04908	0.0351444	ETV6-RUNX1
chr3	3447096	3447645	-2.49805	0.0080739	ETV6-RUNX1
chr3	4468226	4469064	-2.35915	1.11151e-06	ETV6-RUNX1
chr3	4862266	4863326	-1.37043	0.0668426	ETV6-RUNX1
chr3	5061204	5061632	-1.78121	0.0118591	ETV6-RUNX1
chr3	5218110	5218588	-1.91822	0.0228433	ETV6-RUNX1
chr3	8810814	8811647	1.77495	0.0818477	ETV6-RUNX1
chr3	8996410	8997374	-1.05861	0.0868242	ETV6-RUNX1
chr3	9210007	9210568	1.82567	0.0349597	ETV6-RUNX1
chr3	9734490	9734988	1.99221	0.0167511	ETV6-RUNX1
chr3	9762832	9763637	-1.42739	0.0265846	ETV6-RUNX1
chr3	10468013	10468803	-1.60927	0.0542125	ETV6-RUNX1
chr3	11643101	11643883	-1.13751	0.0373158	ETV6-RUNX1
chr3	14290108	14291694	-1.39622	0.0984102	ETV6-RUNX1
chr3	16472271	16473185	-1.64414	0.0218766	ETV6-RUNX1
chr3	18570961	18571530	-1.8902	0.01981	ETV6-RUNX1
chr3	19294959	19296368	-1.1116	0.0502743	ETV6-RUNX1
chr3	19853220	19853632	2.46245	0.000503785	ETV6-RUNX1
chr3	25438067	25438968	-1.19669	0.0641325	ETV6-RUNX1
chr3	31503319	31504609	0.955238	0.0823568	ETV6-RUNX1
chr3	33067182	33067651	2.8083	0.00295953	ETV6-RUNX1
chr3	33260010	33260651	1.39318	0.0635311	ETV6-RUNX1
chr3	34377027	34377603	-1.81504	0.0318638	ETV6-RUNX1
chr3	35546464	35547319	-1.26272	0.0140838	ETV6-RUNX1
chr3	36421423	36422600	2.07044	0.0557688	ETV6-RUNX1
chr3	36718695	36719326	-2.49033	0.0341722	ETV6-RUNX1
chr3	36932693	36933786	-0.971297	0.080784	ETV6-RUNX1
chr3	37516042	37517161	-1.33501	0.0652669	ETV6-RUNX1
chr3	37575112	37575507	-2.1056	0.0166334	ETV6-RUNX1
chr3	40002152	40002945	2.57795	2.88762e-08	ETV6-RUNX1
chr3	45208672	45209381	1.16694	0.0619736	ETV6-RUNX1
chr3	47017769	47018546	0.887558	0.0957672	ETV6-RUNX1
chr3	48698846	48699506	1.07725	0.0846882	ETV6-RUNX1
chr3	49169881	49171386	1.13892	0.0465016	ETV6-RUNX1
chr3	58992753	58993440	-1.78305	0.056616	ETV6-RUNX1
chr3	59241803	59242493	-2.43764	4.31071e-05	ETV6-RUNX1
chr3	59763276	59763857	-1.44334	0.0644045	Hyperdiploid
chr3	59908851	59910628	-0.976252	0.0993821	All
chr3	62400631	62401823	-2.29705	0.00720209	ETV6-RUNX1
chr3	66462076	66463075	-1.48518	0.0197287	ETV6-RUNX1
chr3	66479119	66479667	-1.49328	0.0369387	ETV6-RUNX1
chr3	67667670	67668401	-1.67435	0.0359826	ETV6-RUNX1
chr3	67966693	67967388	-1.67937	0.0725138	ETV6-RUNX1
chr3	72126495	72127333	-0.986816	0.091455	ETV6-RUNX1
chr3	73426190	73427679	-1.35732	0.0539822	ETV6-RUNX1
chr3	75444274	75446054	-2.76249	0.0338158	ETV6-RUNX1
chr3	75628293	75629820	1.30162	0.0011257	ETV6-RUNX1
chr3	75670909	75671318	2.19973	0.0244434	ETV6-RUNX1
chr3	76401072	76402442	-2.64119	0.0487155	ETV6-RUNX1
chr3	76432433	76433638	-2.67579	0.0173606	ETV6-RUNX1
chr3	78611100	78612011	-1.40561	0.0509425	ETV6-RUNX1
chr3	93733448	93734391	-1.79855	0.00676166	ETV6-RUNX1
chr3	98331214	98332583	-3.32531	4.43197e-06	ETV6-RUNX1
chr3	106122435	106123376	-2.00063	0.00512778	ETV6-RUNX1
chr3	108751790	108753234	-1.26372	0.0810106	ETV6-RUNX1
chr3	108790233	108791956	-0.895665	0.0837604	ETV6-RUNX1
chr3	111545954	111547058	-2.12385	0.0120174	ETV6-RUNX1
chr3	114973324	114974215	-1.46644	0.0522137	ETV6-RUNX1
chr3	116773925	116774815	-1.36456	0.0339133	ETV6-RUNX1
chr3	116962195	116963301	-2.41922	0.000270047	ETV6-RUNX1
chr3	116983388	116984389	-1.8773	0.00756443	ETV6-RUNX1
chr3	117020626	117021525	-1.57687	0.0157165	ETV6-RUNX1
chr3	122592568	122593330	1.8223	0.0351444	ETV6-RUNX1
chr3	122818120	122819204	1.58166	0.0351444	ETV6-RUNX1
chr3	126025659	126026208	-1.72034	0.0998016	ETV6-RUNX1
chr3	126673504	126674738	2.05572	0.00406941	ETV6-RUNX1
chr3	127023002	127023888	1.79729;1.50948	0.0885047183410222;0.0478411952853021	Hyperdiploid;All
chr3	127202769	127203592	2.02643	0.00597356	ETV6-RUNX1
chr3	128201580	128203107	1.15464	0.00597356	ETV6-RUNX1
chr3	130568870	130569875	2.39786	0.00290255	ETV6-RUNX1
chr3	132036007	132036588	-1.97634	0.0530908	ETV6-RUNX1
chr3	133661134	133662793	2.27157	8.7563e-07	ETV6-RUNX1
chr3	134622851	134623972	2.28759	0.0117729	ETV6-RUNX1
chr3	134637030	134637748	2.05746	0.0911346	ETV6-RUNX1
chr3	137846478	137847282	-1.69157	0.0507222	ETV6-RUNX1
chr3	138115159	138116086	-1.15668	0.0485107	ETV6-RUNX1
chr3	138296800	138298570	-1.00089	0.0690626	ETV6-RUNX1
chr3	141928527	141930501	-1.71801	0.00186439	ETV6-RUNX1
chr3	141971061	141971847	-2.24415	0.00200174	ETV6-RUNX1
chr3	143133446	143134263	-1.66645	0.0339769	ETV6-RUNX1
chr3	143488217	143489116	-1.4522	0.0947659	ETV6-RUNX1
chr3	143988757	143989627	-1.42709	0.00109711	ETV6-RUNX1
chr3	144803708	144804970	-1.16264	0.00842431	ETV6-RUNX1
chr3	146876694	146877282	-1.9431	0.056616	ETV6-RUNX1
chr3	148860359	148861166	-1.3394;-0.903375	0.0818477246229613;0.00927727674790778	ETV6-RUNX1;All
chr3	150461731	150462454	-1.68245	0.00357533	ETV6-RUNX1
chr3	150464868	150466670	-1.57133	0.0522137	ETV6-RUNX1
chr3	151063704	151064556	-1.935	0.0934326	ETV6-RUNX1
chr3	151194010	151194891	-2.04632	0.000332826	ETV6-RUNX1
chr3	152233700	152234619	-1.74887	0.00344598	ETV6-RUNX1
chr3	155052378	155053501	1.55503	0.0150629	ETV6-RUNX1
chr3	156114884	156115878	-1.32367	0.0719272	ETV6-RUNX1
chr3	156142450	156144017	-1.29009	0.0276046	ETV6-RUNX1
chr3	156888469	156889304	-1.18135	0.00266063	ETV6-RUNX1
chr3	157328643	157329403	-1.22321	0.0883329	ETV6-RUNX1
chr3	158832163	158833305	-2.39435	0.0369984	ETV6-RUNX1
chr3	160822407	160823426	1.52113	0.00150241	ETV6-RUNX1
chr3	161381821	161382455	-2.53672	0.00376626	ETV6-RUNX1
chr3	161382740	161383339	-2.48264	0.00166022	ETV6-RUNX1
chr3	161388429	161389607	-2.69924	0.00125679	ETV6-RUNX1
chr3	161393085	161393482	-2.5856	0.00269176	ETV6-RUNX1
chr3	161566136	161567143	-1.25342	0.0213482	ETV6-RUNX1
chr3	161852149	161852891	-2.25346	0.0498711	ETV6-RUNX1
chr3	162044831	162046009	-1.86194	0.0371471	All
chr3	162242708	162244520	-2.7203	0.0333953	Hyperdiploid
chr3	162316023	162317418	-1.70315	0.090724	All
chr3	162358388	162359881	-1.62432	0.0993821	All
chr3	169049503	169050630	-1.72778	0.0407149	ETV6-RUNX1
chr3	169588776	169589633	-1.40529	0.0938534	ETV6-RUNX1
chr3	171407554	171408849	-1.97195	0.0371457	ETV6-RUNX1
chr3	171505888	171507080	-1.42355	0.0301698	ETV6-RUNX1
chr3	172276592	172277517	-2.05776	0.00539737	ETV6-RUNX1
chr3	172594243	172595613	-1.20926	0.0201523	ETV6-RUNX1
chr3	181101327	181102170	-2.02777	0.00476455	ETV6-RUNX1
chr3	182966769	182967448	-0.973002	0.0662844	ETV6-RUNX1
chr3	184382006	184382608	-1.45091	0.0443016	ETV6-RUNX1
chr3	188692404	188693823	-1.02805	0.0788559	ETV6-RUNX1
chr3	189348279	189349365	-1.51652	0.0736897	ETV6-RUNX1
chr3	190164445	190164967	1.98711	0.0937819	ETV6-RUNX1
chr3	192634692	192636250	1.08324	0.0494935	ETV6-RUNX1
chr3	193559533	193560801	-1.00321	0.0743773	ETV6-RUNX1
chr3	194836295	194837130	2.22868	0.000114945	ETV6-RUNX1
chr3	194838493	194839328	1.51033	0.0867095	ETV6-RUNX1
chr3	194971656	194972463	1.47386	0.0146829	ETV6-RUNX1
chr4	323511	324184	1.55323	0.0159523	ETV6-RUNX1
chr4	1042770	1043804	1.63205	0.0510896	ETV6-RUNX1
chr4	2513373	2513961	2.79739	0.000188368	ETV6-RUNX1
chr4	3681247	3681980	2.76172	2.34092e-07	ETV6-RUNX1
chr4	4408258	4409110	1.91718	0.00195541	ETV6-RUNX1
chr4	6260427	6260985	1.57955	0.0244487	ETV6-RUNX1
chr4	6261689	6262587	1.28561	0.0244487	ETV6-RUNX1
chr4	6290210	6290875	1.86105	0.026864	ETV6-RUNX1
chr4	8042682	8043469	-2.04079	0.00351819	ETV6-RUNX1
chr4	8046069	8047130	-2.67286	4.59186e-08	ETV6-RUNX1
chr4	8055869	8056431	-1.90995	0.0219767	ETV6-RUNX1
chr4	10965857	10966760	-1.41027	0.0928726	ETV6-RUNX1
chr4	15548952	15549589	-1.54916	0.046133	ETV6-RUNX1
chr4	15834260	15834945	-1.76196	0.0590551	ETV6-RUNX1
chr4	16899009	16900723	-1.16553	0.093762	ETV6-RUNX1
chr4	17490584	17492107	1.36529	0.0750214	ETV6-RUNX1
chr4	18146398	18147626	-1.80236	0.0421822	ETV6-RUNX1
chr4	19600091	19600850	-1.49598	0.0126654	ETV6-RUNX1
chr4	22608927	22609622	-1.09958	0.0170929	ETV6-RUNX1
chr4	22671066	22672432	-1.43652	0.0841186	ETV6-RUNX1
chr4	22856453	22857316	-1.79174	0.0450935	ETV6-RUNX1
chr4	24842603	24843739	-2.43511	0.0852691	ETV6-RUNX1
chr4	24975218	24976311	-2.33325	0.0618901	ETV6-RUNX1
chr4	24976585	24977446	-1.49863	0.0703451	ETV6-RUNX1
chr4	25971619	25972765	-1.55089	0.00744725	ETV6-RUNX1
chr4	26089664	26090999	-0.886302	0.0478412	All
chr4	26127528	26128572	-1.85775	0.0449925	ETV6-RUNX1
chr4	26205422	26206581	-1.85259	0.00488096	ETV6-RUNX1
chr4	26781929	26782964	-1.5083	0.0126366	ETV6-RUNX1
chr4	27041907	27042817	-1.56259	0.0438192	ETV6-RUNX1
chr4	31317562	31318216	-1.86606	0.0412377	ETV6-RUNX1
chr4	36509766	36510940	-1.32635	0.0619736	ETV6-RUNX1
chr4	38073509	38074409	-1.5319	0.0913842	ETV6-RUNX1
chr4	38086737	38087479	-1.74224	0.0137599	ETV6-RUNX1
chr4	38753733	38755135	-1.93571	1.42252e-05	ETV6-RUNX1
chr4	38787414	38788169	-1.78337	0.0268826	ETV6-RUNX1
chr4	41648475	41649985	-2.55836	0.00742056	ETV6-RUNX1
chr4	42031170	42032434	-1.77417	0.0173898	ETV6-RUNX1
chr4	42152744	42154911	-2.37055	6.93008e-06	ETV6-RUNX1
chr4	42634765	42635305	-1.34557	0.00266063	ETV6-RUNX1
chr4	42718767	42719641	-3.07489	6.28788e-07	ETV6-RUNX1
chr4	46977156	46978805	-1.85923	0.00206058	ETV6-RUNX1
chr4	46981103	46982109	-2.47201	0.0301278	ETV6-RUNX1
chr4	46989053	46989942	-1.55756	0.0333693	ETV6-RUNX1
chr4	46994467	46994767	-2.91639	0.0118591	ETV6-RUNX1
chr4	46995064	46997020	-2.27299	0.00174943	ETV6-RUNX1
chr4	53905057	53906458	-0.867607	0.0955413	All
chr4	60684205	60685016	2.05252	0.0162933	ETV6-RUNX1
chr4	68342744	68343469	-2.40883	0.00209673	ETV6-RUNX1
chr4	70261194	70262238	-1.94999	0.0152426	ETV6-RUNX1
chr4	74464778	74465358	-1.55761	0.0201189	ETV6-RUNX1
chr4	74469240	74470246	-1.32826	0.0359456	ETV6-RUNX1
chr4	75961311	75961757	-2.17955	0.0157408	ETV6-RUNX1
chr4	76105637	76106930	-2.03489	0.0318638	ETV6-RUNX1
chr4	76924184	76925281	-1.36083	0.00210907	All
chr4	77099462	77100064	-1.69785	0.0069763	ETV6-RUNX1
chr4	77226055	77228419	-1.45975	0.0846882	ETV6-RUNX1
chr4	78285456	78285982	-2.71426	0.0227116	ETV6-RUNX1
chr4	78534338	78535090	-1.64992	0.0256412	ETV6-RUNX1
chr4	86412694	86413404	-1.55638	0.0114866	ETV6-RUNX1
chr4	88327503	88328480	-1.40141	0.0629022	ETV6-RUNX1
chr4	89148882	89150259	-0.883649	0.0109733	All
chr4	89151800	89153162	-1.40273	0.0367075	Hyperdiploid
chr4	89165801	89166779	-1.9366	0.0401269	ETV6-RUNX1
chr4	89801619	89802746	-2.83298	4.28294e-09	ETV6-RUNX1
chr4	89874520	89875289	-1.26924	0.071762	ETV6-RUNX1
chr4	90211394	90212360	-1.96182	0.0450796	ETV6-RUNX1
chr4	101379590	101380492	-1.65418	0.0822642	ETV6-RUNX1
chr4	102793060	102794015	-1.91265	0.00123887	ETV6-RUNX1
chr4	103090527	103091089	-1.6871	0.0256412	ETV6-RUNX1
chr4	103495395	103496423	-0.790762	0.0478412	All
chr4	107917463	107918115	-1.9267	0.0390464	ETV6-RUNX1
chr4	109297998	109298653	-1.19588	0.0513075	ETV6-RUNX1
chr4	109337202	109338292	-2.3199	0.000283598	ETV6-RUNX1
chr4	111393386	111394261	-2.18513	0.0703993	ETV6-RUNX1
chr4	114514428	114515504	-1.34184	0.0137	ETV6-RUNX1
chr4	115204004	115204974	-1.38893	0.0876038	ETV6-RUNX1
chr4	119486831	119487801	-1.90072	0.0468135	ETV6-RUNX1
chr4	124180311	124181059	-1.59986	0.0106383	ETV6-RUNX1
chr4	124570199	124571403	-0.98564	0.0686696	ETV6-RUNX1
chr4	124897353	124898242	-1.62272	0.0823568	ETV6-RUNX1
chr4	124907245	124907872	-1.83587	0.0540891	ETV6-RUNX1
chr4	124939874	124940801	-1.02186	0.0443016	ETV6-RUNX1
chr4	124981255	124982865	-0.835939	0.0582705	ETV6-RUNX1
chr4	125511255	125512095	-1.35386	0.0511618	ETV6-RUNX1
chr4	129479938	129481016	-1.16393	0.0749845	ETV6-RUNX1
chr4	129797121	129797952	-1.62039	0.00785211	ETV6-RUNX1
chr4	131733266	131733999	-1.40212	0.0106383	ETV6-RUNX1
chr4	133858540	133859254	2.03395	0.00765664	ETV6-RUNX1
chr4	134067313	134068340	1.96401	0.000315546	ETV6-RUNX1
chr4	134069588	134070737	2.85235	0.00135544	ETV6-RUNX1
chr4	134071926	134073961	3.54554	1.15745e-12	ETV6-RUNX1
chr4	136888016	136888550	-2.35703	0.0482476	ETV6-RUNX1
chr4	137037741	137038881	-2.22845	6.05083e-05	ETV6-RUNX1
chr4	137070833	137071693	-2.33411	0.00277824	ETV6-RUNX1
chr4	137077708	137078537	-2.18451	0.000163239	ETV6-RUNX1
chr4	138452516	138454556	-1.49667	0.0846882	ETV6-RUNX1
chr4	139483730	139484413	-1.77652	0.00417939	ETV6-RUNX1
chr4	139515950	139517040	-1.9445	0.0274258	ETV6-RUNX1
chr4	143394592	143396189	1.37788	0.00634578	ETV6-RUNX1
chr4	143624731	143625694	1.32379	0.00196436	ETV6-RUNX1
chr4	149521788	149522241	-3.0303	0.00592537	ETV6-RUNX1
chr4	150999197	151000725	-1.87495	4.34906e-05	ETV6-RUNX1
chr4	151044960	151045459	-1.60182	0.0286207	ETV6-RUNX1
chr4	151047270	151048424	-1.46604	0.00118263	ETV6-RUNX1
chr4	151151314	151152503	-1.3125	0.0791544	ETV6-RUNX1
chr4	152638855	152639424	-2.00151	0.0280036	ETV6-RUNX1
chr4	153648880	153650033	-1.58918	0.000927903	ETV6-RUNX1
chr4	154649456	154650456	-1.85164	0.00111979	ETV6-RUNX1
chr4	156473376	156474212	-1.98082	0.0931381	ETV6-RUNX1
chr4	156529539	156530131	-1.74784	0.0484472	ETV6-RUNX1
chr4	157118010	157118939	-1.453	0.0302891	ETV6-RUNX1
chr4	157889607	157890560	1.54539	0.00298424	ETV6-RUNX1
chr4	157891855	157893645	2.5024	3.9613e-06	ETV6-RUNX1
chr4	159858116	159858918	-1.7803	0.00476455	ETV6-RUNX1
chr4	159973048	159973991	-1.80327	0.00701212	ETV6-RUNX1
chr4	160427557	160428946	-1.41651	0.0307466	ETV6-RUNX1
chr4	160610606	160611081	-1.57965	0.0788559	ETV6-RUNX1
chr4	164508764	164509262	-1.48265	0.076777	ETV6-RUNX1
chr4	166531951	166532537	-2.00139	0.0624209	ETV6-RUNX1
chr4	166533676	166534777	-2.4188	0.0401629	ETV6-RUNX1
chr4	169873532	169874448	-1.62771	0.0193447	ETV6-RUNX1
chr4	172255531	172256393	-1.11656	0.0177347	ETV6-RUNX1
chr4	172439231	172440727	-1.08218	0.0852504	ETV6-RUNX1
chr4	172565672	172566351	-1.5092	0.0126677	ETV6-RUNX1
chr4	172800948	172802050	-1.61835	0.000192765	ETV6-RUNX1
chr4	174353617	174354333	-1.78465	0.0374036	ETV6-RUNX1
chr4	175749868	175750704	1.35847	0.0947659	ETV6-RUNX1
chr4	182580251	182580932	-2.3732	0.034812	ETV6-RUNX1
chr4	184263589	184264683	-1.37249	0.00298424	ETV6-RUNX1
chr4	185434967	185436323	-0.944521	0.0744815	All
chr4	186305577	186307289	1.03312	0.0676974	ETV6-RUNX1
chr4	189089691	189090849	1.75718	0.074812	ETV6-RUNX1
chr4	190418191	190419788	2.80378	0.000534725	ETV6-RUNX1
chr4	190706427	190706976	1.49612	0.0699006	ETV6-RUNX1
chr5	1460190	1460785	1.89582	0.0523258	ETV6-RUNX1
chr5	2537047	2539249	-3.0702	0.0448371	Hyperdiploid
chr5	2664191	2665324	-2.94282	0.091055	Hyperdiploid
chr5	3375445	3376294	-1.06083	0.0546437	ETV6-RUNX1
chr5	4628115	4629105	-1.87127	0.0316484	ETV6-RUNX1
chr5	8058696	8059691	-1.28513	0.0726304	ETV6-RUNX1
chr5	8417040	8418505	-1.93094	0.00706366	ETV6-RUNX1
chr5	8654783	8656114	-1.54775	0.037473	ETV6-RUNX1
chr5	14341843	14342733	-1.20971	0.0711046	ETV6-RUNX1
chr5	14357342	14358028	1.61644	0.0403897	ETV6-RUNX1
chr5	14742517	14743367	1.92812	0.0638908	ETV6-RUNX1
chr5	16860271	16860502	-1.56683	0.0679763	ETV6-RUNX1
chr5	16885892	16886921	-1.50089	0.098719	ETV6-RUNX1
chr5	16890378	16891786	-1.81355	0.0756816	ETV6-RUNX1
chr5	16943178	16944911	-1.88856	0.0177347	ETV6-RUNX1
chr5	17907065	17907639	-2.5015	0.000552558	ETV6-RUNX1
chr5	18000664	18001581	-1.20579	0.0515664	ETV6-RUNX1
chr5	32505020	32506085	1.59881	0.0443806	ETV6-RUNX1
chr5	32709223	32711540	0.802617	0.0868242	ETV6-RUNX1
chr5	32711872	32713520	2.09695	0.00861512	ETV6-RUNX1
chr5	32713912	32714459	2.00924	0.00103938	ETV6-RUNX1
chr5	33299691	33300799	-1.55693	0.000230449	ETV6-RUNX1
chr5	33686261	33686930	-1.69387	0.0369903	ETV6-RUNX1
chr5	34752100	34752924	-2.07753	0.000230449	ETV6-RUNX1
chr5	35129937	35130807	-1.87567	0.0166322	ETV6-RUNX1
chr5	35171840	35174470	-1.07563	0.0979379	ETV6-RUNX1
chr5	35849841	35850409	-1.81755	0.0511708	ETV6-RUNX1
chr5	35876353	35877447	-1.19143	0.0384033	ETV6-RUNX1
chr5	39131454	39132557	-1.59108	0.0927284	ETV6-RUNX1
chr5	40484635	40485929	-1.33564	0.068094	ETV6-RUNX1
chr5	40514707	40515737	-1.48448	0.0258891	ETV6-RUNX1
chr5	42666946	42668004	-2.23598	0.049058	ETV6-RUNX1
chr5	42668476	42668728	-2.25943	0.036194	ETV6-RUNX1
chr5	55623386	55624273	-1.23107	0.076777	ETV6-RUNX1
chr5	56031637	56033396	-0.905356	0.0866439	ETV6-RUNX1
chr5	56737257	56738622	-2.104	0.00549394	ETV6-RUNX1
chr5	56741029	56741985	-1.43776	0.0021009	ETV6-RUNX1
chr5	58858549	58859289	-1.22421	0.0921905	ETV6-RUNX1
chr5	59469443	59470081	-1.75555	0.00838042	ETV6-RUNX1
chr5	59480033	59481294	-1.5832	0.0862184	ETV6-RUNX1
chr5	60496263	60496969	-1.64374	0.0502848	ETV6-RUNX1
chr5	64338304	64339531	-1.16588	0.0470914	ETV6-RUNX1
chr5	65891741	65893190	2.06602	0.0312301	ETV6-RUNX1
chr5	66299602	66300999	1.46732	0.00168841	ETV6-RUNX1
chr5	66633683	66634632	-1.57524	0.0862341	ETV6-RUNX1
chr5	66824741	66825247	-1.75447	0.00772137	ETV6-RUNX1
chr5	67272397	67273335	-1.46955	0.0137449	ETV6-RUNX1
chr5	67306669	67306888	-2.44643	0.0122722	ETV6-RUNX1
chr5	76034476	76035200	1.78041	0.0218503	ETV6-RUNX1
chr5	77517658	77518378	-1.21719	0.0191789	ETV6-RUNX1
chr5	79279181	79280134	-2.55368	0.092878	ETV6-RUNX1
chr5	81093998	81094783	-1.71649	0.00216634	ETV6-RUNX1
chr5	81829499	81830535	-1.55747	0.0280384	ETV6-RUNX1
chr5	82116476	82117447	-1.86968	0.00165377	ETV6-RUNX1
chr5	82214396	82215142	-3.50731	2.66849e-07	ETV6-RUNX1
chr5	88207107	88207487	-3.30009	0.00828671	ETV6-RUNX1
chr5	88554660	88555680	-1.74283	0.00188855	ETV6-RUNX1
chr5	93879696	93881972	-1.29739	0.00123887	ETV6-RUNX1
chr5	94384242	94385071	-1.24361	0.0256412	ETV6-RUNX1
chr5	94513530	94514503	-1.12151	0.00838394	ETV6-RUNX1
chr5	95198756	95199457	-1.39379	0.023767	ETV6-RUNX1
chr5	95425884	95426853	-2.23995	0.0064762	ETV6-RUNX1
chr5	95582589	95583704	-2.62082	0.0283761	ETV6-RUNX1
chr5	96528209	96529274	-2.45526	0.000270047	ETV6-RUNX1
chr5	100163037	100164236	-1.01846	0.0957183	ETV6-RUNX1
chr5	102728881	102729813	-1.86218	0.0104279	ETV6-RUNX1
chr5	102897623	102898954	1.09697	0.0438192	ETV6-RUNX1
chr5	103028720	103030024	-1.01654	0.0629546	ETV6-RUNX1
chr5	106940374	106941203	-1.73212	0.046133	ETV6-RUNX1
chr5	109012508	109013099	-1.71475	0.0109733	All
chr5	112022148	112022870	-2.7916	1.12606e-07	ETV6-RUNX1
chr5	115374274	115375107	-2.02059	0.0245825	ETV6-RUNX1
chr5	117841929	117842809	-2.59385	0.000182523	ETV6-RUNX1
chr5	118011133	118012197	-1.76155	0.0967447	ETV6-RUNX1
chr5	118774106	118775520	-2.44968	0.00529438	Hyperdiploid
chr5	122733688	122734513	-1.56743	0.0106212	ETV6-RUNX1
chr5	123788987	123789878	-1.58854	0.0685861	ETV6-RUNX1
chr5	124248062	124248973	-2.22762	0.0071797	ETV6-RUNX1
chr5	127715377	127716509	-1.89202	0.000573429	ETV6-RUNX1
chr5	127789465	127789742	-2.13639	0.0169453	ETV6-RUNX1
chr5	127791158	127792360	-2.56313	0.00150241	ETV6-RUNX1
chr5	131541066	131542036	-1.38972	0.0750214	ETV6-RUNX1
chr5	131733992	131734459	-1.289	0.085704	ETV6-RUNX1
chr5	133077918	133078921	-3.12763	0.033875	Hyperdiploid
chr5	133079409	133080442	-2.33676	5.63683e-05	Hyperdiploid
chr5	134197864	134198595	2.12033	0.0017179	ETV6-RUNX1
chr5	134758997	134759824	-1.17261	0.0401269	ETV6-RUNX1
chr5	135383194	135384200	-1.20908	0.0297594	ETV6-RUNX1
chr5	136834334	136835146	2.02962	0.0547611	ETV6-RUNX1
chr5	140787296	140787986	2.47505	0.0199325	ETV6-RUNX1
chr5	141094567	141095666	1.8322	0.0380379	ETV6-RUNX1
chr5	142510432	142512009	-1.25111	0.0890449	ETV6-RUNX1
chr5	142513172	142513857	-1.76746	0.0449662	ETV6-RUNX1
chr5	142562766	142563798	-1.53073	0.0846882	ETV6-RUNX1
chr5	144090591	144092600	-1.59885	0.0126677	ETV6-RUNX1
chr5	146054807	146056012	1.57922	0.0750214	ETV6-RUNX1
chr5	147129279	147130121	-2.26837	0.0168676	ETV6-RUNX1
chr5	149976082	149977035	-1.30302	0.00298424	ETV6-RUNX1
chr5	153125464	153126952	-2.63471	2.11395e-07	ETV6-RUNX1
chr5	154782555	154783440	-2.43635	1.42252e-05	ETV6-RUNX1
chr5	157863616	157864132	-1.29866	0.0635311	ETV6-RUNX1
chr5	158886875	158887768	-1.47377	0.0256594	ETV6-RUNX1
chr5	163321517	163322433	-1.75184	0.0301314	ETV6-RUNX1
chr5	163341839	163343955	-2.50924	0.0168771	ETV6-RUNX1
chr5	163723062	163724678	-1.43778;-1.27901	0.0268639945296978;0.0955413498562415	ETV6-RUNX1;All
chr5	163820333	163820908	-1.94439	0.0108675	ETV6-RUNX1
chr5	163992511	163993167	-2.40932	0.000568947	ETV6-RUNX1
chr5	164615012	164616573	-1.64192	0.00466106	ETV6-RUNX1
chr5	164986611	164987515	-1.10603	0.0387323	ETV6-RUNX1
chr5	165504141	165504674	-1.73551	0.0779043	ETV6-RUNX1
chr5	165510556	165511231	-1.98482	0.0603729	ETV6-RUNX1
chr5	169169141	169170104	-1.77514	0.00312858	ETV6-RUNX1
chr5	171073810	171075699	-1.91398	0.042097	Hyperdiploid
chr5	171774436	171775164	1.43167	0.0438197	ETV6-RUNX1
chr5	171839675	171840413	-1.05601	0.0996139	ETV6-RUNX1
chr5	173527269	173527781	-1.97613	0.0492982	ETV6-RUNX1
chr5	178581812	178582908	1.31815	0.0923011	ETV6-RUNX1
chr5	179401326	179402761	1.57719	0.0433193	ETV6-RUNX1
chr6	514173	515244	-1.78977	0.0462559	ETV6-RUNX1
chr6	2127731	2128327	1.70589	0.0745841	ETV6-RUNX1
chr6	3348764	3350121	-1.25412	0.0218375	ETV6-RUNX1
chr6	4224926	4226071	1.09719	0.022145	ETV6-RUNX1
chr6	4372951	4373818	-2.21239	0.00455522	ETV6-RUNX1
chr6	5152072	5153371	1.50074	0.0822642	ETV6-RUNX1
chr6	6168710	6169122	1.51716	0.0795303	ETV6-RUNX1
chr6	7342552	7342850	-1.91859	0.0703451	ETV6-RUNX1
chr6	7468824	7469293	2.53745	0.0477931	ETV6-RUNX1
chr6	11628779	11629360	-1.36609	0.0943932	ETV6-RUNX1
chr6	11787948	11788781	-1.74275	0.0708167	ETV6-RUNX1
chr6	13470495	13471344	-1.79477	0.0682088	ETV6-RUNX1
chr6	15474009	15474407	-2.203	0.00326911	ETV6-RUNX1
chr6	17354636	17355304	-1.59345	0.0100519	ETV6-RUNX1
chr6	17740615	17741906	-1.09216	0.0806361	ETV6-RUNX1
chr6	18327804	18329202	-1.52452	0.0558575	ETV6-RUNX1
chr6	21751799	21752508	-2.16996;-1.39142	0.00209673131219716;0.0109733433378205	ETV6-RUNX1;All
chr6	22098789	22099280	-2.47382	0.0374036	ETV6-RUNX1
chr6	26565518	26565995	-2.03522	0.0334521	ETV6-RUNX1
chr6	31275416	31276777	1.50491	0.0220203	ETV6-RUNX1
chr6	32653093	32654278	1.60194	0.0909966	ETV6-RUNX1
chr6	36067149	36068045	1.7897	0.00417939	ETV6-RUNX1
chr6	36294001	36294682	-1.57419	0.00398595	ETV6-RUNX1
chr6	40445256	40446252	-1.16347	0.0993821	All
chr6	41022882	41023627	-1.13815	0.060366	ETV6-RUNX1
chr6	44594684	44595595	-0.921102	0.0298189	ETV6-RUNX1
chr6	44668915	44669506	-2.40884	6.05083e-05	ETV6-RUNX1
chr6	44705765	44706832	-1.3321	0.0449662	ETV6-RUNX1
chr6	46020935	46022527	-1.12165	0.0494935	ETV6-RUNX1
chr6	47992128	47992517	-1.78106	0.0222112	ETV6-RUNX1
chr6	47995281	47995970	-1.23826	0.0482888	ETV6-RUNX1
chr6	48005117	48006211	-1.88496	0.00256165	ETV6-RUNX1
chr6	48220238	48221475	-1.5116	0.000776881	ETV6-RUNX1
chr6	48320961	48321930	-1.62418	0.0143218	ETV6-RUNX1
chr6	49304267	49305118	1.58842	0.0927284	ETV6-RUNX1
chr6	51576290	51577473	-1.10997	0.0810708	ETV6-RUNX1
chr6	52216114	52217755	-1.00407	0.0368602	ETV6-RUNX1
chr6	56708058	56709199	1.675	0.0987391	ETV6-RUNX1
chr6	62995232	62996661	-1.9244	0.0546574	ETV6-RUNX1
chr6	63225707	63226892	-1.73762	0.00152127	ETV6-RUNX1
chr6	68935882	68936833	1.3977	0.0795303	ETV6-RUNX1
chr6	72097572	72098794	-1.36752	0.0121103	ETV6-RUNX1
chr6	75634886	75635897	-1.81526	0.0160226	ETV6-RUNX1
chr6	75794385	75796207	-1.71996	0.0849406	ETV6-RUNX1
chr6	75806151	75807303	-2.46857	0.0703451	ETV6-RUNX1
chr6	81646427	81647118	-2.99446	4.94459e-06	ETV6-RUNX1
chr6	81683746	81684829	-1.56182	0.0494598	ETV6-RUNX1
chr6	82310207	82310808	-2.64199	0.000332826	ETV6-RUNX1
chr6	82323168	82324271	-1.84475	0.0271863	ETV6-RUNX1
chr6	84761671	84762512	-2.32582	0.0334521	ETV6-RUNX1
chr6	88088306	88089401	-1.60718	0.00970972	ETV6-RUNX1
chr6	88591117	88591569	-2.64952	0.00539737	ETV6-RUNX1
chr6	88616851	88618005	-1.02913	0.0533744	All
chr6	88618605	88619368	-1.28047	0.0955413	All
chr6	89254561	89255961	-1.083	0.0993821	All
chr6	89912756	89913190	-2.47597	0.00196979	ETV6-RUNX1
chr6	90284775	90285994	-1.94441	0.0100519	ETV6-RUNX1
chr6	90399383	90400417	-1.62057	0.0916244	ETV6-RUNX1
chr6	93433958	93435557	-2.15906	0.0371464	ETV6-RUNX1
chr6	99373489	99374764	-1.62832	0.0846882	ETV6-RUNX1
chr6	99380180	99381334	-1.34703	0.0579333	ETV6-RUNX1
chr6	99426352	99427337	-2.16654	0.0936606	ETV6-RUNX1
chr6	99678678	99679357	-2.95403	0.00352221	ETV6-RUNX1
chr6	99682986	99683606	-2.10941	0.0218375	ETV6-RUNX1
chr6	101713806	101714361	-1.81477	0.0356097	ETV6-RUNX1
chr6	101960799	101961831	-1.70099	0.0271601	ETV6-RUNX1
chr6	105152494	105153733	-1.39492	0.00624427	ETV6-RUNX1
chr6	106089237	106089858	-2.09873	0.0134797	ETV6-RUNX1
chr6	106188679	106189545	-2.64255	0.0219767	ETV6-RUNX1
chr6	106193761	106194753	-0.933218	0.0665039	All
chr6	106310968	106311716	-2.045	0.0854851	ETV6-RUNX1
chr6	106327939	106328345	-1.96171	0.051808	ETV6-RUNX1
chr6	106340564	106341817	-1.34723	0.0557403	ETV6-RUNX1
chr6	106895793	106896449	-1.62805	0.0243224	ETV6-RUNX1
chr6	106987674	106988324	-1.51936	0.0969479	ETV6-RUNX1
chr6	106994051	106996401	-1.06239	0.0868242	ETV6-RUNX1
chr6	107095903	107097444	-1.64572	0.0493992	ETV6-RUNX1
chr6	107114230	107115202	-1.74758	0.00342232	ETV6-RUNX1
chr6	107871323	107872379	-1.40145	0.0696684	ETV6-RUNX1
chr6	108785955	108786868	-1.51285	0.0420517	ETV6-RUNX1
chr6	109438493	109439330	-1.19615	0.0420621	ETV6-RUNX1
chr6	109561738	109562333	-2.28696	0.0890449	ETV6-RUNX1
chr6	109793555	109794210	-1.53646	0.0368602	ETV6-RUNX1
chr6	110643654	110645175	-1.35891	0.0245628	ETV6-RUNX1
chr6	110863847	110866046	-1.07388	0.0654913	ETV6-RUNX1
chr6	110881626	110883412	-1.86641	0.0141378	ETV6-RUNX1
chr6	111896379	111897898	-1.22524	0.0868242	ETV6-RUNX1
chr6	112013223	112014517	-1.46929	0.0535999	ETV6-RUNX1
chr6	112060141	112060984	-2.25458	0.0234151	ETV6-RUNX1
chr6	112232673	112233192	-2.33046	0.0969479	ETV6-RUNX1
chr6	112271584	112272761	-2.00936	0.0865858	ETV6-RUNX1
chr6	112279046	112280272	-1.9755	0.067679	ETV6-RUNX1
chr6	112318102	112318914	-1.31557	0.0343028	ETV6-RUNX1
chr6	112822848	112823232	-2.12407	0.0438192	ETV6-RUNX1
chr6	114076781	114077201	-2.87498	0.0507222	ETV6-RUNX1
chr6	114130665	114131493	-1.48822	0.0245628	ETV6-RUNX1
chr6	116711872	116714853	-1.4385	0.00516638	ETV6-RUNX1
chr6	116759865	116761015	-1.80632	0.00269531	ETV6-RUNX1
chr6	119468341	119469946	-1.47614	0.0211536	ETV6-RUNX1
chr6	119476999	119477840	-1.10828	0.0993821	All
chr6	119844407	119845519	-1.82893	0.00395737	ETV6-RUNX1
chr6	119854421	119855223	-2.22331	0.0426623	ETV6-RUNX1
chr6	120048768	120050325	-1.6127	0.00362429	ETV6-RUNX1
chr6	120089114	120090205	-1.66492	0.0216786	ETV6-RUNX1
chr6	128891287	128892414	-1.26488	0.0851032	ETV6-RUNX1
chr6	130427405	130428317	-1.38548	0.0668426	ETV6-RUNX1
chr6	130436013	130436643	-1.9627	0.0100804	ETV6-RUNX1
chr6	130437212	130437870	-1.93117	0.057775	ETV6-RUNX1
chr6	130573448	130574333	-2.18114	0.0151874	ETV6-RUNX1
chr6	132346409	132347112	-2.16452	0.0277424	ETV6-RUNX1
chr6	132395442	132396060	-1.94875	0.0111109	ETV6-RUNX1
chr6	132675414	132676456	-1.3843	0.0652669	ETV6-RUNX1
chr6	133992411	133993118	-1.10427	0.0939607	ETV6-RUNX1
chr6	134609232	134610390	-1.35338	0.0482476	ETV6-RUNX1
chr6	134654435	134655101	-2.48485	0.000776881	ETV6-RUNX1
chr6	134694465	134695524	-1.2253	0.0250094	ETV6-RUNX1
chr6	134838322	134839189	-2.67502	0.00298424	ETV6-RUNX1
chr6	136886863	136887625	-1.2282	0.076071	ETV6-RUNX1
chr6	137283637	137284312	-1.45642	0.0530653	ETV6-RUNX1
chr6	137423722	137424574	-1.5352	0.0172715	ETV6-RUNX1
chr6	137726646	137727362	-1.44034	0.0838554	ETV6-RUNX1
chr6	138235674	138236382	-1.41857	0.067679	ETV6-RUNX1
chr6	138875982	138877194	-1.37303	0.0699006	ETV6-RUNX1
chr6	139435663	139436552	-1.2885	0.0219285	ETV6-RUNX1
chr6	139658825	139660435	-1.94677	0.000446852	ETV6-RUNX1
chr6	139682201	139683421	-1.92348	0.000566754	ETV6-RUNX1
chr6	140283791	140284439	-1.76148	0.0985169	ETV6-RUNX1
chr6	143036390	143037756	-1.55704	0.0478966	ETV6-RUNX1
chr6	149092717	149093495	-1.43216	0.0726304	ETV6-RUNX1
chr6	149387062	149387847	-1.24222	0.0996721	ETV6-RUNX1
chr6	149578402	149579586	-1.40333;-1.79874	0.0993821343534937;0.0168679818372114	All;Hyperdiploid
chr6	149929371	149930263	-1.57779	0.0472255	ETV6-RUNX1
chr6	150525474	150526600	-2.23675	0.00703367	ETV6-RUNX1
chr6	150634979	150636217	-1.37681	0.0671043	ETV6-RUNX1
chr6	150807084	150807659	-2.70607	0.0150629	ETV6-RUNX1
chr6	150824432	150825237	-1.90099	0.00298424	ETV6-RUNX1
chr6	155530095	155530485	-2.12386	0.0455686	ETV6-RUNX1
chr6	156336303	156336786	-2.51061	0.0138988	ETV6-RUNX1
chr6	156452266	156453023	-1.29192	0.0399322	ETV6-RUNX1
chr6	157040678	157041854	-1.11833	0.0449662	ETV6-RUNX1
chr6	158704251	158705420	-1.3034	0.0369387	ETV6-RUNX1
chr6	159192039	159193035	2.57975	0.0358103	ETV6-RUNX1
chr6	160250671	160252078	-1.34605	0.00597356	ETV6-RUNX1
chr6	160257474	160258517	-2.18729;-2.62208;-2.40764	0.00829283164824138;5.63682610059681e-05;0.0244487262530793	All;Hyperdiploid;ETV6-RUNX1
chr6	160399716	160400795	-1.54364	0.00340624	ETV6-RUNX1
chr6	166029250	166029879	-2.84846	0.0101057	ETV6-RUNX1
chr6	166879071	166879907	-1.71593	0.0310425	ETV6-RUNX1
chr6	166928326	166929113	-1.54725	0.0160636	ETV6-RUNX1
chr6	166954420	166955629	-1.49053	0.0280746	ETV6-RUNX1
chr6	167050476	167052304	-1.66562	0.0104763	ETV6-RUNX1
chr6	167256915	167257304	-2.07572	0.018428	ETV6-RUNX1
chr6	167486961	167487662	-1.95445	0.0401421	ETV6-RUNX1
chr6	167609250	167609609	-2.11519	0.050948	ETV6-RUNX1
chr6	167624228	167625022	-1.69422	0.00387359	ETV6-RUNX1
chr6	168134608	168135686	-1.45541	0.0252487	ETV6-RUNX1
chr6	168436322	168437119	2.6111	0.0125147	ETV6-RUNX1
chr6	168746197	168747463	1.49583	0.0219767	ETV6-RUNX1
chr6	170726909	170728043	-1.86234	0.00208255	ETV6-RUNX1
chr7	1067399	1068693	0.931415	0.0642397	ETV6-RUNX1
chr7	1371077	1372892	1.87155	0.00025862	ETV6-RUNX1
chr7	2112817	2114666	1.04287	0.0135439	ETV6-RUNX1
chr7	6273892	6274665	-1.75565	0.00388825	ETV6-RUNX1
chr7	6334227	6334898	-1.48986	0.0909966	ETV6-RUNX1
chr7	7310631	7311440	-1.37611	0.00298424	ETV6-RUNX1
chr7	7758819	7759607	-1.70073	0.00970972	ETV6-RUNX1
chr7	11545373	11546415	-1.51715	0.0557853	ETV6-RUNX1
chr7	11727942	11729430	-1.06376	0.0621981	ETV6-RUNX1
chr7	11737933	11738508	-1.72338	0.0150391	ETV6-RUNX1
chr7	11815310	11816147	-2.19762	0.00269531	ETV6-RUNX1
chr7	11870859	11872187	-1.93216	0.0652669	ETV6-RUNX1
chr7	11872803	11873486	-2.05139	0.0125632	ETV6-RUNX1
chr7	12318110	12318500	-2.55446	0.00212247	ETV6-RUNX1
chr7	13678839	13679472	-3.13584	0.00539737	ETV6-RUNX1
chr7	16980306	16980802	1.65935	0.0941638	ETV6-RUNX1
chr7	17080885	17081420	-1.85489	0.0122762	ETV6-RUNX1
chr7	18429649	18430524	-1.84084	0.0071797	ETV6-RUNX1
chr7	18559935	18561045	-1.3868	0.028285	ETV6-RUNX1
chr7	22342450	22342920	-2.08088	0.0201445	ETV6-RUNX1
chr7	23245474	23246851	2.24333	0.0745841	ETV6-RUNX1
chr7	27169371	27171022	2.66614	0.00613703	ETV6-RUNX1
chr7	29358975	29360308	-1.61478	0.0357859	ETV6-RUNX1
chr7	30195171	30195513	-1.44701	0.0559536	ETV6-RUNX1
chr7	33943558	33945440	-0.904835	0.0425309	ETV6-RUNX1
chr7	33957819	33959085	-1.82867	1.57401e-06	ETV6-RUNX1
chr7	34221497	34222025	-1.42273	0.0973489	ETV6-RUNX1
chr7	36007059	36007630	-1.5845	0.0909966	ETV6-RUNX1
chr7	38388762	38389949	-1.66794	0.0853392	ETV6-RUNX1
chr7	38392995	38394134	-1.34988	0.0389613	ETV6-RUNX1
chr7	39388509	39389824	-1.18105	0.0337675	ETV6-RUNX1
chr7	42238322	42239474	-1.92907;-1.78498	0.0167911910052827;0.0134197326298838	All;ETV6-RUNX1
chr7	42377760	42378554	-2.25611	0.0923011	ETV6-RUNX1
chr7	42532729	42533726	-1.15294	0.0939607	ETV6-RUNX1
chr7	44012903	44013731	-1.64059	0.0470397	ETV6-RUNX1
chr7	45364811	45365453	-2.09297	0.00832989	ETV6-RUNX1
chr7	47077945	47079001	-1.33655	0.083437	ETV6-RUNX1
chr7	47266025	47268554	-1.81475	0.00269531	ETV6-RUNX1
chr7	47872579	47873601	-2.2495	0.00485772	ETV6-RUNX1
chr7	50803166	50803639	-1.45334	0.0825944	ETV6-RUNX1
chr7	50873144	50874036	-2.00673	0.0795111	ETV6-RUNX1
chr7	67252470	67254116	-2.3816	0.0426616	All
chr7	67846416	67847468	-2.11109	0.000514754	ETV6-RUNX1
chr7	69111372	69112413	-1.75473	0.044269	ETV6-RUNX1
chr7	69160979	69162490	-1.27619	0.0607462	ETV6-RUNX1
chr7	71785365	71786257	1.37061	0.0923011	ETV6-RUNX1
chr7	71848122	71848790	-1.41561	0.0542949	ETV6-RUNX1
chr7	73300333	73301298	1.38124	0.0357968	ETV6-RUNX1
chr7	74081286	74081944	1.39953	0.099323	ETV6-RUNX1
chr7	81314228	81314756	-1.97375	0.0967447	ETV6-RUNX1
chr7	82587187	82588309	-1.07525	0.0918468	ETV6-RUNX1
chr7	84681634	84682966	-1.2819	0.0807182	ETV6-RUNX1
chr7	85100738	85101666	-1.39839	0.0534872	ETV6-RUNX1
chr7	95914422	95915544	-1.20187	0.0255188	ETV6-RUNX1
chr7	98143435	98144426	-2.46478	0.00344598	ETV6-RUNX1
chr7	98399484	98400635	-1.99771	0.00132655	ETV6-RUNX1
chr7	99709377	99710056	1.77337	0.0101154	ETV6-RUNX1
chr7	100396289	100397516	-1.20697	0.00730641	ETV6-RUNX1
chr7	106397509	106398763	-1.75611	0.00074556	ETV6-RUNX1
chr7	106508002	106508473	2.11666	0.00885739	ETV6-RUNX1
chr7	106626077	106627079	1.6559	0.000732617	ETV6-RUNX1
chr7	106716919	106718075	1.61746	0.0541014	ETV6-RUNX1
chr7	111195958	111196458	-2.70495	0.00802676	ETV6-RUNX1
chr7	116223015	116224190	-1.11995	0.0745341	ETV6-RUNX1
chr7	124701910	124702573	1.79121	0.0367769	ETV6-RUNX1
chr7	124955061	124955864	3.06523	0.000232141	ETV6-RUNX1
chr7	124956396	124956932	2.79626	0.000287215	ETV6-RUNX1
chr7	125301264	125302341	3.0097	0.00269531	ETV6-RUNX1
chr7	133505485	133506039	1.92824	0.0872777	ETV6-RUNX1
chr7	134284067	134284840	-1.81596	0.0358103	ETV6-RUNX1
chr7	137378955	137379903	-3.00194	0.00097149	ETV6-RUNX1
chr7	137942264	137942857	1.60321	0.0196057	ETV6-RUNX1
chr7	139784176	139785510	2.43298	0.0192197	ETV6-RUNX1
chr7	142143154	142144522	-0.879469	0.049572	ETV6-RUNX1
chr7	142334040	142335609	-0.980986	0.0635311	ETV6-RUNX1
chr7	142411540	142412134	-2.39541	0.0356006	ETV6-RUNX1
chr7	142419694	142420341	-2.07429	0.0357968	ETV6-RUNX1
chr7	142425169	142425634	-5.44185	5.75123e-06	ETV6-RUNX1
chr7	142428322	142429325	-4.19561	0.00424613	ETV6-RUNX1
chr7	142510121	142511131	-1.44052	0.00266063	ETV6-RUNX1
chr7	142878367	142878910	1.12096	0.090724	All
chr7	146750340	146751521	-1.95008	0.0464173	ETV6-RUNX1
chr7	151097765	151098277	-2.21906	0.0823568	ETV6-RUNX1
chr7	155754316	155754980	-1.82299	0.00673176	ETV6-RUNX1
chr7	158032183	158032695	1.59443	0.0498216	ETV6-RUNX1
chr7	158563831	158564580	1.75824	0.00209673	ETV6-RUNX1
chr7	158569337	158569686	2.05859	0.0801207	ETV6-RUNX1
chr7	158983671	158984937	-1.88978	0.0194414	ETV6-RUNX1
chr8	604862	606393	1.00983	0.0849406	ETV6-RUNX1
chr8	2686907	2687496	2.05615	0.0227583	ETV6-RUNX1
chr8	2851642	2852138	1.61538	0.0750214	ETV6-RUNX1
chr8	3181645	3182421	-2.39682	0.0244487	ETV6-RUNX1
chr8	5820737	5821323	2.27666	0.0386302	ETV6-RUNX1
chr8	5827892	5828746	2.10707	0.0822642	ETV6-RUNX1
chr8	8095898	8096603	-1.14718	0.0829226	ETV6-RUNX1
chr8	11490394	11491076	1.73695	0.0220696	ETV6-RUNX1
chr8	12944797	12945717	-1.48544	0.0255188	ETV6-RUNX1
chr8	19295573	19296454	-1.66014	0.0191882	ETV6-RUNX1
chr8	19310022	19310678	-1.71196	0.00323821	ETV6-RUNX1
chr8	19492725	19493296	-1.5411	0.0745341	ETV6-RUNX1
chr8	19597447	19598631	-1.19475	0.0192149	ETV6-RUNX1
chr8	21064609	21065629	-1.23678	0.0641881	ETV6-RUNX1
chr8	22246884	22247664	1.56312	0.0362689	ETV6-RUNX1
chr8	23161175	23162685	-1.53629	0.0144165	ETV6-RUNX1
chr8	25565583	25566904	-1.44603	0.0706957	ETV6-RUNX1
chr8	26248340	26248977	2.49023	0.00182843	ETV6-RUNX1
chr8	27177361	27177845	-2.12643	0.000809411	ETV6-RUNX1
chr8	29903573	29904383	2.08936	0.00439549	ETV6-RUNX1
chr8	33454602	33455730	-0.869187	0.0788692	ETV6-RUNX1
chr8	35443653	35444540	-1.93668	0.000790981	ETV6-RUNX1
chr8	35767122	35767677	-1.39162	0.0641622	ETV6-RUNX1
chr8	38287926	38289405	-0.917587	0.0201367	All
chr8	41502498	41504394	-1.0839	0.0369903	ETV6-RUNX1
chr8	41504546	41505022	-1.50909	0.0519848	ETV6-RUNX1
chr8	41521189	41521879	-1.65014	0.0390464	ETV6-RUNX1
chr8	41522577	41523316	-2.14519	0.0030138	ETV6-RUNX1
chr8	41649501	41650373	-2.04804	0.00326242	ETV6-RUNX1
chr8	41803868	41804793	-2.16697	0.0199325	ETV6-RUNX1
chr8	51533396	51534464	-1.75348	0.0182849	ETV6-RUNX1
chr8	52859823	52860504	2.54453	0.0186545	ETV6-RUNX1
chr8	53134510	53135474	-1.28253	0.00274849	ETV6-RUNX1
chr8	54166085	54166503	-2.54293	0.00122649	ETV6-RUNX1
chr8	55983904	55985262	-1.39292	0.0319849	ETV6-RUNX1
chr8	56358147	56358832	-1.73386	0.0862184	ETV6-RUNX1
chr8	56831790	56832643	-1.06474	0.0846351	ETV6-RUNX1
chr8	60197277	60198120	-1.73194	0.00517609	ETV6-RUNX1
chr8	61879868	61880445	-2.31973	0.00417939	ETV6-RUNX1
chr8	61893299	61894135	-1.24322	0.0969479	ETV6-RUNX1
chr8	66150794	66151735	3.84238	6.93008e-06	ETV6-RUNX1
chr8	66209654	66210865	1.21703	0.0114335	ETV6-RUNX1
chr8	66279380	66280319	1.32525	0.0911346	ETV6-RUNX1
chr8	67042202	67043016	-1.39369	0.00877682	ETV6-RUNX1
chr8	67246930	67247484	-1.47853	0.0150075	ETV6-RUNX1
chr8	67460896	67461679	-1.87576	0.0600345	ETV6-RUNX1
chr8	68431094	68431652	-2.25789	0.000180264	ETV6-RUNX1
chr8	68469714	68470439	-1.74191	0.0558504	ETV6-RUNX1
chr8	68472143	68473037	-2.72352	0.00220283	ETV6-RUNX1
chr8	71493352	71494289	-1.54732	0.0288125	ETV6-RUNX1
chr8	72142038	72142967	-1.95505	0.0334521	ETV6-RUNX1
chr8	74502655	74503706	-1.18812	0.0731254	ETV6-RUNX1
chr8	74668155	74668997	-1.06105	0.0809426	ETV6-RUNX1
chr8	75109845	75111994	-0.940864	0.0951796	ETV6-RUNX1
chr8	75131724	75132689	-1.0932	0.0596356	ETV6-RUNX1
chr8	75458108	75460550	-1.62869	0.00188621	ETV6-RUNX1
chr8	75517092	75517618	-3.2534	0.00156442	ETV6-RUNX1
chr8	75896357	75897629	-3.27122	2.32059e-08	ETV6-RUNX1
chr8	81058894	81059998	-1.20308	0.0540891	ETV6-RUNX1
chr8	81079665	81080194	-0.991407	0.089716	ETV6-RUNX1
chr8	90255469	90256510	-1.51102	0.00630476	ETV6-RUNX1
chr8	90644491	90645159	-1.69441	0.0538785	ETV6-RUNX1
chr8	90655359	90656497	-1.06788;-2.00396	0.0993821343534937;0.0244487262530793	All;ETV6-RUNX1
chr8	95094113	95094859	-2.24157	0.0301698	ETV6-RUNX1
chr8	95131827	95132924	-1.35972	0.0939607	ETV6-RUNX1
chr8	99789697	99790003	-3.04659	0.00476455	ETV6-RUNX1
chr8	99792917	99794349	-1.27507	0.0495897	ETV6-RUNX1
chr8	100714473	100715198	-2.11324	0.0172047	ETV6-RUNX1
chr8	101512146	101512610	-1.84915	0.00214657	ETV6-RUNX1
chr8	101814653	101815049	-1.36049	0.0981695	ETV6-RUNX1
chr8	101913570	101914708	-0.997578	0.055035	ETV6-RUNX1
chr8	104090752	104091434	2.1434	0.033467	ETV6-RUNX1
chr8	105600472	105602285	1.78867	0.0969922	ETV6-RUNX1
chr8	105738719	105739827	3.64331	1.7999e-11	ETV6-RUNX1
chr8	105800123	105801541	1.59343	0.00174493	ETV6-RUNX1
chr8	105817064	105817927	2.11794	0.0606961	ETV6-RUNX1
chr8	105876595	105877165	-2.37493	0.0367075	Hyperdiploid
chr8	105880035	105881134	3.05689;-3.23378	0.00849440474808494;1.96250131128817e-05	ETV6-RUNX1;Hyperdiploid
chr8	106330370	106332035	2.72184	0.00836077	ETV6-RUNX1
chr8	106532578	106533355	4.05964	4.94459e-06	ETV6-RUNX1
chr8	106536173	106537071	2.84262	0.00476455	ETV6-RUNX1
chr8	107669424	107671152	1.47604	0.0677379	ETV6-RUNX1
chr8	109799420	109800065	1.77931	0.013212	ETV6-RUNX1
chr8	111072461	111073239	-2.41376	0.000160449	ETV6-RUNX1
chr8	121135823	121137159	1.12906	0.0418041	ETV6-RUNX1
chr8	122653575	122655219	0.737615	0.0167912	All
chr8	124503823	124504103	-2.1007	0.0405701	ETV6-RUNX1
chr8	124514439	124515127	-1.83817	0.00514052	ETV6-RUNX1
chr8	124528505	124529801	-1.40748	0.00498653	ETV6-RUNX1
chr8	124934083	124935115	2.00196	5.92607e-05	ETV6-RUNX1
chr8	126083640	126084519	1.60901	0.0634887	ETV6-RUNX1
chr8	128208841	128209776	-1.65339	0.0287754	ETV6-RUNX1
chr8	130566460	130567277	-1.55098	0.00782873	ETV6-RUNX1
chr8	130691168	130691938	-1.89312	0.0058921	ETV6-RUNX1
chr8	131441957	131442557	-1.66064	0.0101057	ETV6-RUNX1
chr8	134497605	134499047	-1.10901	0.0785451	ETV6-RUNX1
chr8	139779427	139780515	1.74932	0.00784766	ETV6-RUNX1
chr8	140788197	140790117	-1.38239	0.00508011	ETV6-RUNX1
chr8	142179295	142180222	2.04093	2.24787e-06	ETV6-RUNX1
chr8	142839868	142840187	3.29077	1.42252e-05	ETV6-RUNX1
chr8	142848549	142848963	1.88641	0.0236949	ETV6-RUNX1
chr8	142862980	142864027	3.24359	0.0156387	ETV6-RUNX1
chr8	143757211	143757940	-1.46914	0.0110809	ETV6-RUNX1
chr8	144684303	144684991	1.37415	0.00351819	ETV6-RUNX1
chr8	144724393	144725331	1.34147	0.043713	ETV6-RUNX1
chr8	145278407	145279141	1.4912	0.098917	ETV6-RUNX1
chr8	145539089	145540056	1.00928;1.52662	0.0993821343534937;0.0259960047317218	All;ETV6-RUNX1
chr8	145638300	145639348	1.62899	0.000776881	ETV6-RUNX1
chr8	145725975	145726991	1.35881	0.0430274	ETV6-RUNX1
chr8	146282467	146283640	-2.17612	4.70618e-06	ETV6-RUNX1
chr9	3758519	3760254	-1.25723	0.0652669	ETV6-RUNX1
chr9	3809584	3810354	-2.06679	0.000277913	ETV6-RUNX1
chr9	3849952	3850682	-1.89362	0.0333693	ETV6-RUNX1
chr9	3951423	3953035	-1.48786	0.0387323	ETV6-RUNX1
chr9	4207660	4208835	-2.20569;-2.54761	0.00685848400525885;0.00781789217067997	All;ETV6-RUNX1
chr9	7879389	7880507	-0.794291	0.0675548	ETV6-RUNX1
chr9	8694852	8695781	-1.70019	0.072901	ETV6-RUNX1
chr9	8719751	8720650	2.74964	4.59186e-08	ETV6-RUNX1
chr9	9903724	9904524	1.61809	0.055035	ETV6-RUNX1
chr9	13967112	13968075	-1.61674	0.0426623	ETV6-RUNX1
chr9	13972024	13972691	-2.01497	0.000277913	ETV6-RUNX1
chr9	14692739	14694187	1.41154	0.00443514	ETV6-RUNX1
chr9	16254505	16255185	-1.77892	0.0606961	ETV6-RUNX1
chr9	16289100	16290562	-1.89367	0.00965776	ETV6-RUNX1
chr9	17177183	17178217	-2.61425	0.000660241	ETV6-RUNX1
chr9	17216183	17217699	-1.77316	0.0793654	ETV6-RUNX1
chr9	19513426	19514301	-1.7316	0.0359932	ETV6-RUNX1
chr9	21381577	21382416	-1.04176	0.0582705	ETV6-RUNX1
chr9	22240732	22241244	-1.62845	0.0460424	ETV6-RUNX1
chr9	22483485	22484130	1.72813	0.0969479	ETV6-RUNX1
chr9	36801991	36802731	-1.55844	0.0417298	ETV6-RUNX1
chr9	37565159	37566416	-1.50463	0.0395271	ETV6-RUNX1
chr9	37621237	37622066	-1.90878	0.00299286	ETV6-RUNX1
chr9	38225149	38225684	-1.28664	0.0832721	ETV6-RUNX1
chr9	38642096	38643810	-1.14791	0.00417939	ETV6-RUNX1
chr9	38690403	38691380	-1.7144	0.0055305	ETV6-RUNX1
chr9	38692594	38693937	-1.31605	0.062049	ETV6-RUNX1
chr9	38708047	38709556	-1.03566	0.0948493	ETV6-RUNX1
chr9	40791466	40792232	2.71182	0.0177347	ETV6-RUNX1
chr9	71420813	71421828	-1.87296	0.00835291	ETV6-RUNX1
chr9	71519528	71520441	-1.97813	0.0624209	ETV6-RUNX1
chr9	72083829	72084597	-1.5441	0.0205792	ETV6-RUNX1
chr9	73108874	73110792	-0.959923	0.0884103	ETV6-RUNX1
chr9	73196072	73196714	2.05689	0.0987391	ETV6-RUNX1
chr9	75624789	75625460	-1.54764	0.021346	ETV6-RUNX1
chr9	76952925	76954109	-1.82875	0.00991177	ETV6-RUNX1
chr9	83987679	83988557	-1.78745	0.0322674	ETV6-RUNX1
chr9	88555394	88556869	0.347543	0.0292248	All
chr9	89190559	89192055	-2.14479	0.00344451	ETV6-RUNX1
chr9	90112221	90113905	1.10421	0.001804	ETV6-RUNX1
chr9	90118884	90119681	1.91644	0.0028797	ETV6-RUNX1
chr9	92841286	92841773	-1.56589	0.078475	ETV6-RUNX1
chr9	93697497	93698221	2.61581	0.0388925	ETV6-RUNX1
chr9	93736346	93738705	2.64886	0.0171543	ETV6-RUNX1
chr9	98202937	98203698	1.78983	0.0949717	ETV6-RUNX1
chr9	99179426	99181740	0.381632	0.0648768	All
chr9	100690419	100691063	2.45493	0.00169734	ETV6-RUNX1
chr9	100700422	100701068	1.41806	0.0178389	ETV6-RUNX1
chr9	101494738	101495327	-2.00992	0.0582705	ETV6-RUNX1
chr9	102058255	102059299	2.90389	0.0013412	ETV6-RUNX1
chr9	103170961	103171347	-2.10972	0.00274849	ETV6-RUNX1
chr9	107534906	107535447	-1.24413	0.056616	ETV6-RUNX1
chr9	107900475	107901444	-2.07713	0.087459	ETV6-RUNX1
chr9	108639865	108640504	-1.35454	0.0336185	ETV6-RUNX1
chr9	108652588	108653402	-1.89355	0.0210327	ETV6-RUNX1
chr9	110227593	110228766	1.91996	0.000228638	ETV6-RUNX1
chr9	111407507	111408529	-1.74183	0.0196057	ETV6-RUNX1
chr9	112402101	112403899	-2.28457	0.00581323	ETV6-RUNX1
chr9	114711223	114712144	-1.7883	0.0313912	ETV6-RUNX1
chr9	116820845	116822084	-1.2026	0.0458174	ETV6-RUNX1
chr9	117479359	117480155	-1.75196	0.092878	ETV6-RUNX1
chr9	123994758	123995574	-1.82955	0.00570096	ETV6-RUNX1
chr9	129154084	129155246	2.87066	1.17713e-08	ETV6-RUNX1
chr9	130824990	130825445	-1.58457	0.0155461	ETV6-RUNX1
chr9	131405190	131406036	1.58303	0.0449925	ETV6-RUNX1
chr9	134103041	134104162	-1.29692	0.0539441	ETV6-RUNX1
chr9	134388505	134388924	2.11081	0.00499443	ETV6-RUNX1
chr9	137584951	137586306	2.25813	1.57401e-06	ETV6-RUNX1
chr9	139114519	139115927	1.73615	2.35291e-06	ETV6-RUNX1
chr9	139545001	139545634	1.22074	0.0511618	ETV6-RUNX1
chr9	139651587	139653075	0.859158	0.0576407	ETV6-RUNX1
chr9	140277426	140278362	1.80088	0.022239	ETV6-RUNX1
chr9	140285008	140286102	1.5092	0.0195457	ETV6-RUNX1
chr9	140609642	140610257	3.35896	2.04316e-06	ETV6-RUNX1
chr9	140639808	140640405	2.58913	2.72657e-05	ETV6-RUNX1
chr9	140909349	140910269	2.29305	0.0218503	ETV6-RUNX1
chrX	8651854	8653076	-1.89482	0.0125147	ETV6-RUNX1
chrX	9149639	9150289	-1.76207	0.0538785	ETV6-RUNX1
chrX	9735249	9736826	-1.59866	0.0574692	ETV6-RUNX1
chrX	10203913	10204703	-2.13675	0.00676221	ETV6-RUNX1
chrX	11810765	11811651	-1.47799	0.0234714	ETV6-RUNX1
chrX	13778660	13779175	-1.68357	0.0245628	ETV6-RUNX1
chrX	13781486	13782972	-1.31037	0.0122722	ETV6-RUNX1
chrX	16006553	16008073	-2.43704	0.00406308	ETV6-RUNX1
chrX	22451053	22452180	-1.59061	0.0790615	ETV6-RUNX1
chrX	37634964	37636505	-1.79756	0.0190125	ETV6-RUNX1
chrX	39098267	39098814	-2.211	0.0156539	ETV6-RUNX1
chrX	39764428	39765341	-1.91335	0.0102275	Hyperdiploid
chrX	42563446	42564279	-1.11217	0.0439225	All
chrX	46570233	46571300	-1.08031	0.0882177	ETV6-RUNX1
chrX	49900979	49902068	1.18526	0.0860565	ETV6-RUNX1
chrX	54800981	54801358	-2.48396	0.0804934	ETV6-RUNX1
chrX	54891613	54892052	-1.72103	0.0881857	ETV6-RUNX1
chrX	65232930	65233605	-1.17916	0.0985169	ETV6-RUNX1
chrX	65265931	65267347	-1.13842	0.0923487	ETV6-RUNX1
chrX	68133992	68134814	-1.49519	0.015377	ETV6-RUNX1
chrX	68835451	68836761	-1.58859	0.0706957	ETV6-RUNX1
chrX	70539926	70540559	-1.2119	0.0800164	ETV6-RUNX1
chrX	72948338	72949436	-2.11573	0.0325915	ETV6-RUNX1
chrX	73136801	73137607	-2.0075	0.023513	ETV6-RUNX1
chrX	73639635	73641814	-1.3495	0.010883	ETV6-RUNX1
chrX	73702596	73703275	-2.56315	0.00277824	ETV6-RUNX1
chrX	77588775	77589514	-1.29222	0.051808	ETV6-RUNX1
chrX	99929649	99930250	-2.10529	0.0113334	ETV6-RUNX1
chrX	101771052	101772413	-2.86181	0.0158396	ETV6-RUNX1
chrX	102113999	102114603	-2.308	0.041107	ETV6-RUNX1
chrX	111124767	111125842	-1.3635	0.0105879	ETV6-RUNX1
chrX	111540180	111541138	-1.29244	0.00298641	ETV6-RUNX1
chrX	118125652	118126959	-1.84079	0.0357859	ETV6-RUNX1
chrX	123342319	123343020	-1.50582	0.00592537	ETV6-RUNX1
chrX	123359802	123360404	-1.71754	0.0147557	ETV6-RUNX1
chrX	123408043	123409500	-2.03954	0.000109556	ETV6-RUNX1
chrX	126596166	126596971	-2.27468	0.0863759	ETV6-RUNX1
chrX	126614960	126615813	-2.34448	0.0223289	ETV6-RUNX1
chrX	126624625	126625691	-2.02666	0.00498653	ETV6-RUNX1
chrX	128835377	128836253	-1.62272	0.0495897	ETV6-RUNX1
chrX	128889392	128890636	-0.966069	0.0734123	ETV6-RUNX1
chrX	129157671	129158705	-0.992032	0.0226995	ETV6-RUNX1
chrX	129215905	129217056	-0.912067	0.0684209	ETV6-RUNX1
chrX	129225715	129226733	-1.03544	0.080784	ETV6-RUNX1
chrX	129967959	129968619	-1.66619	0.0570025	ETV6-RUNX1
chrX	129970167	129970683	-1.80536	0.0652669	ETV6-RUNX1
chrX	130369278	130370633	-1.18726	0.0333693	ETV6-RUNX1
chrX	130838032	130839506	-3.45141	0.00244659	ETV6-RUNX1
chrX	131614433	131615849	-0.991136	0.0570025	ETV6-RUNX1
chrX	131725683	131727504	-1.00562	0.0862184	ETV6-RUNX1
chrX	131884435	131885784	-1.08631	0.0660281	ETV6-RUNX1
chrX	132479225	132479971	-1.92659	0.0152334	ETV6-RUNX1
chrX	132514639	132515894	-0.978577	0.0991146	ETV6-RUNX1
chrX	132579241	132579966	-1.80594	0.0320687	ETV6-RUNX1
chrX	132815460	132816013	-1.40528	0.0847854	ETV6-RUNX1
chrX	132819813	132820627	-3.79221	1.7999e-11	ETV6-RUNX1
chrX	134137907	134138632	1.61261	0.00719446	ETV6-RUNX1
chrX	134200363	134201148	3.34614	2.80606e-05	ETV6-RUNX1
chrX	134646400	134647354	-1.9893	0.0601382	ETV6-RUNX1
chrX	135147073	135147715	-1.53628	0.0427008	ETV6-RUNX1
chrX	135152518	135153569	-1.44199	0.0310425	ETV6-RUNX1
chrX	135208912	135209711	-2.09874	0.0703993	ETV6-RUNX1
chrX	135278662	135279287	-1.93967	0.0070906	ETV6-RUNX1
chrX	135291047	135293210	-0.89699	0.0647316	ETV6-RUNX1
chrX	135310213	135311321	-1.31425	0.0420621	ETV6-RUNX1
chrX	135352988	135354355	-1.27397	0.00684267	ETV6-RUNX1
chrX	135836892	135837253	-2.30937	0.0847515	ETV6-RUNX1
chrX	135910822	135911680	-1.55084	0.0807904	ETV6-RUNX1
chrX	135917422	135918409	-1.59999	0.030123	ETV6-RUNX1
chrX	136831447	136832074	-1.83705	0.0387323	ETV6-RUNX1
chrX	136834620	136835794	-1.98996	0.021289	ETV6-RUNX1
chrX	138626778	138627445	-1.72328	0.0703451	ETV6-RUNX1
chrX	138913626	138914583	-1.50028	0.0190691	ETV6-RUNX1
chrX	138935004	138935531	-2.15643	0.0391982	ETV6-RUNX1
chrX	147461459	147463381	-1.50087	0.0546437	ETV6-RUNX1
chrX	149230746	149232201	-2.09113	0.0120079	ETV6-RUNX1
chrX	149289415	149290126	-2.63149	0.000768402	ETV6-RUNX1
chrX	149368288	149369710	-2.11646;-1.42654	0.000113203583159911;0.0478411952853021	ETV6-RUNX1;All
chrX	149385994	149387012	-1.79607	0.0169905	ETV6-RUNX1
chrX	149394802	149396322	-1.47212	0.00327717	ETV6-RUNX1
chrX	149494082	149495432	-1.48898	0.0302694	ETV6-RUNX1
chrX	149577198	149578276	-1.29364	0.0937043	ETV6-RUNX1
chrX	149752853	149753916	-1.71618	0.0560158	ETV6-RUNX1
chrX	150768670	150769499	-2.30642	0.00227817	ETV6-RUNX1
chrX	150792373	150793860	-2.28276	0.00190407	ETV6-RUNX1
chrX	150879436	150881010	-1.70446	0.0359738	ETV6-RUNX1
chrX	150882114	150882945	-2.422	0.0032598	ETV6-RUNX1
chrX	150890906	150893038	-1.79704	0.0725138	ETV6-RUNX1
chrX	150900540	150900898	-2.35186	0.0219767	ETV6-RUNX1
chrX	151318045	151318971	-2.1978	0.0303222	ETV6-RUNX1
chrX	152081851	152082347	-1.29132	0.0919232	ETV6-RUNX1
chrX	152839301	152840585	-2.08049	0.0109581	ETV6-RUNX1
chrX	153009597	153010477	-1.49641	0.0215814	ETV6-RUNX1
chrX	153269154	153270444	-1.97347	0.0958497	ETV6-RUNX1
chrX	153272906	153273811	-1.78395	0.0287754	ETV6-RUNX1
chrX	153922796	153923722	-1.68668	0.0832721	ETV6-RUNX1
chrX	153962399	153963139	-1.9805	0.0187184	ETV6-RUNX1
