# Supplementary material for: Epigenomic profiling of glucocorticoid responses identifies cis-regulatory disruptions impacting steroid resistance in childhood acute lymphoblastic leukemia
Source: Leukemia. Author manuscript; Available in PMC 2022 Oct 4. (PMC9522591; doi:10.1038/s41375-022-01685-z)
Supplement: 1833642_Sup_Tab_3 [file NIHMS1833642-supplement-1833642_Sup_Tab_3.xlsx]

## Sheet: Supplementary Table 3
Supplementary Table 3. CRISPRi screen sgRNAs
sgRNA sequence	GR site	GR site location
GACACAGTTACACAGAGTGT	Peak1	chr1_2034806_2035012
GCATGACTGATGGAGCTTGG	Peak1	chr1_2034806_2035012
GCCTCGGGAAGGCCTGGGAG	Peak1	chr1_2034806_2035012
GCGTGTGCCTCGGGAAGGCC	Peak1	chr1_2034806_2035012
GCTTCTTTGGGCTGGGGTGG	Peak1	chr1_2034806_2035012
GGAGCTTGGAGGGCTTCTTT	Peak1	chr1_2034806_2035012
GGCTTCTTTGGGCTGGGGTG	Peak1	chr1_2034806_2035012
GGGCTTCTTTGGGCTGGGGT	Peak1	chr1_2034806_2035012
GGGGACACAGGTGCTCCGCA	Peak1	chr1_2034806_2035012
GGGGATGGTTCATCAGCAGC	Peak1	chr1_2034806_2035012
GTACATGACTGCATGACTGA	Peak1	chr1_2034806_2035012
GTCCAGTGGCGCGTGTGCCT	Peak1	chr1_2034806_2035012
GTGCCTCGGGAAGGCCTGGG	Peak1	chr1_2034806_2035012
GTGGCGCGTGTGCCTCGGGA	Peak1	chr1_2034806_2035012
GCACACGTGGCTGGGAGGCC	Peak10	chr1_3692603_3692790
GCCAGGCACACGAAGACACC	Peak10	chr1_3692603_3692790
GCCGATGACAGCTGTGCACC	Peak10	chr1_3692603_3692790
GCTGCAGGACACACCCAGGC	Peak10	chr1_3692603_3692790
GCTGGGCACACGTGGCTGGG	Peak10	chr1_3692603_3692790
GCTGTCATCGGCCCCACACG	Peak10	chr1_3692603_3692790
GCTGTTTGTAGGTCCTTTGA	Peak10	chr1_3692603_3692790
GGCCTGGGCCCAGCCTCAGC	Peak10	chr1_3692603_3692790
GGGCACACGCGCTGGCAGCC	Peak10	chr1_3692603_3692790
GTGTCCTGCAGCTCCTGCTG	Peak10	chr1_3692603_3692790
GAGGAAGCAAGCATGTTTGC	Peak100	chr1_201109450_201109636
GAGGCAGCGCCCAGCAATCA	Peak100	chr1_201109450_201109636
GCAGCATTAGGCATAATCCC	Peak100	chr1_201109450_201109636
GCTCTGCCAGCGCTTTCAAA	Peak100	chr1_201109450_201109636
GGAAGCAAGCATGTTTGCTG	Peak100	chr1_201109450_201109636
GGAGGCAGCGCCCAGCAATC	Peak100	chr1_201109450_201109636
GGCTCTGCCAGCGCTTTCAA	Peak100	chr1_201109450_201109636
GGGATTATGCCTAATGCTGC	Peak100	chr1_201109450_201109636
GGGCTCAGACGTCCTTTGAA	Peak100	chr1_201109450_201109636
GATGAGCTTCTGCAGTATTT	Peak1000	chr3_169049810_169049979
GCAAATCAAAGGCAAACTAA	Peak1000	chr3_169049810_169049979
GTTTAACCACATATCCCTCA	Peak1000	chr3_169049810_169049979
GAAGAGTAGCAAATTGAGAA	Peak1001	chr3_169589071_169589460
GAATCAGGGTGAGGCAGCCA	Peak1001	chr3_169589071_169589460
GACCATGGAGGTGTCCTGGG	Peak1001	chr3_169589071_169589460
GAGTTGGAGTCAGTGCATTT	Peak1001	chr3_169589071_169589460
GCACAGCTGACTAGAGTCTC	Peak1001	chr3_169589071_169589460
GCCCTGTCTAAATCTCCAAA	Peak1001	chr3_169589071_169589460
GGAATCAGGGTGAGGCAGCC	Peak1001	chr3_169589071_169589460
GGAGTTGGAGTCAGTGCATT	Peak1001	chr3_169589071_169589460
GGGTTAGGTGGAAAAGAAGA	Peak1001	chr3_169589071_169589460
GGTGAGGCAGCCAGGGCTGC	Peak1001	chr3_169589071_169589460
GGTGGAAAAGAAGAAGGAAA	Peak1001	chr3_169589071_169589460
GTAGCAAATTGAGAAAGGCC	Peak1001	chr3_169589071_169589460
GTCAGCTGTGCTGCTGTGCA	Peak1001	chr3_169589071_169589460
GTGATGGTGGAATCAGGGTG	Peak1001	chr3_169589071_169589460
GTGGAAAAGAAGAAGGAAAG	Peak1001	chr3_169589071_169589460
GTTCCACTGCTGTCTGTTGC	Peak1001	chr3_169589071_169589460
GTTGGAGTCAGTGCATTTGG	Peak1001	chr3_169589071_169589460
GACGAAACTCAGTTTATTCC	Peak1002	chr3_171506361_171506643
GACAGTAAGACAAAAGAGGA	Peak1004	chr3_181101664_181101849
GGAAATTAGTTAAGTGTGAT	Peak1004	chr3_181101664_181101849
GGTGTTCAGGAGGCAGGCTT	Peak1004	chr3_181101664_181101849
GTCTTACTGTCTTGGTCCCT	Peak1004	chr3_181101664_181101849
GTCTTGGTCCCTGGGGAGAA	Peak1004	chr3_181101664_181101849
GTGATGGGTGTTCAGGAGGC	Peak1004	chr3_181101664_181101849
GTTAAGTGTGATGGGTGTTC	Peak1004	chr3_181101664_181101849
GAGAGAAAGAGCTGAGTTAG	Peak1005	chr3_182966935_182967035
GGGTTCTGTGCAGGTCCCAG	Peak1005	chr3_182966935_182967035
GGTTCTGTGCAGGTCCCAGA	Peak1005	chr3_182966935_182967035
GCAGCATCTGTGAAATATTG	Peak1006	chr3_188692725_188692878
GAAGCAGAAACCACTCCAGG	Peak1007	chr3_194836187_194836432
GAAGGCCTCAGGAGCCACAG	Peak1007	chr3_194836187_194836432
GAGCCACAGTGGAAGTGGTT	Peak1007	chr3_194836187_194836432
GCGTGCTCGGTTTGCCAGGC	Peak1007	chr3_194836187_194836432
GCTGCCGGAGCCAGACGAGG	Peak1007	chr3_194836187_194836432
GGCAAACCGAGCACGCGTGA	Peak1007	chr3_194836187_194836432
GTGCTGCCGGAGCCAGACGA	Peak1007	chr3_194836187_194836432
GAGTGCTCAGCACCGGTGGC	Peak1009	chr3_194838732_194838896
GCATTATCTCTGTCTTCATA	Peak1009	chr3_194838732_194838896
GGAAATGTACTTGTTCCTTG	Peak1009	chr3_194838732_194838896
GTTAAGATAAGAGAAAGCCC	Peak1009	chr3_194838732_194838896
GACCTTATGTCTGCCCTCGG	Peak101	chr1_201110328_201110599
GAGAGATGATGCCAAAGAAC	Peak101	chr1_201110328_201110599
GATGCCAAAGAACGGGACTG	Peak101	chr1_201110328_201110599
GCAGCAGGAAACGTAAAGGC	Peak101	chr1_201110328_201110599
GCCCCAAGACGGCCAAAAGC	Peak101	chr1_201110328_201110599
GTATTCAGAAAACCTGCAGG	Peak101	chr1_201110328_201110599
GAAGCCTAGGTTGGTCCTTG	Peak1010	chr3_194971703_194971985
GACCTGCCCGCGGGGCAGCA	Peak1010	chr3_194971703_194971985
GAGGGAGTCCTCAGATCCCA	Peak1010	chr3_194971703_194971985
GCCAGCAGGTGGGGTGGAGG	Peak1010	chr3_194971703_194971985
GCCCCTGCTGCCCCGCGGGC	Peak1010	chr3_194971703_194971985
GCCTTGGGGAGCCAGCAGGT	Peak1010	chr3_194971703_194971985
GGACCTGCCCGCGGGGCAGC	Peak1010	chr3_194971703_194971985
GGAGCCAGCAGGTGGGGTGG	Peak1010	chr3_194971703_194971985
GGCAGCAGGGGCCTCGTGCG	Peak1010	chr3_194971703_194971985
GGCCTCGTGCGAGGATGACT	Peak1010	chr3_194971703_194971985
GGCTCAAGCCTAGCAGACCA	Peak1010	chr3_194971703_194971985
GGGTCATTCACAAAAGCCAG	Peak1010	chr3_194971703_194971985
GGTCTGCTAGGCTTGAGCCT	Peak1010	chr3_194971703_194971985
GTCTGCTAGGCTTGAGCCTT	Peak1010	chr3_194971703_194971985
GTGCACATTTATGCCGACAG	Peak1010	chr3_194971703_194971985
GTGCACTGGCCAGACGGCCC	Peak1010	chr3_194971703_194971985
GCAGAGCCAGGTGTACAGAG	Peak1011	chr4_323732_323832
GCTGTCTAGAGGGCAGAGCC	Peak1011	chr4_323732_323832
GCACCCGCTACTTAGCAGAC	Peak1012	chr4_323894_323994
GCTACTTAGCAGACCGGGAA	Peak1012	chr4_323894_323994
GACGGGAAGAGAGGAAGCCG	Peak1013	chr4_1043492_1043700
GAGCACCACTGCATCGTCCT	Peak1013	chr4_1043492_1043700
GGACGATGCAGTGGTGCTCA	Peak1013	chr4_1043492_1043700
GGAGGAAGCTGGTGCCCGGC	Peak1013	chr4_1043492_1043700
GGCAGGAGATGCAGCCCAGG	Peak1013	chr4_1043492_1043700
GAGCCGCAGGGTCTGTGCTC	Peak1014	chr4_4408444_4408544
GCCAGTGAGCTAGAGCCGCA	Peak1014	chr4_4408444_4408544
GCGGCTCTAGCTCACTGGCC	Peak1014	chr4_4408444_4408544
GCTATTCACAGGCTGGAGCC	Peak1014	chr4_4408444_4408544
GGAGCCAGGTGCCAGACTCC	Peak1014	chr4_4408444_4408544
GGCCAGTGAGCTAGAGCCGC	Peak1014	chr4_4408444_4408544
GGGCCGGAGCACAGACCCTG	Peak1014	chr4_4408444_4408544
GCCGCAGTGCCCACAGGGAA	Peak1015	chr4_4408635_4408820
GCCTTTCCCTGTGGGCACTG	Peak1015	chr4_4408635_4408820
GCGCAGAGCTGTGATGAAGC	Peak1015	chr4_4408635_4408820
GCGCAGCCGTCTGAGGCACG	Peak1015	chr4_4408635_4408820
GCGCTCTGCTGCCCTGGCCC	Peak1015	chr4_4408635_4408820
GCAGCAGTCTAAAATGTGGC	Peak1016	chr4_6260575_6260775
GCTGCCTCTGAGGCCCCTCT	Peak1016	chr4_6260575_6260775
GCTGTGCAAGTTCCAAAGCA	Peak1016	chr4_6260575_6260775
GGTTATCTTGTATGACCAGA	Peak1016	chr4_6260575_6260775
GTGGCAGGTTGATAACAAGC	Peak1016	chr4_6260575_6260775
GCTCCACGTTGCCATAGAGA	Peak1017	chr4_6262297_6262543
GTTCCCTCTCCCACCAGCTC	Peak1017	chr4_6262297_6262543
GAACCTGTACCAGTACCAGT	Peak1018	chr4_6290382_6290482
GATGGTGAGCCTTGGCAGGC	Peak1018	chr4_6290382_6290482
GCTCCGACTGGTACTGGTAC	Peak1018	chr4_6290382_6290482
GAAGCTGCTTCGCCGGTGCT	Peak1019	chr4_6290681_6290858
GACGGCCCTGCTTCGCGGCG	Peak1019	chr4_6290681_6290858
GAGGACCAGCCAGTCCACAG	Peak1019	chr4_6290681_6290858
GAGTTCTTCATCCGTGTCGC	Peak1019	chr4_6290681_6290858
GCAGCTTCACAGCCTCGCGA	Peak1019	chr4_6290681_6290858
GCTGCTTCGCCGGTGCTTGG	Peak1019	chr4_6290681_6290858
GCTGGTCCTCGCCGCGAAGC	Peak1019	chr4_6290681_6290858
GGGGAAGCACTACCTGCAGT	Peak1019	chr4_6290681_6290858
GGACACAGCGCAGCTGAAAC	Peak102	chr1_201271121_201271319
GGCTCGAAAGCCACCACCTG	Peak102	chr1_201271121_201271319
GGGAGAAGTGCTCCAACCCG	Peak102	chr1_201271121_201271319
GGTTCTGGATGAGCCGCAGG	Peak102	chr1_201271121_201271319
GTGCTCCAACCCGCGGCACC	Peak102	chr1_201271121_201271319
GTGTCCTCAGTCAGCTCTCA	Peak102	chr1_201271121_201271319
GAGATCGGGGCAGACCCAAG	Peak1020	chr4_8042916_8043089
GATCGGGGCAGACCCAAGTG	Peak1020	chr4_8042916_8043089
GATGCCATCTGGCCTGATCG	Peak1020	chr4_8042916_8043089
GCCAGATGGCATCCCTGTTC	Peak1020	chr4_8042916_8043089
GCCCACCAACATCCCTTGGC	Peak1020	chr4_8042916_8043089
GCCCCGATCTCTCCTGTGGA	Peak1020	chr4_8042916_8043089
GCCTGCCAAGGGATGTTGGT	Peak1020	chr4_8042916_8043089
GGACGCCTGCCAAGGGATGT	Peak1020	chr4_8042916_8043089
GGCATCCCTGTTCTGGGTAG	Peak1020	chr4_8042916_8043089
GGGAAGGAGTTCCCGTCCAC	Peak1020	chr4_8042916_8043089
GGGTGAGCACAAGCTCCCTG	Peak1020	chr4_8042916_8043089
GTCTGCCCCGATCTCTCCTG	Peak1020	chr4_8042916_8043089
GCTCTTGTCACCAGATAATT	Peak1021	chr4_8046549_8046710
GCTGTGTACACACCACTGTG	Peak1021	chr4_8046549_8046710
GGAACCTGTCCCCAATTATC	Peak1021	chr4_8046549_8046710
GGCTCTTGTCACCAGATAAT	Peak1021	chr4_8046549_8046710
GTCACCAGATAATTGGGGAC	Peak1021	chr4_8046549_8046710
GTCTGGCAAGCCCCAACTGT	Peak1021	chr4_8046549_8046710
GTTTGACCCGGCAATTCCCC	Peak1021	chr4_8046549_8046710
GAGTTATTTCCCATGTTGCA	Peak1022	chr4_8055916_8056133
GATGCTCAGGGCCGCTTGGA	Peak1022	chr4_8055916_8056133
GCACTAACTCCAGCACAGAG	Peak1022	chr4_8055916_8056133
GCTCAGGGCCGCTTGGAGGG	Peak1022	chr4_8055916_8056133
GGAAACGCAGAGGAGGGAGC	Peak1022	chr4_8055916_8056133
GGATGCTCAGGGCCGCTTGG	Peak1022	chr4_8055916_8056133
GGGCCTGTGTGGAAACGCAG	Peak1022	chr4_8055916_8056133
GAGAGGGCTTTGCCATCCCA	Peak1023	chr4_10966041_10966236
GAGGGCTTTGCCATCCCAGG	Peak1023	chr4_10966041_10966236
GATGCTGGTTATATTGGCCG	Peak1023	chr4_10966041_10966236
GCCGAGGGAAGCTTGCTGAT	Peak1023	chr4_10966041_10966236
GCTTGCTGATCGGAAAACAC	Peak1023	chr4_10966041_10966236
GGGAGGGCACATGAGCTGGC	Peak1023	chr4_10966041_10966236
GTAGTTATTCTTAGAGATGC	Peak1023	chr4_10966041_10966236
GCATTGTACTGTGACTAAGC	Peak1024	chr4_15834508_15834608
GATCAGTATCTCAAGTGTGG	Peak1025	chr4_17490860_17491193
GATCTAAGACCTACTCTAGA	Peak1025	chr4_17490860_17491193
GATGTGATCTCTAGAACAAA	Peak1025	chr4_17490860_17491193
GCAGAACCTATGGTCTTAAC	Peak1025	chr4_17490860_17491193
GCCACAGACCCACAGAGGAC	Peak1025	chr4_17490860_17491193
GCCCGTCCTCTGTGGGTCTG	Peak1025	chr4_17490860_17491193
GCTGAGCCACAGACCCACAG	Peak1025	chr4_17490860_17491193
GTGATCTCTAGAACAAAAGG	Peak1025	chr4_17490860_17491193
GATCCCTGCCCACAGGGAGC	Peak1026	chr4_17491475_17491575
GGCTGTCACCTTGACCCTCT	Peak1026	chr4_17491475_17491575
GTTTACACAGAGGCACTACT	Peak1026	chr4_17491475_17491575
GAATATACACAGGGTAGGGT	Peak1027	chr4_22609181_22609375
GACTAGTAGGTAATGGGTGG	Peak1027	chr4_22609181_22609375
GAGACTTGGGCTATGCCTAC	Peak1027	chr4_22609181_22609375
GCTTTGGACTAGTAGGTAAT	Peak1027	chr4_22609181_22609375
GGAATATACACAGGGTAGGG	Peak1027	chr4_22609181_22609375
GGACTAGTAGGTAATGGGTG	Peak1027	chr4_22609181_22609375
GGCAGAGGGGAGGGAGCTAG	Peak1027	chr4_22609181_22609375
GGCTTTGGACTAGTAGGTAA	Peak1027	chr4_22609181_22609375
GGGAGCTAGGGGCACACCAA	Peak1027	chr4_22609181_22609375
GTAGGCATAGCCCAAGTCTC	Peak1027	chr4_22609181_22609375
GTCCAAAGCCACTTGAGCCA	Peak1027	chr4_22609181_22609375
GGATCTCAAGGGGCAGGATT	Peak1028	chr4_22671174_22671346
GGTGGTTGGGGTAGTTATTT	Peak1028	chr4_22671174_22671346
GCAGCTAATATGGGTATGCT	Peak1029	chr4_22671383_22671483
GTTAGAATTGCAGCTAATAT	Peak1029	chr4_22671383_22671483
GAGAAAAGCAGCTCTAGACC	Peak103	chr1_201271704_201271904
GAGACATGCCAGGGCCCTGG	Peak103	chr1_201271704_201271904
GATCTGTAGAGACACAGGTG	Peak103	chr1_201271704_201271904
GCTCAGGCACGGGGAGGGGA	Peak103	chr1_201271704_201271904
GCTGAAAACAAAATCAGCTC	Peak103	chr1_201271704_201271904
GCTTCCGTAGAGACATGCCA	Peak103	chr1_201271704_201271904
GGATCTGTAGAGACACAGGT	Peak103	chr1_201271704_201271904
GGCGGGAGGGGAGGGGCTCC	Peak103	chr1_201271704_201271904
GGCTTCCGTAGAGACATGCC	Peak103	chr1_201271704_201271904
GGGATCTGTAGAGACACAGG	Peak103	chr1_201271704_201271904
GGGCGGGAGGGGAGGGGCTC	Peak103	chr1_201271704_201271904
GTAGAGACATGCCAGGGCCC	Peak103	chr1_201271704_201271904
GAGGAGATGGCAGAGCCCCA	Peak1030	chr4_24842829_24843263
GATCCAGCTATTACCAACTT	Peak1030	chr4_24842829_24843263
GCTTAAGTGCAGTCAGCTGA	Peak1030	chr4_24842829_24843263
GGACGTCACCGCAGAGGAGA	Peak1030	chr4_24842829_24843263
GGGCTCTGCCATCTCCTCTG	Peak1030	chr4_24842829_24843263
GTCTAAGGACGTCACCGCAG	Peak1030	chr4_24842829_24843263
GTTAAATCTCAGGGCTGGAC	Peak1030	chr4_24842829_24843263
GTTTAATGTGCATACAATAT	Peak1030	chr4_24842829_24843263
GCCTGGAACAAATCCTGCAA	Peak1031	chr4_24975640_24975778
GGCTGACCTAGTTAGACAGT	Peak1031	chr4_24975640_24975778
GTCAAAAGGAGCTGTGCCCG	Peak1031	chr4_24975640_24975778
GTGCGGCCCACTGTCTAACT	Peak1031	chr4_24975640_24975778
GAAGAGGTGGTGCCTGTAAG	Peak1032	chr4_24976538_24976638
GATGATGCCAATGTGATAGT	Peak1032	chr4_24976538_24976638
GCCAATGTGATAGTAGGAAG	Peak1032	chr4_24976538_24976638
GGTGCCTGTAAGAGGTGATG	Peak1032	chr4_24976538_24976638
GGCTGGAAAGTCCAAGATCA	Peak1033	chr4_24976753_24976916
GAAAGGAGAGGAGAGGGGAG	Peak1034	chr4_24977105_24977445
GAAAGTAAACACAGTGTCAA	Peak1034	chr4_24977105_24977445
GACTGGTTCAGGGATGGGCA	Peak1034	chr4_24977105_24977445
GAGAGAAAAGATGAAAGGAG	Peak1034	chr4_24977105_24977445
GAGAGAGGAAGCATACGTCC	Peak1034	chr4_24977105_24977445
GAGAGGAAGCATACGTCCTG	Peak1034	chr4_24977105_24977445
GAGAGGGAAGGGGAGGAGAG	Peak1034	chr4_24977105_24977445
GAGGGAAAGGAAGGAAAAGT	Peak1034	chr4_24977105_24977445
GGAAGCATACGTCCTGGGGA	Peak1034	chr4_24977105_24977445
GGAAGGAGAGAAAAGATGAA	Peak1034	chr4_24977105_24977445
GGAGCTCATTGATGGGGCTT	Peak1034	chr4_24977105_24977445
GGAGGAGAGGGGACAGGAGA	Peak1034	chr4_24977105_24977445
GGGAAGAGAGGAGAGGGAAG	Peak1034	chr4_24977105_24977445
GGGACAGGAGAGGGAAAGGA	Peak1034	chr4_24977105_24977445
GGGAGGAGAGGGGACAGGAG	Peak1034	chr4_24977105_24977445
GGGGAAGAGAGGAGAGGGAA	Peak1034	chr4_24977105_24977445
GGGGAAGGAGCTCATTGATG	Peak1034	chr4_24977105_24977445
GGGGAGGGGAAGAGAGGAGA	Peak1034	chr4_24977105_24977445
GTGTTTACTTTCATGGTTGC	Peak1034	chr4_24977105_24977445
GTTACTTCTCCTTTCTTTGG	Peak1034	chr4_24977105_24977445
GTTTACTTTCATGGTTGCAG	Peak1034	chr4_24977105_24977445
GAGCTGACTGGTGATTTCCC	Peak1035	chr4_25971869_25972142
GAGGCCCAGGGCTGCCAAGT	Peak1035	chr4_25971869_25972142
GATCAACTGAAATGTGTAGG	Peak1035	chr4_25971869_25972142
GCCCGGGCTGTCTGTGGTAG	Peak1035	chr4_25971869_25972142
GGAAGCTGTAGAGAGCTGAC	Peak1035	chr4_25971869_25972142
GGATCAACTGAAATGTGTAG	Peak1035	chr4_25971869_25972142
GGGCCCCACTTGGCAGCCCT	Peak1035	chr4_25971869_25972142
GTTGAGAAGGCAGCTCAGCC	Peak1035	chr4_25971869_25972142
GAAACTGGGACTTGATCCAG	Peak1036	chr4_25972474_25972616
GCAGGAAGACCTGATGTTGT	Peak1036	chr4_25972474_25972616
GCCACCTCAGAGAGTCAGAA	Peak1036	chr4_25972474_25972616
GCCTTTCTGACTCTCTGAGG	Peak1036	chr4_25972474_25972616
GCTGCCTTTCTGACTCTCTG	Peak1036	chr4_25972474_25972616
GGACTTGATCCAGAGGAGGC	Peak1036	chr4_25972474_25972616
GGCAGGAAGACCTGATGTTG	Peak1036	chr4_25972474_25972616
GTAAACATTCCCACAACATC	Peak1036	chr4_25972474_25972616
GTTCTAACCGCACCATGTCC	Peak1036	chr4_25972474_25972616
GAAATTTGACTATTTACCTT	Peak1037	chr4_26090256_26090469
GCCCACATCCTGAGCAAAAC	Peak1037	chr4_26090256_26090469
GCTCAGGATGTGGGCAGATG	Peak1037	chr4_26090256_26090469
GGAATTCTTCACATACCCAG	Peak1037	chr4_26090256_26090469
GAAAAGGGGAGTGATGGGCT	Peak1038	chr4_26127850_26128084
GATGGGCTAGGAGGAAGTTG	Peak1038	chr4_26127850_26128084
GCAGTGTCTGTCTCCTTCCT	Peak1038	chr4_26127850_26128084
GCTAGGAGGAAGTTGGGGTT	Peak1038	chr4_26127850_26128084
GGCTAGGAGGAAGTTGGGGT	Peak1038	chr4_26127850_26128084
GTAGTCCCTGCCTCTTATGG	Peak1038	chr4_26127850_26128084
GTGATGGGCTAGGAGGAAGT	Peak1038	chr4_26127850_26128084
GAAGGCGCCTTACTGGTCCT	Peak1039	chr4_26205959_26206172
GACACCTCTTTCATTGGTGT	Peak1039	chr4_26205959_26206172
GAGGTGTCGCCTTTGAAGAC	Peak1039	chr4_26205959_26206172
GCCCTTCTAGCCATCCGCTG	Peak1039	chr4_26205959_26206172
GCCTTACTGGTCCTTGGGGA	Peak1039	chr4_26205959_26206172
GCTGCATAGACCCGTCCCCA	Peak1039	chr4_26205959_26206172
GGCCCTTCTAGCCATCCGCT	Peak1039	chr4_26205959_26206172
GTAGTCCCATCCCCAGCGGA	Peak1039	chr4_26205959_26206172
GTGTAACTGCACAGATGCTT	Peak1039	chr4_26205959_26206172
GTTCAGGAAATGATTTGCAG	Peak1039	chr4_26205959_26206172
GCCCCTCCCCTCTGGACCTG	Peak104	chr1_201675605_201675849
GCGGTTTCAGGGTGGTGGTG	Peak104	chr1_201675605_201675849
GGCGGTTTCAGGGTGGTGGT	Peak104	chr1_201675605_201675849
GGGGCCTGCCCAGTGTCACC	Peak104	chr1_201675605_201675849
GTGGGAACCAACAGAAGGAA	Peak104	chr1_201675605_201675849
GAGACCAGAAGCCTGTCGCA	Peak1040	chr4_26782252_26782476
GCCTAGTAAAACTTCACCTA	Peak1040	chr4_26782252_26782476
GGCTTCTGGTCTCCTGCAAC	Peak1040	chr4_26782252_26782476
GGTAGCTGACTAGCCAATTG	Peak1040	chr4_26782252_26782476
GGGTACTCAGGAGCAGTGAA	Peak1041	chr4_36510128_36510289
GGTACTCAGGAGCAGTGAAA	Peak1041	chr4_36510128_36510289
GTGCTGTGGTTGGAGCTTCC	Peak1041	chr4_36510128_36510289
GACTGCAGAGCAGCCTGGTT	Peak1042	chr4_38073553_38073826
GCAGCCTGGTTAGGAGCCCT	Peak1042	chr4_38073553_38073826
GCCCAGACCCGCCCAACCCC	Peak1042	chr4_38073553_38073826
GCCCTGGGGTTGGGCGGGTC	Peak1042	chr4_38073553_38073826
GGTAGCAGGCCCAAAGTCCC	Peak1042	chr4_38073553_38073826
GTAGCAGGCCCAAAGTCCCA	Peak1042	chr4_38073553_38073826
GTCTCCCTCCCCTGGGACTT	Peak1042	chr4_38073553_38073826
GTTCCTTCCTTTGTGAGATA	Peak1042	chr4_38073553_38073826
GTTGGGCGGGTCTGGGCTGC	Peak1042	chr4_38073553_38073826
GACAGGCATATTTATAAAGT	Peak1044	chr4_38087038_38087245
GAGGGGCTGCTCTACCTCAT	Peak1044	chr4_38087038_38087245
GCGGAGGCTGAGCCGAAGGA	Peak1044	chr4_38087038_38087245
GGAGGGGCTGCTCTACCTCA	Peak1044	chr4_38087038_38087245
GGCTTGGCTCAGTGCAGCGG	Peak1044	chr4_38087038_38087245
GGTCTCTACAGTTGGGCAGT	Peak1044	chr4_38087038_38087245
GTGCCTGTGGTCTCTACAGT	Peak1044	chr4_38087038_38087245
GAAGCAGATTCATTTCCCTC	Peak1045	chr4_38754067_38754445
GAATGGTGTCGGGTAGGAGG	Peak1045	chr4_38754067_38754445
GAGCATTTGGGACGCCACAG	Peak1045	chr4_38754067_38754445
GGGTAACCGCTCTTCCTGAA	Peak1045	chr4_38754067_38754445
GTCAATTCCTCAATTCATGA	Peak1045	chr4_38754067_38754445
GTCGCCTCCCACAGTCCTGA	Peak1045	chr4_38754067_38754445
GAACCTTGGGTTACCACAAG	Peak1046	chr4_38787643_38787831
GACCTGGAGCAGTGGCTTCT	Peak1046	chr4_38787643_38787831
GAGAACCTTGGGTTACCACA	Peak1046	chr4_38787643_38787831
GGAAACACAGCAGCACAGCC	Peak1046	chr4_38787643_38787831
GGGTTACCACAAGGGGATGG	Peak1046	chr4_38787643_38787831
GTTCATTGCAACATATATGA	Peak1046	chr4_38787643_38787831
GACTCCACTATCAGTCTTAT	Peak1047	chr4_41648935_41649164
GACTCCTATAAGACTGATAG	Peak1047	chr4_41648935_41649164
GCTGAACTCCAGGGAGTGGA	Peak1047	chr4_41648935_41649164
GCTTCTTTCCATCCACTCCC	Peak1047	chr4_41648935_41649164
GTATTAACAACAGCAATTGA	Peak1047	chr4_41648935_41649164
GTCATAGGTCTCTGGAGATT	Peak1047	chr4_41648935_41649164
GTACTTTCTCTTATATCAGG	Peak1048	chr4_41649491_41649665
GTCAAAAGAACTTAAGACAA	Peak1048	chr4_41649491_41649665
GTTCCAGACTGAAGAACTTG	Peak1048	chr4_41649491_41649665
GACTCATTCTCGGGAGACTT	Peak1049	chr4_42031739_42031951
GATGCGTTATACTTCATCAC	Peak1049	chr4_42031739_42031951
GTCTCCAAGGACTCATTCTC	Peak1049	chr4_42031739_42031951
GTCTCCCGAGAATGAGTCCT	Peak1049	chr4_42031739_42031951
GTGTTTCCTGTTCAGTGCAC	Peak1049	chr4_42031739_42031951
GCCGGCCTGAGCTTAGTCTT	Peak105	chr1_201680513_201680705
GCTGAGTCTGTGGGCTGAGG	Peak105	chr1_201680513_201680705
GCTGCTTGACTGTCTTGTCA	Peak105	chr1_201680513_201680705
GCTTGACTGTCTTGTCAGGG	Peak105	chr1_201680513_201680705
GGGCTGAGGAGGGACTGAGG	Peak105	chr1_201680513_201680705
GTGGGCTGAGGAGGGACTGA	Peak105	chr1_201680513_201680705
GCAGCCCACTGCCTGCCTGC	Peak1050	chr4_42152699_42152799
GCTCCCTGCAGGCAGGCAGT	Peak1050	chr4_42152699_42152799
GGTTGCGAGGCCACAGCCTG	Peak1050	chr4_42152699_42152799
GAACTGAGAGCCAGCCAGCA	Peak1051	chr4_42153098_42153401
GAGCGGCCGCCGCTATCCCC	Peak1051	chr4_42153098_42153401
GCGGCCGCTCGGGAAGAAGC	Peak1051	chr4_42153098_42153401
GCTCGGGCGTGGTCCGGAGT	Peak1051	chr4_42153098_42153401
GCTTCTCGGGCCGCCCCGCT	Peak1051	chr4_42153098_42153401
GGAAGAAGCTGGAGCTTCTC	Peak1051	chr4_42153098_42153401
GGGAAGAAGCTGGAGCTTCT	Peak1051	chr4_42153098_42153401
GGGGATAGCGGCGGCCGCTC	Peak1051	chr4_42153098_42153401
GTAGTACGAGGGCGTCCCAG	Peak1051	chr4_42153098_42153401
GTGAGAGTGCATCAAAGAGG	Peak1051	chr4_42153098_42153401
GTGGCGAAGAAAGCACTAGA	Peak1051	chr4_42153098_42153401
GACGGCGCGCGCCTAACAGG	Peak1052	chr4_42153430_42153530
GAGAATCCTCTCGAAGTTTC	Peak1052	chr4_42153430_42153530
GCGCCTAACAGGTGGCTCCG	Peak1052	chr4_42153430_42153530
GCGCGCGCCGTCGGAAGCCC	Peak1052	chr4_42153430_42153530
GAACGTCTTGAGGACGCTGT	Peak1053	chr4_42153935_42154124
GACGGCGGCGTGCGGCGCGA	Peak1053	chr4_42153935_42154124
GACGTTCCCCAGCAAGAGAC	Peak1053	chr4_42153935_42154124
GCACGTGCGGCAGCTCCACC	Peak1053	chr4_42153935_42154124
GCCAGCGCCGGTCTCTTGCT	Peak1053	chr4_42153935_42154124
GCGCTACGAGCGACCCACCC	Peak1053	chr4_42153935_42154124
GCGGCGTGCGGCGCGAAGGG	Peak1053	chr4_42153935_42154124
GCGTGCGGCGCGAAGGGCGG	Peak1053	chr4_42153935_42154124
GCTGCGCTGCTTGTAGATTT	Peak1053	chr4_42153935_42154124
GCTGCTGCTGATGGAGACGG	Peak1053	chr4_42153935_42154124
GGCCAGCGCCGGTCTCTTGC	Peak1053	chr4_42153935_42154124
GGTGGAGCTGCCGCACGTGC	Peak1053	chr4_42153935_42154124
GGTGGGTCGCTCGTAGCGCT	Peak1053	chr4_42153935_42154124
GTGCGGCAGCTCCACCAGGG	Peak1053	chr4_42153935_42154124
GTGCGGCGCGAAGGGCGGCG	Peak1053	chr4_42153935_42154124
GAAGCCTCGAGTCCACATCT	Peak1054	chr4_42154507_42154650
GAAGGTGGGGATCCGGGATC	Peak1054	chr4_42154507_42154650
GAGACCCAGATGTGGACTCG	Peak1054	chr4_42154507_42154650
GCGAGGACCTGGAGGACGCC	Peak1054	chr4_42154507_42154650
GCGCCTCCGACGGGGAGCGG	Peak1054	chr4_42154507_42154650
GGGAACTGGTGAAGAAGGTG	Peak1054	chr4_42154507_42154650
GGGGATCCGGGATCTGGCTA	Peak1054	chr4_42154507_42154650
GGTGAAGAAGGTGGGGATCC	Peak1054	chr4_42154507_42154650
GTCTCGCCGTAGCCAGATCC	Peak1054	chr4_42154507_42154650
GCACAAACCACTTCATCCCT	Peak1055	chr4_42634807_42635054
GGGATGAAGTGGTTTGTGCA	Peak1055	chr4_42634807_42635054
GTCAGATTATTAGCCTAGCC	Peak1055	chr4_42634807_42635054
GTGGTTTGTGCAGGGTCATG	Peak1055	chr4_42634807_42635054
GAAATCTATTTCTCAGTTCT	Peak1056	chr4_42718916_42719253
GACTGACAGACCTGTGGAGC	Peak1056	chr4_42718916_42719253
GGACTGACAGACCTGTGGAG	Peak1056	chr4_42718916_42719253
GGAGCGGGTGCTGGCCCAGC	Peak1056	chr4_42718916_42719253
GGCTAGGAAGTCCAAGGTCA	Peak1056	chr4_42718916_42719253
GGGATGGGTGGGACTTGATG	Peak1056	chr4_42718916_42719253
GGTGCTGGCCCAGCTGGTGC	Peak1056	chr4_42718916_42719253
GGTGCTGGGGTCCCTAGGGA	Peak1056	chr4_42718916_42719253
GTGCTGGCCCAGCTGGTGCT	Peak1056	chr4_42718916_42719253
GTGCTGGGGTCCCTAGGGAT	Peak1056	chr4_42718916_42719253
GAAGCATAATCCCTAGGGGA	Peak1058	chr4_68343078_68343330
GCATAATCCCTAGGGGAAGG	Peak1058	chr4_68343078_68343330
GGAGGAGAGCACCACATCAA	Peak1058	chr4_68343078_68343330
GGCACTTCCCAGTACCAGCC	Peak1058	chr4_68343078_68343330
GTGCTCTCCTCCTTCCCCTA	Peak1058	chr4_68343078_68343330
GTGTCAGAGGAGACATCTGG	Peak1058	chr4_68343078_68343330
GTTCAGATTCATTTGTTCCA	Peak1058	chr4_68343078_68343330
GACTCAACATTTCTAACTAT	Peak106	chr1_210547411_210547764
GTAGGCACCATCGGCGTACT	Peak106	chr1_210547411_210547764
GTGCGAACTGTAGGCACCAT	Peak106	chr1_210547411_210547764
GAAGTCTTTCAAGTTTGTGT	Peak1060	chr4_74469671_74469789
GTGATACAAATGAACCTCAG	Peak1060	chr4_74469671_74469789
GTGTGATACAAATGAACCTC	Peak1060	chr4_74469671_74469789
GAACCGGGAAGAAACCACAC	Peak1061	chr4_76106069_76106266
GGAAGACCCCTGTGGGCTCT	Peak1061	chr4_76106069_76106266
GGACTTCTGTAAGACAAAGT	Peak1061	chr4_76106069_76106266
GGAGGGCTGCCAGAGGAACC	Peak1061	chr4_76106069_76106266
GGGAAGAAACCACACAGGGA	Peak1061	chr4_76106069_76106266
GGGAGGGCTGCCAGAGGAAC	Peak1061	chr4_76106069_76106266
GTTTCCCCGACAGAAATCAG	Peak1061	chr4_76106069_76106266
GCTGTGTCATGCAGGCCACC	Peak1062	chr4_76106367_76106559
GCTTTCACCCATTTCCCTGG	Peak1062	chr4_76106367_76106559
GGCCAGTGGAATTCTGCCCC	Peak1062	chr4_76106367_76106559
GGGTGAAAGCTGGCAGTTAT	Peak1062	chr4_76106367_76106559
GGGTGTGGTTCTCAGGCCAG	Peak1062	chr4_76106367_76106559
GCTATCATTCCAAAGGAGGA	Peak1063	chr4_76924659_76924759
GCATAATATCTCTCAGTAGG	Peak1064	chr4_77099658_77099858
GCCACTTCCTGAGATGGGGA	Peak1065	chr4_77226394_77226561
GCTGACTGGTGGTTTGAAAG	Peak1065	chr4_77226394_77226561
GGGAAGGTGGGGAGAGTAGT	Peak1065	chr4_77226394_77226561
GGGAGTTAGGTGGGGAGTTC	Peak1065	chr4_77226394_77226561
GGTGGGGAGAGTAGTAGGTT	Peak1065	chr4_77226394_77226561
GGTGGTTTGAAAGTGGCCTG	Peak1065	chr4_77226394_77226561
GGTTGCCACTTCCTGAGATG	Peak1065	chr4_77226394_77226561
GTAGGTTTGGGGAGTTAGGT	Peak1065	chr4_77226394_77226561
GTGGGGAGAGTAGTAGGTTT	Peak1065	chr4_77226394_77226561
GTGGTTGCCACTTCCTGAGA	Peak1065	chr4_77226394_77226561
GTGGTTTGAAAGTGGCCTGT	Peak1065	chr4_77226394_77226561
GCTGAGTAGGAGTCCCAAGA	Peak1066	chr4_86412705_86412874
GTGCACACAGAACCCCTCTT	Peak1066	chr4_86412705_86412874
GTGTGCACTAGGTACTTCCT	Peak1066	chr4_86412705_86412874
GAAGTCTTGAGAAGATGCCG	Peak1067	chr4_89149007_89149287
GGGACAGTGCTTTGTACAGT	Peak1067	chr4_89149007_89149287
GAGGCAGCCATAATTCCCCT	Peak1068	chr4_89801913_89802078
GGACCTGAATGAGGCAGCAG	Peak1068	chr4_89801913_89802078
GGCTGCGTGGGAGGTGAGTG	Peak1068	chr4_89801913_89802078
GGGCACAGTGGGAGTGAGAC	Peak1068	chr4_89801913_89802078
GGGGAAAAGCCAGCAGTTAC	Peak1068	chr4_89801913_89802078
GAGGGAAGATCTGGAGCTCA	Peak1069	chr4_89802392_89802683
GCCACATCCTTAGGGGAAGG	Peak1069	chr4_89802392_89802683
GATAGCTGCTCATGGTACTG	Peak107	chr1_210780854_210781031
GATCTAAGTGTAGCCTGGAG	Peak107	chr1_210780854_210781031
GCATAAAGAGTCAAGGCACA	Peak107	chr1_210780854_210781031
GCCTTGACTCTTTATGCTCA	Peak107	chr1_210780854_210781031
GGCCACAGCTGTCACATCCT	Peak107	chr1_210780854_210781031
GGCTTATTCAGTAGTCCCAA	Peak107	chr1_210780854_210781031
GTGATAGCTGCTCATGGTAC	Peak107	chr1_210780854_210781031
GAACTGTCAGCTGACATCCA	Peak1070	chr4_90211940_90212182
GCTTCTGTGAGTATGAGGTT	Peak1070	chr4_90211940_90212182
GTCTCAAACGTCTCTTTAAA	Peak1070	chr4_90211940_90212182
GAACAGAGCCTCTAGCACCC	Peak1071	chr4_101379957_101380205
GCTAGAGGCTCTGTTCAGCA	Peak1071	chr4_101379957_101380205
GCTCTGTTCAGCATGGAGAG	Peak1071	chr4_101379957_101380205
GGGAAGGCTAAATGTTTATG	Peak1071	chr4_101379957_101380205
GAGCAAAGGCAAATACAGAA	Peak1072	chr4_102793722_102793883
GGAGAAACACAGTGTGGGCT	Peak1072	chr4_102793722_102793883
GGGCTAGGACAACTCCCTCG	Peak1072	chr4_102793722_102793883
GAGTACATTGCACTGAAAGC	Peak1073	chr4_103090572_103090731
GCAATGTACTCTGCTTCCCC	Peak1073	chr4_103090572_103090731
GCATATGGTGCCTTGTGGTA	Peak1073	chr4_103090572_103090731
GCCACATTAGGTAGAAATGC	Peak1073	chr4_103090572_103090731
GGTAGAAATGCAGGGGAGGA	Peak1073	chr4_103090572_103090731
GTAGAAATGCAGGGGAGGAA	Peak1073	chr4_103090572_103090731
GAAAAGAACCACCACAGAGG	Peak1074	chr4_103495515_103495749
GAGACACAGTTAAATATTGG	Peak1074	chr4_103495515_103495749
GAGATACACTCAGAGATCAC	Peak1074	chr4_103495515_103495749
GAGGAGACACAGTTAAATAT	Peak1074	chr4_103495515_103495749
GTGAGGAAATATGTCAAAGC	Peak1074	chr4_103495515_103495749
GTTTGCGGTTTCTTCCTTTC	Peak1074	chr4_103495515_103495749
GAGGTTTCAGACGACCGTAC	Peak1075	chr4_109298219_109298465
GCTGACCACATTAGAGTCAC	Peak1075	chr4_109298219_109298465
GGAACTGTCTTATGCAAAGT	Peak1075	chr4_109298219_109298465
GTTGAAAGCTCATGCCAGTA	Peak1075	chr4_109298219_109298465
GATGCAGTTTCGGTTTCCCA	Peak1076	chr4_109337795_109338000
GCTAACAGAGGGAGAGCTCA	Peak1076	chr4_109337795_109338000
GCTCTCCAGAGACCCTGTCT	Peak1076	chr4_109337795_109338000
GGAGAGCTCAGGGTGGTTTA	Peak1076	chr4_109337795_109338000
GGGAGAGCTCAGGGTGGTTT	Peak1076	chr4_109337795_109338000
GGGCCTGGGTTGCAGACTTG	Peak1076	chr4_109337795_109338000
GGGTCTCTGGAGAGCTGAGG	Peak1076	chr4_109337795_109338000
GTTTCGGTTTCCCATGGCTG	Peak1076	chr4_109337795_109338000
GACTGCGCTGTCATAGAGCC	Peak1077	chr4_111393822_111393922
GCAAAACCCAAGGTGCATCC	Peak1077	chr4_111393822_111393922
GAGTCAGACACCGAGCAGCT	Peak1078	chr4_119487335_119487540
GCCAAATGCTCCAAGCTGCT	Peak1078	chr4_119487335_119487540
GCTGCTCGGTGTCTGACTCC	Peak1078	chr4_119487335_119487540
GAAGGGGAATACAGCCGTTA	Peak1079	chr4_124180491_124180734
GAAGTCTGTCACCAGCTGGA	Peak1079	chr4_124180491_124180734
GGAAGGGGAATACAGCCGTT	Peak1079	chr4_124180491_124180734
GGCTATGGCCCTCATTGTCC	Peak1079	chr4_124180491_124180734
GGCTGTATTCCCCTTCCAGC	Peak1079	chr4_124180491_124180734
GTCAAGAAGCCAGGACAATG	Peak1079	chr4_124180491_124180734
GTTAGGGAGCAGCCTCTGAG	Peak1079	chr4_124180491_124180734
GACCCCACCAGGCTGGTTTG	Peak108	chr1_214628412_214628631
GCTAGTTGAAATGAGAGCCT	Peak108	chr1_214628412_214628631
GGGTCTCAGCTGGGCTTGAC	Peak108	chr1_214628412_214628631
GTGAGGCACTGTGTAGACGT	Peak108	chr1_214628412_214628631
GGCCCAAATCTAGAACTGGA	Peak1080	chr4_124570145_124570344
GTCCAAAGAGTATGTTTGGA	Peak1080	chr4_124570145_124570344
GTCCTTCCAAACATACTCTT	Peak1080	chr4_124570145_124570344
GTGGTAGCTTATTGTATCAG	Peak1080	chr4_124570145_124570344
GCTAGAAACTACTGGGCCCT	Peak1081	chr4_124570485_124570692
GGAGTATGCTAGAAACTACT	Peak1081	chr4_124570485_124570692
GGCCTCTGGAGTAGAGAAAG	Peak1081	chr4_124570485_124570692
GCAGAGTACAAAATTGTAGT	Peak1082	chr4_124570693_124570900
GCATGATTGAATACCCTGTC	Peak1083	chr4_124897529_124897703
GGCTGTTTCCACTTCCAGTC	Peak1083	chr4_124897529_124897703
GATGTGCCTGTTGCCACTGG	Peak1084	chr4_124907483_124907583
GCTCTTCATTTCACTCCCCA	Peak1085	chr4_124940080_124940270
GGAACTGTGCTGTCAACAAC	Peak1085	chr4_124940080_124940270
GGAGTGAAATGAAGAGCAGA	Peak1085	chr4_124940080_124940270
GAGGAAGTGCTCTATGTTGA	Peak1087	chr4_124981788_124981888
GCTTATGCAAGATTTCCTAG	Peak1088	chr4_124982664_124982829
GGGATCAGAAAGGAAACAAG	Peak1088	chr4_124982664_124982829
GAAGCTTGAGTAATCCTTTC	Peak1089	chr4_129480214_129480379
GCACACGGACAGTTCTCAAG	Peak1089	chr4_129480214_129480379
GAATTCATGAATCTGTACAG	Peak109	chr1_214698932_214699079
GGTGTTCAGCTGGGAAGCTT	Peak109	chr1_214698932_214699079
GAATCAGTTGTTTCTCTCAG	Peak1090	chr4_129797465_129797760
GCAGATGGCTAATGCTTCAA	Peak1090	chr4_129797465_129797760
GCAGCTGTGCAATCTGTGAT	Peak1090	chr4_129797465_129797760
GGCAGCTGTGCAATCTGTGA	Peak1090	chr4_129797465_129797760
GGCCCTTCCTTTGGCTCCTG	Peak1090	chr4_129797465_129797760
GTCCCCAGGAGCCAAAGGAA	Peak1090	chr4_129797465_129797760
GTGATGGGAAATGTCACACC	Peak1090	chr4_129797465_129797760
GAAAGCTTGCTCAATGTTAG	Peak1091	chr4_131733462_131733872
GAAATGTAAGTGATGACAGA	Peak1091	chr4_131733462_131733872
GAAGGGCTGCTGGTTGTAGC	Peak1091	chr4_131733462_131733872
GAGAACACCTGCAGACAAAA	Peak1091	chr4_131733462_131733872
GAGACAGCTCAAATCAAAAC	Peak1091	chr4_131733462_131733872
GAGCTGTCTCCATTAGCCAC	Peak1091	chr4_131733462_131733872
GGCAAGTATTCTATTCACAT	Peak1091	chr4_131733462_131733872
GTCTCAAGGGAGTTAGAAAG	Peak1091	chr4_131733462_131733872
GCTGTGCTTTAGGTTGCAGT	Peak1092	chr4_137038348_137038540
GAAGAAGGAAGGAACAGGGA	Peak1093	chr4_138453844_138454009
GAATGCAGTAGATTGAAAGG	Peak1093	chr4_138453844_138454009
GCAGTAGATTGAAAGGCGGA	Peak1093	chr4_138453844_138454009
GGAGGAAGAAGGAAGGAACA	Peak1093	chr4_138453844_138454009
GGAGTGGGGAGGAAGAAGGA	Peak1093	chr4_138453844_138454009
GGGAGGAAGAAGGAAGGAAC	Peak1093	chr4_138453844_138454009
GAACGAAACCCATTCTGGAT	Peak1094	chr4_139483931_139484154
GAGCCCAGTCAGAAGCAAAC	Peak1094	chr4_139483931_139484154
GCCTAGGTCAATGTTTATTT	Peak1094	chr4_139483931_139484154
GCTTCCTGTTTGCTTCTGAC	Peak1094	chr4_139483931_139484154
GTTTGCTTCTGACTGGGCTC	Peak1094	chr4_139483931_139484154
GACAACACTAATCCTTGCAA	Peak1095	chr4_139516433_139516599
GGAGAACAGGTGCCATTGCA	Peak1095	chr4_139516433_139516599
GGGAACCACATGCACCCCAG	Peak1095	chr4_139516433_139516599
GTACATGGGCCTCTTCTGCA	Peak1095	chr4_139516433_139516599
GACCCCACCCACCCTTGCCT	Peak1096	chr4_143394937_143395235
GCATAGCTTCCTGTTGTCCC	Peak1096	chr4_143394937_143395235
GCTGGGCTGGAAGTTCTAGC	Peak1096	chr4_143394937_143395235
GGACAATGCTTGCTAGTTTC	Peak1096	chr4_143394937_143395235
GGCTGAGTACACACAGAAGC	Peak1096	chr4_143394937_143395235
GGGAAGTGAGTCTGCTGGGC	Peak1096	chr4_143394937_143395235
GGGTCACCTGCCTTGTCATC	Peak1096	chr4_143394937_143395235
GGGTCTCCTGCCCTGCAGCC	Peak1096	chr4_143394937_143395235
GGTCACCTGCCTTGTCATCT	Peak1096	chr4_143394937_143395235
GTGCAGCTTCCTGTTATCCC	Peak1096	chr4_143394937_143395235
GAACGGCGCGCGCTGCCCGG	Peak1097	chr4_150999287_150999804
GAAGGAAGGAAGGGTGGGGC	Peak1097	chr4_150999287_150999804
GACAGCCTGTCGGCGGCGGA	Peak1097	chr4_150999287_150999804
GAGCAGCTCCTGCGGGTCCC	Peak1097	chr4_150999287_150999804
GAGCGCGGATGCTTGCCAGT	Peak1097	chr4_150999287_150999804
GAGCGCTCCCGGGAGCGCCG	Peak1097	chr4_150999287_150999804
GAGGAGGCTTCCCGGCCCCG	Peak1097	chr4_150999287_150999804
GAGGCGGCGGCGCTGCACCC	Peak1097	chr4_150999287_150999804
GAGTCGCGCGGGCCCAGGCC	Peak1097	chr4_150999287_150999804
GATGCCAAACCGCGGAGAAG	Peak1097	chr4_150999287_150999804
GCAGCCCGCCTCCCACGCAG	Peak1097	chr4_150999287_150999804
GCAGGAGCCGTCAGGCGGGC	Peak1097	chr4_150999287_150999804
GCCAAACCGCGGAGAAGGGG	Peak1097	chr4_150999287_150999804
GCCCATTAACGCGCGGCGCC	Peak1097	chr4_150999287_150999804
GCCCCGGGGATGCCAAACCG	Peak1097	chr4_150999287_150999804
GCCCGGCGCCGCGCGTTAAT	Peak1097	chr4_150999287_150999804
GCCGCCGCCTCGGCCGCGCC	Peak1097	chr4_150999287_150999804
GCCGCGCTCCAGGGAAGGAA	Peak1097	chr4_150999287_150999804
GCCGGGCAGCGCGCGCCGTT	Peak1097	chr4_150999287_150999804
GCCGGGCAGGAGCCGTCAGG	Peak1097	chr4_150999287_150999804
GCCGGGCCTGACCGCTGCGT	Peak1097	chr4_150999287_150999804
GCGCCCGGATCCCGCCCGCC	Peak1097	chr4_150999287_150999804
GCGCGCCGTTCGGGGCTGAG	Peak1097	chr4_150999287_150999804
GCGCGCGCTGCCCGGCGGGC	Peak1097	chr4_150999287_150999804
GCGCTCCCGGGAGCGCCGAG	Peak1097	chr4_150999287_150999804
GCGGATGCTTGCCAGTGGGC	Peak1097	chr4_150999287_150999804
GCGGCGCTGCACCCCGGGCC	Peak1097	chr4_150999287_150999804
GCGGGAGGAGCAGCTCCTGC	Peak1097	chr4_150999287_150999804
GCGGGATCCGGGCGCGGCCG	Peak1097	chr4_150999287_150999804
GCTCCTCCCGCGCCGGCGCT	Peak1097	chr4_150999287_150999804
GCTGCCCGGCGGGCGGGATC	Peak1097	chr4_150999287_150999804
GGAAGGAAGGAAGGGTGGGG	Peak1097	chr4_150999287_150999804
GGAGCAGCTCCTGCGGGTCC	Peak1097	chr4_150999287_150999804
GGAGGAAGGAAGGAAGGGTG	Peak1097	chr4_150999287_150999804
GGAGGAGGCTTCCCGGCCCC	Peak1097	chr4_150999287_150999804
GGATCCGGGCGCGGCCGAGG	Peak1097	chr4_150999287_150999804
GGATGCCAAACCGCGGAGAA	Peak1097	chr4_150999287_150999804
GGCAGACGCCCGAGCTTTGT	Peak1097	chr4_150999287_150999804
GGCAGGAGCCGTCAGGCGGG	Peak1097	chr4_150999287_150999804
GGCCGCGCTCCAGGGAAGGA	Peak1097	chr4_150999287_150999804
GGCCGGGCCTGACCGCTGCG	Peak1097	chr4_150999287_150999804
GGCCTCCCTCCGCCGCCGAC	Peak1097	chr4_150999287_150999804
GGCGCCGGGCAGGAGCCGTC	Peak1097	chr4_150999287_150999804
GGCGCGCGCTGCCCGGCGGG	Peak1097	chr4_150999287_150999804
GGCGGAGGGAGGCCAGAGCG	Peak1097	chr4_150999287_150999804
GGCGTCTGCCGAGCGCTCCC	Peak1097	chr4_150999287_150999804
GGCTGCATTATTTCCCGCTA	Peak1097	chr4_150999287_150999804
GGGAAGGAAGGGGCCAGACA	Peak1097	chr4_150999287_150999804
GGGAGGAAGGAAGGAAGGGT	Peak1097	chr4_150999287_150999804
GGGATGCCAAACCGCGGAGA	Peak1097	chr4_150999287_150999804
GGGCAGCCCCGCCCGCCTGA	Peak1097	chr4_150999287_150999804
GGGCCGAGCGCCGGCGCGGG	Peak1097	chr4_150999287_150999804
GGGCCTGACCGCTGCGTGGG	Peak1097	chr4_150999287_150999804
GGGCGTCTGCCGAGCGCTCC	Peak1097	chr4_150999287_150999804
GGGCTGCATTATTTCCCGCT	Peak1097	chr4_150999287_150999804
GGGGAGGAAGGAAGGAAGGG	Peak1097	chr4_150999287_150999804
GGGGCTGAGAGGGCCGTGTC	Peak1097	chr4_150999287_150999804
GGGGTGCAGCGCCGCCGCCT	Peak1097	chr4_150999287_150999804
GGTTTGGCATCCCCGGGGCC	Peak1097	chr4_150999287_150999804
GTCAGGCGGGCGGGGCTGCC	Peak1097	chr4_150999287_150999804
GTCGCGCGGGCCCAGGCCCG	Peak1097	chr4_150999287_150999804
GTGGGGCGGGGCGCGGAGCG	Peak1097	chr4_150999287_150999804
GGACAATGACCTGGGCAGCT	Peak1098	chr4_150999943_151000043
GTCGCACTGGACAATGACCT	Peak1098	chr4_150999943_151000043
GTGGGGCCGAGGAGCCGCGG	Peak1098	chr4_150999943_151000043
GAACGGGCTCATCCCCAGTC	Peak1099	chr4_151000229_151000329
GCAGCAGCTCGGGCCCCAAG	Peak1099	chr4_151000229_151000329
GCCCGAGCTGCTGCTGCCCC	Peak1099	chr4_151000229_151000329
GCGGCCGGGGTCGCGGAGAG	Peak1099	chr4_151000229_151000329
GCTCGGGCCCCAAGGGGAAC	Peak1099	chr4_151000229_151000329
GGATGAGCCCGTTCCCCTTG	Peak1099	chr4_151000229_151000329
GGGATGAGCCCGTTCCCCTT	Peak1099	chr4_151000229_151000329
GGGGATGAGCCCGTTCCCCT	Peak1099	chr4_151000229_151000329
GGGGCCCCTCTCCGCGACCC	Peak1099	chr4_151000229_151000329
GACCAGGCCCATCCCTGGGG	Peak11	chr1_3693134_3693393
GAGGGACCAGGCCCATCCCT	Peak11	chr1_3693134_3693393
GCCAGGCGTGACATCCAGGA	Peak11	chr1_3693134_3693393
GCCCACAAGGAGTACTTGGA	Peak11	chr1_3693134_3693393
GCCTTCCTGGATGTCACGCC	Peak11	chr1_3693134_3693393
GCGGCTGCCAGGGAGGACCC	Peak11	chr1_3693134_3693393
GGAATGCACCCCTACCAATT	Peak11	chr1_3693134_3693393
GGAGGGACCAGGCCCATCCC	Peak11	chr1_3693134_3693393
GGCCAAGAGCCTGTGTACAG	Peak11	chr1_3693134_3693393
GGCCCACAAGGAGTACTTGG	Peak11	chr1_3693134_3693393
GGCCCATCCCTGGGGAGGGA	Peak11	chr1_3693134_3693393
GGCGGCTGCCAGGGAGGACC	Peak11	chr1_3693134_3693393
GGGAAGGGCTTGTTTCCCCG	Peak11	chr1_3693134_3693393
GGGGCCGGCGGCTGCCAGGG	Peak11	chr1_3693134_3693393
GGGTAGACCCGGGTCCTCCC	Peak11	chr1_3693134_3693393
GGGTCCTCCCTGGCAGCCGC	Peak11	chr1_3693134_3693393
GGGTCTACCCTCCCTCCCCA	Peak11	chr1_3693134_3693393
GGTGCATTCCTAGAGCCACA	Peak11	chr1_3693134_3693393
GTCCCTCCAAGTACTCCTTG	Peak11	chr1_3693134_3693393
GTGACATCCAGGAAGGCTGT	Peak11	chr1_3693134_3693393
GTGCATTCCTAGAGCCACAT	Peak11	chr1_3693134_3693393
GTGGGAAGGGCTTGTTTCCC	Peak11	chr1_3693134_3693393
GAAAATCTATTAATGCTGGC	Peak110	chr1_215716454_215716688
GAAAGGTCTACTGATTCTGA	Peak110	chr1_215716454_215716688
GAATCAGTAGACCTTTCTCT	Peak110	chr1_215716454_215716688
GACCTTTCTCTGGGTTATGG	Peak110	chr1_215716454_215716688
GGATTTCCTGCTCCCTTGCA	Peak110	chr1_215716454_215716688
GGGATTTCCTGCTCCCTTGC	Peak110	chr1_215716454_215716688
GGGTTTCCTGAACTTCCCAC	Peak110	chr1_215716454_215716688
GTAGACCTTTCTCTGGGTTA	Peak110	chr1_215716454_215716688
GCGCCGCACGGCAGGTGCGG	Peak1100	chr4_151000614_151000714
GCGGCTTGGAAAGCACCCCG	Peak1100	chr4_151000614_151000714
GCTCCGCCGCACCTGCCGTG	Peak1100	chr4_151000614_151000714
GGAGCGCCGGCAGGTGCAGT	Peak1100	chr4_151000614_151000714
GGCGCAGCGGGGAGCCCGCG	Peak1100	chr4_151000614_151000714
GGGCGTGAGCCGGCGCAGCG	Peak1100	chr4_151000614_151000714
GGGGTGCTTTCCAAGCCGCA	Peak1100	chr4_151000614_151000714
GGGTGCTTTCCAAGCCGCAC	Peak1100	chr4_151000614_151000714
GTGGGCGTGAGCCGGCGCAG	Peak1100	chr4_151000614_151000714
GACTGCAACTTCTGCTTCCC	Peak1101	chr4_151045105_151045351
GGAGTGCAGTGGTGTGATCT	Peak1101	chr4_151045105_151045351
GTTAAGGATATTCCAGGCCG	Peak1102	chr4_151047603_151047736
GAACCCAAAATTGAAGCAAA	Peak1103	chr4_151048021_151048244
GACCCCAGTAAACCACAGCT	Peak1104	chr4_151151796_151152046
GCTCTGTAACTTAGACAGAT	Peak1104	chr4_151151796_151152046
GCTGTACAGCCAGCCCCTCA	Peak1104	chr4_151151796_151152046
GCTGTACAGCTGCTTCCCAA	Peak1104	chr4_151151796_151152046
GCTTCCCAAGGGAGGAAACG	Peak1104	chr4_151151796_151152046
GGCTGTACAGCTGCTTCCCA	Peak1104	chr4_151151796_151152046
GGTTGCAAAGACAAAAGACT	Peak1104	chr4_151151796_151152046
GTAACTTAGACAGATGGGCT	Peak1104	chr4_151151796_151152046
GTACAGCTGCTTCCCAAGGG	Peak1104	chr4_151151796_151152046
GAATCGGAAACCTTTGAGGT	Peak1105	chr4_152639178_152639430
GATGATGATGTCAGTGCCCT	Peak1105	chr4_152639178_152639430
GATTCAGTAGGTCGAGGGTG	Peak1105	chr4_152639178_152639430
GCACTGACATCATCATCTCC	Peak1105	chr4_152639178_152639430
GCAGTTAAAGTTCTTAAACT	Peak1105	chr4_152639178_152639430
GGTAAGAAATATAAATCTTC	Peak1105	chr4_152639178_152639430
GTTTCCGATTCAGTAGGTCG	Peak1105	chr4_152639178_152639430
GAAGGAACTCATGCCTCTGA	Peak1106	chr4_153649621_153649814
GAATTTGTGGCAGGTCCCTC	Peak1106	chr4_153649621_153649814
GACCCAACAGAGCAGCCCAG	Peak1106	chr4_153649621_153649814
GACCGGAAGGAGCAGCCCAG	Peak1106	chr4_153649621_153649814
GACCTGAAGGAGCAGCCCAG	Peak1106	chr4_153649621_153649814
GAGCAGCCCAGAGGGACCTG	Peak1106	chr4_153649621_153649814
GAGGGAACTTATGCCTCTGA	Peak1106	chr4_153649621_153649814
GCCCAGAGGGACCTGAGGAG	Peak1106	chr4_153649621_153649814
GGCATAAGTTCCCTCTCCTC	Peak1106	chr4_153649621_153649814
GTCCCTCTGGGCTGCTCTGT	Peak1106	chr4_153649621_153649814
GTTCCTTCTCAGGTCCCTCT	Peak1106	chr4_153649621_153649814
GAAACCTTGCAGAGTGCCCT	Peak1107	chr4_154649985_154650085
GCAGAGTGCCCTGGGACTGC	Peak1107	chr4_154649985_154650085
GCAGGCAGAAGACATCCCAG	Peak1107	chr4_154649985_154650085
GGAAACCTTGCAGAGTGCCC	Peak1107	chr4_154649985_154650085
GTCTTCTGCCTGCAGTCCCA	Peak1107	chr4_154649985_154650085
GAACTCTGCCAACAACCCAA	Peak1108	chr4_156529784_156529989
GATCTTCTTCCAAGCTCCCT	Peak1108	chr4_156529784_156529989
GCCAACAACCCAAGGGAGCT	Peak1108	chr4_156529784_156529989
GCTTCAGTCCAGATGTTGGC	Peak1108	chr4_156529784_156529989
GGCCTGAGGGTTTCAGTTTC	Peak1108	chr4_156529784_156529989
GGGTTTCAGTTTCGGGCTGG	Peak1108	chr4_156529784_156529989
GTCTCTCTAGAGGTTTACAG	Peak1108	chr4_156529784_156529989
GTTCATTTCCTTGTAACTAC	Peak1108	chr4_156529784_156529989
GACACTGCCATGGGGTTGGT	Peak1109	chr4_157118353_157118507
GACAGGCAGGTTGTGGTTGC	Peak1109	chr4_157118353_157118507
GCGGGCTCCAACCAACCCCA	Peak1109	chr4_157118353_157118507
GTTTACAGTTCCTGAAGCCC	Peak1109	chr4_157118353_157118507
GAAGCAGAGCTCTTGAGATG	Peak111	chr1_220944070_220944313
GAATACACTTCAGAGCAACA	Peak111	chr1_220944070_220944313
GACATTCTAGTCTCCCACTC	Peak111	chr1_220944070_220944313
GAAAGATGGCAAGGGAAATT	Peak1110	chr4_159973031_159973222
GCAAGGAAGAGCAAGGAAGG	Peak1110	chr4_159973031_159973222
GCTTGATAGTAGGTAGCTGG	Peak1110	chr4_159973031_159973222
GGGAGATGCCTGTGAAGGAG	Peak1110	chr4_159973031_159973222
GGGCAGGGCAAGGAAGAGCA	Peak1110	chr4_159973031_159973222
GTAGGTAGCTGGAGGGTGTG	Peak1110	chr4_159973031_159973222
GAAGAGAAGATGGAGCCTCA	Peak1111	chr4_159973562_159973782
GATGCTGCTATCTGTCCCCA	Peak1111	chr4_159973562_159973782
GGAAGAGAAGATGGAGCCTC	Peak1111	chr4_159973562_159973782
GTTGGAACTTGATTCCCCTG	Peak1111	chr4_159973562_159973782
GACCTCAAAGTAAAACAGTA	Peak1112	chr4_164509037_164509256
GATATATCTGCTCTCTCCCC	Peak1112	chr4_164509037_164509256
GCAGCCATTTCATTTCCCCT	Peak1112	chr4_164509037_164509256
GAGAGGAACTGGCAGTGGGC	Peak1113	chr4_169873959_169874219
GCCCTAGTAACTGAAGACAA	Peak1113	chr4_169873959_169874219
GCCCTTTGTCTTCAGTTACT	Peak1113	chr4_169873959_169874219
GCGGGTAGAGAAGGACTAGC	Peak1113	chr4_169873959_169874219
GGAAAGAGCCACCTCCTGGC	Peak1113	chr4_169873959_169874219
GGGCATCAGCTGTGGTAGTA	Peak1113	chr4_169873959_169874219
GGGGTGAAATGGATTCTGTG	Peak1113	chr4_169873959_169874219
GGTAGAGAAGGACTAGCAGG	Peak1113	chr4_169873959_169874219
GTAGAGAAGGACTAGCAGGT	Peak1113	chr4_169873959_169874219
GTATGGAGAGGAACTGGCAG	Peak1113	chr4_169873959_169874219
GTGAGGATTCTTGGCTTTGG	Peak1113	chr4_169873959_169874219
GTGGTAGTATGGAGAGGAAC	Peak1113	chr4_169873959_169874219
GTTACTAGGGCGGGTAGAGA	Peak1113	chr4_169873959_169874219
GCGCTTCAAGGGAGGGGCAA	Peak1114	chr4_172565582_172565757
GGGTATCATAGCCTGAAGGC	Peak1114	chr4_172565582_172565757
GCACAGAGACTGCACCCAAA	Peak1115	chr4_172565806_172566034
GTGGCGTGCACATGCATAGT	Peak1115	chr4_172565806_172566034
GTTTACTTGTAAAGCCCTTT	Peak1115	chr4_172565806_172566034
GCCTAATGCATGACTGTTTC	Peak1116	chr4_172801328_172801513
GGCTGAACAAGAGGAGGTTC	Peak1116	chr4_172801328_172801513
GAACTCAGGGTGAGTTGACA	Peak1117	chr4_182580493_182580669
GATCCAAGAACACTCTCTTG	Peak1117	chr4_182580493_182580669
GGATCCAAGAACACTCTCTT	Peak1117	chr4_182580493_182580669
GTTTGAATCATGACCCTTTC	Peak1117	chr4_182580493_182580669
GAGGCCACCACCAGGGAGGG	Peak1118	chr4_184263993_184264202
GAGGGAGGGAGCCCAGGGCC	Peak1118	chr4_184263993_184264202
GCAACCCTCACCCAGGCCCT	Peak1118	chr4_184263993_184264202
GCCGCGCGCAACCCTCACCC	Peak1118	chr4_184263993_184264202
GCCTGGGTGAGGGTTGCGCG	Peak1118	chr4_184263993_184264202
GCGAGGCCACCACCAGGGAG	Peak1118	chr4_184263993_184264202
GCGCTGCCGGCCCTGCAGGA	Peak1118	chr4_184263993_184264202
GCGTAGCCACGAGAGCAGGG	Peak1118	chr4_184263993_184264202
GCTACGCCCCGCTTCTCCCA	Peak1118	chr4_184263993_184264202
GCTCCCTCCCTCCCTCCTGC	Peak1118	chr4_184263993_184264202
GGAGCCCAGGGCCTGGGTGA	Peak1118	chr4_184263993_184264202
GGAGGGAGGGAGGGAGCCCA	Peak1118	chr4_184263993_184264202
GGCCCTGCAGGAGGGAGGGA	Peak1118	chr4_184263993_184264202
GGGAAGAGGGTGGTGGCCGT	Peak1118	chr4_184263993_184264202
GGGAGCCCAGGGCCTGGGTG	Peak1118	chr4_184263993_184264202
GGGGAAGAGGGTGGTGGCCG	Peak1118	chr4_184263993_184264202
GGGGCGTAGCCACGAGAGCA	Peak1118	chr4_184263993_184264202
GGTGGTGGCCGTGGGAGAAG	Peak1118	chr4_184263993_184264202
GGTTGCGCGCGGCCCCTCCC	Peak1118	chr4_184263993_184264202
GTGCGAGGCCACCACCAGGG	Peak1118	chr4_184263993_184264202
GTGGTGGCCGTGGGAGAAGC	Peak1118	chr4_184263993_184264202
GTTGCGCGCGGCCCCTCCCA	Peak1118	chr4_184263993_184264202
GACTTCTGCTTTGCGGGACA	Peak1119	chr4_184264251_184264351
GCAGGGGACTTCTGCTTTGC	Peak1119	chr4_184264251_184264351
GCCGTCAGGACACGTGGGCT	Peak1119	chr4_184264251_184264351
GGCCGTCAGGACACGTGGGC	Peak1119	chr4_184264251_184264351
GGTCCTGACTCTACCTAGCA	Peak1119	chr4_184264251_184264351
GTCCCCTGCTAGGTAGAGTC	Peak1119	chr4_184264251_184264351
GTCCTGACTCTACCTAGCAG	Peak1119	chr4_184264251_184264351
GACTAACACCCTGTGGAAAG	Peak112	chr1_225393159_225393374
GAAGTTAACGGACTGCAGGA	Peak1120	chr4_185435643_185435743
GCTGGTCTGGTGACAGGAGT	Peak1120	chr4_185435643_185435743
GGAAGTTAACGGACTGCAGG	Peak1120	chr4_185435643_185435743
GGAGTAGCTGGTCTGGTGAC	Peak1120	chr4_185435643_185435743
GTCAGAGCGAGAGGAGTAGC	Peak1120	chr4_185435643_185435743
GTGGGAAGTTAACGGACTGC	Peak1120	chr4_185435643_185435743
GAACAGAACAAATAGACGTG	Peak1122	chr4_186306075_186306406
GACGTGTGGGCCCACACAAA	Peak1122	chr4_186306075_186306406
GCCAACAAGGTTTCCCCATT	Peak1122	chr4_186306075_186306406
GGAAAAGTGTGGGGAAAGAC	Peak1122	chr4_186306075_186306406
GTAAATCTGCCACACCCAAA	Peak1122	chr4_186306075_186306406
GTGTGGGCCCACACAAACGG	Peak1122	chr4_186306075_186306406
GAGGTGGCTGGCAGATGTTG	Peak1123	chr4_189090177_189090364
GGTGGCTGGCAGATGTTGAG	Peak1123	chr4_189090177_189090364
GAAATGAAGGTGGGACCCTC	Peak1124	chr5_1460347_1460695
GACCGAGAAGGAGGAGCGTC	Peak1124	chr5_1460347_1460695
GAGCCAGGAGAAATGAAGGT	Peak1124	chr5_1460347_1460695
GAGCGTCTGGCTCCAGGTGC	Peak1124	chr5_1460347_1460695
GATCAGCATACGGCAGCAGC	Peak1124	chr5_1460347_1460695
GATCCTAACCAGAAGCTGGC	Peak1124	chr5_1460347_1460695
GCACAGCAGGGTAACTCGTG	Peak1124	chr5_1460347_1460695
GCAGGGTGGCCGTGCCCGGC	Peak1124	chr5_1460347_1460695
GGAGCCAGGAGAAATGAAGG	Peak1124	chr5_1460347_1460695
GGCAGGGTGGCCGTGCCCGG	Peak1124	chr5_1460347_1460695
GGGCAGCTGCTGCTAAGATG	Peak1124	chr5_1460347_1460695
GGTCCCACCTTCATTTCTCC	Peak1124	chr5_1460347_1460695
GGTGCCGGCTGTGGGCAGGG	Peak1124	chr5_1460347_1460695
GTCAACTCTTGCGTGAACAC	Peak1124	chr5_1460347_1460695
GTGCCCGGCGGGTGCACCCA	Peak1124	chr5_1460347_1460695
GTGGGCAGGGTGGCCGTGCC	Peak1124	chr5_1460347_1460695
GAGTTTAAGAGGCACAATGA	Peak1125	chr5_2537773_2537994
GCGTCTGTGGGCATGCAGCT	Peak1125	chr5_2537773_2537994
GGCAGAACAAACCCGAAACT	Peak1125	chr5_2537773_2537994
GGCATGTGTGTGAGTTTAAG	Peak1125	chr5_2537773_2537994
GAAACAGCAGGAAGGCCAGA	Peak1126	chr5_2538543_2538789
GAAAGAGAGAAAGAGGAAAC	Peak1126	chr5_2538543_2538789
GAAGACAATTAGAATAAGAT	Peak1126	chr5_2538543_2538789
GACACTCTTGTGGCAAGAAG	Peak1126	chr5_2538543_2538789
GAGAAAGAGGAAACAGGAAG	Peak1126	chr5_2538543_2538789
GAGGGGAGGGCGAACGGAAA	Peak1126	chr5_2538543_2538789
GCAAGAAGCGGACAGGGTGG	Peak1126	chr5_2538543_2538789
GGCAAGAAGCGGACAGGGTG	Peak1126	chr5_2538543_2538789
GTGGCAAGAAGCGGACAGGG	Peak1126	chr5_2538543_2538789
GAAAATGTTACTAGAGACTT	Peak1127	chr5_2664839_2665023
GGGAGTTCCTCAGATAAAAG	Peak1127	chr5_2664839_2665023
GGGATGTGATGCTGAGTGAT	Peak1127	chr5_2664839_2665023
GTTAACCCCGGTTTAGCACA	Peak1127	chr5_2664839_2665023
GTCAAAAGCATAGCAGAGAA	Peak1128	chr5_8059489_8059623
GATGGAAACCAGTACAGCTG	Peak1129	chr5_8417685_8417979
GCCTAATCTCCAGGGGAAAG	Peak1129	chr5_8417685_8417979
GCCTCTTTCCCCTGGAGATT	Peak1129	chr5_8417685_8417979
GCTGTGACATGAGATACTGA	Peak1129	chr5_8417685_8417979
GCTTGTTACCATATAATAAA	Peak1129	chr5_8417685_8417979
GGAGATAGAAGGGGTGGGTC	Peak1129	chr5_8417685_8417979
GTGGTTGTTGATGTTTCCTA	Peak1129	chr5_8417685_8417979
GTTGTTTCATCTACAGATTA	Peak1129	chr5_8417685_8417979
GTTTCCTACGGGAGATAGAA	Peak1129	chr5_8417685_8417979
GAATGTAGACTTTGGGTGGG	Peak113	chr1_225623893_225624063
GCTAAAACTGCGAGTCCCAG	Peak113	chr1_225623893_225624063
GGGGAAGAAGGCTGCCCTCT	Peak113	chr1_225623893_225624063
GTAGACTTTGGGTGGGAGGT	Peak113	chr1_225623893_225624063
GTCTACATTCAGAGGCAGAC	Peak113	chr1_225623893_225624063
GTAGACTAGCTGCCCTCCGA	Peak1130	chr5_14342455_14342555
GGGCTTTCCCATGGGAGGTG	Peak1131	chr5_14342565_14342665
GAATTCTGAAGCACAATGTC	Peak1132	chr5_16886318_16886575
GAGCACATAGTTGATAAAGT	Peak1132	chr5_16886318_16886575
GATTAGCTCTCTGATGGGCA	Peak1132	chr5_16886318_16886575
GCACGGGACAGTTGTTCTTG	Peak1132	chr5_16886318_16886575
GACCCAGAAATTCCACTGCT	Peak1133	chr5_16890399_16890499
GCAGGCCAAGAAACCATGGG	Peak1135	chr5_32505406_32505573
GCCAAGAAACCATGGGAGGG	Peak1135	chr5_32505406_32505573
GGCACCAGCAGCCTCACTCT	Peak1135	chr5_32505406_32505573
GGGTGGACCACAGCAGAGGG	Peak1135	chr5_32505406_32505573
GGTGGACCACAGCAGAGGGC	Peak1135	chr5_32505406_32505573
GTGGACCACAGCAGAGGGCG	Peak1135	chr5_32505406_32505573
GTTCAGGGCAGATGCTCTGG	Peak1135	chr5_32505406_32505573
GTTCGTGGAGCTGAATGTTC	Peak1135	chr5_32505406_32505573
GACATCATGGATCTCTCCAA	Peak1136	chr5_33299989_33300243
GCTTCAACTGTAATTGCAGC	Peak1136	chr5_33299989_33300243
GGGCTTCATCATCTGCGTCT	Peak1137	chr5_33686622_33686722
GGTAATGGTATTTGAAGGTG	Peak1137	chr5_33686622_33686722
GACTGTTCTCAGGGCCTTCA	Peak1138	chr5_34752404_34752656
GCAAATACTGAGCACCATGG	Peak1138	chr5_34752404_34752656
GCAGCAAATACTGAGCACCA	Peak1138	chr5_34752404_34752656
GCCTTCAGGGAGCTAAACAC	Peak1138	chr5_34752404_34752656
GGTTGAGATGAGCGAGTGGA	Peak1138	chr5_34752404_34752656
GGCTCGATTCAAGGCAGCTG	Peak1139	chr5_35130278_35130447
GTGGTTGGATTTGTTTGATG	Peak1139	chr5_35130278_35130447
GAGAGGCAAAGGGAAGACAT	Peak1140	chr5_35172062_35172368
GAGCCTGCCTTGAGTCTCAC	Peak1140	chr5_35172062_35172368
GCAAAGGGAAGACATTGGGC	Peak1140	chr5_35172062_35172368
GCATCTTAAATGCTGAAAGC	Peak1140	chr5_35172062_35172368
GGCATGACAGGGCCGTGAGC	Peak1140	chr5_35172062_35172368
GGTTAACAGTGCAAGCTACA	Peak1140	chr5_35172062_35172368
GGTTGTTTAACATGAGGGGC	Peak1140	chr5_35172062_35172368
GTCTGTACTACAGTGACTGC	Peak1140	chr5_35172062_35172368
GTTGTTTAACATGAGGGGCT	Peak1140	chr5_35172062_35172368
GCTTCACTGTGATGGTAGAA	Peak1141	chr5_35173388_35173578
GGAAGTCAAAGCAGGTCTTC	Peak1141	chr5_35173388_35173578
GGTGCAGAGGAAGTCAAAGC	Peak1141	chr5_35173388_35173578
GATGTGTAGGTTTGTTACAT	Peak1142	chr5_40515122_40515329
GGTACATGTGCAGGATGTGT	Peak1142	chr5_40515122_40515329
GGTGATTTGCTGCACCTATC	Peak1142	chr5_40515122_40515329
GTGATTTGCTGCACCTATCA	Peak1142	chr5_40515122_40515329
GAACCTCCCTGGGAGACCCC	Peak1143	chr5_42667245_42667471
GACAACAAAAGCCACTCTTG	Peak1143	chr5_42667245_42667471
GAGGTTGGCCCAGATGCCCC	Peak1143	chr5_42667245_42667471
GATCTTCCTGGGGTCTCCCA	Peak1143	chr5_42667245_42667471
GCAGAATACATTGAATCCCC	Peak1143	chr5_42667245_42667471
GCTCTCAGAGGATGACAGTG	Peak1143	chr5_42667245_42667471
GGTTGGCCCAGATGCCCCTG	Peak1143	chr5_42667245_42667471
GTATAGCAGAAACATGCTCA	Peak1143	chr5_42667245_42667471
GTCAACATCCTCTTATATGG	Peak1143	chr5_42667245_42667471
GTGTCTGTGTTAGCTCTCAG	Peak1143	chr5_42667245_42667471
GAAACATCTGTACACAAACA	Peak1144	chr5_42667788_42668036
GAAACCTTTGTCTCTCCCTC	Peak1144	chr5_42667788_42668036
GAGAGACAAAGGTTTCAGGG	Peak1144	chr5_42667788_42668036
GAGGGAGAGACAAAGGTTTC	Peak1144	chr5_42667788_42668036
GATGTTTCTCTTGTGGTATG	Peak1144	chr5_42667788_42668036
GATTCTGATCCAGTAGGTAT	Peak1144	chr5_42667788_42668036
GGAGCCTGAGGGAGAGACAA	Peak1144	chr5_42667788_42668036
GTGTACAGATGTTTCTCTTG	Peak1144	chr5_42667788_42668036
GTTTCCATTTCCGGCAAACT	Peak1144	chr5_42667788_42668036
GGTTCTCAAGACTGGGGTAA	Peak1145	chr5_42668538_42668773
GTCATTGCAAAATGTCTCCT	Peak1145	chr5_42668538_42668773
GTTCTCAAGACTGGGGTAAA	Peak1145	chr5_42668538_42668773
GAAATCTTTGAAGCCAAAGA	Peak1146	chr5_56032040_56032236
GACAGGAAGCAACGCTCAAG	Peak1146	chr5_56032040_56032236
GCTACTGGGGAGGAAGAAAA	Peak1146	chr5_56032040_56032236
GAATCATAGAGCTTTGCTGG	Peak1147	chr5_56032969_56033214
GAGATTGAAAGGCCAAAATG	Peak1147	chr5_56032969_56033214
GAGCTTTGCTGGTGGGTGAG	Peak1147	chr5_56032969_56033214
GAGGGGCGGGGAAGAATGGT	Peak1147	chr5_56032969_56033214
GCTCAGCGGGATAGCTACTT	Peak1147	chr5_56032969_56033214
GCTTGCATGATACCATACAT	Peak1147	chr5_56032969_56033214
GGAACTTTAGAAGTACTGGA	Peak1147	chr5_56032969_56033214
GGAAGAATGGTTGGCAAAAT	Peak1147	chr5_56032969_56033214
GGATGCTTCTGGTAGCATAC	Peak1147	chr5_56032969_56033214
GGGTGAGGGGCGGGGAAGAA	Peak1147	chr5_56032969_56033214
GAGGCTGCCTCAGGTTCTAA	Peak1148	chr5_56737490_56737695
GCCTCAGGTTCTAAGGGTAG	Peak1148	chr5_56737490_56737695
GCTCCATCACCCACCCCATT	Peak1148	chr5_56737490_56737695
GGAGGCTGCCTCAGGTTCTA	Peak1148	chr5_56737490_56737695
GTTTCTTATCAGCTCCCAGG	Peak1148	chr5_56737490_56737695
GAGCTGCTCCTCCCAAGCCC	Peak1149	chr5_56738355_56738455
GAGTTCATGAGCAAACAGAA	Peak1149	chr5_56738355_56738455
GCTCCACAAAGTGTCATTTG	Peak1149	chr5_56738355_56738455
GAGGGCACATCTGCCAGGGC	Peak115	chr1_226885413_226885615
GATGTGAGGGCACATCTGCC	Peak115	chr1_226885413_226885615
GCAGATGTGCCCTCACATCT	Peak115	chr1_226885413_226885615
GCCCTCACATCTGGGTGATA	Peak115	chr1_226885413_226885615
GCTCTTATGTGGAGAGTTCT	Peak115	chr1_226885413_226885615
GGCAGATGTGCCCTCACATC	Peak115	chr1_226885413_226885615
GGTGATAAGGGGTCCCCAAG	Peak115	chr1_226885413_226885615
GTGAAATAGACAATTCTCTA	Peak115	chr1_226885413_226885615
GAAGCCACATGTGGGTGTTC	Peak1150	chr5_56738490_56738760
GACAACAACCCAACAGAACA	Peak1150	chr5_56738490_56738760
GAGAAAGCCAGGCAGTCATG	Peak1150	chr5_56738490_56738760
GGCTTCTCCACATGACTGCC	Peak1150	chr5_56738490_56738760
GGTAAGTGACATCCACGGCT	Peak1150	chr5_56738490_56738760
GGTAGTCCTCATTCAGTTTC	Peak1150	chr5_56738490_56738760
GTGCTTCTGCCTTGTTCTGT	Peak1150	chr5_56738490_56738760
GAACACATCTGTCTCCCTGG	Peak1151	chr5_56741420_56741575
GAGGAACACATCTGTCTCCC	Peak1151	chr5_56741420_56741575
GCCTTTCACACAACCCCATT	Peak1151	chr5_56741420_56741575
GCTAAAATAGTCACACACTC	Peak1151	chr5_56741420_56741575
GCTCACAGGAACTCCAAATG	Peak1151	chr5_56741420_56741575
GGAACACATCTGTCTCCCTG	Peak1151	chr5_56741420_56741575
GGGAGACAGATGTGTTCCTC	Peak1151	chr5_56741420_56741575
GAATCAAACAGCATTGCCAC	Peak1152	chr5_58858680_58858985
GGAAGTGAGACAGAGCCTCT	Peak1152	chr5_58858680_58858985
GGCTCTGTCTCACTTCCTTC	Peak1152	chr5_58858680_58858985
GGGCCCCTCTGGGCATTGCC	Peak1152	chr5_58858680_58858985
GGTGACCTGGCAATGCCCAG	Peak1152	chr5_58858680_58858985
GTGACCTGGCAATGCCCAGA	Peak1152	chr5_58858680_58858985
GAAAGAATGAAAGATGGCCT	Peak1153	chr5_59480492_59480716
GAGAAATGTGTTTGCATTTG	Peak1153	chr5_59480492_59480716
GATTCTATTGTGGTGGCCCA	Peak1153	chr5_59480492_59480716
GCAAACACATTTCTCTAGTA	Peak1153	chr5_59480492_59480716
GCCATCTTTCATTCTTTCTA	Peak1153	chr5_59480492_59480716
GGCCACCACAATAGAATCAC	Peak1153	chr5_59480492_59480716
GAACCTGCACAGCTCTGTGC	Peak1154	chr5_60496500_60496754
GACTGAGCTCCCAGTGGGAG	Peak1154	chr5_60496500_60496754
GCAGACTGGAGCTGCAGTGG	Peak1154	chr5_60496500_60496754
GCAGGAAGCCACAGTGATAA	Peak1154	chr5_60496500_60496754
GCTCAGTCATCTTAGGCAGC	Peak1154	chr5_60496500_60496754
GTGGCTGCTGCCCCTCCCAC	Peak1154	chr5_60496500_60496754
GGTAGGCCTCATATCCCTAG	Peak1155	chr5_64338734_64338941
GATGGCAGTGACAACGCTCC	Peak1156	chr5_66299777_66299877
GGAGTCACTGTGGACTTCCC	Peak1156	chr5_66299777_66299877
GGATGGCAGTGACAACGCTC	Peak1156	chr5_66299777_66299877
GGTTGTATAGGAAAAGCACG	Peak1156	chr5_66299777_66299877
GTATAGGAAAAGCACGCGGA	Peak1156	chr5_66299777_66299877
GAAATAAATAAATAAACCCG	Peak1157	chr5_66299902_66300028
GACGGATCCATTCCGGGCTC	Peak1157	chr5_66299902_66300028
GAGCGGCGGCCCAGGCTGCG	Peak1157	chr5_66299902_66300028
GCACACACCCGGAGCAGCCG	Peak1157	chr5_66299902_66300028
GCCGGGACAGCCCCGCAGCC	Peak1157	chr5_66299902_66300028
GGAGCGGCGGCCCAGGCTGC	Peak1157	chr5_66299902_66300028
GGCTGTCCCGGCACCGGCTG	Peak1157	chr5_66299902_66300028
GGGAGCGGCGGCCCAGGCTG	Peak1157	chr5_66299902_66300028
GGGCTGTCCCGGCACCGGCT	Peak1157	chr5_66299902_66300028
GGGGCTGTCCCGGCACCGGC	Peak1157	chr5_66299902_66300028
GGGTTTATTTATTTATTTCC	Peak1157	chr5_66299902_66300028
GCGCGGCCACCAAGCTGTCC	Peak1158	chr5_66300032_66300176
GCGCGGCCGGGGCTGGTGGG	Peak1158	chr5_66300032_66300176
GGCCTTGTCCCTGGACAGCT	Peak1158	chr5_66300032_66300176
GGCGCGGCCGGGGCTGGTGG	Peak1158	chr5_66300032_66300176
GGGCTCACGGGAAAGGGAGC	Peak1158	chr5_66300032_66300176
GAGGTACTTTGTCATCTGTT	Peak1159	chr5_66300228_66300520
GCCGCTTCTGCGAGGGGCGG	Peak1159	chr5_66300228_66300520
GTAGATACCAAAAGGAAACT	Peak1159	chr5_66300228_66300520
GACACCAAACCAGGCCACCA	Peak116	chr1_228928839_228928991
GCACTCTAAGATGTCAGTTG	Peak116	chr1_228928839_228928991
GCCACCAGGGAGGGCTGTGC	Peak116	chr1_228928839_228928991
GCCCCATAAGAAGACCCTGG	Peak116	chr1_228928839_228928991
GCCTCCAGGGTCTTCTTATG	Peak116	chr1_228928839_228928991
GGCACTCTAAGATGTCAGTT	Peak116	chr1_228928839_228928991
GGGCACTCTAAGATGTCAGT	Peak116	chr1_228928839_228928991
GAAGGGGATTTGTGGAATTA	Peak1160	chr5_66633955_66634230
GATGGCTGCCTCTTTCCTCT	Peak1160	chr5_66633955_66634230
GCCACAGAGCCCTCTGATCT	Peak1160	chr5_66633955_66634230
GCTGAGGAGGACGTAGAGGT	Peak1160	chr5_66633955_66634230
GGAGGTCACAAGGGAAATAG	Peak1160	chr5_66633955_66634230
GTATACAGCCATGCTGAGTG	Peak1160	chr5_66633955_66634230
GTGCTGGTAGGAGGTCACAA	Peak1160	chr5_66633955_66634230
GAACTTCTCTCTATTGAGAT	Peak1161	chr5_66824876_66825089
GACTCATCTCCTCTCAACCG	Peak1161	chr5_66824876_66825089
GATAACACATGATGCTGAAG	Peak1161	chr5_66824876_66825089
GCTCTCTCTGTAGTTCGCCA	Peak1161	chr5_66824876_66825089
GTCCAGGCTCTGTCCAGAGC	Peak1161	chr5_66824876_66825089
GTCCTTAAATCAGAGAGAGT	Peak1161	chr5_66824876_66825089
GAACATAGAGTCATTACTTT	Peak1162	chr5_67272918_67273174
GAGTCATTACTTTAGGAAGT	Peak1162	chr5_67272918_67273174
GGCCAATCCTGGAGATTCTA	Peak1162	chr5_67272918_67273174
GCAGCAGATTCTACCCATGG	Peak1164	chr5_76034784_76034884
GAAATGACTCATAAGCAGTA	Peak1165	chr5_76034899_76035077
GCTAGTCTTATGGAAACACA	Peak1165	chr5_76034899_76035077
GGAAACACACGGAAAACCAG	Peak1165	chr5_76034899_76035077
GGCTGTGTGTTTATCACTTC	Peak1165	chr5_76034899_76035077
GTGATAAACACACAGCCTGC	Peak1165	chr5_76034899_76035077
GCAAGAGAAATTAGAGTTCT	Peak1166	chr5_77517854_77518053
GCTTGCTTCTGCCTCAGAGT	Peak1166	chr5_77517854_77518053
GGGGATCCAGTAGCTGCTGC	Peak1166	chr5_77517854_77518053
GTCATGGCCAGTCAGTCTCA	Peak1166	chr5_77517854_77518053
GCCACTGTTGTCATTGTCCC	Peak1167	chr5_81094337_81094544
GCCTGGGACAATGACAACAG	Peak1167	chr5_81094337_81094544
GCTCCTGTAGTTACCCAGCA	Peak1167	chr5_81094337_81094544
GAAATCTCCAATTTGAGGGA	Peak1168	chr5_81830042_81830292
GGGATATCTTGTCTTCTATG	Peak1168	chr5_81830042_81830292
GGTAAACCTCAATGCAAACA	Peak1168	chr5_81830042_81830292
GAAGCAGGCATGTATGAAGT	Peak1169	chr5_82214600_82214757
GAATTAGTCCTCATGGGAAT	Peak1169	chr5_82214600_82214757
GAGAGGTCCCACTTCCTGTT	Peak1169	chr5_82214600_82214757
GGAAATAACCCATTCCCATG	Peak1169	chr5_82214600_82214757
GGAAGCAGGCATGTATGAAG	Peak1169	chr5_82214600_82214757
GGGTTATTTCCCTTGAGCAT	Peak1169	chr5_82214600_82214757
GGGTTGTTATAAAGAAAGAG	Peak1169	chr5_82214600_82214757
GAGCACCCCACAGAGCATCT	Peak117	chr1_229125815_229126058
GCAGGGCCCCAGATGCTCTG	Peak117	chr1_229125815_229126058
GGAGCACCCCACAGAGCATC	Peak117	chr1_229125815_229126058
GGGCCCTGCAAGGCCATCGC	Peak117	chr1_229125815_229126058
GGGCCTGCGATGGCCTTGCA	Peak117	chr1_229125815_229126058
GAACAGCAGTGACTCTGGAA	Peak1170	chr5_88554752_88555013
GCATGAAAATGCCAAAGTAG	Peak1170	chr5_88554752_88555013
GCGCACCATGTGATTTCCCC	Peak1170	chr5_88554752_88555013
GGCCAACATTTCCCCAGGGA	Peak1170	chr5_88554752_88555013
GAAGAAGGGGCTAAACTATT	Peak1171	chr5_93879972_93880072
GCTATGGCATAATGAGAAGA	Peak1171	chr5_93879972_93880072
GCAAACCTGAAAGAAATTTG	Peak1172	chr5_93880252_93880352
GTCTTTACTGACATTTCAAT	Peak1172	chr5_93880252_93880352
GACAAAGAACATAATCTCTT	Peak1173	chr5_94513912_94514374
GAGCCTACCAGGCTCTGAGC	Peak1173	chr5_94513912_94514374
GCACCACTGCACTCTAGCCT	Peak1173	chr5_94513912_94514374
GCAGAGAAAGACCACTAGGT	Peak1173	chr5_94513912_94514374
GCAGCTGTATAAGCAGGATC	Peak1173	chr5_94513912_94514374
GCAGGATCAGGCAGTGGGTG	Peak1173	chr5_94513912_94514374
GCAGGCAGAGAAAGACCACT	Peak1173	chr5_94513912_94514374
GGCAGAGAAAGACCACTAGG	Peak1173	chr5_94513912_94514374
GTACCAGCTCAGAGCCTGGT	Peak1173	chr5_94513912_94514374
GTATAAGCAGGATCAGGCAG	Peak1173	chr5_94513912_94514374
GTCACCCAGCAGAGCCTACC	Peak1173	chr5_94513912_94514374
GTGGTGCACTCTTGTGTTCC	Peak1173	chr5_94513912_94514374
GTGTTGGTTGGCCTTCAGCC	Peak1173	chr5_94513912_94514374
GTTCTTTGTCTTCAGCTGCC	Peak1173	chr5_94513912_94514374
GAAGGAGTAGGCACAGACTG	Peak1174	chr5_95199159_95199373
GAGGAGATTTCCCCTCTGCC	Peak1174	chr5_95199159_95199373
GAGGCTCTTGCTCAATGCTC	Peak1174	chr5_95199159_95199373
GGAACATAAACCCCAAGCCC	Peak1174	chr5_95199159_95199373
GGCTCTTGCTCAATGCTCTG	Peak1174	chr5_95199159_95199373
GTCGGGCCTAATATGAACCA	Peak1174	chr5_95199159_95199373
GTGTGTGCGTGTGTTTCTTT	Peak1175	chr5_95426322_95426506
GCAAGTAAACAAAGCCTTCT	Peak1176	chr5_95582891_95583173
GCAGAAGTCTGGCAGTCTCC	Peak1176	chr5_95582891_95583173
GCATGTCATGATGTGTATTC	Peak1176	chr5_95582891_95583173
GGAGTGAGGGTTCCAACTTT	Peak1176	chr5_95582891_95583173
GGGAGTGAGGGTTCCAACTT	Peak1176	chr5_95582891_95583173
GGTGCATGGCTGTGTTTCAC	Peak1176	chr5_95582891_95583173
GTGTATTCTGGCTGCCTAGA	Peak1176	chr5_95582891_95583173
GTGTTTCACAGGACTCTAAG	Peak1176	chr5_95582891_95583173
GACTGGCCCTTCAGGCTCTG	Peak1177	chr5_96528659_96528918
GCCCTTCAGGCTCTGCGGTG	Peak1177	chr5_96528659_96528918
GCCTCACCGCAGAGCCTGAA	Peak1177	chr5_96528659_96528918
GCGGTGAGGCCTGTCACTAC	Peak1177	chr5_96528659_96528918
GCTAACGGAGTTATGTTCCC	Peak1177	chr5_96528659_96528918
GCTTGCTGCAGCTGCTGTGG	Peak1177	chr5_96528659_96528918
GGCCTCACCGCAGAGCCTGA	Peak1177	chr5_96528659_96528918
GGCTTGCTGCAGCTGCTGTG	Peak1177	chr5_96528659_96528918
GGGAGTAAGACTGGCCCTTC	Peak1177	chr5_96528659_96528918
GGGCACGGTGGGAGTAAGAC	Peak1177	chr5_96528659_96528918
GGGGAAAAGCCAGTAGTGAC	Peak1177	chr5_96528659_96528918
GTAAATAAACTCAGTGCTGT	Peak1177	chr5_96528659_96528918
GTGCTGTTGGTGGGGCACGG	Peak1177	chr5_96528659_96528918
GTGGCTTGCTGCAGCTGCTG	Peak1177	chr5_96528659_96528918
GCAGTTTGTCTCTGAAGCCA	Peak1178	chr5_100163243_100163458
GCTGAAGTGCTCATCTTGAC	Peak1178	chr5_100163243_100163458
GGGAGTGCCTGATTAAATAC	Peak1178	chr5_100163243_100163458
GGTGGGTCCTGTATTTAATC	Peak1178	chr5_100163243_100163458
GTATTTAATCAGGCACTCCC	Peak1178	chr5_100163243_100163458
GATGATTTCAAGATGGGCTG	Peak1179	chr5_102729210_102729442
GATGTCAAGGGCAAGCAGCT	Peak1179	chr5_102729210_102729442
GGCAATCGGTTTGAGAAACA	Peak1179	chr5_102729210_102729442
GGGCAAGCAGCTGGGCTTGA	Peak1179	chr5_102729210_102729442
GCAGGCCTGACAAGAGCTGG	Peak118	chr1_229126440_229126540
GCTCTTGTCAGGCCTGCACA	Peak118	chr1_229126440_229126540
GCTGACAGAAGCCAGAAAGG	Peak118	chr1_229126440_229126540
GGAAGTTAGGAGGCCCTTGA	Peak118	chr1_229126440_229126540
GTGCAGGCCTGACAAGAGCT	Peak118	chr1_229126440_229126540
GAAAGCAGACAGTAAGAGGG	Peak1180	chr5_103029380_103029606
GAGAGAAAGCAGACAGTAAG	Peak1180	chr5_103029380_103029606
GAGTTCTGGAAAAGAACAGC	Peak1180	chr5_103029380_103029606
GCAGCAAAACATTCATTGGG	Peak1180	chr5_103029380_103029606
GGGAGGAAACAAATAGATAT	Peak1180	chr5_103029380_103029606
GCCTCTTATGGGTATTAGGA	Peak1181	chr5_106940771_106940964
GCTAACTAGAGGCAGCTGTT	Peak1181	chr5_106940771_106940964
GCTGCAAGATTTAAAAGCTC	Peak1181	chr5_106940771_106940964
GGCACCTAATTTGTCCCACA	Peak1181	chr5_106940771_106940964
GGGCCAGTGGTTCCACTGGG	Peak1181	chr5_106940771_106940964
GGGGAAGCAGAGCTAACTAG	Peak1181	chr5_106940771_106940964
GAAATGAGTCAGTCTCTCTG	Peak1182	chr5_109012751_109012922
GAGTCTTGTTTGAACTCTGA	Peak1182	chr5_109012751_109012922
GGGAGAAGGGACAGAAGGCA	Peak1182	chr5_109012751_109012922
GTCTTGTTTGAACTCTGAAG	Peak1182	chr5_109012751_109012922
GTGAAACCATCTGGAGAGCA	Peak1182	chr5_109012751_109012922
GTTTAGCTCTGGCAGCTTGG	Peak1182	chr5_109012751_109012922
GCTTTCAGCTAAGGAGCTAG	Peak1183	chr5_112022515_112022713
GGGCTGAAAAGCTTGAAGAA	Peak1183	chr5_112022515_112022713
GGGGACCAAGTGGTTCTCTG	Peak1183	chr5_112022515_112022713
GTGGGGACCAAGTGGTTCTC	Peak1183	chr5_112022515_112022713
GTGGTTCTCTGGGGACCTTA	Peak1183	chr5_112022515_112022713
GACAAACCGCCCTTGCTGTC	Peak1184	chr5_115374572_115374820
GACTCCCTGAAAGGCTGTCT	Peak1184	chr5_115374572_115374820
GAGTCCCTGGGGCCCAGGGG	Peak1184	chr5_115374572_115374820
GCAGTCAGCTCTGCAGTTAC	Peak1184	chr5_115374572_115374820
GCCCTTGCTGTCTGGTAGCA	Peak1184	chr5_115374572_115374820
GCTGTCTGGTAGCAGGGTGG	Peak1184	chr5_115374572_115374820
GGACTCCCTGAAAGGCTGTC	Peak1184	chr5_115374572_115374820
GGAGGAAATGAAGCAGAATG	Peak1184	chr5_115374572_115374820
GGCCCCAGGGACTCCCTGAA	Peak1184	chr5_115374572_115374820
GTCTTGATCCACAAGAGGAC	Peak1184	chr5_115374572_115374820
GTTACAGGTTTGGCCTCTCA	Peak1184	chr5_115374572_115374820
GAGAATATGACTAGTACACT	Peak1185	chr5_117842173_117842504
GAGGGCCATGCCTTCTCTTG	Peak1185	chr5_117842173_117842504
GCTATCAGGAAGTGGCAAGG	Peak1185	chr5_117842173_117842504
GCTGCCACTGCTAATGGGGA	Peak1185	chr5_117842173_117842504
GGCTGCACTTATGATGTGCA	Peak1185	chr5_117842173_117842504
GTGACTGGGGTGTTGCTATT	Peak1185	chr5_117842173_117842504
GTGCAGGGCCCTGCCCGCAC	Peak1185	chr5_117842173_117842504
GTTGTGCTGCCACTGCTAAT	Peak1185	chr5_117842173_117842504
GTTGTTCCTCTTTCAGTGAC	Peak1185	chr5_117842173_117842504
GATTGCTCTTCCTCTCCATC	Peak1186	chr5_118011472_118011676
GCCCCACTCTCCAGGGAAAA	Peak1186	chr5_118011472_118011676
GGCTTGCCTTAGTCCATCTG	Peak1186	chr5_118011472_118011676
GGGCTTGCCTTAGTCCATCT	Peak1186	chr5_118011472_118011676
GTAACCAAGCCCCACTCTCC	Peak1186	chr5_118011472_118011676
GCCCCTCTGTGTAGTCCCCA	Peak1187	chr5_122734185_122734344
GCCCTTACCCCAGGTCCCAT	Peak1187	chr5_122734185_122734344
GGGACTACACAGAGGGGCCC	Peak1187	chr5_122734185_122734344
GGTGGTTGCTCTACACATAG	Peak1187	chr5_122734185_122734344
GTCCCATGGGGACTACACAG	Peak1187	chr5_122734185_122734344
GTGGTTGCTCTACACATAGT	Peak1187	chr5_122734185_122734344
GTGTAGTCCCCATGGGACCT	Peak1187	chr5_122734185_122734344
GAGCTGTCTCTCTCCATGTG	Peak1188	chr5_123789477_123789718
GCTAAATGAAGTTAAAGAGT	Peak1188	chr5_123789477_123789718
GGCACCAGCCTTGTGAGATT	Peak1188	chr5_123789477_123789718
GGCTAAATGAAGTTAAAGAG	Peak1188	chr5_123789477_123789718
GGTTCCTAATCTCACAAGGC	Peak1188	chr5_123789477_123789718
GCATACAGACGGGCAGGCTG	Peak1189	chr5_124248399_124248712
GCCCCACTGCTCAAACCTCT	Peak1189	chr5_124248399_124248712
GCTGTGGGGCTCCAACCCCA	Peak1189	chr5_124248399_124248712
GTTTGAGCAGTGGGGCACTG	Peak1189	chr5_124248399_124248712
GAATGCCATCTGAGCCCTTG	Peak119	chr1_229506517_229506704
GAGCCCTTGAGGGAGCCCCA	Peak119	chr1_229506517_229506704
GATGGCATTCCCTGGGCAGC	Peak119	chr1_229506517_229506704
GCAAGTGCATCACCCAGAAC	Peak119	chr1_229506517_229506704
GCACACGATGATGCTGGGCT	Peak119	chr1_229506517_229506704
GCAGGCCAGGGCAGATTAGA	Peak119	chr1_229506517_229506704
GCCCTTGAGGGAGCCCCATG	Peak119	chr1_229506517_229506704
GGCTCCCTCAAGGGCTCAGA	Peak119	chr1_229506517_229506704
GGGCTCAGATGGCATTCCCT	Peak119	chr1_229506517_229506704
GCCTGTGTGTCTGCCTGCTA	Peak1190	chr5_124248956_124249056
GTCTGCCTGCTAGGGTCTTG	Peak1190	chr5_124248956_124249056
GTGTCTGCCTGCTAGGGTCT	Peak1190	chr5_124248956_124249056
GAAGTGAATTGTGGTTGTAG	Peak1191	chr5_127716194_127716294
GACCCTTGATGAGTCCCTGA	Peak1191	chr5_127716194_127716294
GATGAGTCCCTGAGGGGCTC	Peak1191	chr5_127716194_127716294
GCCCCTCAGGGACTCATCAA	Peak1191	chr5_127716194_127716294
GTTCATGTAGAAGTTGGCAG	Peak1192	chr5_127716401_127716661
GGAAGGACAAAGAGGAAGTA	Peak1193	chr5_127789434_127789634
GTGAGGTACAGGAGGGTGGA	Peak1193	chr5_127789434_127789634
GTTGGTTTGAAACTTCCACA	Peak1193	chr5_127789434_127789634
GTTTGGTGACAAACTGTTTC	Peak1193	chr5_127789434_127789634
GAACTGTGCAACCCACGAAT	Peak1194	chr5_127791400_127791695
GACCTCCCTTAGCTGCGGGG	Peak1194	chr5_127791400_127791695
GAGCTGGTCGCCACAACCCC	Peak1194	chr5_127791400_127791695
GAGTGGGATCCTCCGATTCG	Peak1194	chr5_127791400_127791695
GATGGTAGTCCCCTGTGGCT	Peak1194	chr5_127791400_127791695
GATTATTACAGCCTCTGAGC	Peak1194	chr5_127791400_127791695
GGGGACTACCATCTCAACCC	Peak1194	chr5_127791400_127791695
GTAATAATCTGTACGTTCCA	Peak1194	chr5_127791400_127791695
GTTGAGATGGTAGTCCCCTG	Peak1194	chr5_127791400_127791695
GAATGCCTGGCAGCTGTCTG	Peak1195	chr5_131541544_131541708
GAGCAGCTGTGCTCTGCCCC	Peak1195	chr5_131541544_131541708
GCAGCTGTCTGTGGGGTCTC	Peak1195	chr5_131541544_131541708
GCAGCTGTGCTCTGCCCCAG	Peak1195	chr5_131541544_131541708
GCTGCTCAGAGCCTCTTTGT	Peak1195	chr5_131541544_131541708
GTGAGGGACAGATGCTATTC	Peak1195	chr5_131541544_131541708
GACAGAACCATTCACTCCCC	Peak1196	chr5_131733871_131734155
GCCAGTGGATCTTAGCTTGC	Peak1196	chr5_131733871_131734155
GCTGAAGCCAGGGAGCCAGG	Peak1196	chr5_131733871_131734155
GGACTCTTGAGCTTGGTGGT	Peak1196	chr5_131733871_131734155
GGGACTCTTGAGCTTGGTGG	Peak1196	chr5_131733871_131734155
GGGGCTGAAGCCAGGGAGCC	Peak1196	chr5_131733871_131734155
GTAGACACCAAGCTAGCTGC	Peak1196	chr5_131733871_131734155
GTGCTGGCAGCAAGAATTTC	Peak1196	chr5_131733871_131734155
GAGCAGTATACTGACGTATG	Peak1197	chr5_133078206_133078306
GAACAAGGAGCATAGCAGGC	Peak1198	chr5_133078467_133078663
GAAGGAACAAGGAGCATAGC	Peak1198	chr5_133078467_133078663
GCCACAAACAGTCACACCCG	Peak1198	chr5_133078467_133078663
GCCTGAATGACAGGAGCGCG	Peak1198	chr5_133078467_133078663
GCGGTGGAGATCAAAGTCCC	Peak1198	chr5_133078467_133078663
GCTATGCTCCTTGTTCCTTC	Peak1198	chr5_133078467_133078663
GGACACCACAGAGCCCACAT	Peak1198	chr5_133078467_133078663
GGGACACCACAGAGCCCACA	Peak1198	chr5_133078467_133078663
GGGCTCTGTGGTGTCCCTGA	Peak1198	chr5_133078467_133078663
GTGGTGTCCCTGAAGGAACA	Peak1198	chr5_133078467_133078663
GACTGCTCAGGAGGAAGTGG	Peak1199	chr5_135383668_135383860
GCGTGTTTGTCTCTCTGTGT	Peak1199	chr5_135383668_135383860
GCTCAGGAGGAAGTGGAGGC	Peak1199	chr5_135383668_135383860
GGAGAACTTCCTAACCACAA	Peak1199	chr5_135383668_135383860
GGAGGCAGGCTGCCCTGTCA	Peak1199	chr5_135383668_135383860
GGATACAAGTGGGAGTGAGG	Peak1199	chr5_135383668_135383860
GTGTTGGAGATCTCTAGGGA	Peak1199	chr5_135383668_135383860
GACACGCAGCTGCCAGGATG	Peak12	chr1_6035722_6035945
GATTATGTTCATGCACTCCG	Peak12	chr1_6035722_6035945
GCATGAACATAATCCCGAGA	Peak12	chr1_6035722_6035945
GCTTCCGTTGCGGCGGAAGT	Peak12	chr1_6035722_6035945
GTGTTAGGGAGACTAGGAGC	Peak12	chr1_6035722_6035945
GTTCACAATTCAGATGTGTT	Peak12	chr1_6035722_6035945
GACCTGGTGTACACCCGTCT	Peak120	chr1_230245659_230245833
GCTAACATTTGACCTCTTCT	Peak120	chr1_230245659_230245833
GCTCCCAGTGCTACCCCAGA	Peak120	chr1_230245659_230245833
GGAGGCACACCTGCTCTGCC	Peak120	chr1_230245659_230245833
GAAATTACAGTCCCCATCAC	Peak1200	chr5_141094539_141094747
GACCACTGAAAAGAGACCTC	Peak1200	chr5_141094539_141094747
GCTTCCTTGTCTCCACACTC	Peak1200	chr5_141094539_141094747
GGTAGATCAAGAAGCAGATT	Peak1200	chr5_141094539_141094747
GTTTCCTGAGTGTGGAGACA	Peak1200	chr5_141094539_141094747
GCTGTATATAAATATTGTCT	Peak1201	chr5_142510618_142510826
GACTGATTTAACCAGCTGGC	Peak1202	chr5_142511530_142511808
GCTGAGTTCAACTGGGGCAA	Peak1202	chr5_142511530_142511808
GCTGCTCTCCATGGGTTGGC	Peak1202	chr5_142511530_142511808
GCTGGCATCATTGGAGCCCG	Peak1202	chr5_142511530_142511808
GGCAAGGGAATAAGAAGAGA	Peak1202	chr5_142511530_142511808
GTGAGACTGATTTAACCAGC	Peak1202	chr5_142511530_142511808
GAAGAGGTTAGAAATGGAAG	Peak1203	chr5_142513100_142513388
GATTCATTGGTTCTGGACAA	Peak1203	chr5_142513100_142513388
GTGGCAGAAGAGGTTAGAAA	Peak1203	chr5_142513100_142513388
GTGGGTGGTTATCAAACTCT	Peak1203	chr5_142513100_142513388
GAACACAAAGCTCACAGCTT	Peak1204	chr5_142563033_142563246
GAATGCAGCTGCTGCTTTCT	Peak1204	chr5_142563033_142563246
GCAGCAGCTGCATTCACCAG	Peak1204	chr5_142563033_142563246
GGATAAGGCCAACTCCCGGT	Peak1204	chr5_142563033_142563246
GGTGCTAACCCACCGGGAGT	Peak1204	chr5_142563033_142563246
GTTGCCTGCAAGCTGCTCCC	Peak1204	chr5_142563033_142563246
GAGCACATTGGCCAAGGCCT	Peak1205	chr5_144091627_144091727
GCAGGATTGAGGAGGTAGCG	Peak1205	chr5_144091627_144091727
GCCTGGGAGCAGGATTGAGG	Peak1205	chr5_144091627_144091727
GAAGAAAAGCTGCTCAAAAG	Peak1206	chr5_144091732_144091964
GGAGGAGGAAGAGGAAGTTG	Peak1206	chr5_144091732_144091964
GGCGGAGGAGGAGGAGGAAG	Peak1206	chr5_144091732_144091964
GTGGTCTTGCTGTGTTCCCA	Peak1206	chr5_144091732_144091964
GACAGCTCCCTATTACACAA	Peak1207	chr5_146055271_146055552
GAGAGAGAAGTGACTGAGGT	Peak1207	chr5_146055271_146055552
GAGAGAGAGAGAAGTGACTG	Peak1207	chr5_146055271_146055552
GATAAGCTTCCGATTAGTCC	Peak1207	chr5_146055271_146055552
GAGCATGGGCTCAGAGTAAG	Peak1208	chr5_149976532_149976786
GCCAACTTAGCAGAAGCCAC	Peak1208	chr5_149976532_149976786
GCTTCTGCTAAGTTGGCTAG	Peak1208	chr5_149976532_149976786
GGATTGTCTTGATTTCCCAA	Peak1208	chr5_149976532_149976786
GGCTGTGATAGTGAGGGTTG	Peak1208	chr5_149976532_149976786
GGGCTGTGATAGTGAGGGTT	Peak1208	chr5_149976532_149976786
GTGTCTCAATAAACCTCCCT	Peak1208	chr5_149976532_149976786
GTTTATTGAGACACAGCACT	Peak1208	chr5_149976532_149976786
GAGATGGGCTCCAAGGGCCT	Peak1209	chr5_153126119_153126219
GAGGCAGAGACCCAGGCCCT	Peak1209	chr5_153126119_153126219
GCCCACTGAGGCAGAGACCC	Peak1209	chr5_153126119_153126219
GCCTGGGTCTCTGCCTCAGT	Peak1209	chr5_153126119_153126219
GGCCCACACCTGGCCCACTG	Peak1209	chr5_153126119_153126219
GGCCTGGGTCTCTGCCTCAG	Peak1209	chr5_153126119_153126219
GGTCTCTGCCTCAGTGGGCC	Peak1209	chr5_153126119_153126219
GAACATTATGCTGTTGTCTC	Peak121	chr1_230259053_230259234
GAAGAGGGGCACATGCAGGT	Peak121	chr1_230259053_230259234
GAATACCAAGGGTCTCCCCA	Peak121	chr1_230259053_230259234
GGAATACCAAGGGTCTCCCC	Peak121	chr1_230259053_230259234
GTCATCATTCAAAATATTTC	Peak121	chr1_230259053_230259234
GAGCTCAGATTCTCCTTGGG	Peak1211	chr5_154782738_154782976
GAGGCAGCCATAATCCTCTT	Peak1211	chr5_154782738_154782976
GCCTGCTGCAGCTGCTGTGG	Peak1211	chr5_154782738_154782976
GCTCAGATTCTCCTTGGGCG	Peak1211	chr5_154782738_154782976
GCTGCAGCAGGCCCCGCCCA	Peak1211	chr5_154782738_154782976
GCTGGTAGCTGCGTGGGAGC	Peak1211	chr5_154782738_154782976
GGCCTGCTGCAGCTGCTGTG	Peak1211	chr5_154782738_154782976
GGGCCTGCTGCAGCTGCTGT	Peak1211	chr5_154782738_154782976
GGGGCCTGCTGCAGCTGCTG	Peak1211	chr5_154782738_154782976
GTCTGAGCTCAGATTCTCCT	Peak1211	chr5_154782738_154782976
GAGGATTCAAGCTTGCCCTA	Peak1212	chr5_154783013_154783113
GCATCCACTGCCATTGTGTA	Peak1212	chr5_154783013_154783113
GGAGGATTCAAGCTTGCCCT	Peak1212	chr5_154783013_154783113
GAGGCAGCAGGGGAGTGAAG	Peak1213	chr5_154783145_154783245
GATACCAGCACCTACTCCGG	Peak1213	chr5_154783145_154783245
GCCTCCACCGGAGTAGGTGC	Peak1213	chr5_154783145_154783245
GGAGTAGGTGCTGGTATCTA	Peak1213	chr5_154783145_154783245
GTGGACTCTGTGAGAGTCCT	Peak1213	chr5_154783145_154783245
GAAGCCCTATCCCTAGGGGA	Peak1214	chr5_154783252_154783463
GACACTCCCCATTACCAGCC	Peak1214	chr5_154783252_154783463
GATGCTCTCTCCCTTCCCCT	Peak1214	chr5_154783252_154783463
GGGAGAGAGCATCACATCAA	Peak1214	chr5_154783252_154783463
GCAGAAGGCAAAGGGGAAGT	Peak1215	chr5_157863834_157863934
GGACTTACTACCATGGCAGA	Peak1215	chr5_157863834_157863934
GGGAAGTAGGCCCTCTTATA	Peak1215	chr5_157863834_157863934
GTCCCCTGAGACATCCTCAG	Peak1215	chr5_157863834_157863934
GACTTCCTCTTCCACTCTGA	Peak1216	chr5_158886970_158887143
GAGAAGAAACCAAAACCCGG	Peak1216	chr5_158886970_158887143
GATGACTCATTCCCTCAGAG	Peak1216	chr5_158886970_158887143
GCCCTTGACTAGAGTCCCTC	Peak1216	chr5_158886970_158887143
GGTTTCATCCTTAGACTGCA	Peak1216	chr5_158886970_158887143
GAGTAGGGAGGGTTGGGGAG	Peak1217	chr5_163723272_163723372
GGACTGAGTAGGGAGGGTTG	Peak1217	chr5_163723272_163723372
GGGACTGAGTAGGGAGGGTT	Peak1217	chr5_163723272_163723372
GTATTCCTGAGGGACTGAGT	Peak1217	chr5_163723272_163723372
GAAAGACCACGCAAAAGGGA	Peak1218	chr5_163723720_163724022
GACCTAATGTAGGAGTGAGC	Peak1218	chr5_163723720_163724022
GAGTTATCCTTTGGTTCATT	Peak1218	chr5_163723720_163724022
GCAGCATCAAGCAAGACTTC	Peak1218	chr5_163723720_163724022
GGAAGAAAGACCACGCAAAA	Peak1218	chr5_163723720_163724022
GGCAGTCAAAGAGGACAGGC	Peak1218	chr5_163723720_163724022
GGGGCGAAGAGGATGTTCTC	Peak1218	chr5_163723720_163724022
GGTTCATTCGGCAGTCAAAG	Peak1218	chr5_163723720_163724022
GTAACGTGCTGCACTGGTTC	Peak1218	chr5_163723720_163724022
GTCAAAGAGGACAGGCTGGC	Peak1218	chr5_163723720_163724022
GGGTGGTGGTTGCTGACAGT	Peak1219	chr5_164615979_164616143
GGTGGTGGTTGCTGACAGTT	Peak1219	chr5_164615979_164616143
GGTGGTTGCTGACAGTTGGG	Peak1219	chr5_164615979_164616143
GAAATCAGGGTGGAAGAGTC	Peak122	chr1_231859875_231860169
GAAGTCCTCGGGAAGAAATC	Peak122	chr1_231859875_231860169
GATGGCAGTGAAGTGGCCTG	Peak122	chr1_231859875_231860169
GCAGGGCCCCTGGGCATCCC	Peak122	chr1_231859875_231860169
GCATCCCAGGAGACAGCCCA	Peak122	chr1_231859875_231860169
GCCTGCCTGCGTGGGTCCTT	Peak122	chr1_231859875_231860169
GCTGTCTCCTGGGATGCCCA	Peak122	chr1_231859875_231860169
GCTTCCCTGGGCTGTCTCCT	Peak122	chr1_231859875_231860169
GGCATCCCAGGAGACAGCCC	Peak122	chr1_231859875_231860169
GGCTGTCTCCTGGGATGCCC	Peak122	chr1_231859875_231860169
GGGGCCCTGCCTGCCTGCGT	Peak122	chr1_231859875_231860169
GGGTGGAAGAGTCAGGATAA	Peak122	chr1_231859875_231860169
GTTTAAAGATGGCAGTGAAG	Peak122	chr1_231859875_231860169
GATCTCTAATCGTGTGCTGT	Peak1220	chr5_165504172_165504331
GGCATTGATGCCTCTGAGCG	Peak1220	chr5_165504172_165504331
GGTTACACCTTGTAACTCCC	Peak1221	chr5_165510712_165510933
GTTCTGCTAAATATCCCCTT	Peak1221	chr5_165510712_165510933
GGAAACATCTGTGAAGCTCT	Peak1223	chr5_171774708_171774856
GGCATAATGTGTGTCACCCA	Peak1223	chr5_171774708_171774856
GATGTCTTGAAAACTGCTGA	Peak1224	chr5_171839945_171840249
GCAGAAAGCCACAAGGTCCT	Peak1224	chr5_171839945_171840249
GCAGCCATTGAGGCTGGACT	Peak1224	chr5_171839945_171840249
GCAGGAAGTGGAGAAAGGCC	Peak1224	chr5_171839945_171840249
GCTCCGGCTCCGCTGGGACT	Peak1224	chr5_171839945_171840249
GCTGTCCAAAGAACACGCCA	Peak1224	chr5_171839945_171840249
GGCAGAAAGCCACAAGGTCC	Peak1224	chr5_171839945_171840249
GGCCCTGAAAGCCCTGCCCC	Peak1224	chr5_171839945_171840249
GGGCCATCATGCGCAGCTGC	Peak1224	chr5_171839945_171840249
GGTCCTGGGGCAGGGCTTTC	Peak1224	chr5_171839945_171840249
GTCCTGGGGCAGGGCTTTCA	Peak1224	chr5_171839945_171840249
GATTCTAATTCCATGGGTCC	Peak1225	chr5_173527257_173527618
GCATGTGGGGAACCACGTGG	Peak1225	chr5_173527257_173527618
GCTCGGAAATGCTGATGCCT	Peak1225	chr5_173527257_173527618
GCTGCTTCTAATGTGAAGCA	Peak1225	chr5_173527257_173527618
GGGAGGTACGTTGGAGGTAG	Peak1225	chr5_173527257_173527618
GGTAATTACCGTGTGTAACC	Peak1225	chr5_173527257_173527618
GGTCCAGGACAAGGCTGTCC	Peak1225	chr5_173527257_173527618
GGTGTAGTTGGTTTGAGATA	Peak1225	chr5_173527257_173527618
GGTTACACACGGTAATTACC	Peak1225	chr5_173527257_173527618
GAACGGCAGGCAGGAAAGTC	Peak1226	chr5_178582076_178582261
GAACGGCCACGGGGCTTGTG	Peak1226	chr5_178582076_178582261
GCTTGTGTGGTGACGGGCTG	Peak1226	chr5_178582076_178582261
GGCTTGTGTGGTGACGGGCT	Peak1226	chr5_178582076_178582261
GGGCTTGTGTGGTGACGGGC	Peak1226	chr5_178582076_178582261
GGTGACATCTGACTAAGCAG	Peak1226	chr5_178582076_178582261
GGTGTCAGACAAGCCATAGC	Peak1226	chr5_178582076_178582261
GTAACAGCCACACTGCAGCT	Peak1226	chr5_178582076_178582261
GTGACATCTGACTAAGCAGA	Peak1226	chr5_178582076_178582261
GTGGCGTGAAAGAGAACGGC	Peak1226	chr5_178582076_178582261
GTTACAGGCAGAACGGCCAC	Peak1226	chr5_178582076_178582261
GAAAGTCAGGGCTCCATGCT	Peak1227	chr5_178582779_178583024
GAGAAGGGAAGGAGGGCCAC	Peak1227	chr5_178582779_178583024
GCAGGAGTGAGGGCAGGTTG	Peak1227	chr5_178582779_178583024
GCCACGCGTTCCACAGAGAA	Peak1227	chr5_178582779_178583024
GCGTACACCGCCAGCTCACC	Peak1227	chr5_178582779_178583024
GGCAGGAGTGAGGGCAGGTT	Peak1227	chr5_178582779_178583024
GGCATGGCAGGAGTGAGGGC	Peak1227	chr5_178582779_178583024
GGCCACGCGTTCCACAGAGA	Peak1227	chr5_178582779_178583024
GGCCCTCCTTCCCTTCTCTG	Peak1227	chr5_178582779_178583024
GGCCTCAGGGTCTCTCAGTG	Peak1227	chr5_178582779_178583024
GGTTGGGGTTCTGAAAGTCA	Peak1227	chr5_178582779_178583024
GTACACCGCCAGCTCACCCG	Peak1227	chr5_178582779_178583024
GTCAGGGCTCCATGCTTGGC	Peak1227	chr5_178582779_178583024
GTCTCTCAGTGGGGCATGGC	Peak1227	chr5_178582779_178583024
GTGGCCTCAGGGTCTCTCAG	Peak1227	chr5_178582779_178583024
GTGGGGCATGGCAGGAGTGA	Peak1227	chr5_178582779_178583024
GTTCCACAGAGAAGGGAAGG	Peak1227	chr5_178582779_178583024
GAAAGCCTCACATGCACACC	Peak1228	chr6_514573_514833
GACATCACGGGGCTTGACCC	Peak1228	chr6_514573_514833
GAGAACCAGCAGGCAGGCCC	Peak1228	chr6_514573_514833
GAGAAGCCCAAGGGACGCAG	Peak1228	chr6_514573_514833
GAGCCCCTGGTGTGCATGTG	Peak1228	chr6_514573_514833
GAGGCCAAAGGGGTCGCCCC	Peak1228	chr6_514573_514833
GAGGCTTTCTTAGGAGCTGC	Peak1228	chr6_514573_514833
GCCCAAGGGACGCAGAGGCC	Peak1228	chr6_514573_514833
GCCCCTGGGGCAGATGTCTA	Peak1228	chr6_514573_514833
GGCCAAAGGGGTCGCCCCTG	Peak1228	chr6_514573_514833
GGCGACCCCTTTGGCCTCCC	Peak1228	chr6_514573_514833
GGGCTCCAGGGAGGCCAAAG	Peak1228	chr6_514573_514833
GGGGCTCCAGGGAGGCCAAA	Peak1228	chr6_514573_514833
GTCAAGCCCCGTGATGTCCC	Peak1228	chr6_514573_514833
GTGAAGACACAGCTGCTCCA	Peak1228	chr6_514573_514833
GAAAGTCTGAGAAGCAGCCT	Peak1229	chr6_2127723_2127960
GACAGGGTTCAGTCCTGGTC	Peak1229	chr6_2127723_2127960
GAGGAAGCCGGTGCCACTAC	Peak1229	chr6_2127723_2127960
GCCAGGCCTCTCGAGTGATA	Peak1229	chr6_2127723_2127960
GCCCTATCACTCGAGAGGCC	Peak1229	chr6_2127723_2127960
GCCTCTCGAGTGATAGGGCC	Peak1229	chr6_2127723_2127960
GCCTGGGCCGCACAATGAGT	Peak1229	chr6_2127723_2127960
GCTCCTGGTCCCCAGCCCAG	Peak1229	chr6_2127723_2127960
GGAAAGTCTGAGAAGCAGCC	Peak1229	chr6_2127723_2127960
GGAACATTCTGAACCAGTAG	Peak1229	chr6_2127723_2127960
GGCCTGGCAAGGAAGTGAGG	Peak1229	chr6_2127723_2127960
GGCCTGGGCCGCACAATGAG	Peak1229	chr6_2127723_2127960
GGCTCCTGGTCCCCAGCCCA	Peak1229	chr6_2127723_2127960
GGGCTCCTGGTCCCCAGCCC	Peak1229	chr6_2127723_2127960
GGGGACCAGGAGCCCTCGCT	Peak1229	chr6_2127723_2127960
GTGGGAAACGAGCCGAGCGA	Peak1229	chr6_2127723_2127960
GAAACAGACAGTGACCCTGT	Peak123	chr1_231860693_231860961
GAATCTCTCCTATAGTGACA	Peak123	chr1_231860693_231860961
GACAGTGACCCTGTAGGTCC	Peak123	chr1_231860693_231860961
GACCACAGAGAGGGTCACGG	Peak123	chr1_231860693_231860961
GAGATTCCCCGGGACCTACA	Peak123	chr1_231860693_231860961
GATCACTGGGGACGTCACTG	Peak123	chr1_231860693_231860961
GCTTTGTGTGACCACAGAGA	Peak123	chr1_231860693_231860961
GGCTTTGTGTGACCACAGAG	Peak123	chr1_231860693_231860961
GGTCACGGTGGTGTGGAAGC	Peak123	chr1_231860693_231860961
GGTGGTGTGGAAGCAGGGAG	Peak123	chr1_231860693_231860961
GTCACGGTGGTGTGGAAGCA	Peak123	chr1_231860693_231860961
GTGGTGTGGAAGCAGGGAGG	Peak123	chr1_231860693_231860961
GACACTGTTTACTCTTCTGA	Peak1230	chr6_3349194_3349339
GAGCAGGATGACAAGGAAGG	Peak1230	chr6_3349194_3349339
GAGTAAACAGTGTCTCCCTC	Peak1230	chr6_3349194_3349339
GGCTTTCTGGTTTACCCAGA	Peak1230	chr6_3349194_3349339
GGGGAGGCTTTGTGGCTTTC	Peak1230	chr6_3349194_3349339
GTCCTTGAGGGCAGAAGCAG	Peak1230	chr6_3349194_3349339
GCACACAGTGAGGGTAAAGT	Peak1231	chr6_4373243_4373462
GCAGTCCCAGTGGGATTGCT	Peak1231	chr6_4373243_4373462
GCCCTCAGGCCCCATGGGAC	Peak1231	chr6_4373243_4373462
GCCCTGTCCCATGGGGCCTG	Peak1231	chr6_4373243_4373462
GCCTCCCCTCCCGAAGCCAA	Peak1231	chr6_4373243_4373462
GCTGCCCCTTGGCTTCGGGA	Peak1231	chr6_4373243_4373462
GGGCCTGAGGGCCTGTGTTG	Peak1231	chr6_4373243_4373462
GAGTCTGTTCTCTGTGGCTG	Peak1232	chr6_6168781_6169040
GCAAAAGCCAGAAACTGAGA	Peak1232	chr6_6168781_6169040
GCAGCAGGGTGGGGTGCCTG	Peak1232	chr6_6168781_6169040
GCCAACAGTTTGAGCACAGA	Peak1232	chr6_6168781_6169040
GGCCAACAGTTTGAGCACAG	Peak1232	chr6_6168781_6169040
GACACCCTTCCTGTGCCATC	Peak1233	chr6_7342579_7342824
GCACTTGCGGTAGACCATGA	Peak1233	chr6_7342579_7342824
GCAGCATCATCTCAACAGCT	Peak1233	chr6_7342579_7342824
GTATCTGTAGTGGCTCCTGC	Peak1233	chr6_7342579_7342824
GTGCCATCTGGCCAGATGAG	Peak1233	chr6_7342579_7342824
GAACATCTGAGGGATACTCT	Peak1234	chr6_11628861_11629174
GAAGTCCTCACAGCCTCCAA	Peak1234	chr6_11628861_11629174
GAGTATCCCTCAGATGTTCT	Peak1234	chr6_11628861_11629174
GCAGTAGCAGCAGATGAGGC	Peak1234	chr6_11628861_11629174
GCCTCCAAAGGCAGAGCTGC	Peak1234	chr6_11628861_11629174
GGCTCACATCCTTGCAAAAG	Peak1234	chr6_11628861_11629174
GGGTCCAAGTCCTGGGTAAC	Peak1234	chr6_11628861_11629174
GAACACTCCCAGGGGAGCAC	Peak1235	chr6_11788406_11788566
GAGAGGGCAGAGGGCCCCTT	Peak1235	chr6_11788406_11788566
GCTCAGAGGAACACTCCCAG	Peak1235	chr6_11788406_11788566
GCTCTGTTACTTCCTCCCAA	Peak1235	chr6_11788406_11788566
GGAGAGGGCAGAGGGCCCCT	Peak1235	chr6_11788406_11788566
GGTATGTAAGGATGAGGAGA	Peak1235	chr6_11788406_11788566
GCCAGGCTGCCTCTGTGCCC	Peak1236	chr6_13470588_13470799
GCTGCTCTTGGAGAGTCCCA	Peak1236	chr6_13470588_13470799
GCTTTCCCTGGAGGCCCACG	Peak1236	chr6_13470588_13470799
GGACAGGTTTCAAGCCCTTA	Peak1236	chr6_13470588_13470799
GGCAGCCTGGCTTTCCCTGG	Peak1236	chr6_13470588_13470799
GGCTTTCCCTGGAGGCCCAC	Peak1236	chr6_13470588_13470799
GGGACAGGTTTCAAGCCCTT	Peak1236	chr6_13470588_13470799
GGGCTTGAAACCTGTCCCCT	Peak1236	chr6_13470588_13470799
GGGTAAACAAATGTCCCATG	Peak1236	chr6_13470588_13470799
GGTAAACAAATGTCCCATGT	Peak1236	chr6_13470588_13470799
GTAAACAAATGTCCCATGTG	Peak1236	chr6_13470588_13470799
GTGGGCCTCCAGGGAAAGCC	Peak1236	chr6_13470588_13470799
GTGGTCCCCGTGGGCCTCCA	Peak1236	chr6_13470588_13470799
GATGTGAAATAGACTGGGGA	Peak1237	chr6_15474175_15474323
GCTTTCTTCAAAGCTGACTT	Peak1237	chr6_15474175_15474323
GATCAAAGCTATTTCTCTCA	Peak1238	chr6_17354969_17355191
GACCCTGGGGTGGTGGGGCT	Peak1239	chr6_17740870_17741037
GACTCTAGACCCTGGGGTGG	Peak1239	chr6_17740870_17741037
GCACCTGCTCTCACAGAGGC	Peak1239	chr6_17740870_17741037
GTCATCTGGGACGTGGGTTG	Peak1239	chr6_17740870_17741037
GCCCCAGTGCTGAGAAGGTC	Peak124	chr1_235160461_235160633
GAGGAAACGGGAGGGGTAGG	Peak1240	chr6_17741731_17741831
GAGGAGGAAACGGGAGGGGT	Peak1240	chr6_17741731_17741831
GCAGTTTCCTGTTTCTGGCC	Peak1240	chr6_17741731_17741831
GCCTGAGGAGGAAACGGGAG	Peak1240	chr6_17741731_17741831
GCTCTGGCCTGAGGAGGAAA	Peak1240	chr6_17741731_17741831
GCTTTAGCTCTGGCCTGAGG	Peak1240	chr6_17741731_17741831
GGCCTGAGGAGGAAACGGGA	Peak1240	chr6_17741731_17741831
GAAAGCCAGGAGTGCCCCTG	Peak1241	chr6_21751829_21752096
GATGCAGATAATGCATCTGG	Peak1241	chr6_21751829_21752096
GCAATTATCCAAGGGAGCTG	Peak1241	chr6_21751829_21752096
GGTCTCAACCAATGACTCTG	Peak1241	chr6_21751829_21752096
GTGCAAGGCTTTCTGTAGTT	Peak1241	chr6_21751829_21752096
GAAACACATGCCACAGAAAT	Peak1243	chr6_26565702_26565944
GACCCAAGCAGCCTCCACTT	Peak1243	chr6_26565702_26565944
GAGTGAAGAACCAATTTCTG	Peak1243	chr6_26565702_26565944
GCAGCAGCGCCAGATAACGC	Peak1243	chr6_26565702_26565944
GCCGGAAGAACCCCAAGTGG	Peak1243	chr6_26565702_26565944
GCCTCCACTTGGGGTTCTTC	Peak1243	chr6_26565702_26565944
GGACCCAAGCAGCCTCCACT	Peak1243	chr6_26565702_26565944
GGAGGCTGCTTGGGTCCCTC	Peak1243	chr6_26565702_26565944
GGGGTTCTTCCGGCGTTATC	Peak1243	chr6_26565702_26565944
GGTTCTTCACTCACTCCCGA	Peak1243	chr6_26565702_26565944
GACCAGAGTGTAACCAAATA	Peak1244	chr6_32653444_32653719
GAGAAGGTTGTCTTGCCCAA	Peak1244	chr6_32653444_32653719
GCTGCTTCACTTCTTCTCAT	Peak1244	chr6_32653444_32653719
GGTCTAGTAACCACTTCCTT	Peak1244	chr6_32653444_32653719
GTCTAGTAACCACTTCCTTT	Peak1244	chr6_32653444_32653719
GTTGTCTTGCCCAAAGGAAG	Peak1244	chr6_32653444_32653719
GACTTGTGGAGGAAATCATG	Peak1245	chr6_36067085_36067347
GTGAGTTGTATTAACATTGA	Peak1245	chr6_36067085_36067347
GATGGCCAAAACCTGTTTGT	Peak1246	chr6_36067567_36067961
GCAGCTGTGGGCTCTCGGGT	Peak1246	chr6_36067567_36067961
GCATGCAGCTGTGGGCTCTC	Peak1246	chr6_36067567_36067961
GCTGTGGGCTCTCGGGTAGG	Peak1246	chr6_36067567_36067961
GGCTGGCATCCTGGATCAAG	Peak1246	chr6_36067567_36067961
GTACTGTAGCATGCAGCTGT	Peak1246	chr6_36067567_36067961
GTTTAACAATGCCCTTGACT	Peak1246	chr6_36067567_36067961
GAGGCCAGAGATTGCTGTTG	Peak1247	chr6_36294433_36294601
GCAATCTCTGGCCTCACAGC	Peak1247	chr6_36294433_36294601
GTCAGGTTCATGACACTGAG	Peak1247	chr6_36294433_36294601
GTGAGGCCAGAGATTGCTGT	Peak1247	chr6_36294433_36294601
GAATATGGTAAACCTGTTTG	Peak1248	chr6_40445609_40445845
GACATTACATCCCCTGGTGC	Peak1248	chr6_40445609_40445845
GACGCAGCAAACCGTGAATA	Peak1248	chr6_40445609_40445845
GATGTTGTTTACATGCACAC	Peak1248	chr6_40445609_40445845
GCAAAGTGGCAGCATCAGGG	Peak1248	chr6_40445609_40445845
GCATCAGGGCGGGAAGCCAC	Peak1248	chr6_40445609_40445845
GGACAGGACATTACATCCCC	Peak1248	chr6_40445609_40445845
GGGAAGCCACAGGGATAAGC	Peak1248	chr6_40445609_40445845
GAGCATTCTGTGAACAGTTC	Peak1249	chr6_41023022_41023230
GATGGCTTAAAATAGCCCAG	Peak1249	chr6_41023022_41023230
GCAGAGCGCTGAGTGTTTCC	Peak1249	chr6_41023022_41023230
GCTGGGTCTGTGCAGGGAGA	Peak1249	chr6_41023022_41023230
GCTGTAGAGAGCTGTCTCCT	Peak1249	chr6_41023022_41023230
GCTGTCTCCTGGGCCCCTCT	Peak1249	chr6_41023022_41023230
GGCCCCTCTGGGTAAACAGA	Peak1249	chr6_41023022_41023230
GGTGCAGCTGGGTCTGTGCA	Peak1249	chr6_41023022_41023230
GTCTGTGCAGGGAGAGGGTG	Peak1249	chr6_41023022_41023230
GAAGAAAGGAGAAGGGCAGG	Peak125	chr1_235160892_235161028
GAGAAGGGCAGGAGGCCTGT	Peak125	chr1_235160892_235161028
GAGCAGGTTGCAGATGGCCG	Peak125	chr1_235160892_235161028
GCCATCTGCAACCTGCTCTG	Peak125	chr1_235160892_235161028
GCGTCACTGGGGAGAGCCTC	Peak125	chr1_235160892_235161028
GGAGAAGGGCAGGAGGCCTG	Peak125	chr1_235160892_235161028
GGCAGGAGGCCTGTGGGAAG	Peak125	chr1_235160892_235161028
GGGCAGGAGGCCTGTGGGAA	Peak125	chr1_235160892_235161028
GTCACTGGGGAGAGCCTCAG	Peak125	chr1_235160892_235161028
GTCCTGTCATCTGTCCCCTG	Peak125	chr1_235160892_235161028
GTGATGCTCAGCCTGCTCCA	Peak125	chr1_235160892_235161028
GTTGCAGATGGCCGTGGAGC	Peak125	chr1_235160892_235161028
GAGAATCACTTGAACCTAGG	Peak1250	chr6_47995558_47995816
GAGAATGAAGGGGTAACTTA	Peak1252	chr6_48005802_48005927
GAGTACCAGAGCCCTGGGGA	Peak1253	chr6_48005952_48006052
GAATAGAGCTTGTGTTCTAC	Peak1254	chr6_48220947_48221110
GAGGCAGCCCAGGGTTGGCA	Peak1254	chr6_48220947_48221110
GCAACAAAACAGGAAACATC	Peak1254	chr6_48220947_48221110
GCTCTGTCATCCTCAACATA	Peak1254	chr6_48220947_48221110
GGATGACAGAGCAACAAAAC	Peak1254	chr6_48220947_48221110
GTGGGGTCCCATGCCAACCC	Peak1254	chr6_48220947_48221110
GACACAAGATAAGGCTGTGT	Peak1256	chr6_49304502_49304781
GCAGTTAATCAAACTGTGAA	Peak1256	chr6_49304502_49304781
GCCATCTGGGCACCTAGTGA	Peak1256	chr6_49304502_49304781
GGCAGTTAATCAAACTGTGA	Peak1256	chr6_49304502_49304781
GTCATACGTAAGCCTGAGTT	Peak1256	chr6_49304502_49304781
GGATAGAGTTTATTATAGAC	Peak1257	chr6_51576900_51577091
GTTTGTCTTGAAGTATAAAT	Peak1257	chr6_51576900_51577091
GACTCATATAAAATCCTCAG	Peak1258	chr6_52217290_52217472
GTAAACACAGTCCTTTACTT	Peak1258	chr6_52217290_52217472
GTCATGGGAACCCAAAGTAA	Peak1258	chr6_52217290_52217472
GTGTGTGATGAGGTGACTAA	Peak1258	chr6_52217290_52217472
GATAATCCAGATTTAGAATT	Peak126	chr1_238144643_238144828
GGTTAGAAGTTATTACCTCT	Peak126	chr1_238144643_238144828
GTTAGAAGTTATTACCTCTG	Peak126	chr1_238144643_238144828
GTTATTACCTCTGGGGACTT	Peak126	chr1_238144643_238144828
GAATAACAGTTCCCTAATGA	Peak1260	chr6_63226306_63226485
GAGGAAGCCCACTAGGTTTG	Peak1260	chr6_63226306_63226485
GCAGCGTCACAGTTGCTGGC	Peak1260	chr6_63226306_63226485
GCCAGCAACTGTGACGCTGC	Peak1260	chr6_63226306_63226485
GCTACTGTGGCAGTAGCAGA	Peak1260	chr6_63226306_63226485
GAAGCTGAGTACCTAGAAGT	Peak1261	chr6_72097946_72098342
GCACAAACACTGTGGTCTAC	Peak1261	chr6_72097946_72098342
GCAGTTGAGCACAAACACTG	Peak1261	chr6_72097946_72098342
GCCTGCAGGAGCCTACTTCT	Peak1261	chr6_72097946_72098342
GTGAGTCATATGTGTATATC	Peak1261	chr6_72097946_72098342
GAGGAAAGATGTGGGACTCA	Peak1262	chr6_81646575_81646790
GACCCAGCAATCCCATTACT	Peak1263	chr6_82310423_82310677
GAGATTGGATAAAGAAAATG	Peak1263	chr6_82310423_82310677
GTTAACAATTTCTGCTTCTG	Peak1264	chr6_82323478_82323687
GAGATCATGCACACTGTGGC	Peak1265	chr6_84761911_84762113
GCAGGAAGCGGCAGCTCCAC	Peak1265	chr6_84761911_84762113
GCCCTGAGCCTCACTCCCTG	Peak1265	chr6_84761911_84762113
GCCGGCCTGTCAGCACCCCA	Peak1265	chr6_84761911_84762113
GCGGGAATAGCAGACTCTGG	Peak1265	chr6_84761911_84762113
GGCCACCCACGCAGTGAGGG	Peak1265	chr6_84761911_84762113
GGCCCTGAGCCTCACTCCCT	Peak1265	chr6_84761911_84762113
GGCCGAGATCATGCACACTG	Peak1265	chr6_84761911_84762113
GGCGGGAATAGCAGACTCTG	Peak1265	chr6_84761911_84762113
GGCTGCCTCCCTCACTGCGT	Peak1265	chr6_84761911_84762113
GTGGCGGGAATAGCAGACTC	Peak1265	chr6_84761911_84762113
GTTCAAGAGAGAGCAGCTGC	Peak1265	chr6_84761911_84762113
GAAGAGCTCACTCATTCCCA	Peak1266	chr6_88088745_88088976
GAGGGGCGGGGACTAGTAGG	Peak1266	chr6_88088745_88088976
GAGTGAGCTCTTCCTCTCCC	Peak1266	chr6_88088745_88088976
GCCCCTCAACACCCTCACAC	Peak1266	chr6_88088745_88088976
GCTCACTCATTCCCATGGGA	Peak1266	chr6_88088745_88088976
GGGACTAGTAGGAGGTATTT	Peak1266	chr6_88088745_88088976
GGGGACTAGTAGGAGGTATT	Peak1266	chr6_88088745_88088976
GTAGGAGGTATTTGGGTCAT	Peak1266	chr6_88088745_88088976
GTGTGAGGGTGTTGAGGGGC	Peak1266	chr6_88088745_88088976
GTTGAGGGGCGGGGACTAGT	Peak1266	chr6_88088745_88088976
GACTTGAGAAAGTCTCCCCT	Peak1267	chr6_88591323_88591523
GAGGATGTAGTCTTTCCAAT	Peak1267	chr6_88591323_88591523
GATGTGCAGTCAATACCCAG	Peak1267	chr6_88591323_88591523
GGACTTGAGAAAGTCTCCCC	Peak1267	chr6_88591323_88591523
GGCTCCAGAAGAATAACTGC	Peak1267	chr6_88591323_88591523
GTTATTCTTCTGGAGCCCTG	Peak1267	chr6_88591323_88591523
GACACACCACAACCACATCC	Peak1268	chr6_88617409_88617598
GATGATCCAGGATGTGGTTG	Peak1268	chr6_88617409_88617598
GCATCTATGGTGTGGGGAAG	Peak1268	chr6_88617409_88617598
GCTTCTGATGATCCAGGATG	Peak1268	chr6_88617409_88617598
GCTTCCTGGCAGTTCCCAAG	Peak1269	chr6_89255076_89255238
GGTGCCTCTTGGGAACTGCC	Peak1269	chr6_89255076_89255238
GCAGCTGTCATCACTCTCCT	Peak127	chr1_238169655_238169829
GGAGAGTGATGACAGCTGCA	Peak127	chr1_238169655_238169829
GGGATTATTGATGATACCAG	Peak127	chr1_238169655_238169829
GAAAGTGACTTGTTCAAATA	Peak1270	chr6_90285109_90285523
GATTATATCCACAATGTGTC	Peak1270	chr6_90285109_90285523
GCCAGAGCCCAGATGAGAAC	Peak1270	chr6_90285109_90285523
GCTTGTTAGAGCATATTCCT	Peak1270	chr6_90285109_90285523
GGAAAGTGACTTGTTCAAAT	Peak1270	chr6_90285109_90285523
GGACATTCCAGTTCTCATCT	Peak1270	chr6_90285109_90285523
GTGACCTCATTTCCTCTCAA	Peak1270	chr6_90285109_90285523
GTTTCCCTTGAGAGGAAATG	Peak1270	chr6_90285109_90285523
GAGGAGGTCCTTAGGGGATT	Peak1271	chr6_99373801_99374072
GCCTGTGAGTGACACTTCAG	Peak1271	chr6_99373801_99374072
GTTATGCAAAACAGGCTTGT	Peak1271	chr6_99373801_99374072
GAAGTCGGCTTGTACTTCGA	Peak1273	chr6_99380389_99380581
GACTGTTAATAAAATAACAA	Peak1273	chr6_99380389_99380581
GAGATGGGGAATCGATGAGG	Peak1273	chr6_99380389_99380581
GCGGAGAGAAGCAGGATGGC	Peak1273	chr6_99380389_99380581
GGCAGGAGCTGCCGAGAAGT	Peak1273	chr6_99380389_99380581
GTGTGAGAGGTTCCAGGCTA	Peak1274	chr6_101961080_101961359
GAAACTGTGTCTCACAGAGG	Peak1275	chr6_105153130_105153282
GAAATCTTAAGAAAGGTATC	Peak1275	chr6_105153130_105153282
GAACAGCAGGATGTGGTCAG	Peak1275	chr6_105153130_105153282
GAGACACAGTTTCCTCAGGA	Peak1275	chr6_105153130_105153282
GAGGAAACTGTGTCTCACAG	Peak1275	chr6_105153130_105153282
GAGAATCAAAGAGACCAATG	Peak1276	chr6_106089462_106089652
GGATGAAGAATGGCCAGCTG	Peak1276	chr6_106089462_106089652
GTACACAGCACATCTGATGC	Peak1276	chr6_106089462_106089652
GATAAGACATGAGAACCCTA	Peak1277	chr6_106189090_106189411
GATTTCCCGTAGTGGCATCA	Peak1277	chr6_106189090_106189411
GGGACAACTCCAGCAGATCA	Peak1277	chr6_106189090_106189411
GTTACCATCTGATGGCTTTG	Peak1277	chr6_106189090_106189411
GAGACTCTCAGGAAGTTACC	Peak128	chr1_238643349_238643496
GTTCATTTCTCCTTCCATAC	Peak128	chr1_238643349_238643496
GTAGCATACACTAGCACACA	Peak1280	chr6_106311055_106311357
GAAGAGTGTCAGTAAGTGCG	Peak1281	chr6_106328260_106328360
GCCACCTTCCCAGCCTGTGC	Peak1281	chr6_106328260_106328360
GCGTGTGCTCCGGCACAGGC	Peak1281	chr6_106328260_106328360
GGGCGCGTGTGCTCCGGCAC	Peak1281	chr6_106328260_106328360
GTGAAGAGTGTCAGTAAGTG	Peak1281	chr6_106328260_106328360
GACAGAAATGTCTCTGCAGA	Peak1282	chr6_106340888_106341100
GAGGCAGTCAAAGCAGACAG	Peak1282	chr6_106340888_106341100
GATGAGTCATCAAAAGGACT	Peak1282	chr6_106340888_106341100
GTCAAAGCAGACAGAGGGAG	Peak1282	chr6_106340888_106341100
GAATTTCAACATTTGGCAGC	Peak1283	chr6_106341122_106341222
GCCAGTTTGAGTTTAGAGGC	Peak1283	chr6_106341122_106341222
GACCTATCTGCCAGGGCTCA	Peak1284	chr6_106341709_106341934
GAGAGTAAGACCTATCTGCC	Peak1284	chr6_106341709_106341934
GCAAGAAGGACTTGAAGAGG	Peak1284	chr6_106341709_106341934
GCCTCAGCTGAGAAGACTCA	Peak1284	chr6_106341709_106341934
GCCTTGAGTCTTCTCAGCTG	Peak1284	chr6_106341709_106341934
GCTGAGAAGACTCAAGGCTG	Peak1284	chr6_106341709_106341934
GCTGAGGTTGACTCAACAGC	Peak1284	chr6_106341709_106341934
GGCTTGGCTCCCTCCCAGCA	Peak1284	chr6_106341709_106341934
GTGCCGTATGTACGTGAACA	Peak1284	chr6_106341709_106341934
GTTCACGTACATACGGCACC	Peak1284	chr6_106341709_106341934
GCAGAGTATCAGTGATTTCC	Peak1286	chr6_106994416_106994516
GGCAGAGTATCAGTGATTTC	Peak1286	chr6_106994416_106994516
GAAATTCTTTGCATATGGAA	Peak1287	chr6_106994947_106995189
GACAAATCGAACAAAATATG	Peak1287	chr6_106994947_106995189
GCAAAGAATTTCAAAGGAAG	Peak1287	chr6_106994947_106995189
GGGAGCTACGTACACATACG	Peak1287	chr6_106994947_106995189
GTTCCATGAAAGTATCTCCC	Peak1288	chr6_106995512_106995622
GAATACATCTGGACAAGGAC	Peak1289	chr6_106995996_106996161
GAGCAGAGAATCTCAGATCT	Peak1289	chr6_106995996_106996161
GTAAGTTGTAAGTAGACTCT	Peak1289	chr6_106995996_106996161
GTACAGAATACATCTGGACA	Peak1289	chr6_106995996_106996161
GTCTACTTACAACTTACACT	Peak1289	chr6_106995996_106996161
GACTTGTTGGTGCTTAGAAT	Peak129	chr1_240314534_240314685
GCTCTGCTACTTATAGACTA	Peak129	chr1_240314534_240314685
GGATAGCACAGGAAACAGGC	Peak129	chr1_240314534_240314685
GTGGTTGGTGACAGATCTTA	Peak129	chr1_240314534_240314685
GAGACGGGGTTTCACCACGT	Peak1290	chr6_107095961_107096061
GGGGTTTCACCACGTTGGCC	Peak1290	chr6_107095961_107096061
GAAATCATCTTCAGTTGAAT	Peak1291	chr6_107096575_107096778
GACAGTTGCGGAGGATGGGA	Peak1291	chr6_107096575_107096778
GTGCTGCTGAACTAAACTGT	Peak1292	chr6_107097416_107097516
GAAGTAAAATTGTAACTCTA	Peak1293	chr6_107114599_107114903
GCATGATTCTGGGCCCTGAC	Peak1293	chr6_107114599_107114903
GGAAGAGGAACTTTGAGCAC	Peak1293	chr6_107114599_107114903
GGAGGAAATGCAACCAGTCA	Peak1293	chr6_107114599_107114903
GGGGAGGAGCTCCACTTGCA	Peak1293	chr6_107114599_107114903
GTAAAATTGTAACTCTAAGG	Peak1293	chr6_107114599_107114903
GTCATTTCAGCTCTTTCTTA	Peak1293	chr6_107114599_107114903
GTTGTTCTGGCTTCTAGGCA	Peak1293	chr6_107114599_107114903
GCTCACTCATGCATAGAGCC	Peak1294	chr6_107871819_107871922
GGGCTGGGTAAGTCACCCTG	Peak1294	chr6_107871819_107871922
GGGTGACTTACCCAGCCCAG	Peak1294	chr6_107871819_107871922
GAGGAAGAGGTCACAGTCTC	Peak1296	chr6_109438697_109438891
GCTCTAAACTAGTACAGATT	Peak1296	chr6_109438697_109438891
GGAAGAGGTCACAGTCTCAG	Peak1296	chr6_109438697_109438891
GACAGCCCTGAGTTCCTAAC	Peak1297	chr6_109561920_109562153
GAGGAAGAAATCATTACTCA	Peak1297	chr6_109561920_109562153
GAGTAATGATTTCTTCCTCT	Peak1297	chr6_109561920_109562153
GATGTGGTGCAGGACCCTGA	Peak1297	chr6_109561920_109562153
GGATGCAAGAACATCTGGCT	Peak1297	chr6_109561920_109562153
GGTTTCCTGTTAGGAACTCA	Peak1297	chr6_109561920_109562153
GTTCCTAACAGGAAACCACT	Peak1297	chr6_109561920_109562153
GACTTGAAGTGGGGATGAAA	Peak1298	chr6_109793605_109793739
GAGTTTGCTGGAATTATAGT	Peak1298	chr6_109793605_109793739
GCTCAGGCAACAGAACCAAG	Peak1298	chr6_109793605_109793739
GGTTCTGTTGCCTGAGCATA	Peak1298	chr6_109793605_109793739
GTAGCAGTAGGACTTGAAGT	Peak1298	chr6_109793605_109793739
GTTCTGTTGCCTGAGCATAA	Peak1298	chr6_109793605_109793739
GTTTGCTGGAATTATAGTGG	Peak1298	chr6_109793605_109793739
GAGAGATGCAGCCAGAGCTC	Peak1299	chr6_109793761_109793896
GCACATGTGCCTGCAAATAG	Peak1299	chr6_109793761_109793896
GCGCTGTGCTGAGTTCCCTA	Peak1299	chr6_109793761_109793896
GGAGGAGCGTGGAGCTGGCT	Peak1299	chr6_109793761_109793896
GGCGCTGTGCTGAGTTCCCT	Peak1299	chr6_109793761_109793896
GTGGTGGAGGAGCGTGGAGC	Peak1299	chr6_109793761_109793896
GTTCCCTAGGGAGACAGCGG	Peak1299	chr6_109793761_109793896
GAAGGTTTCACATGAAGCAT	Peak13	chr1_11901355_11901669
GAATGACGTCACTGAACGAC	Peak13	chr1_11901355_11901669
GACGTCATTCTTCTCCAGGC	Peak13	chr1_11901355_11901669
GACTAATACCATGTAGAAGG	Peak13	chr1_11901355_11901669
GCACAGGAGGCCCTCCTGAA	Peak13	chr1_11901355_11901669
GCCAAAGCACGTCTGCCCCA	Peak13	chr1_11901355_11901669
GGAGGGCCTCCTGTGCCGCA	Peak13	chr1_11901355_11901669
GGCACAGGAGGCCCTCCTGA	Peak13	chr1_11901355_11901669
GGCACCCAAAGTGAGCATCT	Peak13	chr1_11901355_11901669
GGCCTCCTGTGCCGCAGGGA	Peak13	chr1_11901355_11901669
GGGCCTCCTGTGCCGCAGGG	Peak13	chr1_11901355_11901669
GTGCCGCAGGGAGGGTGCGT	Peak13	chr1_11901355_11901669
GAAGCTCCAGTGCCAGTCCC	Peak130	chr1_243174082_243174209
GAGCTTCCCCACAGGAGCTG	Peak130	chr1_243174082_243174209
GCTCCAGTGCCAGTCCCTGG	Peak130	chr1_243174082_243174209
GTTCAGGAACTAACTGAAAA	Peak130	chr1_243174082_243174209
GTATGCTGCGTGCCTCCCAC	Peak1300	chr6_110864577_110864677
GTTCTAGACGTCTCCAGGTG	Peak1300	chr6_110864577_110864677
GAACTTCCTCACCTGCCACC	Peak1301	chr6_110864728_110864933
GAAGGAAAGTTCGTTCTTAA	Peak1301	chr6_110864728_110864933
GAGCCACTTCCACTTGCTCC	Peak1301	chr6_110864728_110864933
GCAAGTGGAAGTGGCTCTAT	Peak1301	chr6_110864728_110864933
GCACAGGAAGGAAACTGTCA	Peak1301	chr6_110864728_110864933
GCAGCACCAGGTGGCAGGTG	Peak1301	chr6_110864728_110864933
GGACATGTAGCAGCACCAGG	Peak1301	chr6_110864728_110864933
GGAGAGAGAACTCTGTGGCC	Peak1301	chr6_110864728_110864933
GGCAGGTGAGGAAGTTCCAG	Peak1301	chr6_110864728_110864933
GGCGATACTATTGCACAGGA	Peak1301	chr6_110864728_110864933
GTGTGGTAGGTCAGCAGAGA	Peak1301	chr6_110864728_110864933
GAATTGTTTATTTACTCTAG	Peak1302	chr6_110881959_110882146
GAGCCTCAAACAGGAAGGAA	Peak1302	chr6_110881959_110882146
GTAAATAAACAATTCTCTTG	Peak1302	chr6_110881959_110882146
GAGACAGAGAGGGCAGGGCA	Peak1303	chr6_110883027_110883242
GAGAGAGAGACAGAGAGGGC	Peak1303	chr6_110883027_110883242
GCCATGCACATGAGTGAGCT	Peak1303	chr6_110883027_110883242
GGCCTCAGTTCCTTGCCATG	Peak1303	chr6_110883027_110883242
GTCTCTGATGACTTAGCCTT	Peak1303	chr6_110883027_110883242
GACGGAGGCTGGGGAACCTG	Peak1304	chr6_111896775_111897027
GCAGCTGGGGACGGAGGCTG	Peak1304	chr6_111896775_111897027
GGAGCACCAGCTCTATTAGG	Peak1304	chr6_111896775_111897027
GGCACAGCAGCTGGGGACGG	Peak1304	chr6_111896775_111897027
GGGCACTCCAAGGACTCCCC	Peak1304	chr6_111896775_111897027
GGGGTCTAGGCACAGCAGCT	Peak1304	chr6_111896775_111897027
GGGTCTAGGCACAGCAGCTG	Peak1304	chr6_111896775_111897027
GCATGCGTCTGCCGCTTCTG	Peak1305	chr6_111897541_111897713
GCCGCTTCTGTGGTTTCTGT	Peak1305	chr6_111897541_111897713
GACATGCTGTCCTGCAGCAG	Peak1306	chr6_112013123_112013278
GGAAACGTGAGGACCAAGCA	Peak1306	chr6_112013123_112013278
GGACCAAGCAGGGAAACAAT	Peak1306	chr6_112013123_112013278
GAGCCTCACTCCAGTGAATA	Peak1307	chr6_112013645_112013745
GAGTGAGGCTCCTCAGGCTG	Peak1307	chr6_112013645_112013745
GCGAGGGTGCCAATCACCTA	Peak1307	chr6_112013645_112013745
GCTCCTCAGGCTGTGGCCCT	Peak1307	chr6_112013645_112013745
GAGTTCAAAGTCCAGGAAAA	Peak1308	chr6_112013761_112013917
GGGTAAATGAAAAGGTTGCC	Peak1308	chr6_112013761_112013917
GGTTAACGCTCATGAACCAT	Peak1308	chr6_112013761_112013917
GAACACTCTCATGGGGCCTC	Peak1309	chr6_112271925_112272124
GCAGCCAGCTGGAGCTAGGT	Peak1309	chr6_112271925_112272124
GCTACTTGCCAGGCAGAGCG	Peak1309	chr6_112271925_112272124
GCTCTGCCTGGCAAGTAGCC	Peak1309	chr6_112271925_112272124
GGCAAGTAGCCAGGTTGGCA	Peak1309	chr6_112271925_112272124
GGCAGCCAGCTGGAGCTAGG	Peak1309	chr6_112271925_112272124
GGGGTAGGAACACTCTCATG	Peak1309	chr6_112271925_112272124
GGGGTCTGTGCTCCATTGTA	Peak1309	chr6_112271925_112272124
GGGTCTGTGCTCCATTGTAT	Peak1309	chr6_112271925_112272124
GGTTGGCAGGGTCCCTGCTG	Peak1309	chr6_112271925_112272124
GAGTCAGACATCGAGCAGCT	Peak131	chr1_243277368_243277704
GCTGCTCGATGTCTGACTCC	Peak131	chr1_243277368_243277704
GCTTTGAACCACAAAACCCC	Peak131	chr1_243277368_243277704
GGGTGGAAGCTGTTTGGATT	Peak131	chr1_243277368_243277704
GGTGGAAGCTGTTTGGATTA	Peak131	chr1_243277368_243277704
GTTTGGATTAGGGTCCCCAG	Peak131	chr1_243277368_243277704
GAAAAGGAGGCGAGTTTCCA	Peak1310	chr6_112823049_112823235
GAAGCTGAGCTTGGTAACTG	Peak1310	chr6_112823049_112823235
GAGCTTGGTAACTGGGGAGG	Peak1310	chr6_112823049_112823235
GAGGAAGGGAGCACGGAAAG	Peak1310	chr6_112823049_112823235
GCACGGAAAGTGGAAATGGA	Peak1310	chr6_112823049_112823235
GCATCTTCCCAAGGGAGGAA	Peak1310	chr6_112823049_112823235
GCGAGTTTCCATGGCAACGC	Peak1310	chr6_112823049_112823235
GCTGAGCTTGGTAACTGGGG	Peak1310	chr6_112823049_112823235
GGGAGCACGGAAAGTGGAAA	Peak1310	chr6_112823049_112823235
GCAAACCCCTGGGGAAGATT	Peak1311	chr6_114076831_114077112
GCTTCCCCAGGGACTCCTCT	Peak1311	chr6_114076831_114077112
GCTTGCAATGCAAACCCCTG	Peak1311	chr6_114076831_114077112
GGAAGATTTGGAGGATTAGC	Peak1311	chr6_114076831_114077112
GGCTTGCAATGCAAACCCCT	Peak1311	chr6_114076831_114077112
GGGGTGACTGCTTGCTTGGA	Peak1311	chr6_114076831_114077112
GTCCCTGGGGAAGCAGAGTC	Peak1311	chr6_114076831_114077112
GTCCTGACTCTGCTTCCCCA	Peak1311	chr6_114076831_114077112
GTGAGCCTAGAGGAGTCCCT	Peak1311	chr6_114076831_114077112
GTTCTGATCTTCCATCTTCT	Peak1311	chr6_114076831_114077112
GAGAGTTTCAGAGGCAGTTA	Peak1312	chr6_114130957_114131171
GGAAAGACATAGGTAGATAG	Peak1312	chr6_114130957_114131171
GTTCAAAGCTAAAGTGAGCT	Peak1312	chr6_114130957_114131171
GAGCATCCATGCAGGACAAA	Peak1313	chr6_116760083_116760274
GTTGAGTGAGGTTAAGTAAA	Peak1313	chr6_116760083_116760274
GGAAGCCAGGCTGCTGTCTC	Peak1314	chr6_119468629_119468833
GGGTTATTTATTGTACATAA	Peak1314	chr6_119468629_119468833
GGTTATTTATTGTACATAAG	Peak1314	chr6_119468629_119468833
GTTATTTATTGTACATAAGG	Peak1314	chr6_119468629_119468833
GTTCGAGCAGGCTGACTTCC	Peak1314	chr6_119468629_119468833
GAAATGAATCATACGGCATC	Peak1315	chr6_119854861_119854994
GATTTGTTTAAAACCCCTAG	Peak1315	chr6_119854861_119854994
GCATCTGGGGAAGTGCCTCT	Peak1315	chr6_119854861_119854994
GTACTTCCCCAGTAACAAGC	Peak1317	chr6_130436210_130436448
GTTCACTCCTTAGTTTGGCT	Peak1317	chr6_130436210_130436448
GTACAACTGTAGTCTTGTGC	Peak1318	chr6_132395382_132395482
GTCATCTGTCTTGTCAACAT	Peak1318	chr6_132395382_132395482
GAAGAGGAAGTGGTGGTGGG	Peak1319	chr6_132675669_132676011
GACAAACGCTATATACTCTT	Peak1319	chr6_132675669_132676011
GAGATGAAATGGGCTCTGTG	Peak1319	chr6_132675669_132676011
GAGCTCAGACTCTCCTTGGA	Peak1319	chr6_132675669_132676011
GAGGTGGCAGGGAGATGAAA	Peak1319	chr6_132675669_132676011
GCAGCTGCTGTGGGGAATGG	Peak1319	chr6_132675669_132676011
GCGTTTGTCTTCAGCTACCA	Peak1319	chr6_132675669_132676011
GCTACCAGGGTGGGTAGGGA	Peak1319	chr6_132675669_132676011
GCTGCAGCAAGACCCTTCCA	Peak1319	chr6_132675669_132676011
GCTGCAGCTGCTGTGGGGAA	Peak1319	chr6_132675669_132676011
GGAAAGTGCCACCTCCTGGC	Peak1319	chr6_132675669_132676011
GGGTCTTGCTGCAGCTGCTG	Peak1319	chr6_132675669_132676011
GGGTGAGGTTCCCAGGTCAA	Peak1319	chr6_132675669_132676011
GGTAGGGAAGGCCCATCAGG	Peak1319	chr6_132675669_132676011
GTACGAAGAGGAAGTGGTGG	Peak1319	chr6_132675669_132676011
GTAGGGAAGGCCCATCAGGT	Peak1319	chr6_132675669_132676011
GTGCTGGTTGGCGTCCTGCC	Peak1319	chr6_132675669_132676011
GTGGGTAGGGAAGGCCCATC	Peak1319	chr6_132675669_132676011
GTGGTACGAAGAGGAAGTGG	Peak1319	chr6_132675669_132676011
GTGGTGGTACGAAGAGGAAG	Peak1319	chr6_132675669_132676011
GTTGGCGTCCTGCCAGGAGG	Peak1319	chr6_132675669_132676011
GACCAGCCCTTCAGATTGTG	Peak1320	chr6_132676089_132676189
GATTGTGTGGGAGCTGAGTG	Peak1320	chr6_132676089_132676189
GCCTGGAAACAGGATGTTGG	Peak1320	chr6_132676089_132676189
GAGAGAGAGAGAAAGCAAGG	Peak1321	chr6_133992567_133992695
GATTGGAGGCTTCCTTCCTG	Peak1321	chr6_133992567_133992695
GCACATCACAGGGCAAAAGC	Peak1321	chr6_133992567_133992695
GCATAGTAGCATCTGTCTCT	Peak1321	chr6_133992567_133992695
GTGAGAGAGAGAGAAAGCAA	Peak1321	chr6_133992567_133992695
GGGATGTCTTCAGATCATGA	Peak1322	chr6_134609093_134609335
GGGCTAAACATGACTCAGAC	Peak1322	chr6_134609093_134609335
GTCACATCTTAGGTTAGGTA	Peak1322	chr6_134609093_134609335
GAATGATGCTTTATGAGTGA	Peak1324	chr6_134609999_134610254
GGAGGGAGCATTAGGACAGG	Peak1324	chr6_134609999_134610254
GTGGTTTCTCACTGTATCTG	Peak1324	chr6_134609999_134610254
GCAGAAACAAAGAAATTGTT	Peak1325	chr6_134654696_134654938
GGTCCCAGGTGGTACAAAAT	Peak1325	chr6_134654696_134654938
GAGTCAGCACGTCTCCCTGA	Peak1326	chr6_134694658_134694799
GCTGACTCACAGTCAGCCTC	Peak1326	chr6_134694658_134694799
GAGAGCTGGAAACTATGCTG	Peak1327	chr6_134838540_134838759
GCAGACACAATCTGAAGTGG	Peak1327	chr6_134838540_134838759
GCAGATTGCTGGAATTGCTG	Peak1327	chr6_134838540_134838759
GCGGCAGCCAGCTCCCAAAG	Peak1327	chr6_134838540_134838759
GCTGAGTTCTGAAAGCCCTC	Peak1327	chr6_134838540_134838759
GTCGCAGACACAATCTGAAG	Peak1327	chr6_134838540_134838759
GTGCGGCAGCCAGCTCCCAA	Peak1327	chr6_134838540_134838759
GAGGAACTGGGGCTTCTTGG	Peak1328	chr6_137424212_137424424
GGGTGCTGCTAAAAGACACC	Peak1328	chr6_137424212_137424424
GGTTTGGCCCTTCAGACACC	Peak1328	chr6_137424212_137424424
GTCTTTCTTTAGAGGAACTG	Peak1328	chr6_137424212_137424424
GTTCTCAGGGGATTTCTTAG	Peak1328	chr6_137424212_137424424
GAGGAAGTTCTCATGACTCA	Peak133	chr1_243658282_243658460
GATGACAAACTCAGACCCCA	Peak133	chr1_243658282_243658460
GGTGACACTGTCTGTCCTTT	Peak133	chr1_243658282_243658460
GCAGCCTGGTGCCCTTGGGT	Peak1330	chr6_138876504_138876705
GCTTCTATTGCTTTCGAGGC	Peak1330	chr6_138876504_138876705
GGCTGCAGCCTGGTGCCCTT	Peak1330	chr6_138876504_138876705
GGCTGCAGCCTTTCTTTGTT	Peak1330	chr6_138876504_138876705
GCAACATCCGGGTGCTGATG	Peak1331	chr6_139435985_139436113
GCACATGTAGGGATAACAGC	Peak1331	chr6_139435985_139436113
GCTGGCACGGGGATATTAAT	Peak1331	chr6_139435985_139436113
GTAGGGATAACAGCTGGCAC	Peak1331	chr6_139435985_139436113
GTGCAACATCCGGGTGCTGA	Peak1331	chr6_139435985_139436113
GTGTTCTCCCCATCAGCACC	Peak1331	chr6_139435985_139436113
GATGGTAGCTGAGCTAAATA	Peak1332	chr6_143036780_143036966
GCCTATGATTGGAACCTTGG	Peak1332	chr6_143036780_143036966
GCCTCCAAGGTTCCAATCAT	Peak1332	chr6_143036780_143036966
GCTGAGCTAAATATGGAGAC	Peak1332	chr6_143036780_143036966
GGTGCCTATGATTGGAACCT	Peak1332	chr6_143036780_143036966
GAGAGAGGAAGCAGGGGTGG	Peak1333	chr6_143037358_143037534
GATTAATGCCTTCCTGGAGG	Peak1333	chr6_143037358_143037534
GGACCTAATGGGAGGTGTTT	Peak1333	chr6_143037358_143037534
GGGACCTAATGGGAGGTGTT	Peak1333	chr6_143037358_143037534
GTGTTGGAGGTGGGACCTAA	Peak1333	chr6_143037358_143037534
GAAATACCACCACTGAGCTG	Peak1334	chr6_149093168_149093388
GAGCTGAACCTTTACAGTTT	Peak1334	chr6_149093168_149093388
GCCTGGTGGTTTCTCTTTAT	Peak1334	chr6_149093168_149093388
GCTCAGTGGTGGTATTTCCC	Peak1334	chr6_149093168_149093388
GTAGGACACCTAAACTGTAA	Peak1334	chr6_149093168_149093388
GAAGTTGGGCTGTGATGGGG	Peak1335	chr6_149387305_149387540
GAGAAAAGATGAAAGAGGGA	Peak1335	chr6_149387305_149387540
GAGAGAGAAAAGATGAAAGA	Peak1335	chr6_149387305_149387540
GAGGGAGGGTGCATGAGACA	Peak1335	chr6_149387305_149387540
GGAGAGAGAAAAGATGAAAG	Peak1335	chr6_149387305_149387540
GTAACTGAATGGAGTACAGA	Peak1335	chr6_149387305_149387540
GTACAGAAGGAACAGAAAGC	Peak1335	chr6_149387305_149387540
GACGGGTACACAGACTGGTC	Peak1336	chr6_149578954_149579145
GAGCACTGGCTCCATCCAAG	Peak1336	chr6_149578954_149579145
GAGCTACACTTTCTCTCATG	Peak1336	chr6_149578954_149579145
GCAACTCTAAGAAAGAGCAC	Peak1336	chr6_149578954_149579145
GAAGGCCTCTGCCCCTAGGC	Peak1337	chr6_149929772_149929998
GACTGTGGCGGGGAGGGGTG	Peak1337	chr6_149929772_149929998
GATGTCCAGTGACTGTGGCG	Peak1337	chr6_149929772_149929998
GCAGCTCAGCAGTAATGAGA	Peak1337	chr6_149929772_149929998
GCCTCTGTCGGCACCTGCCT	Peak1337	chr6_149929772_149929998
GGGACACTGTGGTTGGGGAG	Peak1337	chr6_149929772_149929998
GGTGCCGACAGAGGCTGGCT	Peak1337	chr6_149929772_149929998
GTCCAGTGACTGTGGCGGGG	Peak1337	chr6_149929772_149929998
[truncated: 9,140 more rows]
