# Supplementary material for: Epigenomic profiling of glucocorticoid responses identifies cis-regulatory disruptions impacting steroid resistance in childhood acute lymphoblastic leukemia
Source: Leukemia. Author manuscript; Available in PMC 2022 Oct 4. (PMC9522591; doi:10.1038/s41375-022-01685-z)
Supplement: 1833642_Sup_Tab_4 [file NIHMS1833642-supplement-1833642_Sup_Tab_4.xlsx]

## Sheet: Supplementary Table 4
Supplementary Table 4. 697 sgRNA read counts
sgRNA No.	Peak No.	PRED1	CTRL1	PRED2	CTRL2	PRED3	CTRL3
gRNA1389	Peak50	570	3348	1175	1589	748	2549
gRNA31493	Peak1355	461	930	514	407	926	720
gRNA6306	Peak266	44	693	11	299	124	571
gRNA36141	Peak1569	25	480	117	258	76	275
gRNA19172	Peak787	98	851	774	291	453	834
gRNA36329	Peak1581	0	29	0	9	0	53
gRNA25859	Peak1074	4303	496	1488	176	6174	312
gRNA32992	Peak1423	0	78	0	11	0	39
gRNA39818	Peak1723	0	118	0	55	0	34
gRNA17695	Peak735	292	1238	153	379	531	953
gRNA39196	Peak1690	25	443	9	189	55	261
gRNA32910	Peak1418	0	0	0	0	0	0
gRNA14601	Peak597	79	844	172	332	108	703
gRNA30471	Peak1310	263	1225	173	401	526	805
gRNA25111	Peak1038	14	54	2	19	0	50
gRNA39197	Peak1690	0	0	0	0	0	0
gRNA1431	Peak54	242	969	93	413	103	682
gRNA7984	Peak324	0	141	7	28	0	65
gRNA14954	Peak615	88	677	6	291	59	507
gRNA35715	Peak1550	837	750	732	380	837	713
gRNA1692	Peak65	217	2487	219	1090	543	1993
gRNA36504	Peak1588	556	560	433	341	444	533
gRNA32266	Peak1387	169	751	39	277	182	569
gRNA2672	Peak110	17	403	30	193	82	320
gRNA7694	Peak309	260	468	344	294	1092	312
gRNA33805	Peak1457	91	219	460	104	227	215
gRNA16093	Peak662	37	584	12	141	67	476
gRNA26959	Peak1127	4	447	3	298	17	342
gRNA16859	Peak693	0	11	0	11	0	1
gRNA9766	Peak406	20	201	8	148	36	194
gRNA15104	Peak622	135	1059	185	457	216	789
gRNA24120	Peak986	0	61	1	20	1	147
gRNA10189	Peak424	1	315	17	194	25	386
gRNA4953	Peak209	210	969	103	454	341	715
gRNA36549	Peak1591	1	23	0	33	4	36
gRNA9192	Peak375	1010	1596	1317	733	2649	1335
gRNA2998	Peak123	594	2260	677	1196	926	1811
gRNA26927	Peak1126	100	855	30	358	137	533
gRNA4118	Peak179	21	1110	22	511	29	916
gRNA37477	Peak1619	115	1263	201	503	363	848
gRNA7968	Peak323	102	521	200	196	176	366
gRNA11310	Peak462	8	282	55	53	98	137
gRNA22424	Peak915	2	68	0	70	0	58
gRNA23973	Peak978	71	304	79	205	268	290
gRNA24260	Peak997	31	255	180	32	49	232
gRNA20428	Peak847	2	110	8	16	33	45
gRNA14796	Peak608	0	299	0	106	0	147
gRNA27235	Peak1144	49	983	54	475	144	849
gRNA11150	Peak457	73	648	23	365	40	423
gRNA21848	Peak895	0	0	0	0	0	0
gRNA4184	Peak181	173	1206	30	500	88	840
gRNA13352	Peak543	9700	390	10692	140	17593	328
gRNA466	Peak14	300	2985	458	1214	640	2088
gRNA38027	Peak1645	9	182	5	109	0	95
gRNA14335	Peak586	62	1175	12	649	199	968
gRNA1446	Peak57	42	250	15	106	25	147
gRNA36596	Peak1593	147	469	98	227	147	466
gRNA9476	Peak387	781	912	1306	411	835	723
gRNA23951	Peak977	2	42	0	8	0	22
gRNA39039	Peak1683	50	513	33	342	212	639
gRNA34693	Peak1506	58	1000	58	524	49	735
gRNA1041	Peak33	9	176	3	61	35	113
gRNA3503	Peak150	0	0	0	0	0	0
gRNA11201	Peak459	8	146	5	88	0	186
gRNA19737	Peak818	3	474	16	159	37	193
gRNA27221	Peak1144	238	605	307	368	488	639
gRNA34079	Peak1469	232	1803	206	746	237	1498
gRNA14563	Peak595	0	261	6	93	4	220
gRNA5238	Peak221	70	1200	431	383	388	734
gRNA36045	Peak1565	0	26	0	18	0	7
gRNA25081	Peak1036	45	283	78	129	105	253
gRNA13216	Peak538	8	222	8	107	23	272
gRNA29930	Peak1275	8	267	2	89	1	168
gRNA19321	Peak795	7	159	16	88	0	171
gRNA15186	Peak626	124	1624	78	869	201	1112
gRNA7007	Peak288	1	210	1	66	7	107
gRNA14739	Peak604	115	1302	143	624	176	1066
gRNA27402	Peak1153	1	47	0	35	0	44
gRNA11473	Peak469	67	916	161	399	333	623
gRNA17020	Peak702	79	1855	71	752	169	1274
gRNA9444	Peak385	30	379	3	139	73	201
gRNA23357	Peak955	201	741	738	300	574	641
gRNA1498	Peak59	11	300	0	249	0	262
gRNA26942	Peak1126	0	29	0	7	0	6
gRNA7307	Peak294	48	927	87	425	47	504
gRNA6865	Peak283	50	601	37	268	30	398
gRNA7324	Peak294	27	1263	24	472	42	745
gRNA8093	Peak330	0	0	0	0	0	14
gRNA9538	Peak390	47	630	99	242	147	490
gRNA37149	Peak1609	1909	1058	3532	486	3735	676
gRNA26595	Peak1110	0	78	29	33	40	24
gRNA36137	Peak1569	426	1048	508	536	443	669
gRNA22874	Peak933	2	368	0	153	0	249
gRNA29326	Peak1241	48	878	142	541	137	754
gRNA29012	Peak1228	99	652	51	291	121	424
gRNA463	Peak14	0	55	0	46	0	76
gRNA6077	Peak256	7	294	0	108	6	137
gRNA39217	Peak1691	18	429	7	157	15	391
gRNA26104	Peak1091	22	664	13	338	81	584
gRNA38986	Peak1682	20	37	12	46	7	108
gRNA24964	Peak1034	93	1771	113	898	103	1598
gRNA6697	Peak280	11	200	8	109	6	338
gRNA10685	Peak440	23	458	48	186	66	202
gRNA37283	Peak1614	0	0	0	0	0	0
gRNA23423	Peak958	33	361	51	162	32	254
gRNA11157	Peak458	9	658	35	331	30	448
gRNA17617	Peak732	319	1488	241	586	340	1083
gRNA11512	Peak470	197	1535	164	610	312	1251
gRNA20954	Peak867	28	698	100	432	44	438
gRNA10370	Peak431	0	55	0	16	0	1
gRNA18284	Peak752	19	224	16	118	26	136
gRNA7995	Peak324	0	242	0	85	0	97
gRNA4518	Peak193	0	2	0	3	0	0
gRNA34279	Peak1481	14	185	3	50	44	90
gRNA18720	Peak765	124	319	55	107	78	257
gRNA2669	Peak110	8	465	8	116	39	313
gRNA17359	Peak723	185	249	183	113	79	296
gRNA24983	Peak1034	309	212	210	163	594	172
gRNA23290	Peak950	26	1032	38	667	53	1103
gRNA11608	Peak476	3355	2838	2285	1284	2847	2172
gRNA10332	Peak429	199	1041	72	443	212	709
gRNA29047	Peak1229	177	784	50	257	90	383
gRNA29856	Peak1270	208	563	113	213	244	349
gRNA2113	Peak85	1713	4308	1631	1661	2202	3442
gRNA17580	Peak731	38	657	137	316	209	416
gRNA15749	Peak645	212	313	305	176	515	303
gRNA18754	Peak768	204	1507	153	662	307	1167
gRNA33839	Peak1458	203	1721	272	638	234	1689
gRNA17733	Peak736	91	434	556	267	924	256
gRNA7819	Peak315	33	352	1	235	20	320
gRNA33324	Peak1436	1	145	11	68	5	66
gRNA39816	Peak1723	0	0	0	0	0	0
gRNA16310	Peak670	83	430	31	315	67	320
gRNA30867	Peak1334	260	513	104	287	210	420
gRNA9350	Peak382	677	905	310	486	1067	771
gRNA1380	Peak49	31	654	26	296	40	455
gRNA38521	Peak1666	418	1959	586	943	606	1527
gRNA37404	Peak1616	201	348	370	121	305	301
gRNA39270	Peak1693	28	423	26	164	29	289
gRNA21651	Peak887	50	611	51	241	83	372
gRNA2948	Peak122	1880	435	1174	288	1228	428
gRNA30133	Peak1291	138	393	67	204	235	318
gRNA9208	Peak376	0	0	0	0	0	0
gRNA25517	Peak1056	8	501	2	268	36	437
gRNA24082	Peak984	1	41	2	52	5	43
gRNA27717	Peak1168	2	454	10	127	54	333
gRNA29921	Peak1275	4	129	3	64	4	116
gRNA27244	Peak1146	86	344	50	180	136	308
gRNA20048	Peak832	61	666	3	293	54	469
gRNA26901	Peak1124	2	501	30	229	55	355
gRNA30558	Peak1315	598	1812	909	713	2003	1046
gRNA19884	Peak825	157	1065	51	472	261	858
gRNA27678	Peak1165	0	4	0	4	0	12
gRNA35552	Peak1544	372	1325	406	416	427	689
gRNA38965	Peak1682	57	739	217	349	302	463
gRNA27982	Peak1182	46	327	15	185	39	274
gRNA9034	Peak369	278	2127	159	1170	338	1819
gRNA17206	Peak710	97	1532	152	612	105	1158
gRNA35065	Peak1527	298	1136	496	642	1169	840
gRNA24216	Peak992	47	424	32	219	62	368
gRNA19505	Peak811	127	622	53	316	99	494
gRNA26108	Peak1091	36	252	30	223	9	214
gRNA37552	Peak1623	213	375	127	311	269	327
gRNA12307	Peak502	11	1350	3	467	36	801
gRNA17784	Peak738	66	202	78	85	79	160
gRNA5174	Peak218	107	2021	112	862	198	1270
gRNA30093	Peak1287	7	270	11	112	8	264
gRNA37374	Peak1616	0	10	0	0	0	0
gRNA25086	Peak1037	339	1500	203	804	213	1267
gRNA38031	Peak1645	72	723	65	286	53	723
gRNA14500	Peak591	113	386	130	154	216	199
gRNA3701	Peak162	46	389	31	147	19	344
gRNA20811	Peak863	0	227	2	46	1	68
gRNA3167	Peak134	1	70	0	55	0	80
gRNA31301	Peak1350	322	412	535	398	302	433
gRNA4039	Peak177	2064	2248	2305	1035	2312	1770
gRNA28458	Peak1204	45	2120	61	857	61	1716
gRNA34521	Peak1497	1579	819	1630	342	2021	583
gRNA37332	Peak1615	1564	599	4431	336	3984	447
gRNA27361	Peak1151	268	2371	408	1014	523	1979
gRNA15768	Peak646	579	689	456	389	869	493
gRNA23896	Peak974	451	637	308	256	175	509
gRNA29208	Peak1235	75	713	64	379	97	472
gRNA30456	Peak1309	35	636	49	238	87	426
gRNA7913	Peak320	76	401	48	170	157	267
gRNA31484	Peak1355	106	839	59	283	138	654
gRNA4036	Peak177	52	579	62	269	297	430
gRNA25795	Peak1071	193	620	253	275	295	329
gRNA29917	Peak1275	0	81	3	49	0	150
gRNA27750	Peak1170	24	396	5	176	16	419
gRNA6040	Peak254	332	1305	536	460	337	890
gRNA9203	Peak376	605	1481	1101	698	1282	1019
gRNA34213	Peak1476	992	1515	1136	491	1889	911
gRNA20333	Peak844	0	12	0	7	0	7
gRNA3989	Peak173	46	559	2	290	48	486
gRNA10248	Peak426	423	1707	286	691	304	1112
gRNA8068	Peak328	65	816	215	462	223	774
gRNA23523	Peak960	421	1484	408	853	532	1553
gRNA33505	Peak1444	97	275	16	185	23	225
gRNA10349	Peak430	42	756	69	439	55	694
gRNA22466	Peak917	0	32	0	7	0	0
gRNA23074	Peak941	120	1622	295	573	549	1276
gRNA31996	Peak1372	27	429	16	148	51	229
gRNA3875	Peak168	28	788	12	393	34	497
gRNA29173	Peak1234	115	1110	206	439	355	1010
gRNA18757	Peak768	1	205	0	66	0	170
gRNA16630	Peak681	732	1640	1256	684	1310	1350
gRNA15337	Peak631	37	38	183	29	61	45
gRNA18918	Peak776	14	511	9	386	23	541
gRNA10529	Peak433	129	395	51	200	126	327
gRNA2891	Peak121	6	958	12	365	41	698
gRNA18234	Peak751	63	397	30	162	54	472
gRNA37428	Peak1617	28	776	32	372	92	472
gRNA34382	Peak1487	211	983	484	487	798	680
gRNA10777	Peak443	0	142	0	83	0	170
gRNA13986	Peak569	7	256	43	105	13	230
gRNA4171	Peak181	187	1052	320	413	373	882
gRNA4008	Peak174	49	704	75	361	23	602
gRNA34018	Peak1466	143	630	131	317	134	496
gRNA26433	Peak1103	7	58	6	80	0	36
gRNA3812	Peak167	0	345	6	250	9	338
gRNA20989	Peak868	136	635	193	292	339	445
gRNA33312	Peak1435	189	1462	290	614	716	1050
gRNA20906	Peak866	31	684	10	256	66	466
gRNA34664	Peak1503	538	2191	1005	1050	867	1903
gRNA1777	Peak69	323	1963	311	949	322	1404
gRNA13618	Peak555	11	2950	22	1300	39	2023
gRNA3425	Peak145	0	21	0	13	0	34
gRNA15770	Peak646	901	1597	232	785	525	1243
gRNA19224	Peak791	167	591	236	211	245	530
gRNA15295	Peak630	7	130	3	71	0	164
gRNA27184	Peak1143	61	599	43	232	78	356
gRNA22952	Peak936	18	1005	47	435	44	770
gRNA27433	Peak1154	2	291	10	129	53	219
gRNA38749	Peak1675	102	533	66	275	121	520
gRNA25303	Peak1046	452	804	513	479	965	534
gRNA26150	Peak1094	186	1065	120	575	387	997
gRNA9144	Peak374	536	634	435	237	1144	504
gRNA19740	Peak819	80	1217	99	518	118	869
gRNA14894	Peak612	953	1877	1445	1128	1402	1672
gRNA14352	Peak586	170	2052	173	835	280	1564
gRNA26276	Peak1097	132	1827	203	754	240	1702
gRNA26384	Peak1099	201	725	185	253	239	473
gRNA16157	Peak665	121	506	31	306	67	445
gRNA21308	Peak880	38	924	26	346	69	521
gRNA37449	Peak1617	38	279	77	148	21	386
gRNA23734	Peak968	86	1103	98	422	315	694
gRNA12358	Peak504	28	1281	5	637	5	1143
gRNA981	Peak31	50	888	41	455	167	728
gRNA38072	Peak1646	75	669	21	267	121	389
gRNA33841	Peak1458	32	468	14	222	78	358
gRNA26736	Peak1117	46	399	70	129	31	227
gRNA35974	Peak1563	125	2409	119	1250	264	2239
gRNA1411	Peak52	2	237	76	108	22	204
gRNA9756	Peak406	6	614	17	381	57	519
gRNA26545	Peak1108	218	356	33	310	119	300
gRNA6986	Peak287	203	431	217	218	162	535
gRNA12388	Peak505	15	357	26	135	52	235
gRNA39537	Peak1709	5	87	2	64	1	77
gRNA37984	Peak1639	272	839	295	311	652	474
gRNA19314	Peak795	74	765	159	413	72	440
gRNA10046	Peak418	55	212	71	137	87	198
gRNA17766	Peak737	42	128	4	52	29	67
gRNA25772	Peak1070	231	286	221	128	573	290
gRNA5775	Peak240	365	1101	524	525	184	934
gRNA28244	Peak1194	12	301	9	122	2	293
gRNA35635	Peak1548	79	304	153	112	22	307
gRNA5231	Peak221	183	1128	140	587	454	1019
gRNA23763	Peak968	0	41	0	0	13	25
gRNA6795	Peak283	242	1146	870	557	375	779
gRNA38968	Peak1682	286	1552	606	897	591	925
gRNA23363	Peak955	19	504	19	232	25	430
gRNA27603	Peak1161	15	297	17	80	13	159
gRNA14159	Peak576	2396	1210	3646	694	3353	900
gRNA16170	Peak665	100	944	89	356	281	620
gRNA28509	Peak1206	5	426	16	156	59	299
gRNA32909	Peak1418	1	17	0	0	0	1
gRNA3014	Peak125	237	987	94	615	127	960
gRNA19169	Peak787	0	0	0	0	0	0
gRNA16216	Peak667	0	160	0	39	20	92
gRNA20138	Peak836	2038	1905	2539	737	2747	1415
gRNA37003	Peak1603	2	86	5	21	3	28
gRNA20098	Peak834	8	662	3	238	37	343
gRNA26133	Peak1093	0	0	0	0	0	0
gRNA2302	Peak93	53	660	61	340	280	592
gRNA17016	Peak701	947	4386	1244	2037	1611	3187
gRNA26944	Peak1126	23	253	34	147	21	248
gRNA22419	Peak915	0	0	0	8	0	12
gRNA7468	Peak300	86	690	118	430	202	535
gRNA15334	Peak631	349	789	582	348	475	477
gRNA22782	Peak929	377	1282	367	871	726	1196
gRNA7678	Peak308	15	1889	10	922	15	1612
gRNA20986	Peak868	62	948	9	394	223	789
gRNA26626	Peak1111	27	195	10	84	24	112
gRNA13869	Peak566	55	63	14	41	11	55
gRNA4829	Peak205	74	494	82	279	216	499
gRNA35996	Peak1564	1006	3825	993	1885	1392	3103
gRNA31232	Peak1348	29	931	64	528	51	736
gRNA19139	Peak786	654	107	474	45	890	100
gRNA32327	Peak1391	65	504	42	292	88	366
gRNA29796	Peak1266	377	2019	357	987	318	1523
gRNA9739	Peak405	55	401	13	308	95	428
gRNA12406	Peak506	0	129	14	104	5	161
gRNA2906	Peak121	246	920	79	421	109	466
gRNA5339	Peak225	2	158	5	102	10	131
gRNA39351	Peak1698	99	707	88	460	90	608
gRNA24928	Peak1032	5659	2911	9105	1293	7819	2325
gRNA28452	Peak1203	112	1159	106	476	266	773
gRNA5567	Peak232	100	1649	169	627	246	1316
gRNA21926	Peak897	20	58	0	26	13	66
gRNA24328	Peak1001	1	2	0	0	0	7
gRNA11542	Peak472	0	1	0	0	0	1
gRNA13684	Peak557	0	219	3	115	0	138
gRNA33619	Peak1449	18	110	109	35	61	57
gRNA15177	Peak625	91	533	42	200	46	472
gRNA17300	Peak717	13	288	16	114	10	170
gRNA31014	Peak1340	83	623	19	208	154	343
gRNA15716	Peak644	96	615	124	453	77	736
gRNA32882	Peak1418	9	265	3	70	17	112
gRNA18277	Peak752	609	595	689	348	879	650
gRNA24441	Peak1007	16	997	3	512	61	625
gRNA2701	Peak111	24	551	36	152	60	224
gRNA35302	Peak1535	129	802	336	309	236	505
gRNA32332	Peak1392	266	1249	256	528	524	730
gRNA25274	Peak1045	1182	4036	1159	1870	1568	3529
gRNA24155	Peak989	295	2138	285	1029	565	1886
gRNA19720	Peak818	55	767	97	260	104	551
gRNA15308	Peak631	87	502	12	231	72	445
gRNA17543	Peak729	28	1476	40	500	77	992
gRNA12312	Peak502	207	898	137	511	281	864
gRNA6017	Peak253	2	403	0	195	5	363
gRNA18160	Peak748	0	33	0	2	5	38
gRNA27723	Peak1169	6	64	0	33	1	50
gRNA13753	Peak560	451	1102	251	454	516	801
gRNA25533	Peak1058	530	3222	957	1525	1466	2608
gRNA22712	Peak926	227	611	34	250	13	450
gRNA9691	Peak402	295	1670	97	670	399	1184
gRNA23343	Peak953	261	1210	142	671	250	970
gRNA11132	Peak457	96	431	144	354	144	492
gRNA31465	Peak1354	248	741	201	346	379	510
gRNA3826	Peak167	0	194	6	86	18	138
gRNA37004	Peak1603	73	50	112	23	55	83
gRNA33216	Peak1432	694	829	684	305	1673	665
gRNA10397	Peak431	11062	3095	13831	1592	17667	2719
gRNA28645	Peak1214	0	0	0	0	0	4
gRNA31576	Peak1358	1	179	1	63	0	64
gRNA993	Peak32	1618	2497	1743	1407	2787	2080
gRNA23874	Peak973	47	338	28	162	40	225
gRNA12579	Peak511	172	537	44	303	87	490
gRNA24517	Peak1010	55	332	150	203	150	359
gRNA25467	Peak1054	2107	4245	1384	2056	2317	3399
gRNA159	Peak6	335	1483	626	790	1013	1070
gRNA4350	Peak186	577	991	489	456	950	645
gRNA36119	Peak1568	604	830	987	477	465	544
gRNA31396	Peak1353	65	220	35	140	133	144
gRNA6567	Peak277	62	602	76	271	87	398
gRNA6570	Peak277	19	215	0	67	82	128
gRNA11884	Peak484	0	32	0	0	0	26
gRNA24166	Peak990	83	172	84	44	26	26
gRNA19068	Peak781	69	1489	60	655	289	1191
gRNA19470	Peak808	13	210	18	112	4	252
gRNA11613	Peak476	302	2884	588	1470	503	2357
gRNA3092	Peak130	2779	2772	2637	1470	3406	2507
gRNA3358	Peak142	125	788	113	277	213	575
gRNA4292	Peak184	71	391	7	171	30	309
gRNA33637	Peak1449	10	463	21	98	32	276
gRNA30466	Peak1310	33	979	38	478	263	652
gRNA35712	Peak1550	340	1699	824	916	680	1413
gRNA29667	Peak1261	0	40	0	33	12	19
gRNA31149	Peak1344	317	788	361	414	590	727
gRNA6968	Peak287	2	188	2	105	29	78
gRNA18372	Peak756	20	561	58	191	215	378
gRNA18441	Peak757	3	257	7	159	47	191
gRNA19895	Peak825	55	446	74	193	59	335
gRNA6382	Peak269	192	1131	165	476	140	790
gRNA26050	Peak1089	60	632	73	295	78	407
gRNA8437	Peak346	0	0	0	1	0	0
gRNA19329	Peak796	31	443	18	200	11	315
gRNA34173	Peak1475	4	246	5	135	0	123
gRNA26510	Peak1106	601	506	575	204	753	180
gRNA26311	Peak1097	57	758	57	414	123	521
gRNA12200	Peak496	27	16	8	0	39	11
gRNA1748	Peak68	1187	1815	2395	720	2699	1141
gRNA18299	Peak752	0	17	0	11	0	5
gRNA14774	Peak606	399	654	485	307	1242	599
gRNA36699	Peak1596	49	840	45	304	76	585
gRNA38320	Peak1660	10	131	6	83	26	91
gRNA4827	Peak205	0	0	0	0	0	0
gRNA18610	Peak761	103	543	118	300	178	403
gRNA33455	Peak1442	0	54	0	20	1	4
gRNA27831	Peak1174	42	556	13	248	12	360
gRNA37804	Peak1630	0	0	0	0	0	0
gRNA21190	Peak876	229	1647	165	681	359	1267
gRNA35800	Peak1554	615	417	419	225	784	497
gRNA33860	Peak1460	265	862	195	381	98	586
gRNA5701	Peak237	5	396	9	210	16	241
gRNA6700	Peak280	6	295	1	141	6	205
gRNA24419	Peak1007	692	2075	1921	1014	2251	1781
gRNA30909	Peak1337	386	1251	647	748	562	1064
gRNA25130	Peak1039	115	935	115	492	116	823
gRNA1868	Peak71	0	0	1	0	0	0
gRNA23682	Peak966	248	1942	125	1213	184	1693
gRNA39274	Peak1693	7	131	0	87	36	113
gRNA12166	Peak495	539	548	653	243	691	438
gRNA38171	Peak1651	903	2500	854	1019	1251	2196
gRNA24049	Peak983	385	762	377	307	721	576
gRNA31958	Peak1371	0	88	0	17	0	19
gRNA19000	Peak777	470	462	842	219	1533	385
gRNA8145	Peak332	1716	1924	2496	830	3807	1440
gRNA6993	Peak287	16	534	8	274	1	357
gRNA9333	Peak381	50	689	25	311	50	317
gRNA2305	Peak93	233	1265	305	665	191	1073
gRNA18238	Peak751	104	605	20	401	228	458
gRNA26106	Peak1091	0	143	0	45	0	97
gRNA25926	Peak1079	14	148	5	41	33	147
gRNA34011	Peak1466	3	118	13	64	30	77
gRNA27590	Peak1160	338	1211	329	554	356	977
gRNA11912	Peak485	16	352	28	201	53	326
gRNA19560	Peak813	23	179	33	137	27	235
gRNA8378	Peak344	47	439	3	128	24	231
gRNA12550	Peak511	19	299	4	128	6	208
gRNA16304	Peak670	27	102	21	11	28	111
gRNA21682	Peak888	8	127	64	75	69	83
gRNA19832	Peak823	85	72	33	23	11	40
gRNA14855	Peak609	85	365	40	150	105	211
gRNA34680	Peak1504	114	1607	75	763	162	1164
gRNA38260	Peak1656	227	549	113	202	372	482
gRNA5611	Peak234	0	32	0	6	0	31
gRNA25461	Peak1054	56	669	35	194	118	443
gRNA17684	Peak734	138	1041	77	529	89	987
gRNA20729	Peak860	6	223	11	87	22	137
gRNA30170	Peak1293	20	394	35	190	14	274
gRNA3667	Peak161	37	194	35	114	94	113
gRNA16041	Peak658	120	1410	32	751	196	1178
gRNA8975	Peak365	32	862	89	431	71	517
gRNA36286	Peak1579	38	897	60	252	55	720
gRNA19230	Peak791	5	334	13	197	28	210
gRNA14290	Peak583	4	62	6	78	11	103
gRNA31201	Peak1346	334	2149	354	851	391	1544
gRNA4934	Peak209	98	192	9	60	5	69
gRNA1478	Peak58	426	2098	230	1169	350	1688
gRNA29189	Peak1234	1127	2091	1186	873	2034	1717
gRNA2945	Peak122	0	127	0	4	0	33
gRNA25922	Peak1079	0	0	0	0	0	0
gRNA19852	Peak824	139	828	264	337	358	472
gRNA32278	Peak1390	130	1911	62	725	78	1184
gRNA39811	Peak1722	90	300	9	142	68	209
gRNA28224	Peak1191	8	890	61	439	87	653
gRNA7698	Peak309	198	818	123	431	196	521
gRNA35193	Peak1533	42	141	0	95	19	60
gRNA33807	Peak1457	53	942	15	732	50	681
gRNA11887	Peak485	567	3139	963	1151	832	2233
gRNA14936	Peak614	0	0	0	0	0	0
gRNA2415	Peak98	3	459	1	201	1	266
gRNA19245	Peak792	26	957	0	378	0	754
gRNA1750	Peak68	0	0	0	0	0	0
gRNA20911	Peak866	1938	1220	2505	761	2933	1495
gRNA18301	Peak752	0	0	0	0	0	9
gRNA33293	Peak1435	16	621	3	147	0	323
gRNA16447	Peak675	0	3	0	16	0	24
gRNA10079	Peak420	39	1131	52	449	93	799
gRNA26812	Peak1120	48	273	9	155	39	143
gRNA10351	Peak430	164	704	254	359	232	693
gRNA7966	Peak323	0	229	1	138	33	236
gRNA3540	Peak153	843	1214	517	549	949	697
gRNA38995	Peak1682	72	536	49	211	255	414
gRNA30879	Peak1335	963	735	923	436	1267	1044
gRNA12106	Peak493	66	556	73	369	177	392
gRNA12155	Peak495	23	105	26	87	11	111
gRNA7938	Peak321	0	105	0	36	0	56
gRNA29635	Peak1260	12	275	2	184	23	224
gRNA23230	Peak948	354	1262	900	587	972	1016
gRNA9570	Peak394	47	416	101	275	68	273
gRNA2698	Peak111	0	69	0	16	0	27
gRNA2900	Peak121	64	796	37	310	211	656
gRNA9633	Peak398	27	311	33	142	16	214
gRNA37340	Peak1615	130	1748	132	701	342	1232
gRNA37799	Peak1630	0	104	8	100	7	149
gRNA5011	Peak211	381	2700	593	1330	960	2058
gRNA17647	Peak733	371	1390	675	736	808	1365
gRNA34430	Peak1488	36	1155	30	482	159	840
gRNA14919	Peak613	82	329	39	306	216	402
gRNA5022	Peak211	40	247	21	77	52	198
gRNA2254	Peak91	0	0	0	0	0	0
gRNA20713	Peak859	46	612	34	246	103	439
gRNA24847	Peak1027	3	272	16	115	19	203
gRNA8247	Peak338	526	908	846	527	1596	854
gRNA18965	Peak777	33	114	50	111	89	159
gRNA16568	Peak680	298	1826	302	1021	89	1770
gRNA24338	Peak1001	16	821	21	247	32	574
gRNA2680	Peak110	136	324	66	200	170	295
gRNA26083	Peak1090	915	2439	1748	1093	2026	1763
gRNA27267	Peak1147	0	1	0	0	0	0
gRNA16578	Peak681	419	433	254	261	306	365
gRNA7930	Peak320	40	1243	22	515	54	994
gRNA33062	Peak1425	127	1928	40	993	232	1567
gRNA35619	Peak1548	5	395	12	193	11	327
gRNA13877	Peak566	7	583	38	343	54	574
gRNA34570	Peak1499	12	470	15	190	6	409
gRNA26489	Peak1105	30	406	47	188	136	308
gRNA3166	Peak134	0	0	0	0	0	0
gRNA39435	Peak1704	12	152	1	130	2	108
gRNA39497	Peak1707	127	890	137	425	303	778
gRNA3002	Peak123	205	1136	290	519	343	801
gRNA23395	Peak956	20	48	1	17	4	1
gRNA13204	Peak538	0	57	1	1	1	24
gRNA20238	Peak841	0	166	0	69	25	60
gRNA9879	Peak410	11	300	5	109	14	301
gRNA7602	Peak305	49	208	5	68	9	182
gRNA31132	Peak1344	0	28	0	16	0	25
gRNA3326	Peak140	0	28	0	7	0	35
gRNA8503	Peak349	239	1483	154	695	367	1239
gRNA2022	Peak80	0	0	0	4	0	0
gRNA32222	Peak1385	13	269	1	119	6	183
gRNA82	Peak3	117	1097	76	600	171	867
gRNA23295	Peak950	104	881	200	304	359	645
gRNA1443	Peak56	0	26	14	13	45	26
gRNA19407	Peak804	104	487	56	153	155	359
gRNA30707	Peak1324	4	253	10	174	11	246
gRNA24229	Peak994	0	35	0	25	11	26
gRNA28468	Peak1204	13	195	6	59	16	136
gRNA26125	Peak1093	0	0	0	0	0	1
gRNA2863	Peak119	0	29	0	23	0	10
gRNA6402	Peak270	0	74	0	27	15	40
gRNA28288	Peak1195	1	110	1	45	24	98
gRNA3383	Peak143	21	522	65	183	1	441
gRNA23003	Peak938	84	288	16	187	136	196
gRNA25290	Peak1045	157	900	182	560	364	836
gRNA2745	Peak113	42	413	68	107	166	241
gRNA38557	Peak1668	47	522	353	223	180	337
gRNA32312	Peak1391	0	0	0	0	0	3
gRNA38348	Peak1661	0	55	0	12	0	14
gRNA3655	Peak160	0	202	6	51	9	135
gRNA21918	Peak897	331	1963	682	718	765	1330
gRNA23649	Peak965	53	230	32	96	95	225
gRNA24125	Peak986	115	395	90	196	131	345
gRNA7580	Peak305	57	1092	45	559	109	771
gRNA27734	Peak1169	552	3088	321	1497	657	2283
gRNA37193	Peak1611	0	8	0	15	5	25
gRNA7695	Peak309	15	187	4	72	12	145
gRNA8711	Peak354	55	604	185	375	172	667
gRNA27025	Peak1132	2	166	72	64	16	104
gRNA8616	Peak352	106	408	172	265	215	321
gRNA20147	Peak836	29	1131	58	473	214	873
gRNA7761	Peak311	2307	2632	2326	1202	3437	2088
gRNA7646	Peak308	135	1452	68	549	427	1113
gRNA6042	Peak254	444	1472	804	702	574	959
gRNA30298	Peak1302	7	448	22	159	87	311
gRNA13269	Peak541	150	409	187	243	288	341
gRNA38560	Peak1668	340	1551	803	564	824	994
gRNA38340	Peak1661	75	859	45	413	49	470
gRNA26515	Peak1106	36	688	101	369	75	509
gRNA23956	Peak977	126	692	130	389	283	525
gRNA20717	Peak859	137	978	102	544	228	906
gRNA8120	Peak331	11	147	3	67	0	117
gRNA28032	Peak1184	0	52	7	17	0	22
gRNA27780	Peak1173	50	586	25	337	28	575
gRNA5667	Peak235	1	171	8	48	13	73
gRNA38625	Peak1671	2729	2075	2657	855	3258	1668
gRNA30094	Peak1287	2717	2348	2589	891	3693	1642
gRNA11175	Peak458	81	913	270	368	35	644
gRNA27200	Peak1143	0	100	0	12	0	41
gRNA26173	Peak1095	0	134	1	71	45	165
gRNA34440	Peak1490	85	1836	165	848	179	1489
gRNA23218	Peak948	29	1182	67	429	58	842
gRNA13167	Peak535	512	1298	351	603	624	1049
gRNA36721	Peak1597	0	100	0	38	0	50
gRNA5331	Peak225	60	139	63	37	114	93
gRNA21559	Peak884	0	0	0	0	0	0
gRNA34439	Peak1490	1024	1704	1140	772	2798	1439
gRNA12492	Peak509	17	261	3	98	45	138
gRNA1696	Peak66	49	1007	61	482	106	774
gRNA15238	Peak627	104	251	25	154	69	248
gRNA24249	Peak996	2	46	1	35	6	41
gRNA29826	Peak1268	476	2675	667	1230	687	1908
gRNA10628	Peak438	363	3263	511	1488	1282	2711
gRNA38777	Peak1676	28	868	20	398	14	609
gRNA3502	Peak150	12	75	0	5	2	70
gRNA35562	Peak1545	0	139	4	55	2	70
gRNA2	Peak1	66	543	94	287	202	587
gRNA11457	Peak468	0	0	0	0	0	0
gRNA19886	Peak825	13	100	23	20	41	22
gRNA31104	Peak1343	1	169	0	38	0	124
gRNA2795	Peak116	7	449	12	192	26	372
gRNA1604	Peak61	92	385	103	269	49	399
gRNA38602	Peak1670	77	1271	60	413	141	934
gRNA5322	Peak225	111	734	40	336	133	652
gRNA29155	Peak1233	47	705	16	280	21	590
gRNA15546	Peak638	105	979	106	364	351	770
gRNA25153	Peak1039	52	667	6	198	28	401
gRNA31951	Peak1370	114	413	53	138	95	339
gRNA36147	Peak1570	90	637	99	370	58	646
gRNA15586	Peak639	0	126	0	55	0	60
gRNA11146	Peak457	531	1020	149	579	499	682
gRNA5258	Peak221	142	1535	90	653	162	1175
gRNA28636	Peak1214	53	120	126	48	49	100
gRNA38957	Peak1682	6	120	2	61	4	103
gRNA4175	Peak181	0	0	0	0	0	0
gRNA26934	Peak1126	0	244	1	115	4	182
gRNA10499	Peak432	230	1481	440	783	619	1135
gRNA26579	Peak1109	3	141	17	60	10	62
gRNA31968	Peak1371	0	0	0	0	0	0
gRNA7667	Peak308	24	107	30	36	21	113
gRNA29070	Peak1230	1	87	1	74	8	108
gRNA39809	Peak1722	33	194	6	120	42	128
gRNA32095	Peak1374	1101	1748	1485	881	1580	1382
gRNA9379	Peak384	0	0	0	0	0	0
gRNA28301	Peak1196	999	3123	864	1411	1049	2468
gRNA10524	Peak433	86	427	107	185	78	389
gRNA32230	Peak1385	61	2400	65	946	130	2110
gRNA35210	Peak1533	0	174	2	44	3	167
gRNA36503	Peak1588	0	330	1	88	0	128
gRNA31928	Peak1370	94	1765	120	1033	367	1365
gRNA23880	Peak973	57	932	26	607	62	719
gRNA8977	Peak365	0	470	6	153	1	228
gRNA30211	Peak1297	170	1636	109	765	251	1607
gRNA37951	Peak1638	1	151	1	10	0	86
gRNA26253	Peak1097	1505	965	670	494	1799	988
gRNA36734	Peak1597	0	23	0	1	0	5
gRNA5831	Peak243	2	389	11	174	50	239
gRNA5621	Peak234	1026	1257	1011	731	697	1048
gRNA35226	Peak1533	95	2324	186	967	218	1479
gRNA22340	Peak913	8	593	43	296	51	543
gRNA27247	Peak1146	325	450	927	235	104	342
gRNA9326	Peak381	41	400	28	172	38	252
gRNA2244	Peak91	34	180	0	49	0	145
gRNA6465	Peak272	32	101	1	56	24	65
gRNA26582	Peak1109	0	2	0	0	0	0
gRNA25259	Peak1044	264	575	487	295	466	514
gRNA5541	Peak231	149	566	359	216	95	404
gRNA31982	Peak1371	13	85	24	58	8	78
gRNA511	Peak15	593	3369	717	1602	1503	2644
gRNA18503	Peak758	20	637	13	240	38	446
gRNA29051	Peak1229	62	142	20	28	21	73
gRNA33359	Peak1438	423	1327	385	715	1059	1213
gRNA24363	Peak1004	74	313	263	244	126	285
gRNA23373	Peak955	287	1542	277	712	285	1109
gRNA2999	Peak123	440	998	301	530	782	970
gRNA30140	Peak1291	0	789	3	502	36	724
gRNA21548	Peak884	333	845	224	408	264	549
gRNA3697	Peak162	128	763	129	393	230	653
gRNA33798	Peak1457	75	672	22	257	57	485
gRNA37027	Peak1604	287	761	118	325	281	609
gRNA28998	Peak1228	1	449	2	189	20	240
gRNA27065	Peak1136	160	989	181	323	165	771
gRNA13060	Peak529	72	681	32	233	65	530
gRNA997	Peak32	1	329	20	246	20	228
gRNA15182	Peak625	64	711	56	379	201	506
gRNA3896	Peak169	26	133	96	85	83	89
gRNA33210	Peak1432	820	859	1035	296	1327	747
gRNA3246	Peak137	50	507	17	211	38	365
gRNA3240	Peak137	46	268	69	79	39	202
gRNA4142	Peak180	1	204	4	102	0	199
gRNA36524	Peak1590	319	1715	776	774	817	1190
gRNA22870	Peak933	113	1091	49	384	286	902
gRNA14755	Peak605	42	1054	38	339	86	663
gRNA30385	Peak1306	3	361	12	208	13	252
gRNA34245	Peak1478	29	63	17	43	79	98
gRNA6984	Peak287	108	472	98	246	162	405
gRNA3494	Peak149	113	607	201	316	110	379
gRNA38470	Peak1665	289	815	272	350	50	652
gRNA37420	Peak1617	951	1954	811	1183	1772	1824
gRNA37543	Peak1622	13	542	0	169	29	372
gRNA37524	Peak1622	1	0	0	0	0	0
gRNA38721	Peak1674	14	419	21	229	76	262
gRNA33513	Peak1444	105	694	103	247	233	411
gRNA2710	Peak111	67	695	258	297	239	490
gRNA885	Peak27	428	1256	250	699	900	997
gRNA22776	Peak928	112	1900	138	842	217	1612
gRNA34409	Peak1488	1166	1201	1375	437	1275	843
gRNA14283	Peak583	7	561	7	198	34	328
gRNA34797	Peak1516	19	918	19	397	71	674
gRNA36284	Peak1579	2	351	33	106	16	251
gRNA70	Peak3	3	290	18	156	75	178
gRNA8966	Peak365	1	505	7	218	1	366
gRNA2973	Peak123	7	275	15	181	93	244
gRNA21035	Peak871	2	164	37	72	0	155
gRNA36298	Peak1581	1	65	7	36	22	103
gRNA15619	Peak641	14	57	4	2	0	39
gRNA22454	Peak917	75	498	20	208	27	326
gRNA6956	Peak287	15	240	7	96	33	153
gRNA31496	Peak1355	0	38	0	21	0	33
gRNA17553	Peak729	24	216	40	189	87	259
gRNA37558	Peak1623	74	1113	120	617	130	948
gRNA29400	Peak1244	8	365	48	187	48	251
gRNA38378	Peak1663	52	859	37	410	99	697
gRNA7628	Peak307	172	1398	121	951	189	1480
gRNA9400	Peak384	1209	2376	1204	1120	2146	1871
gRNA33439	Peak1441	74	299	238	111	313	288
gRNA3390	Peak143	13	301	17	141	65	161
gRNA365	Peak11	165	1218	134	658	438	901
gRNA38848	Peak1679	0	104	5	73	42	40
gRNA8973	Peak365	408	2120	564	1123	873	1938
gRNA513	Peak15	29	212	73	130	113	304
gRNA24323	Peak1001	16	262	14	81	25	99
gRNA36309	Peak1581	274	506	259	265	484	428
gRNA26499	Peak1106	0	4	0	2	0	17
gRNA9042	Peak369	312	1178	345	409	539	845
gRNA32252	Peak1387	2	87	0	5	0	36
gRNA8702	Peak354	0	187	0	109	0	209
gRNA20268	Peak841	131	612	115	345	337	398
gRNA9947	Peak413	2	222	4	92	0	152
gRNA21769	Peak894	127	539	182	304	284	375
gRNA2644	Peak108	10	510	22	183	57	354
gRNA26180	Peak1096	1	267	0	96	93	176
gRNA16236	Peak668	53	154	182	40	76	93
gRNA17918	Peak742	183	497	58	323	465	676
gRNA26458	Peak1104	40	439	52	189	89	310
gRNA17666	Peak734	28	269	17	108	60	267
gRNA13039	Peak529	1	63	3	47	24	80
gRNA7057	Peak288	104	479	38	227	119	547
gRNA7385	Peak295	76	1695	111	867	69	1280
gRNA20799	Peak863	0	1	0	0	0	1
gRNA18080	Peak745	5	146	4	90	7	182
gRNA7571	Peak304	3542	4457	8695	1881	9714	3978
gRNA20913	Peak866	62	630	44	226	99	396
gRNA14484	Peak589	0	0	0	12	0	0
gRNA15540	Peak637	324	1943	519	918	704	1342
gRNA11366	Peak464	0	4	0	21	0	26
gRNA19517	Peak811	0	1	0	0	0	0
gRNA29285	Peak1239	128	2092	136	1007	176	1719
gRNA11168	Peak458	135	1510	94	791	118	1064
gRNA4819	Peak205	39	146	35	75	96	129
gRNA28220	Peak1191	91	216	118	114	232	220
gRNA26879	Peak1124	0	0	0	0	0	3
gRNA6821	Peak283	910	1414	1299	579	1558	1011
gRNA5690	Peak237	42	822	1	409	63	527
gRNA18070	Peak745	7	79	0	29	15	66
gRNA13765	Peak560	0	191	0	37	0	144
gRNA1237	Peak44	38	857	74	402	183	714
gRNA26513	Peak1106	35	996	102	514	159	844
gRNA37685	Peak1626	207	1064	47	396	649	952
gRNA16852	Peak693	38	1025	145	470	123	854
gRNA36851	Peak1598	10	107	5	65	28	174
gRNA37480	Peak1619	15	386	3	233	1	383
gRNA11477	Peak469	1138	2008	1220	1120	2033	1926
gRNA200	Peak8	251	1048	116	404	254	837
gRNA1705	Peak66	24	260	17	85	8	111
gRNA6107	Peak258	1	95	0	23	22	143
gRNA26636	Peak1112	0	186	3	93	1	123
gRNA31590	Peak1359	99	433	17	207	471	411
gRNA16475	Peak676	5	208	28	189	12	226
gRNA28270	Peak1194	50	215	16	62	28	161
gRNA31668	Peak1362	0	72	0	19	0	20
gRNA34899	Peak1521	33	1022	35	682	32	932
gRNA26506	Peak1106	30	411	50	130	278	288
gRNA24503	Peak1010	3	158	0	67	5	85
gRNA31152	Peak1344	83	542	37	180	160	397
gRNA25311	Peak1046	10	226	3	98	18	215
gRNA95	Peak3	433	1660	502	924	1368	1585
gRNA2876	Peak120	271	2305	382	1174	263	1713
gRNA39026	Peak1683	14	365	24	144	133	216
gRNA37020	Peak1604	135	606	220	218	311	351
gRNA2481	Peak101	540	2889	874	1291	1043	2162
gRNA32500	Peak1401	248	861	71	325	136	529
gRNA15727	Peak645	0	26	16	3	6	22
gRNA20974	Peak867	134	578	88	269	52	415
gRNA2684	Peak110	68	295	24	83	181	159
gRNA31181	Peak1345	0	110	19	13	34	22
gRNA37160	Peak1610	727	1331	452	592	1033	1017
gRNA24344	Peak1002	79	412	47	256	49	315
gRNA15121	Peak624	4	252	1	231	0	301
gRNA9742	Peak405	197	418	82	271	119	486
gRNA34642	Peak1503	1	238	0	173	17	198
gRNA14124	Peak575	5	141	1	98	14	85
gRNA10017	Peak418	141	886	433	449	230	807
gRNA19579	Peak814	7	32	0	3	16	8
gRNA19606	Peak815	10	1101	27	571	12	908
gRNA6634	Peak279	0	1	0	0	0	2
gRNA36603	Peak1593	15	238	4	69	0	98
gRNA13129	Peak533	165	1137	284	539	383	1002
gRNA23266	Peak950	81	186	55	140	115	287
gRNA36902	Peak1598	15	59	6	3	0	15
gRNA6816	Peak283	11	184	17	85	42	141
gRNA13862	Peak565	1	225	1	118	8	186
gRNA10305	Peak429	38	172	15	31	110	134
gRNA23293	Peak950	28	919	31	302	112	661
gRNA7180	Peak289	163	892	161	384	108	601
gRNA14456	Peak589	35	187	18	59	64	178
gRNA14466	Peak589	4	146	6	120	1	85
gRNA36074	Peak1566	0	188	5	127	16	148
gRNA4726	Peak202	17	567	15	241	15	378
gRNA1471	Peak58	37	282	66	193	70	254
gRNA24543	Peak1013	10	109	19	87	0	124
gRNA11370	Peak464	88	1149	77	484	97	799
gRNA30894	Peak1336	39	580	31	335	9	422
gRNA15097	Peak622	0	109	1	36	1	84
gRNA34192	Peak1476	44	440	99	207	63	356
gRNA32702	Peak1411	0	39	0	21	0	30
gRNA20857	Peak864	5	167	0	89	7	96
gRNA18489	Peak758	106	1113	103	445	192	907
gRNA35428	Peak1539	10	75	6	45	10	57
gRNA23779	Peak969	3	459	3	183	62	498
gRNA12513	Peak510	141	630	284	284	557	446
gRNA4088	Peak178	296	2430	586	1259	662	1835
gRNA38474	Peak1665	0	67	3	34	0	34
gRNA8706	Peak354	0	0	0	0	0	13
gRNA12940	Peak524	0	26	0	0	0	1
gRNA2718	Peak112	11	101	12	85	12	139
gRNA13836	Peak564	5	565	0	310	15	346
gRNA22753	Peak927	39	174	46	63	104	213
gRNA13055	Peak529	192	564	209	153	211	367
gRNA22785	Peak929	14	489	3	198	30	371
gRNA10398	Peak431	0	94	0	91	0	90
gRNA24863	Peak1027	230	1006	419	466	263	719
gRNA34874	Peak1519	7	289	3	190	0	249
gRNA9405	Peak384	3933	1828	4864	828	7400	1249
gRNA39121	Peak1687	0	323	5	85	0	253
gRNA2603	Peak106	15	561	13	232	23	447
gRNA14767	Peak606	23	231	63	53	12	139
gRNA38315	Peak1660	269	1191	165	527	270	735
gRNA20352	Peak845	58	955	49	424	158	559
gRNA29624	Peak1258	1053	3781	871	1791	1292	3006
gRNA27607	Peak1161	23	430	13	236	51	421
gRNA1198	Peak43	18	148	157	100	32	76
gRNA31350	Peak1352	66	415	145	195	176	337
gRNA25355	Peak1049	92	355	35	209	31	351
gRNA36787	Peak1597	65	323	35	209	97	391
gRNA20452	Peak847	1754	1926	2101	870	2150	1319
gRNA819	Peak24	101	670	161	373	386	597
gRNA19586	Peak814	0	69	2	22	0	30
gRNA28052	Peak1184	9	902	13	409	13	517
gRNA34644	Peak1503	0	51	0	19	0	15
gRNA1552	Peak59	246	712	181	347	221	565
gRNA36765	Peak1597	510	2024	523	828	614	1425
gRNA35584	Peak1546	17	550	11	235	45	359
gRNA35465	Peak1540	0	26	0	30	0	5
gRNA35456	Peak1540	19	275	3	208	31	192
gRNA29282	Peak1239	0	0	0	1	0	4
gRNA33639	Peak1449	1700	3216	2075	1441	2174	2481
gRNA18293	Peak752	429	368	834	119	652	403
gRNA2151	Peak86	25	340	21	118	10	260
gRNA12092	Peak492	133	855	213	480	313	673
gRNA35570	Peak1546	2215	1217	2321	625	3492	1032
gRNA7044	Peak288	18	452	31	240	7	345
gRNA4364	Peak186	168	1072	244	554	317	803
gRNA25491	Peak1056	5	251	0	86	13	217
gRNA22339	Peak913	252	1527	512	623	511	1294
gRNA27455	Peak1154	378	1938	898	747	331	1539
gRNA9687	Peak402	0	81	0	30	0	74
gRNA28428	Peak1202	0	248	36	114	24	174
gRNA26416	Peak1101	102	789	71	345	150	542
gRNA25191	Peak1042	63	348	112	158	98	328
gRNA16537	Peak679	2	170	17	59	17	93
gRNA19567	Peak813	11	275	12	106	49	214
gRNA19879	Peak825	95	790	127	362	652	449
gRNA39463	Peak1705	100	637	57	275	158	390
gRNA28379	Peak1199	0	7	0	11	0	5
gRNA34304	Peak1482	42	167	74	43	98	80
gRNA21587	Peak885	43	1752	64	947	46	1566
gRNA35531	Peak1544	471	797	808	510	365	626
gRNA4133	Peak180	124	386	17	136	154	226
gRNA27907	Peak1177	17	405	14	94	0	236
gRNA2114	Peak85	55	629	68	237	201	512
gRNA4773	Peak203	14	146	0	91	2	114
gRNA8526	Peak350	174	1236	411	716	313	998
gRNA8941	Peak364	45	184	81	56	189	131
gRNA23144	Peak945	678	504	318	161	609	364
gRNA25008	Peak1034	146	884	377	269	350	492
gRNA32839	Peak1417	4	30	2	38	1	22
gRNA19143	Peak786	20	77	2	26	7	58
gRNA18953	Peak776	91	728	141	318	150	582
gRNA11204	Peak459	155	1486	181	641	476	943
gRNA20962	Peak867	43	173	60	119	292	133
gRNA30938	Peak1337	202	1437	287	596	453	1219
gRNA5456	Peak229	7	110	0	74	0	139
gRNA16331	Peak672	17	76	11	44	8	50
gRNA32645	Peak1408	6	332	4	137	9	172
gRNA27088	Peak1138	835	834	1332	499	1215	717
gRNA12365	Peak504	0	110	0	19	0	22
gRNA5805	Peak242	1139	3587	1099	1650	1385	3431
gRNA19500	Peak811	29	1102	60	475	168	701
gRNA19861	Peak825	153	741	43	464	177	663
gRNA31045	Peak1341	1	278	0	109	9	223
gRNA34390	Peak1487	83	558	164	292	309	494
gRNA22872	Peak933	145	675	56	469	173	377
gRNA18374	Peak756	18	344	15	79	23	95
gRNA17583	Peak731	18	13	0	23	13	23
gRNA12820	Peak521	29	1201	25	375	27	810
gRNA28689	Peak1216	58	125	25	76	17	192
gRNA4950	Peak209	107	546	219	344	76	495
gRNA1266	Peak44	28	345	25	104	83	251
gRNA24221	Peak993	206	1254	237	472	695	712
gRNA39577	Peak1712	10	130	1	46	0	69
gRNA30244	Peak1298	0	110	0	34	0	47
gRNA9674	Peak401	1	194	1	62	0	125
gRNA29812	Peak1267	427	2303	188	1076	488	1488
gRNA1672	Peak64	97	351	214	162	305	295
gRNA17082	Peak704	63	753	110	371	139	618
gRNA7591	Peak305	110	928	78	547	33	842
gRNA24026	Peak981	97	688	153	297	284	583
gRNA31205	Peak1346	352	420	428	282	804	431
gRNA3088	Peak129	4	129	5	72	7	62
gRNA1499	Peak59	27	787	43	329	157	539
gRNA9361	Peak383	53	488	80	252	248	432
gRNA21323	Peak881	4792	2506	2602	1103	5610	1988
gRNA35005	Peak1524	0	499	0	309	12	530
gRNA17036	Peak703	52	624	34	301	5	486
gRNA30883	Peak1335	5	148	1	43	4	59
gRNA1405	Peak51	323	704	48	497	142	764
gRNA2519	Peak103	19	315	0	182	6	193
gRNA33290	Peak1435	0	36	0	19	0	52
gRNA3925	Peak171	3	758	24	376	95	702
gRNA32595	Peak1407	1	269	0	79	1	112
gRNA17922	Peak742	0	13	1	26	19	25
gRNA16377	Peak673	4	118	2	95	0	64
gRNA5096	Peak213	381	1385	467	473	591	1025
gRNA19735	Peak818	4	312	1	125	0	202
gRNA37822	Peak1631	0	138	0	35	0	113
gRNA26943	Peak1126	25	256	22	152	14	266
gRNA20096	Peak834	418	2969	420	1489	440	2048
gRNA34940	Peak1522	112	1306	144	489	114	941
gRNA22316	Peak913	178	2033	243	1007	567	1736
gRNA4923	Peak209	3	126	2	116	2	115
gRNA24215	Peak992	122	135	96	52	124	94
gRNA27405	Peak1153	9	398	15	161	15	261
gRNA37330	Peak1615	0	28	1	13	0	34
gRNA26110	Peak1091	18	422	43	225	397	324
gRNA31061	Peak1342	116	762	40	393	358	508
gRNA35525	Peak1543	10	2	0	3	14	4
gRNA28994	Peak1228	594	1523	344	578	640	1432
gRNA6891	Peak284	3032	564	4116	343	6762	364
gRNA25301	Peak1046	0	31	11	14	5	23
gRNA20174	Peak838	1	104	7	33	4	48
gRNA28684	Peak1216	0	193	8	114	0	204
gRNA4924	Peak209	40	221	35	114	33	155
gRNA35156	Peak1531	0	4	0	0	0	15
gRNA7958	Peak323	147	1782	94	689	224	1244
gRNA33546	Peak1446	59	758	32	371	109	707
gRNA12276	Peak500	467	880	713	524	568	673
gRNA2013	Peak80	6	43	0	28	7	84
gRNA28982	Peak1228	298	474	305	195	700	336
gRNA21008	Peak869	0	98	0	96	1	63
gRNA999	Peak32	0	0	0	0	0	0
gRNA10986	Peak450	1	154	22	127	4	155
gRNA3016	Peak125	54	804	126	437	83	590
gRNA29398	Peak1244	2	89	5	39	19	50
gRNA24178	Peak990	0	42	0	26	0	10
gRNA22902	Peak935	0	2	0	0	0	0
gRNA18452	Peak757	87	760	144	240	174	608
gRNA28059	Peak1185	152	1176	103	447	422	781
gRNA29531	Peak1250	4	147	13	134	22	66
gRNA16566	Peak680	13	452	8	246	30	327
gRNA21914	Peak896	26	520	24	190	61	395
gRNA24112	Peak986	30	1137	18	513	28	803
gRNA17316	Peak719	65	636	32	382	115	383
gRNA8471	Peak348	257	1014	184	582	281	730
gRNA7428	Peak296	11	197	7	66	18	120
gRNA33888	Peak1461	69	613	78	198	102	361
gRNA33918	Peak1462	1	2	0	1	0	0
gRNA10388	Peak431	2095	1048	3768	301	3854	663
gRNA18734	Peak765	9	233	2	229	11	240
gRNA36077	Peak1566	33	999	33	390	194	663
gRNA25849	Peak1074	113	1013	123	456	211	663
gRNA29919	Peak1275	275	489	258	347	537	603
gRNA32489	Peak1400	83	587	45	184	57	345
gRNA14055	Peak571	26	643	61	200	84	485
gRNA7681	Peak308	0	5	0	7	0	0
gRNA39842	Peak1724	0	140	0	25	8	19
gRNA30332	Peak1303	1081	479	1138	181	1661	351
gRNA19612	Peak815	24	246	28	128	15	182
gRNA14747	Peak605	613	1660	1439	979	996	1596
gRNA26113	Peak1091	0	361	4	166	9	275
gRNA16788	Peak689	27	439	3	153	68	183
gRNA31980	Peak1371	98	307	120	135	178	363
gRNA32469	Peak1399	133	564	174	216	199	445
gRNA4281	Peak184	649	2465	523	1100	1083	2012
gRNA2532	Peak103	17	252	7	98	1	140
gRNA5464	Peak229	49	576	100	359	44	587
gRNA25177	Peak1040	455	1216	796	851	1301	1238
gRNA8865	Peak360	0	52	0	17	0	33
gRNA25464	Peak1054	115	566	76	295	81	368
gRNA7055	Peak288	34	451	53	198	87	295
gRNA35187	Peak1533	13	165	20	87	10	235
gRNA16850	Peak693	1433	2179	1293	948	2066	1344
gRNA6105	Peak258	0	0	0	0	0	0
gRNA3348	Peak141	88	1335	64	622	124	1127
gRNA17147	Peak709	759	1035	1177	512	1114	932
gRNA7148	Peak289	0	775	11	307	4	544
gRNA30128	Peak1290	67	352	65	141	51	291
gRNA6696	Peak280	288	1002	533	616	515	1103
gRNA10742	Peak442	25	841	7	371	19	567
gRNA7782	Peak312	669	2575	1089	1065	779	1742
gRNA10232	Peak426	63	143	46	72	166	143
gRNA33686	Peak1453	364	3905	211	1555	500	3197
gRNA34284	Peak1481	0	14	5	9	0	15
gRNA9844	Peak409	23	805	55	397	33	720
gRNA3063	Peak128	1	70	2	43	0	129
gRNA32323	Peak1391	8	160	10	85	13	93
gRNA16535	Peak679	0	0	0	0	0	0
gRNA16517	Peak679	225	860	476	267	434	550
gRNA8161	Peak332	70	518	64	291	82	461
gRNA9551	Peak393	103	361	148	101	404	191
gRNA19558	Peak813	151	731	148	267	231	412
gRNA18746	Peak766	265	1149	455	538	281	750
gRNA24866	Peak1027	809	1606	546	713	1441	1405
gRNA24958	Peak1034	0	259	6	95	11	161
gRNA15323	Peak631	87	734	76	324	80	647
gRNA22314	Peak913	421	1008	795	498	698	722
gRNA16521	Peak679	93	1201	88	650	125	955
gRNA10600	Peak436	331	1819	248	894	855	1479
gRNA39542	Peak1710	1569	1435	1747	567	1752	836
gRNA23900	Peak974	208	631	147	376	233	492
gRNA21147	Peak875	33	107	9	6	29	54
gRNA18061	Peak745	21	225	19	75	12	262
gRNA27229	Peak1144	0	16	0	0	0	8
gRNA36075	Peak1566	17	624	8	304	17	480
gRNA30881	Peak1335	2	21	0	4	0	6
gRNA30329	Peak1303	0	83	0	22	9	17
gRNA32893	Peak1418	0	0	6	0	1	12
gRNA32895	Peak1418	29	214	26	62	47	100
gRNA32897	Peak1418	978	922	1202	381	1430	663
gRNA38465	Peak1665	37	227	5	141	52	218
gRNA30843	Peak1333	0	7	0	4	0	11
gRNA24973	Peak1034	6	182	9	93	10	166
gRNA31145	Peak1344	0	120	20	49	26	172
gRNA20392	Peak847	40	1156	29	760	251	983
gRNA32904	Peak1418	0	0	0	0	0	0
gRNA32961	Peak1421	30	704	81	440	119	865
gRNA2468	Peak101	112	109	92	61	223	106
gRNA30250	Peak1299	0	0	0	0	0	0
gRNA12118	Peak493	19	117	7	65	12	135
gRNA17378	Peak723	0	0	0	0	0	0
gRNA5180	Peak218	311	349	352	217	618	287
gRNA22955	Peak936	4	199	6	56	41	133
gRNA36142	Peak1569	35	863	32	342	76	524
gRNA11516	Peak470	0	44	0	46	0	28
gRNA65	Peak3	0	0	0	1	0	0
gRNA38914	Peak1681	32	580	34	345	75	633
gRNA3156	Peak134	807	1629	569	867	1292	1280
gRNA19703	Peak818	598	3424	694	1753	714	2710
gRNA8551	Peak350	50	183	18	68	80	101
gRNA1056	Peak35	259	1063	177	374	429	820
gRNA30755	Peak1327	0	0	0	0	0	0
gRNA36669	Peak1594	0	63	1	3	7	25
gRNA24975	Peak1034	149	1339	156	611	106	969
gRNA35626	Peak1548	3	30	0	17	0	41
gRNA12830	Peak521	0	0	0	0	0	0
gRNA16577	Peak681	0	0	0	0	0	0
gRNA6104	Peak258	0	230	1	46	1	102
gRNA21002	Peak868	13	202	5	27	15	97
gRNA27128	Peak1140	0	0	0	0	0	0
gRNA5094	Peak213	3	11	4	19	7	11
gRNA31002	Peak1340	148	1192	119	549	349	1066
gRNA13622	Peak555	189	1501	369	685	228	1115
gRNA24972	Peak1034	1	191	6	130	0	196
gRNA4306	Peak185	114	1063	179	512	439	1004
gRNA5814	Peak242	0	0	0	0	0	5
gRNA31611	Peak1360	0	0	0	0	0	1
gRNA38122	Peak1648	629	1082	443	455	937	928
gRNA29219	Peak1235	49	340	62	206	67	205
gRNA8508	Peak349	46	369	33	305	77	291
gRNA24780	Peak1023	22	477	105	225	80	367
gRNA32985	Peak1423	27	596	3	331	46	345
gRNA1535	Peak59	44	1786	83	725	87	1226
gRNA27738	Peak1169	12	224	3	80	0	51
gRNA23335	Peak952	29	881	38	325	74	501
gRNA14504	Peak591	29	261	77	137	63	266
gRNA31119	Peak1343	52	746	265	502	346	442
gRNA15734	Peak645	4	240	5	194	1	206
gRNA31940	Peak1370	57	545	35	223	202	387
gRNA32793	Peak1416	13	306	10	167	76	286
gRNA890	Peak27	0	0	0	0	0	0
gRNA18269	Peak752	1	235	0	132	7	152
gRNA1224	Peak43	74	1051	83	532	152	702
gRNA2178	Peak88	0	0	0	0	0	0
gRNA1105	Peak37	0	38	4	28	0	22
gRNA4085	Peak178	0	75	0	39	0	64
gRNA21122	Peak875	193	682	35	320	76	470
gRNA1754	Peak68	0	0	0	0	0	0
gRNA20092	Peak834	0	65	0	16	23	19
gRNA31953	Peak1370	3	21	0	8	0	43
gRNA4080	Peak178	103	805	75	401	144	725
gRNA39216	Peak1691	205	928	92	455	318	588
gRNA7785	Peak312	0	0	0	0	0	0
gRNA35049	Peak1527	42	763	139	360	60	727
gRNA32811	Peak1417	64	519	56	202	151	457
gRNA5699	Peak237	1302	849	1301	381	2365	875
gRNA13243	Peak539	48	824	57	325	45	653
gRNA2027	Peak80	108	1055	183	477	147	933
gRNA25854	Peak1074	25	939	21	451	61	643
gRNA33820	Peak1458	29	198	18	174	4	256
gRNA29749	Peak1265	595	1596	1002	858	756	1416
gRNA35768	Peak1552	0	466	3	198	26	314
gRNA32213	Peak1385	88	285	68	197	57	403
gRNA20737	Peak860	0	1	0	0	0	3
gRNA24702	Peak1020	48	489	13	130	112	287
gRNA33059	Peak1425	38	0	8	50	0	63
gRNA6311	Peak266	0	103	0	25	1	106
gRNA4300	Peak185	601	831	895	511	899	973
gRNA7043	Peak288	330	896	567	518	648	829
gRNA7377	Peak295	0	151	2	32	2	61
gRNA28567	Peak1209	61	236	219	138	72	209
gRNA12968	Peak525	64	812	34	295	71	599
gRNA18202	Peak750	155	1123	248	404	307	819
gRNA37931	Peak1638	17	335	5	142	52	290
gRNA32390	Peak1396	0	2	0	14	1	23
gRNA10983	Peak450	0	0	0	0	0	0
gRNA37864	Peak1633	603	2595	614	1011	671	1883
gRNA34731	Peak1509	1	657	16	137	66	350
gRNA35309	Peak1535	219	848	157	375	300	624
gRNA2966	Peak123	432	1251	494	594	435	769
gRNA11211	Peak459	0	163	0	39	0	49
gRNA27262	Peak1147	129	1046	134	503	76	801
gRNA19044	Peak778	352	1719	258	726	682	1242
gRNA3715	Peak163	465	975	783	486	527	813
gRNA5215	Peak220	2	125	0	37	0	50
gRNA12965	Peak525	97	591	65	323	98	553
gRNA25813	Peak1072	11	190	9	79	68	69
gRNA3745	Peak164	39	698	33	267	168	416
gRNA21630	Peak886	66	206	31	78	171	114
gRNA14584	Peak596	636	1175	1378	563	2047	888
gRNA13984	Peak569	2	103	0	79	15	85
gRNA14605	Peak597	16	411	16	155	27	325
gRNA38725	Peak1675	1	28	1	35	1	24
gRNA14173	Peak576	114	489	164	141	365	350
gRNA9653	Peak399	137	948	117	428	238	708
gRNA4830	Peak205	1304	1933	1088	920	2148	1455
gRNA15390	Peak632	911	902	744	427	789	777
gRNA17019	Peak702	1	15	0	8	0	9
gRNA8861	Peak359	1925	1506	2060	924	3917	1401
gRNA4160	Peak180	26	26	24	7	17	17
gRNA35999	Peak1564	36	751	68	476	57	657
gRNA37808	Peak1630	49	381	11	198	85	438
gRNA27019	Peak1132	3	204	5	135	99	111
gRNA24551	Peak1013	6	34	1	24	32	25
gRNA2810	Peak117	21	206	15	32	0	56
gRNA19039	Peak778	12	215	20	55	10	86
gRNA5315	Peak225	48	552	2	299	6	335
gRNA30890	Peak1336	434	2504	907	1012	1006	1570
gRNA34074	Peak1469	0	80	1	31	0	68
gRNA38342	Peak1661	19	96	27	49	22	87
gRNA4105	Peak179	0	153	0	72	15	156
gRNA5344	Peak225	17	381	133	200	331	290
gRNA26501	Peak1106	178	752	115	392	385	649
gRNA36906	Peak1598	6	1518	35	706	33	1000
gRNA33080	Peak1425	5	274	1	224	4	186
gRNA7728	Peak310	0	0	0	1	0	0
gRNA26361	Peak1097	233	877	268	403	367	747
gRNA9317	Peak381	4	199	0	56	0	122
gRNA33612	Peak1449	97	430	190	109	70	266
gRNA28274	Peak1195	55	787	85	313	76	675
gRNA32255	Peak1387	341	220	35	97	34	165
gRNA29059	Peak1230	63	642	131	334	424	437
gRNA38099	Peak1647	239	2295	1006	1159	410	1802
gRNA44	Peak2	25	1891	47	968	42	1405
gRNA35046	Peak1527	39	306	16	74	36	160
gRNA18893	Peak775	10	400	15	148	27	177
gRNA10643	Peak438	42	820	29	342	40	569
gRNA3032	Peak125	23	110	7	53	11	59
gRNA1872	Peak71	13	772	10	431	34	663
gRNA10935	Peak448	44	1213	22	574	100	916
gRNA14977	Peak616	161	306	87	131	15	141
gRNA39459	Peak1704	78	717	43	348	210	525
gRNA28550	Peak1208	0	213	61	28	77	124
gRNA29492	Peak1249	228	941	342	387	311	707
gRNA14130	Peak575	159	1007	180	594	265	848
gRNA25270	Peak1045	61	660	116	136	142	235
gRNA33640	Peak1449	0	0	0	24	6	0
gRNA20930	Peak866	571	1639	1047	801	829	1364
gRNA19631	Peak816	353	1145	731	572	292	918
gRNA23977	Peak978	0	20	0	10	0	25
gRNA19411	Peak804	26	353	32	189	9	183
gRNA24421	Peak1007	7	97	6	91	0	126
gRNA8911	Peak363	95	634	58	312	367	519
gRNA5835	Peak243	63	602	260	425	759	639
gRNA11780	Peak481	137	657	158	336	434	562
gRNA33870	Peak1460	490	637	247	181	435	389
gRNA15509	Peak637	15	270	38	133	106	148
gRNA11891	Peak485	3	58	0	99	0	68
gRNA34042	Peak1466	146	1285	238	581	398	1028
gRNA11186	Peak458	645	2024	550	997	1148	1623
gRNA13240	Peak539	217	1231	188	573	406	954
gRNA26900	Peak1124	1	40	0	23	4	88
gRNA16045	Peak659	304	550	455	298	735	451
gRNA38875	Peak1679	140	264	189	215	141	235
gRNA31547	Peak1357	24	117	0	72	51	102
gRNA33736	Peak1455	178	1763	229	728	177	1264
gRNA865	Peak27	10	286	27	62	10	102
gRNA11010	Peak452	78	231	26	135	31	165
gRNA32694	Peak1411	37	164	16	58	7	96
gRNA26138	Peak1094	0	371	42	189	13	403
gRNA39522	Peak1707	228	2912	290	1191	368	2730
gRNA37798	Peak1630	0	10	12	5	0	1
gRNA28960	Peak1228	64	899	40	558	110	775
gRNA9011	Peak368	1394	1730	2183	863	2992	1416
gRNA33037	Peak1424	1121	2694	1630	1192	2299	2234
gRNA20405	Peak847	85	1336	25	815	101	1095
gRNA21678	Peak888	45	911	24	323	238	572
gRNA10454	Peak431	10	537	0	260	10	307
gRNA154	Peak5	194	2366	116	1188	394	2283
gRNA2865	Peak119	0	0	0	0	0	0
gRNA36153	Peak1570	112	1650	136	1031	212	1376
gRNA6489	Peak274	2	64	1	52	0	80
gRNA11872	Peak484	31	1056	98	555	96	915
gRNA31984	Peak1371	28	282	36	110	76	143
gRNA27795	Peak1173	1406	2339	1627	1114	3834	1711
gRNA8268	Peak339	923	1720	1694	797	1365	1372
gRNA30301	Peak1302	0	0	0	0	0	0
gRNA30403	Peak1307	93	988	159	388	138	913
gRNA9929	Peak412	0	96	1	35	0	56
gRNA162	Peak6	45	414	18	250	16	326
gRNA1724	Peak66	0	116	0	24	0	62
gRNA19705	Peak818	0	227	2	119	11	149
gRNA3639	Peak159	0	184	1	166	0	224
gRNA32039	Peak1372	135	1684	183	657	239	1433
gRNA10244	Peak426	13	316	8	139	20	149
gRNA27133	Peak1140	257	1172	274	633	272	983
gRNA38490	Peak1665	2	401	0	149	17	291
gRNA3613	Peak158	0	7	0	24	16	2
gRNA10300	Peak429	116	860	61	362	142	686
gRNA13864	Peak566	26	491	17	347	26	449
gRNA17612	Peak732	9	473	5	219	42	380
gRNA21797	Peak894	2	341	20	140	0	204
gRNA20133	Peak836	107	347	74	146	119	328
gRNA23274	Peak950	0	0	0	0	0	0
gRNA26257	Peak1097	67	850	29	371	185	534
gRNA36657	Peak1594	50	261	80	126	123	222
gRNA26299	Peak1097	0	144	0	73	0	130
gRNA31814	Peak1366	1022	1277	556	590	3492	889
gRNA35232	Peak1533	232	465	165	115	438	186
gRNA7522	Peak304	0	75	0	37	0	30
gRNA36828	Peak1598	0	80	12	36	0	20
gRNA31117	Peak1343	82	938	147	488	360	484
gRNA5341	Peak225	0	76	0	9	0	36
gRNA7070	Peak288	47	1253	39	586	91	1135
gRNA12261	Peak499	304	1659	368	650	591	1111
gRNA26881	Peak1124	1	124	3	81	12	102
gRNA1457	Peak57	12	884	10	372	35	643
gRNA37619	Peak1625	0	0	0	0	0	0
gRNA30898	Peak1336	175	1383	303	639	426	924
gRNA38052	Peak1645	17	505	54	314	150	433
gRNA2069	Peak82	66	1032	105	434	100	696
gRNA6927	Peak286	13	226	11	89	0	148
gRNA2430	Peak99	0	9	0	0	6	10
gRNA9309	Peak381	35	277	81	141	160	242
gRNA38247	Peak1656	50	414	49	257	139	403
gRNA5413	Peak228	455	1370	564	804	797	986
gRNA38552	Peak1668	237	326	158	157	267	398
gRNA28593	Peak1211	49	446	8	212	49	277
gRNA3534	Peak153	452	514	948	274	597	327
gRNA12071	Peak491	4	533	9	121	10	453
gRNA9107	Peak373	0	153	3	59	4	130
gRNA31409	Peak1353	3	182	151	64	9	103
gRNA6475	Peak272	0	36	0	39	0	32
gRNA20127	Peak836	2	516	6	297	0	526
gRNA33747	Peak1455	234	422	440	241	295	324
gRNA16052	Peak659	7	270	26	68	31	153
gRNA19580	Peak814	77	1113	60	460	148	664
gRNA35319	Peak1535	356	735	128	471	150	654
gRNA31195	Peak1346	570	1673	1306	706	1239	1206
gRNA35545	Peak1544	13	508	15	264	82	236
gRNA30858	Peak1334	279	368	403	131	634	339
gRNA12876	Peak522	0	75	3	36	0	87
gRNA25036	Peak1035	89	992	174	430	182	488
gRNA35351	Peak1536	2	154	0	84	9	209
gRNA6896	Peak284	86	1050	183	604	124	743
gRNA9227	Peak376	179	431	497	284	1029	408
gRNA12902	Peak523	0	15	0	47	0	49
gRNA27323	Peak1149	522	268	630	140	1223	282
gRNA20115	Peak834	1	43	2	5	0	46
gRNA1686	Peak65	0	0	0	0	0	0
gRNA15507	Peak637	189	1074	202	562	370	1054
gRNA9830	Peak409	14	166	15	95	45	69
gRNA28254	Peak1194	276	1273	250	624	288	1214
gRNA23752	Peak968	196	1917	298	922	721	1554
gRNA7486	Peak300	60	574	31	230	96	498
gRNA26084	Peak1091	12	65	0	44	16	33
gRNA28152	Peak1188	107	941	106	483	166	823
gRNA23757	Peak968	0	121	6	58	11	57
gRNA23075	Peak941	506	1532	225	631	545	1056
gRNA19115	Peak783	27	463	18	266	232	402
gRNA3102	Peak130	1	223	12	131	31	290
gRNA16099	Peak662	6	367	0	157	0	267
gRNA1598	Peak61	1	118	0	12	0	86
gRNA30470	Peak1310	107	331	189	143	134	329
gRNA34883	Peak1519	8	1058	13	501	17	833
gRNA1172	Peak41	27	159	0	77	0	107
gRNA27271	Peak1147	154	324	251	166	425	193
gRNA8465	Peak347	137	578	142	305	243	467
gRNA23740	Peak968	4	128	4	66	40	159
gRNA8715	Peak354	6	383	14	224	64	260
gRNA14519	Peak592	16	360	0	108	0	241
gRNA10678	Peak440	616	793	534	453	540	539
gRNA34076	Peak1469	492	1087	515	539	698	729
gRNA29315	Peak1240	14	133	14	49	66	116
gRNA960	Peak30	0	3	0	1	0	3
gRNA29929	Peak1275	93	101	76	61	46	86
gRNA29684	Peak1262	5	145	20	88	10	162
gRNA14527	Peak593	40	248	5	138	49	336
gRNA27358	Peak1151	46	1181	95	391	193	788
gRNA30776	Peak1328	0	0	0	0	0	9
gRNA30217	Peak1297	3	135	9	90	0	121
gRNA36400	Peak1585	118	1162	66	620	154	766
gRNA39373	Peak1700	115	1980	91	1054	204	1862
gRNA31955	Peak1370	54	727	54	388	87	662
gRNA30203	Peak1296	79	1099	71	549	57	998
gRNA2455	Peak100	45	432	32	152	89	321
gRNA29639	Peak1260	149	490	398	229	424	387
gRNA29043	Peak1229	0	24	0	14	0	16
gRNA12153	Peak495	7	270	0	64	8	214
gRNA35787	Peak1553	18	453	9	158	52	328
gRNA15106	Peak622	2	154	0	101	15	114
gRNA5914	Peak248	4	251	21	89	158	107
gRNA20802	Peak863	157	714	95	393	152	697
gRNA12163	Peak495	0	98	0	53	0	108
gRNA30480	Peak1310	96	637	54	309	56	406
gRNA17593	Peak731	10	209	24	80	7	117
gRNA23859	Peak973	291	2052	388	779	859	1765
gRNA26036	Peak1087	1	124	17	81	0	131
gRNA31816	Peak1366	1	62	0	22	5	91
gRNA3137	Peak133	45	522	29	290	26	505
gRNA31480	Peak1355	33	274	34	219	120	261
gRNA17590	Peak731	447	1503	205	800	277	1284
gRNA39555	Peak1711	20	103	9	48	41	35
gRNA17354	Peak722	0	16	0	11	1	8
gRNA38196	Peak1653	35	1722	33	721	38	999
gRNA14322	Peak586	2	412	6	211	70	312
gRNA4816	Peak205	657	724	1626	234	1933	399
gRNA223	Peak8	0	109	0	40	6	80
gRNA8607	Peak352	11	99	6	26	1	60
gRNA18078	Peak745	0	16	0	2	0	20
gRNA37210	Peak1612	0	62	0	27	0	74
gRNA25848	Peak1074	16	70	4	58	40	84
gRNA38464	Peak1665	57	297	23	108	187	335
gRNA24902	Peak1030	93	1978	144	991	97	1322
gRNA27820	Peak1174	15	278	13	140	15	208
gRNA15316	Peak631	200	888	419	469	575	703
gRNA13830	Peak563	29	434	38	234	93	582
gRNA15218	Peak627	56	201	79	95	149	178
gRNA18409	Peak756	93	958	56	357	211	623
gRNA6457	Peak272	65	222	272	115	468	229
gRNA13239	Peak539	0	102	0	73	0	98
gRNA29314	Peak1240	68	403	134	213	124	273
gRNA22432	Peak915	240	1163	411	588	518	1087
gRNA35740	Peak1552	136	705	178	369	149	667
gRNA38475	Peak1665	27	231	12	120	55	160
gRNA1769	Peak69	0	12	10	0	0	2
gRNA4087	Peak178	0	53	0	78	0	65
gRNA1737	Peak68	98	717	50	318	154	511
gRNA5713	Peak237	0	0	0	0	0	0
gRNA38429	Peak1664	4	88	0	38	0	42
gRNA32831	Peak1417	35	583	12	288	14	397
gRNA26347	Peak1097	238	779	458	429	539	542
gRNA31901	Peak1369	61	415	131	192	117	357
gRNA32823	Peak1417	1	123	0	89	0	159
gRNA15555	Peak638	0	0	0	0	0	0
gRNA29888	Peak1271	33	220	29	71	65	169
gRNA22422	Peak915	194	1047	90	515	189	830
gRNA38926	Peak1681	28	161	40	82	33	113
gRNA16463	Peak675	217	416	199	222	154	293
gRNA34793	Peak1516	0	133	0	26	0	72
gRNA11680	Peak478	0	981	3	513	5	757
gRNA33141	Peak1429	390	2493	640	1022	814	1972
gRNA13300	Peak542	0	53	0	12	14	28
gRNA1315	Peak46	151	306	93	81	460	200
gRNA1709	Peak66	0	45	0	10	0	34
gRNA7632	Peak307	0	258	4	41	0	109
gRNA18938	Peak776	868	2631	669	1343	809	2468
gRNA5623	Peak234	2873	1841	1628	863	2340	1288
gRNA8648	Peak353	2	116	3	71	0	116
gRNA29808	Peak1267	91	882	240	363	418	678
gRNA14541	Peak593	70	1341	60	753	23	1162
gRNA17284	Peak716	76	438	39	202	30	339
gRNA7620	Peak306	14	424	27	183	251	357
gRNA1076	Peak37	0	24	0	0	0	2
gRNA37402	Peak1616	313	646	229	277	456	483
gRNA2121	Peak85	150	505	208	236	253	450
gRNA35858	Peak1558	5	117	0	72	0	123
gRNA14843	Peak609	0	0	0	0	0	1
gRNA37272	Peak1614	175	308	42	153	359	274
gRNA8598	Peak352	1008	1360	85	667	192	1332
gRNA31381	Peak1353	43	108	79	79	33	127
gRNA18916	Peak776	241	1663	234	722	479	1399
gRNA5098	Peak213	1030	926	1010	571	784	774
gRNA28562	Peak1209	33	222	28	79	40	145
gRNA43	Peak2	46	992	8	373	27	721
gRNA16498	Peak677	66	199	317	180	486	310
gRNA17839	Peak739	24	380	28	200	18	254
gRNA1958	Peak77	61	565	33	288	145	604
gRNA28634	Peak1213	36	281	135	222	401	338
gRNA28584	Peak1211	7	281	9	185	2	222
gRNA25735	Peak1068	208	3020	417	1433	743	2276
gRNA14016	Peak570	292	1142	254	584	382	1005
gRNA31684	Peak1362	7	235	0	153	3	158
gRNA2440	Peak100	12	386	17	95	106	317
gRNA10603	Peak436	17	196	0	114	18	192
gRNA37529	Peak1622	612	878	2041	316	2848	642
gRNA39030	Peak1683	33	477	30	170	27	364
gRNA17914	Peak742	588	1040	954	427	1217	862
gRNA19033	Peak778	336	813	347	387	286	628
gRNA38441	Peak1665	10	171	2	53	20	155
gRNA31004	Peak1340	15	171	13	48	9	88
gRNA37344	Peak1615	10	401	13	184	35	264
gRNA17499	Peak728	2100	2255	2930	1138	4959	1731
gRNA3675	Peak161	181	573	213	368	272	470
gRNA28975	Peak1228	49	69	14	24	68	96
gRNA26778	Peak1118	330	1283	406	481	590	917
gRNA38703	Peak1673	36	646	57	279	146	482
gRNA30958	Peak1338	323	1886	195	848	401	1402
gRNA17756	Peak737	41	211	102	106	36	220
gRNA29456	Peak1247	155	2063	163	761	301	1493
gRNA9332	Peak381	22	399	10	110	115	288
gRNA36769	Peak1597	1	259	46	143	67	285
gRNA25018	Peak1035	0	385	0	182	0	203
gRNA33149	Peak1429	0	151	11	29	0	51
gRNA15549	Peak638	82	528	72	283	234	395
gRNA11781	Peak481	27	867	63	397	25	622
gRNA31501	Peak1355	90	477	85	283	216	283
gRNA32623	Peak1408	0	157	1	124	5	152
gRNA767	Peak23	0	308	0	50	0	163
gRNA38989	Peak1682	0	96	0	65	0	46
gRNA2314	Peak94	51	572	35	277	33	569
gRNA11970	Peak486	359	165	424	57	261	85
gRNA7536	Peak304	0	0	0	0	0	11
gRNA26286	Peak1097	601	290	551	139	1358	190
gRNA1851	Peak71	698	2032	1132	975	1283	1776
gRNA15622	Peak641	203	1167	185	560	272	806
gRNA22751	Peak927	18	578	15	212	32	459
gRNA15179	Peak625	4	188	3	176	38	132
gRNA8006	Peak324	13	43	0	0	0	16
gRNA33530	Peak1445	21	290	9	113	36	193
gRNA34920	Peak1522	0	66	33	35	9	51
gRNA27837	Peak1174	1053	1470	422	837	636	1644
gRNA31147	Peak1344	1	192	4	83	4	145
gRNA18584	Peak761	0	0	0	4	0	10
gRNA19237	Peak792	12	211	2	172	45	250
gRNA1245	Peak44	17	245	8	82	79	125
gRNA27294	Peak1148	28	355	34	232	28	281
gRNA18062	Peak745	0	1	0	0	0	0
gRNA21759	Peak893	227	1069	308	515	232	827
gRNA6766	Peak282	0	118	1	57	0	45
gRNA33228	Peak1432	176	800	168	389	415	544
gRNA28962	Peak1228	21	171	14	85	182	151
gRNA24951	Peak1034	2	163	0	78	2	182
gRNA17615	Peak732	42	486	73	192	42	391
gRNA2326	Peak94	1323	495	918	246	929	344
gRNA26498	Peak1106	7	361	0	235	27	323
gRNA31902	Peak1369	10	308	21	147	103	176
gRNA25760	Peak1069	0	0	0	0	0	0
gRNA32826	Peak1417	37	211	56	153	56	133
gRNA21621	Peak886	3	279	15	137	20	151
gRNA363	Peak11	2	167	43	27	19	74
gRNA38615	Peak1670	0	0	0	0	0	0
gRNA33968	Peak1464	0	39	0	24	7	36
gRNA27227	Peak1144	190	821	278	493	373	641
gRNA19610	Peak815	11	240	31	169	12	207
gRNA1233	Peak44	0	0	0	0	0	0
gRNA33635	Peak1449	0	248	0	118	21	274
gRNA3762	Peak164	3	52	0	22	46	3
gRNA31251	Peak1348	105	1550	88	669	165	1222
gRNA26761	Peak1118	96	5	170	48	29	39
gRNA19840	Peak823	3	470	0	196	25	210
gRNA30884	Peak1335	0	107	0	13	0	112
gRNA24511	Peak1010	66	458	67	158	62	182
gRNA4302	Peak185	0	102	5	102	2	124
gRNA18420	Peak756	4	47	0	21	0	47
gRNA24181	Peak990	1	56	0	26	0	2
gRNA14181	Peak576	3	135	3	1	5	73
gRNA2775	Peak115	1	67	8	32	1	31
gRNA7612	Peak306	25	142	10	118	48	154
gRNA32937	Peak1420	112	1886	263	733	174	1679
gRNA36443	Peak1586	8	77	3	69	7	80
gRNA18685	Peak764	54	362	11	126	0	346
gRNA39034	Peak1683	59	747	48	279	59	646
gRNA28074	Peak1185	17	570	56	220	96	293
gRNA12943	Peak524	122	501	113	160	304	352
gRNA10363	Peak431	28	348	31	149	11	251
gRNA7735	Peak310	0	229	8	89	11	150
gRNA36726	Peak1597	16	356	15	168	19	317
gRNA21791	Peak894	135	377	94	201	96	590
gRNA31802	Peak1365	0	0	0	0	0	0
gRNA15518	Peak637	79	1291	64	526	113	987
gRNA4129	Peak180	193	402	128	185	193	416
gRNA22970	Peak936	1119	3685	1489	1687	2181	2737
gRNA24073	Peak984	194	1326	235	476	166	617
gRNA37442	Peak1617	109	203	63	176	18	218
gRNA38592	Peak1670	6	681	1	289	16	434
gRNA775	Peak23	39	506	74	131	78	365
gRNA24782	Peak1023	473	545	353	233	729	268
gRNA31972	Peak1371	429	1019	850	454	502	682
gRNA9769	Peak406	0	71	1	22	6	49
gRNA7914	Peak320	11	227	5	135	18	238
gRNA14506	Peak591	95	333	160	149	42	171
gRNA36041	Peak1565	57	597	16	387	64	554
gRNA33869	Peak1460	261	2287	95	1123	163	1804
gRNA26932	Peak1126	70	267	47	132	39	185
gRNA38972	Peak1682	0	45	4	36	0	53
gRNA14165	Peak576	2	42	0	14	0	31
gRNA19990	Peak829	86	1581	127	685	148	1358
gRNA6869	Peak284	58	1404	132	703	83	1222
gRNA38400	Peak1664	663	803	476	301	1499	581
gRNA27276	Peak1147	1045	661	1107	254	522	495
gRNA29778	Peak1266	22	480	26	265	21	463
gRNA7092	Peak288	0	181	2	62	2	97
gRNA25251	Peak1044	34	509	33	148	35	392
gRNA7977	Peak323	7	528	13	280	54	366
gRNA35756	Peak1552	30	146	9	76	24	167
gRNA20046	Peak832	49	1030	33	482	130	778
gRNA12288	Peak500	29	320	12	168	31	192
gRNA5340	Peak225	67	553	38	250	99	352
gRNA38696	Peak1673	0	0	0	0	0	0
gRNA4336	Peak186	7	135	1	88	6	120
gRNA31925	Peak1370	66	1670	19	969	113	1398
gRNA23551	Peak962	57	704	10	332	54	630
gRNA39386	Peak1701	0	63	0	22	4	39
gRNA37682	Peak1626	0	46	0	9	9	23
gRNA36002	Peak1564	0	65	0	0	0	25
gRNA13312	Peak542	24	162	26	107	63	186
gRNA20363	Peak845	12	148	11	71	8	109
gRNA17743	Peak736	180	1246	157	584	397	1198
gRNA21826	Peak894	92	748	62	298	223	552
gRNA6397	Peak270	8	129	4	95	25	148
gRNA32662	Peak1409	28	413	4	197	36	259
gRNA34576	Peak1500	58	390	29	337	16	434
gRNA32431	Peak1397	0	62	1	42	0	26
gRNA9623	Peak398	95	1701	358	754	442	1188
gRNA13741	Peak560	0	410	4	119	0	307
gRNA9515	Peak390	35	444	8	141	64	296
gRNA753	Peak23	0	0	0	0	0	0
gRNA21957	Peak898	428	807	357	332	815	541
gRNA35352	Peak1536	8	337	4	213	11	260
gRNA13752	Peak560	159	1097	174	463	504	740
gRNA36413	Peak1585	84	768	122	334	149	689
gRNA36637	Peak1594	0	8	0	26	0	23
gRNA14973	Peak616	0	51	1	8	0	0
gRNA16374	Peak673	245	170	387	80	780	109
gRNA3962	Peak171	2	18	0	6	18	15
gRNA34922	Peak1522	22	585	9	297	41	417
gRNA14972	Peak616	648	1982	551	935	1188	1489
gRNA8651	Peak353	184	964	54	471	40	927
gRNA3692	Peak161	1165	1126	867	479	1200	869
gRNA14926	Peak613	0	75	0	42	0	51
gRNA25124	Peak1039	97	283	8	86	89	126
gRNA35652	Peak1548	49	681	39	261	99	504
gRNA33974	Peak1464	0	0	0	0	0	0
gRNA32876	Peak1418	183	871	673	472	569	880
gRNA3679	Peak161	10	48	0	45	0	26
gRNA23256	Peak950	21	361	17	176	11	423
gRNA20923	Peak866	191	2038	262	785	396	1373
gRNA17819	Peak738	0	39	0	25	0	36
gRNA35746	Peak1552	24	401	4	198	184	353
gRNA13359	Peak544	167	422	147	171	185	296
gRNA18756	Peak768	62	153	223	72	60	211
gRNA27189	Peak1143	72	201	55	95	73	91
gRNA16443	Peak675	0	10	0	6	1	28
gRNA1141	Peak39	11	298	8	81	55	151
gRNA36468	Peak1586	209	284	72	90	245	166
gRNA37935	Peak1638	6	527	5	353	9	390
gRNA37665	Peak1626	13	347	4	117	28	213
gRNA13711	Peak559	8471	601	9633	363	17116	617
gRNA29052	Peak1230	498	1735	911	693	478	1228
gRNA17906	Peak742	15	287	4	177	12	336
gRNA38765	Peak1676	6	173	11	156	9	266
gRNA32905	Peak1418	7	44	0	9	19	4
gRNA21564	Peak884	1854	1183	1667	499	3112	960
gRNA30219	Peak1297	1	146	6	47	14	81
gRNA25830	Peak1073	0	0	0	0	0	0
gRNA13330	Peak543	132	800	68	293	275	535
gRNA21676	Peak888	107	1091	195	486	345	625
gRNA15551	Peak638	29	376	57	169	44	393
gRNA5909	Peak248	644	1825	635	923	776	1619
gRNA38152	Peak1649	51	221	7	82	13	95
gRNA17384	Peak724	186	499	103	247	114	474
gRNA29179	Peak1234	0	201	0	104	5	193
gRNA38609	Peak1670	206	1266	223	615	541	716
gRNA18271	Peak752	118	2306	178	1031	196	1910
gRNA33630	Peak1449	49	346	62	228	73	248
gRNA39562	Peak1711	2	182	3	107	1	164
gRNA19249	Peak792	40	796	24	462	91	486
gRNA12086	Peak492	310	1094	288	715	321	998
gRNA25913	Peak1078	67	634	20	344	62	443
gRNA3113	Peak131	17	166	16	76	19	198
gRNA30733	Peak1326	0	35	0	0	52	9
gRNA22194	Peak905	48	307	18	94	52	175
gRNA18405	Peak756	79	225	84	110	138	306
gRNA36774	Peak1597	66	941	131	625	76	1107
gRNA18126	Peak747	43	635	34	312	141	381
gRNA39507	Peak1707	6	85	0	19	36	68
gRNA8822	Peak357	151	566	335	187	355	268
gRNA31366	Peak1352	0	8	0	8	0	37
gRNA11460	Peak468	9	334	14	74	6	161
gRNA3809	Peak167	96	1193	73	541	80	893
gRNA28028	Peak1184	1	78	10	21	7	61
gRNA2144	Peak86	0	87	7	69	5	163
gRNA17648	Peak733	0	0	0	0	0	0
gRNA860	Peak27	34	552	23	229	115	453
gRNA26318	Peak1097	129	864	146	500	223	612
gRNA8844	Peak358	14	186	23	50	19	199
gRNA6962	Peak287	19	383	4	190	10	245
gRNA39527	Peak1707	166	1474	123	769	190	1141
gRNA17525	Peak729	1426	2476	1894	1149	1924	1870
gRNA38094	Peak1647	192	964	143	345	263	603
gRNA8494	Peak348	144	1104	98	591	170	913
gRNA1107	Peak37	38	679	80	307	39	505
gRNA35467	Peak1540	600	1469	441	776	841	1266
gRNA17441	Peak727	43	402	35	197	86	252
gRNA12332	Peak503	0	203	4	68	17	85
gRNA29133	Peak1232	385	1040	606	468	1055	695
gRNA27983	Peak1182	128	163	125	57	133	228
gRNA37927	Peak1638	0	132	3	107	0	201
gRNA23612	Peak964	657	344	1007	123	1625	160
gRNA17579	Peak731	41	681	27	265	105	574
gRNA37561	Peak1623	30	284	54	70	52	95
gRNA21579	Peak885	84	826	32	380	72	664
gRNA29788	Peak1266	219	2417	210	1410	348	2121
gRNA30408	Peak1307	39	609	41	329	113	528
gRNA4052	Peak177	100	979	187	418	135	613
gRNA17697	Peak735	309	1016	136	580	280	717
gRNA17924	Peak742	0	49	0	66	0	80
gRNA22949	Peak936	392	1999	242	1132	522	1692
gRNA35403	Peak1538	55	395	95	291	67	297
gRNA24454	Peak1009	0	20	0	22	0	12
gRNA32984	Peak1423	0	100	11	40	15	60
gRNA8914	Peak363	32	802	19	291	57	525
gRNA33878	Peak1460	0	25	8	0	0	3
gRNA23367	Peak955	13	198	20	111	15	162
gRNA8011	Peak325	28	130	31	86	33	99
gRNA11322	Peak462	145	723	101	353	136	678
gRNA33133	Peak1429	18	331	18	177	27	200
gRNA28264	Peak1194	26	208	5	137	14	142
gRNA35676	Peak1548	406	583	232	333	586	563
gRNA10441	Peak431	36	842	29	388	107	559
gRNA18297	Peak752	0	35	5	16	11	6
gRNA14639	Peak598	399	666	555	264	421	428
gRNA24124	Peak986	107	815	48	335	76	619
gRNA33034	Peak1424	146	1130	129	512	278	757
gRNA23350	Peak953	13	455	3	165	6	320
gRNA19036	Peak778	23	10	5	0	0	6
gRNA18959	Peak776	13	227	2	130	32	185
gRNA19306	Peak795	144	892	115	412	246	847
gRNA23653	Peak965	42	168	78	181	42	156
gRNA1018	Peak33	143	705	88	253	350	495
gRNA30414	Peak1308	84	866	38	368	93	568
gRNA31693	Peak1362	566	2358	495	1074	782	1678
gRNA27324	Peak1149	0	0	0	0	0	0
gRNA6947	Peak287	156	720	85	354	196	418
gRNA23646	Peak965	164	911	64	493	174	670
gRNA4303	Peak185	37	492	84	187	82	407
gRNA12100	Peak493	23	316	3	217	89	187
gRNA5250	Peak221	0	49	0	7	0	0
gRNA9594	Peak397	0	27	0	22	0	13
gRNA37013	Peak1604	1274	3861	1204	1802	1771	2924
gRNA11864	Peak484	14	225	10	227	10	201
gRNA24313	Peak1001	29	729	0	400	37	598
gRNA4283	Peak184	0	0	0	0	0	0
gRNA1617	Peak61	51	693	15	380	106	448
gRNA37377	Peak1616	65	388	76	114	36	298
gRNA9146	Peak374	3	114	0	29	54	80
gRNA26921	Peak1125	8	63	0	17	25	86
gRNA12338	Peak503	1	76	0	24	1	31
gRNA20143	Peak836	492	1055	458	414	732	857
gRNA23065	Peak941	0	32	4	14	8	34
gRNA9577	Peak395	388	1129	700	404	402	766
gRNA11482	Peak469	37	261	31	128	21	142
gRNA6008	Peak253	16	378	59	258	25	360
gRNA30230	Peak1298	87	457	145	256	476	474
gRNA15800	Peak648	250	710	48	236	56	616
gRNA37151	Peak1609	6	231	1	107	9	200
gRNA27608	Peak1161	279	1185	135	443	42	880
gRNA21646	Peak887	24	907	6	451	10	653
gRNA29949	Peak1277	0	382	8	116	3	156
gRNA39267	Peak1693	22	448	4	203	61	276
gRNA1675	Peak64	9	316	93	103	172	259
gRNA5925	Peak248	31	302	35	91	6	244
gRNA3036	Peak126	1300	2302	1762	857	1604	2009
gRNA696	Peak20	2	102	0	87	27	147
gRNA32120	Peak1376	104	431	38	165	61	336
gRNA3173	Peak135	117	776	83	354	92	518
gRNA13876	Peak566	1185	1265	1910	553	2860	953
gRNA21031	Peak871	104	509	23	219	3	414
gRNA28629	Peak1213	188	320	45	179	130	326
gRNA39443	Peak1704	89	593	226	267	315	416
gRNA14966	Peak616	111	193	71	88	188	143
gRNA38666	Peak1672	92	673	178	317	260	432
gRNA34748	Peak1510	0	135	0	77	0	52
gRNA16208	Peak667	546	2939	744	1286	1258	2308
gRNA35688	Peak1548	2	119	7	44	0	84
gRNA17560	Peak730	21	651	17	336	13	571
gRNA38856	Peak1679	48	579	43	272	4	352
gRNA9421	Peak385	19	853	39	521	46	521
gRNA12124	Peak494	558	884	187	533	2530	566
gRNA7986	Peak324	125	1805	256	779	315	1274
gRNA35534	Peak1544	49	590	72	373	109	576
gRNA7656	Peak308	184	790	93	377	125	652
gRNA13679	Peak557	115	671	42	337	285	622
gRNA2632	Peak107	436	3511	262	1617	368	2625
gRNA3510	Peak151	454	552	515	436	209	583
gRNA14992	Peak616	79	241	88	179	82	246
gRNA11130	Peak457	10	84	14	24	0	43
gRNA22912	Peak935	12	154	20	169	14	141
gRNA26631	Peak1112	242	500	213	234	360	363
gRNA9490	Peak388	0	73	0	102	0	130
gRNA3234	Peak137	75	955	28	373	57	1010
gRNA21053	Peak872	268	2707	325	1309	607	1969
gRNA22980	Peak936	0	63	2	22	0	61
gRNA34204	Peak1476	1832	4947	1691	2076	2797	3680
gRNA3554	Peak154	334	2240	309	690	482	1573
gRNA10307	Peak429	22	454	11	126	72	330
gRNA29274	Peak1238	9	480	18	325	74	381
gRNA25050	Peak1035	209	667	71	403	581	539
gRNA24214	Peak992	3	253	9	61	11	247
gRNA17319	Peak720	0	40	0	3	9	41
gRNA6011	Peak253	0	24	0	46	11	27
gRNA20331	Peak844	1533	156	624	41	3273	116
gRNA17704	Peak735	0	0	0	0	0	0
gRNA2990	Peak123	246	1044	1462	628	617	716
gRNA39532	Peak1709	35	729	92	307	49	607
gRNA31861	Peak1367	9	513	0	166	39	394
gRNA14105	Peak575	11	71	24	13	35	69
gRNA6580	Peak277	110	297	182	114	42	231
gRNA26859	Peak1124	0	70	6	8	0	41
gRNA24800	Peak1025	13	469	5	121	3	228
gRNA23822	Peak972	6	139	2	51	7	134
gRNA1656	Peak63	2	74	0	77	0	110
gRNA23838	Peak972	1	225	1	105	0	106
gRNA11127	Peak457	0	90	1	42	0	18
gRNA26723	Peak1117	327	2220	267	911	374	1676
gRNA21610	Peak886	370	1599	906	943	951	1272
gRNA17480	Peak728	234	907	425	388	377	559
gRNA21061	Peak872	1	142	14	48	17	46
gRNA24905	Peak1030	72	912	200	330	88	677
gRNA36974	Peak1602	123	1131	205	386	216	733
gRNA19235	Peak791	5	99	0	77	0	156
gRNA6090	Peak257	0	19	0	0	0	4
gRNA26903	Peak1124	0	133	3	49	15	60
gRNA36509	Peak1589	8	590	101	194	176	510
gRNA15380	Peak632	898	1922	708	871	2486	1508
gRNA4982	Peak210	0	224	1	121	37	152
gRNA18814	Peak771	13	479	2	202	84	308
gRNA20980	Peak868	919	965	1744	369	2872	608
gRNA1856	Peak71	125	665	79	226	78	534
gRNA24704	Peak1020	261	1724	292	682	243	1252
gRNA24809	Peak1025	7	241	3	94	0	149
gRNA2615	Peak107	3	227	0	120	8	229
gRNA32947	Peak1421	2183	1927	1925	842	3852	1452
gRNA8610	Peak352	47	519	64	254	98	352
gRNA28756	Peak1220	388	2242	442	1118	481	1670
gRNA21815	Peak894	17	513	6	326	5	371
gRNA17076	Peak704	39	1724	11	892	107	1743
gRNA13366	Peak544	19	330	0	122	38	251
gRNA31806	Peak1365	174	251	68	119	182	226
gRNA12546	Peak511	91	739	36	334	50	632
gRNA2518	Peak103	111	390	220	170	852	326
gRNA37827	Peak1632	311	1078	278	586	597	842
gRNA27206	Peak1143	33	207	23	120	81	164
gRNA26561	Peak1108	30	107	48	84	88	73
gRNA19937	Peak827	89	585	88	207	34	401
gRNA31194	Peak1345	892	4437	676	1851	1112	3437
gRNA10760	Peak443	30	317	55	179	38	277
gRNA6043	Peak255	4	692	2	309	0	480
gRNA3140	Peak133	364	1214	453	705	597	1034
gRNA34601	Peak1500	74	503	34	165	74	210
gRNA18520	Peak759	8189	3590	12517	1762	18458	3099
gRNA36420	Peak1585	480	844	265	350	146	840
gRNA38467	Peak1665	0	86	0	36	0	46
gRNA39525	Peak1707	14	217	9	127	48	142
gRNA23049	Peak940	289	2289	518	994	830	1637
gRNA28678	Peak1216	143	3120	297	1569	330	2814
gRNA1774	Peak69	3	317	5	159	110	270
gRNA31440	Peak1354	51	627	17	312	71	537
gRNA9363	Peak383	0	185	17	125	2	176
gRNA21003	Peak868	0	155	0	59	6	71
gRNA12814	Peak520	7	69	0	55	34	90
gRNA9729	Peak405	76	820	80	411	111	622
gRNA38810	Peak1678	179	451	179	193	185	464
gRNA11161	Peak458	115	683	212	236	242	436
gRNA37658	Peak1626	690	825	972	444	1069	598
gRNA39579	Peak1713	281	1341	287	467	471	635
gRNA4963	Peak210	0	0	0	0	0	0
gRNA18172	Peak749	24	288	2	160	59	195
gRNA8665	Peak353	384	1363	477	648	293	619
gRNA28222	Peak1191	7	507	23	341	20	476
gRNA859	Peak27	8	17	0	13	0	12
gRNA16700	Peak685	168	569	698	226	612	426
gRNA29819	Peak1268	13	280	13	93	64	149
gRNA11873	Peak484	1551	3627	1941	1639	2443	3331
gRNA26475	Peak1105	126	822	232	362	292	626
gRNA24925	Peak1032	9	99	0	61	5	82
gRNA5030	Peak211	0	20	0	17	0	34
gRNA2165	Peak87	1	308	10	82	3	269
gRNA32464	Peak1398	3850	1779	9668	714	10609	1381
gRNA19576	Peak814	0	0	0	0	0	0
gRNA11517	Peak470	11	118	0	22	0	102
gRNA29343	Peak1241	290	440	518	180	333	334
gRNA11129	Peak457	33	499	35	294	60	484
gRNA25885	Peak1076	0	64	1	16	0	81
gRNA18266	Peak752	104	921	103	491	361	994
gRNA26351	Peak1097	9	323	56	98	94	263
gRNA2471	Peak101	20419	2445	20830	1131	27010	1791
gRNA7461	Peak299	424	1119	243	690	664	1208
gRNA24679	Peak1020	8	171	5	82	2	133
gRNA20440	Peak847	97	479	61	148	247	324
gRNA24163	Peak990	85	717	169	410	187	752
gRNA11374	Peak464	27	350	65	130	172	269
gRNA8409	Peak345	41	641	131	300	59	583
gRNA39338	Peak1698	237	1129	300	454	500	776
gRNA101	Peak3	70	791	59	350	152	681
gRNA1708	Peak66	36	537	38	215	40	297
gRNA21795	Peak894	12	986	24	534	88	875
gRNA25350	Peak1049	238	3189	261	1334	703	2240
gRNA31340	Peak1352	27	708	32	301	79	756
gRNA17814	Peak738	100	396	32	193	123	318
gRNA28651	Peak1214	59	653	33	351	70	598
gRNA34399	Peak1487	31	356	162	118	257	218
gRNA3696	Peak162	0	89	4	9	0	55
gRNA26618	Peak1111	3	165	3	63	69	118
gRNA21275	Peak879	0	20	1	7	0	22
gRNA24771	Peak1023	39	553	39	235	112	261
gRNA19977	Peak829	56	166	34	77	75	119
gRNA18569	Peak760	30	182	26	83	29	107
gRNA38739	Peak1675	59	106	4	81	7	106
gRNA26984	Peak1129	1	228	0	102	19	151
gRNA18207	Peak750	0	6	1	21	0	6
gRNA20896	Peak865	340	2471	732	1027	1063	1864
gRNA9021	Peak368	108	1120	84	509	64	835
gRNA35241	Peak1533	7	697	33	404	91	573
gRNA4946	Peak209	47	801	108	382	209	1030
gRNA2938	Peak122	0	154	0	94	0	128
gRNA2849	Peak119	0	0	0	0	0	0
gRNA29447	Peak1246	5	179	11	55	1	47
gRNA12827	Peak521	0	82	0	56	2	150
gRNA14883	Peak612	112	308	127	231	169	270
gRNA6673	Peak280	4	242	4	116	0	162
gRNA9043	Peak370	534	2005	700	997	1167	1508
gRNA27563	Peak1160	24	297	12	157	137	237
gRNA29501	Peak1249	61	32	126	24	88	34
gRNA31623	Peak1360	31	394	7	211	75	398
gRNA31907	Peak1369	2	145	2	75	0	86
gRNA16033	Peak658	78	671	61	338	122	541
gRNA6409	Peak270	302	1259	134	526	175	842
gRNA37628	Peak1625	129	1294	201	691	341	1191
gRNA25115	Peak1038	9	291	16	135	38	312
gRNA32588	Peak1406	43	1043	101	440	96	789
gRNA15211	Peak626	48	3064	110	1653	65	2837
gRNA9104	Peak373	923	1885	836	716	1467	1088
gRNA22762	Peak927	461	2257	518	1058	885	1671
gRNA31526	Peak1356	687	1256	766	630	1711	740
gRNA35694	Peak1549	0	123	0	65	0	85
gRNA31835	Peak1366	13	511	10	239	11	346
gRNA14865	Peak611	15	98	22	118	56	60
gRNA18204	Peak750	1974	4374	2146	2250	3372	3519
gRNA34480	Peak1493	402	877	618	438	613	538
gRNA30815	Peak1332	49	223	91	136	104	218
gRNA28260	Peak1194	202	640	170	333	493	507
gRNA11939	Peak486	10	344	17	87	10	204
gRNA21803	Peak894	34	269	10	130	47	301
gRNA1983	Peak78	0	6	0	1	0	2
gRNA4198	Peak182	1	51	1	14	0	64
gRNA7434	Peak296	11	544	14	244	55	469
gRNA10747	Peak442	0	15	0	2	0	12
gRNA14718	Peak603	30	315	2	135	22	214
gRNA36615	Peak1594	127	1311	149	600	61	1139
gRNA30932	Peak1337	1758	2684	2833	1283	3133	2243
gRNA3640	Peak159	235	2255	192	916	265	1864
gRNA19488	Peak810	52	845	164	419	118	635
gRNA10504	Peak432	16	242	17	166	72	331
gRNA28850	Peak1224	19	172	17	46	0	150
gRNA2773	Peak115	115	1240	182	743	574	1247
gRNA24791	Peak1025	198	472	25	122	6	341
gRNA3808	Peak167	128	1210	311	568	312	957
gRNA3418	Peak145	62	847	175	362	55	568
gRNA29806	Peak1267	57	334	33	165	8	342
gRNA26013	Peak1084	17	620	3	296	56	361
gRNA17456	Peak727	4	97	42	54	40	99
gRNA34232	Peak1478	21	624	31	402	33	664
gRNA5106	Peak213	290	1633	296	874	674	1571
gRNA17890	Peak742	4	172	2	93	0	167
gRNA20236	Peak841	40	497	49	327	59	412
gRNA11905	Peak485	208	1526	69	703	128	1371
gRNA32828	Peak1417	4	1287	1	461	12	953
gRNA30208	Peak1297	35	337	10	117	11	194
gRNA34447	Peak1490	17	356	2	216	4	317
gRNA20390	Peak847	0	75	2	20	0	8
gRNA27176	Peak1142	692	860	283	354	825	735
gRNA3486	Peak149	262	1134	137	494	245	815
gRNA32856	Peak1418	3	144	0	86	16	154
gRNA32943	Peak1420	33	182	9	143	59	133
gRNA16218	Peak667	0	33	0	0	0	5
gRNA15067	Peak620	0	61	12	6	2	44
gRNA23325	Peak952	3	59	5	36	0	65
gRNA23656	Peak965	44	682	38	364	148	480
gRNA27216	Peak1144	39	515	52	251	52	601
gRNA38763	Peak1676	20	690	17	349	94	550
gRNA5408	Peak227	4	31	0	20	123	31
gRNA11484	Peak469	3	132	10	50	44	56
gRNA13297	Peak542	294	2147	386	888	635	1952
gRNA36778	Peak1597	23	406	14	132	0	279
gRNA30837	Peak1333	52	414	96	117	198	346
gRNA4922	Peak209	1	134	5	57	0	78
gRNA27028	Peak1132	19	589	8	221	28	399
gRNA5458	Peak229	0	0	0	0	0	0
gRNA9641	Peak398	117	396	123	256	517	266
gRNA29870	Peak1270	104	947	260	430	283	710
gRNA28250	Peak1194	170	1122	193	615	237	1027
gRNA4945	Peak209	2	45	46	13	5	29
gRNA26472	Peak1105	744	3378	774	1638	905	2895
gRNA28447	Peak1203	64	549	64	262	140	533
gRNA36569	Peak1593	424	1200	184	745	686	1187
gRNA35284	Peak1534	12	291	22	157	35	284
gRNA9867	Peak410	198	3112	87	1440	209	2209
gRNA34798	Peak1516	2	201	11	59	18	144
gRNA7583	Peak305	1	41	36	53	87	62
gRNA27419	Peak1153	175	850	131	453	599	693
gRNA14579	Peak596	67	479	211	57	196	157
gRNA27213	Peak1144	10	187	0	69	14	112
gRNA3265	Peak138	949	1468	779	626	2077	1151
gRNA15059	Peak620	11	790	17	536	43	648
gRNA39398	Peak1702	33	886	32	307	111	569
gRNA1812	Peak71	128	345	243	244	296	528
gRNA38399	Peak1664	9	446	0	243	1	316
gRNA28097	Peak1186	111	657	36	333	364	562
gRNA5419	Peak228	16	139	12	55	0	120
gRNA36732	Peak1597	30	267	2	159	20	167
gRNA13691	Peak557	1	25	0	14	5	5
gRNA8956	Peak364	2424	3257	2628	1663	3298	2752
gRNA15707	Peak644	7	275	15	85	39	248
gRNA33099	Peak1427	96	639	123	452	126	468
gRNA23596	Peak963	77	985	48	545	81	696
gRNA17963	Peak743	3	508	5	260	21	437
gRNA35968	Peak1563	1125	522	1381	230	2744	521
gRNA20429	Peak847	0	20	0	15	5	25
gRNA35573	Peak1546	310	2110	204	1065	191	1655
gRNA35497	Peak1542	0	11	0	3	0	17
gRNA17792	Peak738	23	545	54	229	17	444
gRNA29978	Peak1277	26	812	39	401	45	610
gRNA36562	Peak1592	2	241	12	91	21	224
gRNA6385	Peak269	32	1010	28	358	140	610
gRNA3363	Peak142	24	508	31	244	52	450
gRNA7947	Peak321	0	0	0	0	0	0
gRNA24173	Peak990	6	380	32	220	81	344
gRNA1079	Peak37	39	296	26	184	93	273
gRNA21282	Peak879	9	950	64	531	60	885
gRNA30566	Peak1315	0	6	0	0	0	0
gRNA9471	Peak387	33	1178	99	469	58	957
gRNA13197	Peak538	128	847	190	384	276	537
gRNA29128	Peak1232	2	412	6	177	66	341
gRNA1782	Peak69	22	426	41	216	17	403
gRNA6079	Peak257	0	140	0	14	0	63
gRNA20767	Peak862	0	0	0	0	0	0
gRNA16297	Peak670	83	836	43	445	223	622
gRNA6018	Peak253	51	402	46	131	118	209
gRNA18753	Peak767	378	1288	602	433	725	1008
gRNA12937	Peak524	722	4150	704	1971	1270	3507
gRNA18997	Peak777	12	629	372	272	48	561
gRNA23616	Peak964	9	198	14	124	5	161
gRNA22867	Peak933	82	527	37	262	111	424
gRNA22781	Peak929	10	347	14	204	52	211
gRNA17955	Peak743	284	954	323	432	766	633
gRNA27415	Peak1153	96	930	15	352	160	583
gRNA15643	Peak642	14	500	70	271	58	452
gRNA17670	Peak734	0	73	2	61	0	42
gRNA37225	Peak1612	11	395	16	190	44	280
gRNA33664	Peak1450	239	790	277	429	197	555
gRNA3474	Peak149	240	1240	172	663	372	1006
gRNA30098	Peak1287	0	0	0	0	0	0
gRNA23626	Peak964	0	97	0	45	0	23
gRNA35753	Peak1552	4	159	0	61	0	92
gRNA3747	Peak164	2	693	5	267	11	453
gRNA16048	Peak659	0	227	3	106	30	86
gRNA27130	Peak1140	96	246	15	90	110	66
gRNA33522	Peak1445	91	1553	176	639	317	1080
gRNA38975	Peak1682	0	52	0	49	0	89
gRNA1200	Peak43	245	811	256	492	750	628
gRNA1144	Peak39	57	212	5	124	62	234
gRNA18829	Peak771	2	1098	0	622	14	1078
gRNA8185	Peak334	16	179	9	59	64	130
gRNA4813	Peak205	247	2205	125	789	210	1544
gRNA5641	Peak234	0	144	0	94	0	147
gRNA27084	Peak1138	121	1303	211	593	561	913
gRNA18152	Peak748	48	676	70	367	84	522
gRNA19415	Peak804	0	356	1	172	3	349
gRNA20882	Peak865	67	357	13	121	99	219
gRNA14277	Peak583	155	1567	71	697	201	1074
gRNA23660	Peak965	331	3375	325	1418	509	2184
gRNA22460	Peak917	230	516	152	224	540	398
gRNA13180	Peak536	5	71	2	58	7	63
gRNA6029	Peak254	1	193	2	80	17	97
gRNA23918	Peak975	293	2053	388	979	686	1461
gRNA15482	Peak636	85	1352	37	792	217	1494
gRNA13394	Peak546	152	415	88	160	215	184
gRNA9666	Peak400	14	68	0	52	1	122
gRNA4068	Peak177	35	731	43	461	73	500
gRNA6960	Peak287	198	1067	440	489	537	650
gRNA23053	Peak941	111	1954	104	982	153	1513
gRNA10317	Peak429	288	839	239	412	358	567
gRNA30814	Peak1331	19	37	0	11	10	62
gRNA7619	Peak306	2	1	0	1	2	1
gRNA26747	Peak1118	356	424	238	151	878	274
gRNA35659	Peak1548	186	1346	277	544	598	878
gRNA13184	Peak536	288	402	179	199	193	222
gRNA1189	Peak42	621	2893	1263	1416	1143	2093
gRNA15954	Peak654	15	474	8	196	25	352
gRNA30889	Peak1336	4	380	7	161	25	275
gRNA37941	Peak1638	0	27	6	8	0	12
gRNA5896	Peak247	0	123	8	42	0	57
gRNA22580	Peak922	72	457	91	267	109	523
gRNA35153	Peak1531	5	36	0	2	6	14
[truncated: 6,298 more rows]
