# Supplementary material for: Epigenomic profiling of glucocorticoid responses identifies cis-regulatory disruptions impacting steroid resistance in childhood acute lymphoblastic leukemia
Source: Leukemia. Author manuscript; Available in PMC 2022 Oct 4. (PMC9522591; doi:10.1038/s41375-022-01685-z)
Supplement: 1833642_Sup_Tab_5 [file NIHMS1833642-supplement-1833642_Sup_Tab_5.xlsx]

## Sheet: Supplementary Table 5
Supplementary Table 5. Nalm6 sgRNA read counts
sgRNA No.	Peak No.	CTRL1	PRED1	CTRL2	PRED2	CTRL3	PRED3
gRNA31493	Peak1355	1388	18	1732	12	1303	7
gRNA6306	Peak266	13527	104	14303	108	20071	141
gRNA19172	Peak787	3138	44	3352	33	4135	39
gRNA36329	Peak1581	828	61	632	83	1010	7
gRNA25859	Peak1074	1908	7	1898	7	1496	19
gRNA32992	Peak1423	40	0	31	1	138	0
gRNA17695	Peak735	3135	21	3684	30	3164	15
gRNA14249	Peak581	195	1	88	3	134	1
gRNA15973	Peak656	91	0	42	0	2	6
gRNA34367	Peak1486	2249	94315	1659	100435	1966	65203
gRNA39196	Peak1690	245	2	155	0	35	0
gRNA32910	Peak1418	365	4	865	4	539	8
gRNA14601	Peak597	1225	12	869	13	1548	21
gRNA25111	Peak1038	1970	20	1655	26	2354	31
gRNA39197	Peak1690	2504	25	3306	22	3165	23
gRNA7984	Peak324	323	4	815	3	372	3
gRNA14954	Peak615	557	6	172	4	582	7
gRNA35715	Peak1550	245	2	338	1	162	0
gRNA1692	Peak65	1606	13	1893	12	1169	14
gRNA36504	Peak1588	895	1	510	4	809	5
gRNA32266	Peak1387	6536	83	4304	83	8843	83
gRNA2672	Peak110	1066	19	193	4	1123	18
gRNA7694	Peak309	574	3	133	2	451	6
gRNA39625	Peak1715	11409	20100	10894	11585	11721	29795
gRNA16093	Peak662	439	5	721	4	1056	10
gRNA12674	Peak516	3323	22	3476	38	1825	3882
gRNA11828	Peak483	690	3	397	1	312	1
gRNA16859	Peak693	953	3	388	8	670	9
gRNA15442	Peak634	2820	35	2464	28	4240	43
gRNA9766	Peak406	260	1	476	2	41	1
gRNA15104	Peak622	1829	13	2464	20	2137	14
gRNA12454	Peak508	932	6	103	2	516	7
gRNA10189	Peak424	623	46	581	4050	797	12
gRNA29369	Peak1243	396	7	71	5	112	3
gRNA4953	Peak209	2831	708	2092	15	2872	1848
gRNA20293	Peak842	1360	4	696	2	756	12
gRNA36549	Peak1591	612	4	383	1	862	9
gRNA9192	Peak375	1045	9	2248	7	833	607
gRNA36249	Peak1576	4023	33	4598	29	5504	35
gRNA26927	Peak1126	1815	13	1588	16	2163	17
gRNA37477	Peak1619	1158	6	384	3	1112	12
gRNA7968	Peak323	2554	34	4179	26	3388	39
gRNA11310	Peak462	957	18	659	1076	950	15
gRNA22424	Peak915	179	0	44	2	165	0
gRNA23973	Peak978	1746	21	1680	20	1894	3
gRNA5987	Peak251	131	0	28	1	42	1
gRNA24260	Peak997	1271	3	660	4	459	7
gRNA5147	Peak217	480	4	141	2	448	1
gRNA20428	Peak847	1687	35	689	76	1279	19569
gRNA14796	Peak608	2103	21	1071	13	1386	12
gRNA22366	Peak914	1700	10	928	14	1743	15
gRNA11150	Peak457	1056	16	1379	13	875	6
gRNA16694	Peak684	163	0	15	0	60	0
gRNA20214	Peak839	332	6	278	3	652	3
gRNA21848	Peak895	420	4	314	0	283	6
gRNA4184	Peak181	1988	23	1691	30	2696	3036
gRNA13352	Peak543	867	8	276	5	767	14
gRNA466	Peak14	7809	75	6396	61	8513	101
gRNA38027	Peak1645	1390	7	1112	16	1207	16
gRNA14381	Peak587	59	0	1	0	0	1
gRNA14335	Peak586	5434	15986	5328	28544	5143	23522
gRNA36596	Peak1593	334	1	374	3	352	2
gRNA9476	Peak387	2089	19	598	8	1043	6
gRNA23951	Peak977	477	8	91	3	424	6
gRNA39039	Peak1683	657	5	1543	6	112	7
gRNA7449	Peak298	810	4	1434	5	717	5
gRNA39066	Peak1684	4357	658	3013	39	5701	1451
gRNA11201	Peak459	904	3	1381	18	864	7
gRNA19737	Peak818	2821	3204	1723	27	2921	6431
gRNA26536	Peak1107	1916	19	1930	14	3046	15
gRNA34079	Peak1469	1940	38	3388	53	3221	35
gRNA8749	Peak355	466	7	457	2	69	4
gRNA8743	Peak355	668	5	444	10	610	14
gRNA14563	Peak595	566	2	791	1	495	3
gRNA6510	Peak275	284	4	208	4	257	237
gRNA21686	Peak889	2280	13	812	11	2250	15
gRNA5238	Peak221	3356	32	5824	35	4057	4049
gRNA8750	Peak355	584	6	238	8	568	4
gRNA36921	Peak1599	861	2981	231	4510	314	2028
gRNA29930	Peak1275	19	4	18	1	226	0
gRNA19321	Peak795	1993	14	2160	17	1595	22
gRNA7007	Peak288	311	93	332	5	388	6
gRNA14739	Peak604	3866	21	3027	30	1804	34
gRNA32209	Peak1384	1758	16	1800	14	785	14
gRNA27402	Peak1153	784	12	768	9	424	11
gRNA28718	Peak1218	742	6	822	6	567	7
gRNA11473	Peak469	666	6	416	8	703	8
gRNA9444	Peak385	1412	18	1938	8	1416	27
gRNA23357	Peak955	657	12	755	12	611	8
gRNA24014	Peak980	836	7	256	2	714	5
gRNA12623	Peak513	37	0	5	0	55	0
gRNA26942	Peak1126	499	3	462	5	446	5
gRNA7226	Peak292	1227	1931	1607	16471	1493	1479
gRNA16650	Peak682	726	8	848	13	1348	14
gRNA7307	Peak294	1059	5	189	8	1599	9
gRNA6865	Peak283	1772	16	2266	29	1541	49
gRNA7324	Peak294	712	3472	355	11966	560	4783
gRNA8093	Peak330	2259	1598	2921	19	2685	28
gRNA9538	Peak390	778	3	233	10	940	6
gRNA37149	Peak1609	712	3	359	6	1008	3
gRNA27958	Peak1180	322	6	70	0	606	1
gRNA29326	Peak1241	6118	36	6786	56	6597	59
gRNA12685	Peak516	51	0	123	0	13	0
gRNA4202	Peak183	510	5	437	2	401	7
gRNA29012	Peak1228	239	4	246	3	222	1
gRNA463	Peak14	388	1	126	1	167	5
gRNA6077	Peak256	306	12	104	2	248	2
gRNA33176	Peak1431	1018	9	1017	8	488	8
gRNA39217	Peak1691	1238	16	653	8	1222	14
gRNA26104	Peak1091	3441	41	2868	25	2814	25
gRNA39089	Peak1686	419	6	1049	4	785	4
gRNA38986	Peak1682	2067	16	820	22	2661	141
gRNA6697	Peak280	229	1	74	4	508	4
gRNA34771	Peak1513	7351	45	5734	59	9521	58
gRNA10685	Peak440	451	3	527	8	741	1
gRNA37283	Peak1614	368	6	80	5	259	3
gRNA23423	Peak958	4097	1277	2715	49	2684	37
gRNA11157	Peak458	981	5	444	15	676	8
gRNA17617	Peak732	1540	4563	405	1449	2231	22
gRNA11512	Peak470	2165	25	5939	12	2925	28
gRNA20954	Peak867	2162	14	2291	22	2493	14
gRNA10370	Peak431	429	5	467	2	665	3
gRNA18284	Peak752	380	2	1000	5	12	3
gRNA7995	Peak324	1750	15	1457	14	1452	10
gRNA4518	Peak193	333	4	201	12	353	2
gRNA34279	Peak1481	1144	9	452	8	773	15
gRNA2669	Peak110	2868	12	2700	14	1519	11
gRNA23290	Peak950	389	2	75	4	969	5
gRNA28956	Peak1227	1637	14	1597	17	1867	9
gRNA11608	Peak476	109	1	59	2	27	0
gRNA10332	Peak429	389	0	623	0	224	16
gRNA29047	Peak1229	1023	23	897	40	746	38
gRNA34372	Peak1486	1200	10	770	7	850	10
gRNA29856	Peak1270	529	7	802	4	816	2
gRNA2113	Peak85	100	0	44	0	51	0
gRNA17580	Peak731	3721	41	2160	545	3316	30
gRNA15749	Peak645	140	16	52	0	24	0
gRNA12429	Peak507	842	13	889	4	379	3
gRNA18754	Peak768	846	26	240	10	1090	13
gRNA33839	Peak1458	526	3	315	2	863	676
gRNA17733	Peak736	868	5	1339	5	749	6
gRNA7819	Peak315	2727	315	800	33	1613	30
gRNA27510	Peak1157	2876	18471	1889	17831	1798	8158
gRNA33324	Peak1436	1685	14	561	5	1526	11
gRNA32153	Peak1380	725	8	1211	9	868	6
gRNA16310	Peak670	858	4026	735	11	557	14
gRNA30867	Peak1334	826	6	855	4	1484	9
gRNA9350	Peak382	1953	11	1628	17	1968	13
gRNA38521	Peak1666	794	6	941	5	611	6
gRNA37404	Peak1616	552	1	639	4	798	5
gRNA4775	Peak204	43	0	21	0	296	2
gRNA39270	Peak1693	573	3	339	3	182	3
gRNA21651	Peak887	594	4	693	5	763	3
gRNA2948	Peak122	633	3	1085	7	798	6
gRNA30133	Peak1291	3261	20	3065	20	2633	23
gRNA9208	Peak376	3659	17	2123	22	3485	30
gRNA25517	Peak1056	1180	621	1397	8	1538	11
gRNA17883	Peak741	494	6	272	6	641	5
gRNA24082	Peak984	1457	8	2192	15	2797	9
gRNA27717	Peak1168	776	6	415	7	806	8
gRNA29921	Peak1275	3138	56	1173	22	2751	27
gRNA27244	Peak1146	1907	14	989	14	1196	25
gRNA20048	Peak832	1163	40	740	8434	1081	54
gRNA26901	Peak1124	719	10	1154	13	358	13
gRNA19884	Peak825	542	4	187	5	316	4
gRNA35552	Peak1544	3400	317	1780	24	2196	22
gRNA38965	Peak1682	249	3	125	0	190	6
gRNA27982	Peak1182	1523	8	1673	10	1777	9
gRNA9034	Peak369	2018	15	802	15	1303	8
gRNA35065	Peak1527	1023	9	344	8	577	4
gRNA19505	Peak811	306	3	199	1	110	3
gRNA26108	Peak1091	592	4	748	4	629	10
gRNA37552	Peak1623	6305	46	5579	41	6130	509
gRNA12307	Peak502	511	7	281	7	334	13
gRNA17784	Peak738	855	6	995	5	1008	11
gRNA5164	Peak217	1913	20	1664	3	1234	15
gRNA28410	Peak1200	8123	75	7334	70	9155	402
gRNA8726	Peak355	4885	37	4051	37	4153	29
gRNA5174	Peak218	1892	12	2412	10	1214	12
gRNA30093	Peak1287	1041	246	516	922	1483	3357
gRNA37374	Peak1616	531	1	527	1	210	3
gRNA38031	Peak1645	879	2	583	1078	247	5
gRNA14500	Peak591	945	10	627	3	517	11
gRNA32237	Peak1386	1364	9	687	7	1114	7
gRNA28344	Peak1198	2901	18	1715	24	2639	23
gRNA3701	Peak162	1164	11	985	17	1418	11
gRNA4039	Peak177	2800	20	1751	32	1705	15
gRNA28458	Peak1204	2432	13	811	15	1402	16
gRNA22301	Peak912	255	1	306	2	200	4
gRNA37690	Peak1627	843	4	704	3	415	4
gRNA34521	Peak1497	1638	4306	1012	4122	1416	1806
gRNA10727	Peak441	132	2	44	2	121	0
gRNA20592	Peak855	125	1	86	2	283	0
gRNA37332	Peak1615	2359	552	2078	24	2060	30
gRNA27361	Peak1151	5578	45	5324	45	6451	36
gRNA12424	Peak507	312	3	126	9	147	0
gRNA23896	Peak974	2025	15	2428	11	1230	14
gRNA29208	Peak1235	6600	81	7199	78	9250	89
gRNA30456	Peak1309	2112	16	1624	27	1455	13
gRNA31484	Peak1355	1455	9	621	5	978	13
gRNA4036	Peak177	1712	24	593	18	2963	1772
gRNA26836	Peak1122	3614	39	6745	36	4169	50
gRNA25795	Peak1071	233	3	734	1	318	1
gRNA29917	Peak1275	1687	13	1771	11	1906	15
gRNA27750	Peak1170	264	1	310	0	302	1
gRNA9203	Peak376	2103	8933	2677	5513	2273	2307
gRNA34213	Peak1476	4807	37	2308	51	4450	51
gRNA20333	Peak844	1448	9	1153	13	1024	11
gRNA22115	Peak903	1762	22	2698	20	2016	25
gRNA10248	Peak426	522	2	857	3	347	4
gRNA8068	Peak328	978	3	775	5	394	6
gRNA23523	Peak960	87	0	20	0	3	0
gRNA33505	Peak1444	1823	9	1552	7	974	15
gRNA10349	Peak430	448	2	110	293	161	2
gRNA27610	Peak1162	440	6	218	7	430	3
gRNA23074	Peak941	6756	55	4653	58	6745	65
gRNA9459	Peak386	1132	8	791	11	851	2055
gRNA31996	Peak1372	2399	18	2387	18	1343	20
gRNA3875	Peak168	921	6	476	5	454	5
gRNA29173	Peak1234	637	4	753	7	1212	8
gRNA18757	Peak768	6446	56	4205	71	7147	77
gRNA16630	Peak681	1261	13	1323	11	1163	7
gRNA15337	Peak631	1006	18	1146	10	865	11
gRNA39705	Peak1718	1874	15	1008	17	2429	20
gRNA4791	Peak204	2579	19	1235	23	2136	11
gRNA10529	Peak433	205	1	284	1	193	1
gRNA2891	Peak121	877	14	1444	9	1345	16
gRNA8057	Peak327	794	21944	768	30113	611	20845
gRNA18234	Peak751	1191	10	574	3	1190	3
gRNA37428	Peak1617	334	0	227	5	135	2
gRNA34382	Peak1487	2544	40	4740	189	2251	30
gRNA10777	Peak443	530	5	150	5	700	19
gRNA18773	Peak769	114	3	62	0	73	1
gRNA4171	Peak181	7285	73	7923	61	8387	70
gRNA4008	Peak174	3054	29	2436	27	2503	31
gRNA26433	Peak1103	377	5	558	4	695	6
gRNA3812	Peak167	345	0	99	4	370	3
gRNA33312	Peak1435	1221	2882	566	28	1610	17
gRNA20906	Peak866	6755	51	6805	44	6878	54
gRNA1777	Peak69	2099	11	3185	22	1651	19
gRNA13618	Peak555	2145	14	1922	28	3222	15
gRNA3425	Peak145	2109	14	2370	24	2834	25
gRNA16646	Peak682	216	0	18	0	76	0
gRNA25578	Peak1061	1879	7	1522	7	1274	21
gRNA35114	Peak1530	40	0	8	0	2	0
gRNA19224	Peak791	1675	19	2787	19	1975	20
gRNA15295	Peak630	582	19	409	9	858	18
gRNA22952	Peak936	1402	13	1011	13	1676	11
gRNA27433	Peak1154	823	9	340	6	514	6
gRNA38749	Peak1675	1949	15	2098	10	2127	16
gRNA24643	Peak1018	1143	8	507	6	1023	8
gRNA25303	Peak1046	3330	24	2593	31	3636	35
gRNA26150	Peak1094	532	4	1078	6	986	3
gRNA9144	Peak374	194	4	59	4	285	2
gRNA19740	Peak819	2049	2069	2216	17	1637	17
gRNA16118	Peak663	9281	79	4197	79	8522	82
gRNA14352	Peak586	2039	26	1207	21	2880	24
gRNA28902	Peak1226	375	3	583	6	211	9
gRNA28912	Peak1226	544	0	432	1	283	3
gRNA26276	Peak1097	910	9	879	7	916	7
gRNA12738	Peak518	29	2	101	0	66	1
gRNA25440	Peak1053	371	7045	567	2443	373	10962
gRNA16895	Peak695	9789	92	4138	118	8268	75
gRNA21308	Peak880	619	9	508	13	342	4
gRNA37449	Peak1617	2069	14	1965	16	2098	22
gRNA23734	Peak968	1024	10	663	10	841	6
gRNA12358	Peak504	158	2	33	0	308	0
gRNA38072	Peak1646	436	1	1424	2	213	5
gRNA33841	Peak1458	316	2	596	2	156	2
gRNA11419	Peak466	481	5	103	1	465	8
gRNA9756	Peak406	1254	7	1645	10	1034	11
gRNA26545	Peak1108	1409	11	867	7	592	8
gRNA6986	Peak287	6688	46	6047	66	6096	62
gRNA38534	Peak1667	173	0	36	1	157	1
gRNA37984	Peak1639	4684	47	4283	50	5323	54
gRNA19314	Peak795	4137	40	2568	39	2815	52
gRNA25374	Peak1051	19038	171	14999	199	18786	201
gRNA4582	Peak196	313	1	60	6	96	2
gRNA10046	Peak418	7297	52	4949	60	6668	60
gRNA17766	Peak737	409	5	730	4	674	7
gRNA25772	Peak1070	2138	14	601	17	1027	12
gRNA5775	Peak240	226	0	40	10	112	2
gRNA35635	Peak1548	245	18	144	14	337	38
gRNA5231	Peak221	488	10	1112	1	1332	2
gRNA23763	Peak968	604	2	282	7	224	2
gRNA33843	Peak1459	158	1	342	1	268	0
gRNA6795	Peak283	3686	39	3342	45	5528	44
gRNA38968	Peak1682	198	2	57	2	629	2
gRNA19280	Peak794	3420	32	2166	34	3843	29
gRNA16135	Peak663	68	2	231	0	6	1
gRNA30297	Peak1301	3717	3843	3813	1061	3654	528
gRNA23363	Peak955	528	1	80	1	652	7
gRNA27603	Peak1161	1157	11	2147	15	678	8
gRNA14159	Peak576	535	2	515	3	205	1
gRNA28509	Peak1206	414	2	585	2	181	4
gRNA32909	Peak1418	1607	11	2342	18	1200	11
gRNA14379	Peak587	439	2	379	10	715	2
gRNA9287	Peak380	817	7	530	2	572	5
gRNA3014	Peak125	654	3	931	5	125	3
gRNA37707	Peak1627	356	8	1180	1	464	2
gRNA19169	Peak787	93	0	18	4	38	1
gRNA37003	Peak1603	899	4	284	2	298	9
gRNA6157	Peak260	1610	4	1774	8	1294	9
gRNA20098	Peak834	399	2	126	3	509	7
gRNA27766	Peak1171	370	5	676	1	514	2
gRNA23121	Peak942	270	2	320	0	234	921
gRNA26944	Peak1126	331	2	55	1	336	2
gRNA9997	Peak417	1987	74042	1355	86665	1661	90708
gRNA22419	Peak915	402	4	275	804	384	1
gRNA7468	Peak300	2867	46873	2823	24684	1762	42367
gRNA20271	Peak842	153	1	601	0	116	3
gRNA15334	Peak631	1226	10	863	6	1236	5
gRNA31877	Peak1368	1948	6	1909	13	1350	19
gRNA22782	Peak929	708	4	1498	6	825	3
gRNA7678	Peak308	590	1	148	6	549	10
gRNA26626	Peak1111	366	4	662	3	544	6
gRNA7198	Peak290	331	0	872	6	579	2
gRNA11219	Peak460	5727	43	4751	39	7878	43
gRNA4829	Peak205	5565	27597	3246	33196	5600	39480
gRNA15936	Peak653	9155	3131	5054	3561	7096	6301
gRNA31232	Peak1348	3181	131858	2605	118187	3388	89345
gRNA19139	Peak786	1219	11	978	13	1738	10
gRNA32327	Peak1391	443	2	775	0	394	9
gRNA34760	Peak1512	2027	20	1010	17	2980	17
gRNA29796	Peak1266	929	10	459	4	1290	8
gRNA20595	Peak855	238	6	828	8	14	13
gRNA9739	Peak405	295	0	311	2	92	3
gRNA30610	Peak1319	587	7	312	2	459	1
gRNA12209	Peak497	1069	12	2004	15	1155	4
gRNA2906	Peak121	24	1	322	0	22	0
gRNA5339	Peak225	373	3	705	3	119	4
gRNA39351	Peak1698	1240	14	922	4	2067	10
gRNA28452	Peak1203	496	30	244	26	383	16
gRNA5567	Peak232	605	4	49	8	530	6
gRNA21926	Peak897	163	0	70	0	16	3
gRNA24328	Peak1001	11	0	21	0	0	0
gRNA30003	Peak1281	2810	26	1859	24	2258	14
gRNA11542	Peak472	87	0	104	0	7	1
gRNA13684	Peak557	119	0	14	0	228	2
gRNA33619	Peak1449	1083	15	4224	17	1204	12
gRNA15177	Peak625	1362	12	776	17	1639	31
gRNA17300	Peak717	319	8	777	5	242	2
gRNA32882	Peak1418	322	3	79	9	154	2
gRNA18277	Peak752	232	3	851	5	119	1
gRNA24441	Peak1007	329	1	123	1	421	3
gRNA9254	Peak377	309	125	112	85	210	93
gRNA35302	Peak1535	7215	48	9106	69	11522	73
gRNA32332	Peak1392	1308	12	1556	7	1434	6
gRNA25274	Peak1045	1964	41	1010	19	1806	23
gRNA24155	Peak989	1798	1504	1133	2533	1364	424
gRNA19720	Peak818	1321	10	1132	8	736	17
gRNA15308	Peak631	262	8	430	3	209	3
gRNA17543	Peak729	8350	54	5454	49	8216	77
gRNA12312	Peak502	482	16	498	4	298	1
gRNA6017	Peak253	169	1	122	2	263	1
gRNA18160	Peak748	261	2	65	2	155	1
gRNA27723	Peak1169	277	9	95	3	536	5
gRNA25533	Peak1058	176	2	44	0	11	1
gRNA22712	Peak926	1929	17	954	21	1486	15
gRNA39101	Peak1686	377	2	442	6	448	2
gRNA6255	Peak264	1632	12	2296	28	2133	11
gRNA18340	Peak754	907	7	849	12	1035	11
gRNA9691	Peak402	755	6	1280	10	416	8
gRNA27347	Peak1150	367	4	141	4	394	9
gRNA11132	Peak457	1634	10	779	15	2216	13
gRNA31465	Peak1354	2976	15	1121	15	2646	29
gRNA3826	Peak167	898	48	387	6	1471	7
gRNA37004	Peak1603	335	3	75	2	562	1
gRNA4220	Peak183	485	5	1101	4	836	9
gRNA33216	Peak1432	2121	9	2583	9	1394	23
gRNA10397	Peak431	2559	26	1864	24	1683	32
gRNA28645	Peak1214	3078	25	1506	33	4005	23
gRNA31576	Peak1358	722	7	446	4	674	3
gRNA23874	Peak973	609	5	532	9	827	6
gRNA24517	Peak1010	1924	11	1131	14	1465	7
gRNA25467	Peak1054	2707	17	1028	12	1682	12
gRNA159	Peak6	2946	41	1709	748	2090	34
gRNA4350	Peak186	3075	16	2537	22	2055	21
gRNA17224	Peak711	2227	9	998	20	1002	10
gRNA31396	Peak1353	1058	44	696	23	1208	24
gRNA6567	Peak277	97	7	44	8	159	1
gRNA6570	Peak277	319	6	1060	0	445	5
gRNA8760	Peak356	261	743	534	1569	572	737
gRNA11884	Peak484	173	1	87	1	1	0
gRNA24166	Peak990	1273	8	1063	12	1595	6
gRNA19068	Peak781	1855	14	1025	10	1719	12
gRNA8732	Peak355	319	1	222	4	716	4
gRNA11613	Peak476	2405	23	4953	23	3074	25
gRNA3559	Peak155	1580	15	719	9	1305	18
gRNA17255	Peak714	6942	2069	3709	46	4147	49
gRNA4292	Peak184	333	3	62	0	290	0
gRNA33637	Peak1449	1449	12	1076	556	1420	7
gRNA35712	Peak1550	426	2532	76	6	352	4
gRNA29667	Peak1261	57	1	216	0	130	1
gRNA24663	Peak1019	9973	113	14605	96	16493	134
gRNA31149	Peak1344	1185	20	2747	4	1695	10
gRNA6968	Peak287	2789	28	2154	30	1934	27
gRNA18372	Peak756	22	1	319	0	234	1
gRNA18441	Peak757	992	3	1217	9	467	4
gRNA19895	Peak825	838	7	564	4	736	12
gRNA20199	Peak839	233	1	276	1	68	1
gRNA6382	Peak269	776	4	328	2	896	3
gRNA8437	Peak346	393	3	583	4	361	6
gRNA30290	Peak1301	301	3	517	2	363	6
gRNA19329	Peak796	409	9	386	265	172	7
gRNA34173	Peak1475	75	1	130	2	28	0
gRNA28343	Peak1198	30	0	13	0	11	0
gRNA26510	Peak1106	2075	16	1625	14	1590	15
gRNA4445	Peak189	869	2	398	7	991	2
gRNA26311	Peak1097	514	6	935	2	972	2
gRNA12200	Peak496	81	0	16	0	3	1
gRNA1748	Peak68	477	6	732	2	301	5
gRNA18299	Peak752	1612	13	1469	20	1077	11
gRNA14774	Peak606	888	6598	596	2220	546	3868
gRNA19366	Peak798	519	13	894	9	780	10
gRNA11583	Peak474	440	3	273	6	192	3
gRNA9275	Peak379	545	5	776	5	611	10
gRNA20650	Peak857	284	2	359	2	245	1
gRNA4827	Peak205	591	3	375	2	284	3
gRNA9233	Peak377	910	5	473	7	1334	5
gRNA18610	Peak761	212	2	673	2	247	1
gRNA33455	Peak1442	297	2	83	2	410	1
gRNA27831	Peak1174	181	1	46	0	259	8
gRNA32677	Peak1410	549	2	451	0	401	4
gRNA37804	Peak1630	648	5	247	4	601	1
gRNA21190	Peak876	187	0	230	1	35	1
gRNA33860	Peak1460	619	5	537	4	245	10
gRNA6700	Peak280	768	9	1471	8	596	5
gRNA39621	Peak1715	1601	14	1045	6	1537	13
gRNA24419	Peak1007	1043	6	1115	17	382	43
gRNA30909	Peak1337	77	0	23	2	200	0
gRNA23160	Peak946	323	0	47	0	353	2
gRNA25130	Peak1039	3540	693	3121	22	4085	28
gRNA11426	Peak466	77	0	24	0	2	0
gRNA1868	Peak71	546	5	700	1	601	5
gRNA39274	Peak1693	226	0	30	2	33	0
gRNA12166	Peak495	1351	8	925	15	1604	16
gRNA6607	Peak278	673	3	204	6	379	3
gRNA38171	Peak1651	4331	38	3277	41	3794	44
gRNA24049	Peak983	656	7	85	3521	195	0
gRNA31958	Peak1371	1620	9	1072	18	1547	9
gRNA19000	Peak777	1319	5	995	3	1563	23
gRNA8145	Peak332	8827	113	4330	107	5439	115
gRNA6993	Peak287	1059	8	700	2	687	9
gRNA18238	Peak751	601	5	426	1	1162	5
gRNA26106	Peak1091	193	2	495	4	195	1
gRNA33415	Peak1440	371	3	173	8	396	10
gRNA27590	Peak1160	1261	9	910	10	1398	15
gRNA11912	Peak485	735	3	676	3	856	4
gRNA8378	Peak344	600	6	548	2	467	1
gRNA16304	Peak670	368	6	156	13	178	2
gRNA19832	Peak823	500	0	275	1	403	4
gRNA14855	Peak609	352	2	583	2	561	1
gRNA650	Peak19	4202	29	4860	41	4513	24
gRNA5611	Peak234	104	4406	76	3311	35	4866
gRNA21222	Peak878	692	1	701	5	987	7
gRNA25461	Peak1054	689	4	364	5	919	4
gRNA17684	Peak734	1971	23	1688	15	1960	13
gRNA414	Peak13	896	17	1810	18	831	19
gRNA20729	Peak860	2556	32	2639	1995	2231	25
gRNA30170	Peak1293	650	2	524	5	445	9
gRNA3667	Peak161	500	7	536	242	249	9
gRNA16041	Peak658	1599	8	1228	10	1624	12
gRNA20612	Peak856	3264	44	5402	44	4317	42
gRNA8975	Peak365	2139	21	759	10	2651	18
gRNA36286	Peak1579	708	3	571	6	559	1
gRNA19230	Peak791	424	1	107	2	417	0
gRNA14290	Peak583	2206	8	566	12	2454	13
gRNA31201	Peak1346	5544	44272	4390	41228	4586	23253
gRNA4934	Peak209	1251	26	1558	14	1511	13
gRNA29189	Peak1234	574	6	478	6	511	7
gRNA2945	Peak122	1735	10	2030	16	1741	12
gRNA644	Peak19	439	1	305	3	1033	6
gRNA29899	Peak1273	1014	9	908	528	1216	14
gRNA19852	Peak824	857	5	542	5	1194	10
gRNA25703	Peak1067	0	0	0	0	0	0
gRNA25564	Peak1060	418	5	404	2	268	11
gRNA32278	Peak1390	1301	9	1443	14	1435	20
gRNA39811	Peak1722	490	1	290	2	164	3
gRNA7698	Peak309	1909	17	2411	12	2596	13
gRNA32771	Peak1415	553	3	1163	3	794	12
gRNA9234	Peak377	834	7	331	2	420	2
gRNA4457	Peak190	494	3	437	1	282	2
gRNA5985	Peak251	97	0	143	0	7	1
gRNA35193	Peak1533	768	7	1084	6	941	11
gRNA11887	Peak485	2905	18	1204	18	3034	18
gRNA14936	Peak614	392	6	248	15	313	1
gRNA19245	Peak792	254	23	108	2	81	5
gRNA36240	Peak1576	1637	10	1473	10	1374	17
gRNA1750	Peak68	1262	8	1435	178	871	10
gRNA20911	Peak866	6137	53	4110	44	5543	60
gRNA18301	Peak752	350	2	37	0	515	4
gRNA33293	Peak1435	11656	63	10054	103	9183	637
gRNA16447	Peak675	199	0	35	5	108	1
gRNA596	Peak18	1089	7	1614	11	872	10
gRNA10079	Peak420	1688	13	1636	12	1770	9
gRNA10351	Peak430	886	5	1256	6	677	10
gRNA7966	Peak323	164	1	73	0	1	1
gRNA3540	Peak153	244	3	86	5	151	1
gRNA38995	Peak1682	943	8	609	3	592	6
gRNA5387	Peak226	3391	1820	5673	28	3024	73
gRNA30879	Peak1335	632	2	1252	4	557	2
gRNA12155	Peak495	2880	24	2019	23	1881	24
gRNA9570	Peak394	1254	9	981	14	1628	9
gRNA23724	Peak967	22041	14410	16237	215	25101	204
gRNA16128	Peak663	468	2	368	7	1148	4
gRNA30110	Peak1289	543	1	414	0	472	8
gRNA2900	Peak121	9290	1999	7641	67	8438	95
gRNA9633	Peak398	840	5	1061	7	937	19
gRNA37340	Peak1615	1262	7	572	3	1578	9
gRNA37799	Peak1630	375	6	603	12	684	4
gRNA29574	Peak1254	1356	9	1787	5	1053	10
gRNA5011	Peak211	3864	42	4421	33	4313	34
gRNA34430	Peak1488	3998	527	3817	30	3588	48
gRNA5022	Peak211	801	11	356	4	764	12
gRNA20713	Peak859	9002	1438	6985	586	9819	84
gRNA24847	Peak1027	236	2	726	1	215	1
gRNA29470	Peak1248	1853	13	1355	9	2403	11
gRNA8247	Peak338	488	7	501	1	462	5
gRNA27375	Peak1152	1173	15	1099	9	693	1
gRNA18965	Peak777	1026	7	442	4	632	3
gRNA16568	Peak680	1832	9	1017	17	1460	15
gRNA24338	Peak1001	231	1	93	0	249	0
gRNA2680	Peak110	575	11	433	2	655	5
gRNA26083	Peak1090	5633	47	3107	42	5928	38
gRNA27267	Peak1147	361	3	1223	0	577	3
gRNA16578	Peak681	900	5	1410	8	1004	8
gRNA6737	Peak281	7002	52	6719	55	6555	54
gRNA35619	Peak1548	3619	19	3991	24	2919	22
gRNA34570	Peak1499	824	8	1144	11	778	67
gRNA26489	Peak1105	590	3	478	8	172	1
gRNA1416	Peak53	421	3	1298	11	374	2
gRNA38888	Peak1680	665	5	447	0	352	9
gRNA39435	Peak1704	1040	20	550	10	836	8
gRNA39497	Peak1707	1174	7	910	10	1536	10
gRNA23395	Peak956	1854	18	2784	9	1966	11
gRNA20238	Peak841	209	0	52	0	130	2
gRNA9879	Peak410	1619	12	1014	13	2113	11
gRNA31132	Peak1344	436	1	101	3	408	7
gRNA3326	Peak140	629	4	579	5	398	8
gRNA8503	Peak349	1757	9	1505	1160	1852	16
gRNA2022	Peak80	85	1	57	0	106	1
gRNA14239	Peak580	856	9	656	12	1548	19
gRNA12038	Peak489	880	3	557	5	848	4
gRNA32222	Peak1385	2138	15	848	14	914	20
gRNA14230	Peak580	1379	12	2257	7	1119	13
gRNA442	Peak13	1725	21	1222	19	985	26
gRNA82	Peak3	6109	46	2375	38	7326	43
gRNA23295	Peak950	1391	18	2571	20	2372	1702
gRNA19407	Peak804	1035	5	532	12	686	13
gRNA30707	Peak1324	984	5	885	9	979	5
gRNA599	Peak18	981	2	331	3	475	6
gRNA21093	Peak874	657	10	1729	13	1057	17
gRNA28468	Peak1204	172	1	62	0	10	0
gRNA21217	Peak877	1446	14	747	11	1104	11
gRNA2863	Peak119	889	6	1847	8	688	11
gRNA6402	Peak270	3795	29	1880	3008	3213	24
gRNA28288	Peak1195	1651	11	879	8	1219	17
gRNA3383	Peak143	876	8	902	6	537	5
gRNA13797	Peak562	729	9	219	7	896	3
gRNA39049	Peak1684	812	5	389	8	879	5
gRNA22540	Peak921	5009	6453	3064	2679	4446	39
gRNA23003	Peak938	575	5	147	7	336	6
gRNA25290	Peak1045	342	3	208	0	317	4
gRNA2745	Peak113	1385	9	1108	7	997	33
gRNA32312	Peak1391	635	9	664	3	816	4
gRNA35722	Peak1551	6303	65	6965	1051	5705	2372
gRNA38348	Peak1661	3201	30	4777	37	3879	33
gRNA3655	Peak160	2332	25	3922	24	2323	20
gRNA21918	Peak897	912	14	1440	31	1345	11
gRNA39789	Peak1721	2647	15	3200	23	2555	28
gRNA27734	Peak1169	765	2	679	19	231	10
gRNA37193	Peak1611	161	4	44	1	155	2
gRNA7695	Peak309	199	2	65	0	123	0
gRNA8711	Peak354	3536	19	3547	16	2418	27
gRNA13104	Peak532	600	7	342	3	764	3
gRNA2661	Peak109	6303	59	3932	64	6343	55
gRNA8616	Peak352	5427	664	5348	53	5879	49
gRNA7761	Peak311	3636	37	3785	39	4028	40
gRNA8053	Peak327	3460	20	2991	37	2644	23
gRNA7646	Peak308	651	6	1279	4	493	5
gRNA15822	Peak649	557	3	229	3	825	8
gRNA30298	Peak1302	1083	9	633	1	897	4
gRNA13269	Peak541	232	5	510	0	177	2
gRNA38340	Peak1661	743	14	1247	8	947	14
gRNA30039	Peak1283	756	3	546	3	1505	7
gRNA26515	Peak1106	1156	4	705	10	1061	13
gRNA23956	Peak977	672	4	157	1	461	4
gRNA20717	Peak859	527	8	213	8	496	5
gRNA28032	Peak1184	1005	7	948	8	593	9
gRNA30635	Peak1319	2275	10	1037	13	1157	21
gRNA27780	Peak1173	2976	879	3518	34	3679	1202
gRNA8985	Peak366	1244	7	839	13	2042	10
gRNA22696	Peak925	514	1	337	4	408	8
gRNA5667	Peak235	445	2	265	4	260	3
gRNA30094	Peak1287	2069	216	2253	80	2580	138
gRNA11175	Peak458	796	4	515	4	451	3
gRNA27330	Peak1150	179	5	66	1317	210	3
gRNA39105	Peak1686	163	4	233	6	305	3
gRNA26173	Peak1095	907	2	824	10	678	6
gRNA34440	Peak1490	1785	14	873	19	2079	17
gRNA39155	Peak1688	56805	286	28959	330	50508	350
gRNA15026	Peak618	1159	16	2657	12	819	8
gRNA21702	Peak891	5770	45	5280	50	4313	36
gRNA22158	Peak904	1165	8	747	11	1047	14
gRNA4656	Peak199	4074	42	3805	1768	4017	30
gRNA36721	Peak1597	3	0	5	0	44	0
gRNA5331	Peak225	114	0	18	0	1	0
gRNA21559	Peak884	88	0	32	0	123	0
gRNA34439	Peak1490	9781	92	7332	87	10989	76
gRNA17246	Peak713	259	4	120	0	125	1
gRNA12492	Peak509	1311	1953	1276	17	1510	9
gRNA3303	Peak139	1096	13	1383	10	1506	6
gRNA1696	Peak66	5045	31	2841	43	4356	34
gRNA15238	Peak627	411	10	102	4	225	1
gRNA29598	Peak1256	65	0	42	0	90	1
gRNA29826	Peak1268	1876	21	2245	14	1905	10
gRNA32526	Peak1402	431	2	536	4	733	2
gRNA10628	Peak438	7991	58	5626	63	6933	56
gRNA35925	Peak1561	5281	34	3345	46	5158	52
gRNA35562	Peak1545	449	5	441	3	428	7
gRNA2	Peak1	1423	6	1253	9	1620	13
gRNA11457	Peak468	524	9	1257	6	579	3
gRNA19886	Peak825	24	1	24	1	19	0
gRNA31104	Peak1343	1210	3	992	12	727	8
gRNA2795	Peak116	2647	26	2490	23	3798	16
gRNA35132	Peak1530	513	4	419	1	110	6
gRNA1604	Peak61	1896	17	1017	17	1694	13
gRNA32572	Peak1405	2765	15	2241	17	2059	23
gRNA5033	Peak212	962	18	1134	12	1185	14
gRNA5322	Peak225	2648	17	1569	12	3633	885
gRNA29155	Peak1233	1525	12	1189	7	1934	46
gRNA18017	Peak744	442	3	89	5	97	2
gRNA25153	Peak1039	4291	1720	4891	2715	4398	35
gRNA7207	Peak290	1566	10	2441	14	1646	9
gRNA31951	Peak1370	3095	25	2749	29	3636	26
gRNA375	Peak12	2024	28	354	9	834	5
gRNA15586	Peak639	1426	7	695	8	666	12
gRNA11146	Peak457	2653	13	944	614	1916	21
gRNA5258	Peak221	2849	23	1613	19	1994	26
gRNA28636	Peak1214	3170	22	2502	22	2349	12
gRNA38957	Peak1682	1624	11	1847	9	1004	8
gRNA4175	Peak181	284	2	251	6	464	593
gRNA26934	Peak1126	489	3370	128	1678	278	16039
gRNA10499	Peak432	436	0	134	2	354	1
gRNA26579	Peak1109	2302	9	1899	15	1201	16
gRNA31968	Peak1371	850	4	130	3	318	0
gRNA7667	Peak308	2479	26	1351	22	2713	32
gRNA29070	Peak1230	1231	6	1805	11	786	10
gRNA39809	Peak1722	1697	9	1511	13	1847	10
gRNA32095	Peak1374	1543	16	1038	19	1122	11
gRNA19458	Peak807	2079	13	1824	23	3270	29
gRNA9379	Peak384	170	2	25	2	240	1
gRNA30021	Peak1282	853	6	617	8	856	12
gRNA28301	Peak1196	5647	54	3075	64	5833	41
gRNA18647	Peak763	424	2	365	3	166	3
gRNA10524	Peak433	838	3	370	7	1005	5
gRNA32230	Peak1385	573	2	999	3	563	5
gRNA602	Peak18	5976	49	6455	52	6563	54
gRNA35210	Peak1533	142	0	61	2	47	0
gRNA36503	Peak1588	158	4	50	1	111	2
gRNA31928	Peak1370	12478	119	9442	108	8051	130
gRNA23880	Peak973	4840	53	4135	76	6752	49
gRNA11741	Peak480	550	10	595	3	303	9
gRNA6246	Peak264	64	0	13	0	8	1
gRNA33554	Peak1447	1583	21	2871	15	1972	17
gRNA38800	Peak1677	1249	10	1270	637	1199	9
gRNA8977	Peak365	1319	14	2294	22	1290	20
gRNA30211	Peak1297	662	3	334	2	250	0
gRNA37951	Peak1638	766	53	382	6	401	3
gRNA26253	Peak1097	39	2	22	3	28	7
gRNA4611	Peak197	883	5	875	12	398	5
gRNA36734	Peak1597	543	5	1011	5	410	3
gRNA5831	Peak243	352	1	240	3	419	2
gRNA5621	Peak234	195177	2933	222254	3143	362533	3389
gRNA28522	Peak1207	3901	19	2998	18	2306	27
gRNA15827	Peak649	279	1	66	0	108	2
gRNA32679	Peak1410	1463	16	1730	8	652	7
gRNA35226	Peak1533	2322	73	2488	18	5579	53
gRNA22340	Peak913	2269	17	1322	15	2160	17
gRNA13517	Peak550	5098	41	4531	56	6352	39
gRNA20025	Peak831	43	1	11	1	1	1
gRNA27247	Peak1146	313	3	378	2	373	3
gRNA15844	Peak649	171	0	62	1	146	0
gRNA6465	Peak272	164	339	39	2	213	1
gRNA16972	Peak699	274	2	126	0	465	0
gRNA26582	Peak1109	216	2	59	4	157	0
gRNA25259	Peak1044	1602	13	1111	9	1344	15
gRNA5541	Peak231	2187	65	912	50	1570	41
gRNA31982	Peak1371	77	1	19	0	168	0
gRNA35083	Peak1528	334	0	23	1	3	0
gRNA37696	Peak1627	580	7	403	1	645	3
gRNA511	Peak15	5385	48	4715	41	5708	42
gRNA22386	Peak914	637	5	918	4	474	0
gRNA18503	Peak758	562	8	524	7	703	3
gRNA20300	Peak842	621	5483	333	43	654	10366
gRNA29051	Peak1229	1752	14	1130	17	1650	7
gRNA33359	Peak1438	931	6	407	9	1022	9
gRNA24363	Peak1004	226	1	41	4	181	0
gRNA34781	Peak1514	4918	26	4703	54	5122	55
gRNA23373	Peak955	944	11	1555	6	796	11
gRNA5495	Peak230	8815	92	9371	71	11387	102
gRNA30140	Peak1291	1731	21	1116	27	1708	30
gRNA21548	Peak884	2846	20	1432	20	3673	19
gRNA3697	Peak162	3067	26	1255	1738	1547	32
gRNA16660	Peak683	3919	26	2874	36	3047	28
gRNA37027	Peak1604	186	0	136	1	0	2
gRNA28998	Peak1228	5431	44	3038	3064	3613	35
gRNA9460	Peak386	2461	2140	1741	29	2045	3818
gRNA27065	Peak1136	4524	41	4601	42	3433	27
gRNA8032	Peak327	2585	14	2594	12	2184	14
gRNA15182	Peak625	971	6	207	2	563	6
gRNA39618	Peak1715	335	3	591	5	258	2
gRNA3896	Peak169	356	2	45	2	119	2
gRNA33210	Peak1432	1093	9	1141	2014	511	8
gRNA3246	Peak137	757	6	244	20	602	3
gRNA3240	Peak137	2449	29	2901	6262	3033	32
gRNA4142	Peak180	230	4	21	0	63	4
gRNA36524	Peak1590	31311	2923	19474	314	26407	355
gRNA14755	Peak605	1173	16	1754	12	1502	12
gRNA30385	Peak1306	2085	19	1316	12	1230	7
gRNA34245	Peak1478	7662	88	8207	69	8686	80
gRNA6984	Peak287	127	0	37	5	186	0
gRNA3494	Peak149	5789	72	6388	68	8085	2014
gRNA38470	Peak1665	1352	12653	576	8464	955	2924
gRNA23729	Peak967	698	8	240	1	582	6
gRNA37420	Peak1617	117	3	72	1	57	2
gRNA29484	Peak1248	175	3	488	1	382	5
gRNA33513	Peak1444	0	0	9	0	170	1
gRNA35890	Peak1560	1525	14	1137	12	1651	16
gRNA885	Peak27	1446	4	1152	10	940	14
gRNA4897	Peak208	2898	18	2003	27	2200	28
gRNA22776	Peak928	5713	41	3611	33	6200	44
gRNA23192	Peak947	2641	18	3028	27	2117	43
gRNA34409	Peak1488	322	1	293	4	94	2
gRNA14283	Peak583	1789	12	913	13	1080	11
gRNA34797	Peak1516	2128	20	805	13	1105	50
gRNA36284	Peak1579	455	3	158	1	740	3
gRNA24133	Peak987	758	2	1971	10	497	8
gRNA70	Peak3	2299	20	1717	14	1334	13
gRNA8966	Peak365	1044	5	1034	8	1129	5
gRNA21035	Peak871	411	2	52	4	250	4
gRNA36298	Peak1581	74	1	136	1	0	0
gRNA15619	Peak641	76	0	23	0	66	6
gRNA6956	Peak287	496	12	391	3	854	9
gRNA28403	Peak1200	781	11	1060	9	393	6
gRNA31496	Peak1355	504	5	452	4	857	1
gRNA709	Peak21	1859	13	665	20	1134	26
gRNA17553	Peak729	545	5	95	8	346	3
gRNA37558	Peak1623	494	9	136	3	356	1
gRNA29400	Peak1244	225	3	711	2	149	1
gRNA30654	Peak1320	4426	30	3557	25	3478	29
gRNA20227	Peak840	1388	10	1614	9	1849	7
gRNA7628	Peak307	643	4	559	3	783	6
gRNA9400	Peak384	2736	39	3544	27	3259	23
gRNA11423	Peak466	75	1	6	0	0	1
gRNA3390	Peak143	818	4	669	0	321	5
gRNA22107	Peak903	142	0	46	3	86	0
gRNA365	Peak11	1057	7	180	10	1044	9
gRNA37582	Peak1624	434	0	214	1	302	2
gRNA38848	Peak1679	883	14	981	11	694	7
gRNA18652	Peak763	3189	55	3685	60	2837	48
gRNA6126	Peak259	196	1	375	1	8	7
gRNA8973	Peak365	3203	18	5931	27	5159	22
gRNA31707	Peak1363	2125	7657	2118	13326	1695	4789
gRNA513	Peak15	1865	92	1311	31	1469	11
gRNA24323	Peak1001	545	7	920	7	260	3
gRNA36309	Peak1581	1552	5473	1245	27	1223	12
gRNA26499	Peak1106	8089	83	6643	65	7783	70
gRNA29373	Peak1243	7913	80	7030	60	5672	79
gRNA12686	Peak516	1107	1107	205	8	609	5
gRNA27034	Peak1133	2662	26	2798	17	3581	32
gRNA29699	Peak1263	1772	14	1858	11	1847	6
gRNA9042	Peak369	2228	14	1000	1105	1767	21
gRNA32252	Peak1387	174	1	72	2	220	0
gRNA8702	Peak354	1557	22	1085	28	1593	27
gRNA20268	Peak841	3440	28	4819	628	2661	24
gRNA34251	Peak1479	1248	4	629	17	1262	11
gRNA6486	Peak273	64	0	30	0	22	0
gRNA21769	Peak894	6254	55	3821	68	7955	76
gRNA2644	Peak108	1579	12	1288	18	2264	9
gRNA26180	Peak1096	1003	6	616	2	515	3
gRNA16236	Peak668	110	0	20	0	87	0
gRNA17918	Peak742	1369	5	646	8	1224	10
gRNA26458	Peak1104	4200	32	5437	48	4263	27
gRNA6315	Peak267	348	1	293	1	327	4
gRNA17666	Peak734	4946	33	6359	43	6146	47
gRNA7057	Peak288	4402	49	3904	38	3766	38
gRNA7385	Peak295	1127	7	1395	5	1285	11
gRNA10649	Peak439	2177	1340	3094	16	1857	102
gRNA18080	Peak745	428	2	2704	4	478	8
gRNA18048	Peak744	210	0	58	0	44	0
gRNA7269	Peak292	964	18	877	10	964	8
gRNA7571	Peak304	1142	14	698	19	1118	7
gRNA11803	Peak482	38	0	25	0	0	0
gRNA20913	Peak866	1769	15	2140	11	1747	20
gRNA36245	Peak1576	1076	9	1190	6	933	4
gRNA14484	Peak589	405	1	232	1	272	3
gRNA538	Peak16	9014	105	7016	138	10333	133
gRNA15540	Peak637	181	2	218	1	223	0
gRNA11366	Peak464	530	5	672	4	695	7
gRNA19517	Peak811	460	4855	201	4797	323	8182
gRNA29285	Peak1239	568	7	467	4	456	3
gRNA37499	Peak1620	2212	21	1314	23	2461	22
gRNA12595	Peak512	876	8	448	6	437	7
gRNA11168	Peak458	407	6	624	1927	69	3
gRNA4819	Peak205	381	1	225	4	199	2
gRNA5961	Peak249	28	0	97	3	263	0
gRNA26879	Peak1124	702	11	1354	2074	294	12
gRNA6821	Peak283	476	3	474	3	682	2
gRNA5375	Peak226	1174	16	1107	18	1593	6
gRNA6160	Peak261	2605	14	1005	17	2041	26
gRNA18070	Peak745	967	8	699	12	1113	9
gRNA26513	Peak1106	165	1	42	1	96	0
gRNA37685	Peak1626	356	6	316	5	168	3
gRNA16852	Peak693	13845	117	13828	106	14123	119
gRNA36851	Peak1598	209	0	103	2	239	1
gRNA37480	Peak1619	765	9	756	13	739	3629
gRNA11477	Peak469	3974	239	3339	84	3651	71
gRNA200	Peak8	1652	18	888	16	2120	17
gRNA1705	Peak66	728	10	1250	7	813	2
gRNA28730	Peak1218	193	0	182	2	151	0
gRNA23109	Peak942	4268	42	5755	42	4622	48
gRNA6107	Peak258	3416	37	2249	31	3385	36
gRNA30074	Peak1284	281	2	539	5	234	1
gRNA26636	Peak1112	139	0	104	0	101	0
gRNA19925	Peak826	602	5	1447	6	793	2
gRNA16475	Peak676	1195	3	823	10	601	13
gRNA6481	Peak273	1170	9	756	3259	1099	11
gRNA31668	Peak1362	829	7	673	5	793	2
gRNA34899	Peak1521	331	3	775	2	690	0
gRNA26506	Peak1106	806	4	384	7	1133	2
gRNA37722	Peak1627	3737	36	3651	44	3724	38
gRNA4561	Peak195	43	4	85	1	39	0
gRNA34358	Peak1485	148	2	60	0	134	0
gRNA24503	Peak1010	277	1	264	2	203	0
gRNA31152	Peak1344	477	1	43	4	22	3
gRNA25311	Peak1046	1249	22	1357	17	877	27
gRNA95	Peak3	3187	17	2650	14	2660	21
gRNA2876	Peak120	3018	17	1560	22	1969	13
gRNA39026	Peak1683	481	4	104	6	512	1
gRNA37020	Peak1604	279	0	265	1	288	1
gRNA20229	Peak840	26	0	0	1	0	0
gRNA2481	Peak101	3447	33096	2567	21876	2649	17024
gRNA32500	Peak1401	1454	13	2316	14	945	7
gRNA15727	Peak645	2566	28	3903	43	6791	1157
gRNA20974	Peak867	4106	31	4024	37	4285	56
gRNA2684	Peak110	1458	4	1375	10	965	10
gRNA31181	Peak1345	2748	17	1930	31	1379	24
gRNA24344	Peak1002	465	335	168	4	955	4
gRNA6225	Peak263	2098	15	1583	10	1081	25
gRNA15121	Peak624	705	4	611	11	707	12
gRNA9742	Peak405	5299	34	5161	46	7693	46
gRNA14124	Peak575	1861	35	4600	66	3709	59
gRNA10017	Peak418	5964	34	3306	52	4749	43
gRNA31751	Peak1364	441	6	318	4	297	4
gRNA19579	Peak814	3680	3550	4587	1096	6753	406
gRNA29469	Peak1248	427	6	94	0	218	7
gRNA6634	Peak279	222	0	9	0	61	1
gRNA36603	Peak1593	2186	18	2219	14	1858	17
gRNA23266	Peak950	109	2	1180	1	190	0
gRNA36902	Peak1598	70	0	160	3	143	2
gRNA6816	Peak283	2104	7	1767	10	1194	11
gRNA13862	Peak565	873	3	768	2	437	1
gRNA10305	Peak429	2136	20	1820	7	3025	24
gRNA23293	Peak950	721	4	735	4	516	5
gRNA13107	Peak532	1566	2716	1762	3131	1864	18
gRNA7180	Peak289	1385	6	628	18	1423	8
gRNA14456	Peak589	355	3	359	1	661	2
gRNA30350	Peak1304	512	3	358	3	339	5
gRNA14466	Peak589	116	0	48	1	129	0
gRNA27491	Peak1157	2022	7	758	18	985	8
gRNA22119	Peak903	470	5	574	1	115	2
gRNA24668	Peak1019	1630	12	1467	901	1342	15
gRNA6178	Peak261	995	14	1008	4	1034	3
gRNA4231	Peak183	2130	7	1513	14	1322	13
gRNA25415	Peak1052	613	7	57	11	718	0
gRNA25423	Peak1053	2183	16	2674	12	1510	26
gRNA4726	Peak202	1885	14	911	10	2272	20
gRNA24543	Peak1013	89	2	131	1	134	1
gRNA7275	Peak292	2294	17	2118	26	1866	25
gRNA11370	Peak464	1484	8	390	10	1493	7
gRNA15097	Peak622	573	6	362	5	788	1
gRNA34192	Peak1476	984	6	539	5	838	2
gRNA32702	Peak1411	3394	39	3376	676	2289	31
gRNA416	Peak13	580	9	1168	13	597	6
gRNA18489	Peak758	442	6	629	1	600	6
gRNA14314	Peak585	1436	24	1923	12	718	425
gRNA16081	Peak661	1395	7	709	7	829	9
gRNA4088	Peak178	644	4	250	5	349	4
gRNA23473	Peak959	1077	2	513	1	711	9
gRNA38474	Peak1665	1336	11	1577	12	1926	14
gRNA8706	Peak354	402	4	136	1	544	2
gRNA26838	Peak1122	214	0	136	1	189	2
gRNA18028	Peak744	1955	41	1938	11	1806	36
gRNA25444	Peak1053	304	0	101	1	222	5
gRNA12940	Peak524	245	0	51	1	496	2
gRNA39108	Peak1686	87	2	25	1	274	2
gRNA2718	Peak112	89	0	27	0	55	0
gRNA22753	Peak927	1048	10	140	4	756	2
gRNA432	Peak13	444	11	1136	2	100	2
gRNA39681	Peak1718	3977	32	3090	24	4306	41
gRNA9998	Peak417	437	8	418	5	694	11
gRNA22785	Peak929	5510	68	3920	51	5202	39
gRNA10398	Peak431	2277	30	1747	22	1646	26
gRNA24863	Peak1027	773	8	500	2	660	1
gRNA34874	Peak1519	1330	15	818	10	1354	13
gRNA9405	Peak384	1368	9	1051	12	2007	15
gRNA39121	Peak1687	411	8588	862	11534	286	12442
gRNA2603	Peak106	7102	70	8716	78	8257	67
gRNA14767	Peak606	1112	5	287	11	774	6
gRNA20352	Peak845	1795	13	1121	22	1669	1137
gRNA29624	Peak1258	1801	6	1505	10	1349	11
gRNA27607	Peak1161	426	2	116	1	245	7
gRNA1198	Peak43	299	4	879	3	276	3
gRNA31350	Peak1352	590	8	895	1046	634	19
gRNA25355	Peak1049	547	8	169	6	280	5
gRNA25331	Peak1047	1923	14	1704	17	2914	25
gRNA36787	Peak1597	2260	15	1098	17	2579	15
gRNA20452	Peak847	3723	39	2830	48	4239	26
gRNA819	Peak24	128	1	332	1	173	2
gRNA19586	Peak814	47	0	17	2	0	0
gRNA28052	Peak1184	3922	36	3743	29	4233	39
gRNA574	Peak17	1006	7	404	0	802	3
gRNA6916	Peak285	614	16	606	11	1273	8
gRNA25330	Peak1047	3129	14	1814	22	4933	32
gRNA36765	Peak1597	730	5	448	176	500	7
gRNA35584	Peak1546	22914	281	18884	247	19739	253
gRNA35490	Peak1541	1039	10	862	8	550	679
gRNA35465	Peak1540	624	8	331	9	669	8
gRNA35456	Peak1540	482	2	218	3	509	7
gRNA29282	Peak1239	399	1	193	1	365	4
gRNA13971	Peak568	7626	108	7207	90	10586	91
gRNA916	Peak29	3323	971	4106	28	3467	3386
gRNA8882	Peak361	336	0	234	1	185	5
gRNA33639	Peak1449	4613	36	4937	43	6788	68
gRNA18293	Peak752	4	2	31	0	0	0
gRNA2151	Peak86	13322	133	9092	84	14813	4043
gRNA12092	Peak492	1119	4	1151	13	1517	6
gRNA35570	Peak1546	1287	7	927	2	990	19
gRNA7044	Peak288	1548	14	1346	9	1158	20
gRNA4364	Peak186	3499	42	1866	38	3690	50
gRNA34780	Peak1514	389	1	100	0	56	0
gRNA39052	Peak1684	1547	12	742	7	1117	16
gRNA25491	Peak1056	2307	24	721	18	2067	17
gRNA4782	Peak204	2406	16	2801	19	2216	20
gRNA22339	Peak913	7438	47	5705	53	10284	56
gRNA27455	Peak1154	25352	177	17164	196	25760	204
gRNA23159	Peak946	155	1	95	2	181	4
gRNA9687	Peak402	551	5	1450	12	760	11
gRNA28428	Peak1202	584	2	395	3	420	1
gRNA26416	Peak1101	5146	180407	3912	181452	4077	149740
gRNA17099	Peak706	1003	5	374	2	1014	7
gRNA25191	Peak1042	2402	12	1624	8	1963	11
gRNA16537	Peak679	878	5	1274	7	532	2
gRNA19879	Peak825	2560	23	1642	23	2248	2992
gRNA3583	Peak156	514	1	365	3	29	778
gRNA6710	Peak281	765	1	342	3	332	8
gRNA25906	Peak1077	547	2	307	3	364	4
gRNA28379	Peak1199	328	1	1201	2	91	2
gRNA16279	Peak669	1713	8	1038	6	1099	6
gRNA35531	Peak1544	3014	937	3243	329	3102	25
gRNA22825	Peak930	709	6	205	3	621	7
gRNA4133	Peak180	3347	21	3131	23	2677	24
gRNA27907	Peak1177	290	1	54	4	353	1
gRNA2114	Peak85	497	2	97	0	481	7
gRNA4773	Peak203	512	4	519	5	671	5
gRNA8526	Peak350	8367	106	7399	68	6779	2772
gRNA8941	Peak364	1162	10	1550	14	2098	17
gRNA23144	Peak945	315	11	111	8	409	0
gRNA32839	Peak1417	1422	8	874	32	1073	23
gRNA22287	Peak911	574	6	368	5	961	4
gRNA19143	Peak786	1502	9	266	13	2041	10
gRNA11204	Peak459	1673	6	1057	20	1078	13
gRNA20962	Peak867	531	1	406	6	198	3
gRNA30938	Peak1337	1644	10	869	12	2522	14
gRNA5456	Peak229	1756	7	774	14	1719	12
gRNA16331	Peak672	1337	8	845	6	1046	15
gRNA32645	Peak1408	138	10	97	0	125	0
gRNA4914	Peak208	36	0	16	1	0	0
gRNA29901	Peak1273	2937	23	2445	24	2800	16
gRNA12365	Peak504	1571	20	721	10	1036	11
gRNA5805	Peak242	4662	36	4355	30	4689	39
gRNA32785	Peak1415	372	0	123	0	52	2
gRNA19500	Peak811	3098	24	2607	26	2804	36
gRNA19861	Peak825	1761	18	1455	8	2411	17
gRNA3579	Peak156	24069	234	16743	235	32290	240
gRNA31045	Peak1341	521	5	649	4	361	0
gRNA34390	Peak1487	1821	45	993	49	1966	14201
gRNA18374	Peak756	808	1843	615	2591	743	73
gRNA17583	Peak731	195	1	318	3	156	1
gRNA15039	Peak619	685	15	305	5	944	7
gRNA28689	Peak1216	1787	10	1056	11	1064	11
gRNA4950	Peak209	1737	10	1734	20	1169	9
gRNA5143	Peak217	4726	31	4608	37	2888	40
gRNA39577	Peak1712	2240	13	1830	17	1957	13
gRNA26793	Peak1119	2668	80318	2990	51915	2431	67525
gRNA29812	Peak1267	5152	50	2588	55	4338	33
gRNA24026	Peak981	559	4	259	13	257	4
gRNA33557	Peak1447	945	6	972	8	1107	7
gRNA29416	Peak1245	1229	6	1739	12	1097	8
gRNA31205	Peak1346	43	0	123	1	67	0
gRNA3088	Peak129	146	1	32	1	192	0
gRNA17036	Peak703	4851	52	2067	60	5071	66
gRNA30883	Peak1335	1314	7	947	9	1350	13
gRNA1405	Peak51	315	3	564	4	274	3
gRNA2519	Peak103	229	1	363	1	243	1
gRNA33290	Peak1435	499	4	726	4	977	7
gRNA23199	Peak947	39	0	46	0	176	0
gRNA3925	Peak171	603	1	483	4	728	1
gRNA32595	Peak1407	4159	25	667	112	3993	25
gRNA17922	Peak742	598	2	914	0	548	6
gRNA16377	Peak673	1389	8	1300	7	1387	14
gRNA5096	Peak213	767	5	528	0	449	3
gRNA19735	Peak818	294	0	36	1	279	2
gRNA14219	Peak578	1631	7	1131	17	1918	17
gRNA6508	Peak275	542	2	745	4	305	1
gRNA37822	Peak1631	625	5	601	3	536	11
gRNA34767	Peak1513	100	0	10	0	1	0
gRNA26943	Peak1126	167	0	11	0	19	0
gRNA20096	Peak834	5814	56	4532	68	6741	61
gRNA34940	Peak1522	1537	1142	426	6	1898	15
gRNA27344	Peak1150	2261	14	1296	16	1662	13
gRNA22316	Peak913	603	1	768	4	710	1
gRNA4923	Peak209	3129	14	2807	29	2711	22
gRNA16264	Peak669	276	6	44	2	217	0
gRNA27405	Peak1153	762	4	949	6	787	5
gRNA37330	Peak1615	542	9	672	6	631	2
gRNA26110	Peak1091	243	0	60	0	98	1
gRNA31061	Peak1342	5641	41	6891	41	6568	43
gRNA35525	Peak1543	1231	11	1652	12	1037	17
gRNA28994	Peak1228	595	8	1687	8	317	7
gRNA22296	Peak912	7286	97412	5097	85418	6005	77299
gRNA25301	Peak1046	1987	9	1381	18	2041	14
gRNA31723	Peak1363	7090	45	7247	56	6010	59
gRNA24206	Peak991	507	1	304	13	455	2
gRNA20174	Peak838	566	2	337	2	427	6
gRNA28684	Peak1216	130	2	111	4	102	5
gRNA4924	Peak209	8753	175065	11572	106807	11783	102834
gRNA35156	Peak1531	419	0	193	4	324	1
gRNA15865	Peak650	64	2	31	3	188	0
gRNA7958	Peak323	1777	11	806	15	1327	347
gRNA33546	Peak1446	1048	2	1405	9	850	4
gRNA2013	Peak80	71	3	351	0	391	1
gRNA28982	Peak1228	1599	56	1572	23	1613	26
gRNA731	Peak21	927	11	570	7	693	5
gRNA12040	Peak489	3417	9	1086	21	2412	397
gRNA15879	Peak650	915	7	180	3	868	9
gRNA21090	Peak874	234	6	104	4	52	1
gRNA10986	Peak450	419	4	494	4	925	2
gRNA28927	Peak1227	50	0	32	1	35	0
gRNA3016	Peak125	251	0	230	0	639	3
gRNA29398	Peak1244	2833	21	806	23	3376	27
gRNA24178	Peak990	336	3	794	1	59	1
gRNA22902	Peak935	182	0	196	8	427	4
gRNA24202	Peak991	8591	62	6742	69	10304	54
gRNA18452	Peak757	187	0	330	1	7	0
gRNA28059	Peak1185	600	172	226	6	280	5
gRNA29944	Peak1276	10263	76	5951	4400	6225	81
gRNA29531	Peak1250	828	2	245	6	522	7
gRNA16566	Peak680	189	3	118	0	16	0
gRNA38881	Peak1680	4079	134921	3054	170441	3321	119103
gRNA25409	Peak1052	3224	33	1307	33	2740	42
gRNA21914	Peak896	531	5	252	4	1005	3
gRNA18638	Peak762	4591	28	5475	37	2681	28
gRNA29542	Peak1252	147	0	17	1	42	1
gRNA17316	Peak719	3350	24	2549	19	2269	22
gRNA7428	Peak296	653	5	634	1	386	3
gRNA33888	Peak1461	474	1	101	3	618	7
gRNA33918	Peak1462	159	0	29	3	3	1
gRNA10388	Peak431	60	1	28	0	37	0
gRNA25849	Peak1074	621	9	922	11	698	6
gRNA29919	Peak1275	417	2	103	8	232	1
gRNA32489	Peak1400	138	4	346	5	178	0
gRNA18052	Peak744	2533	180076	3232	158728	2898	108809
gRNA14055	Peak571	1258	11	847	1816	1195	17
gRNA7681	Peak308	217	2	584	4	777	3
gRNA39842	Peak1724	236	3	122	6	457	1
gRNA30332	Peak1303	449	2	400	5	506	5
gRNA14747	Peak605	1684	9	2078	9	1969	15
gRNA4401	Peak188	763	14	1022	10	764	12
gRNA26113	Peak1091	248	0	43	2	441	3
gRNA16788	Peak689	589	2	631	3	670	2
gRNA31980	Peak1371	104	0	22	0	232	0
gRNA32469	Peak1399	267	2	686	9	116	1
gRNA4281	Peak184	3542	40	2941	20	2903	17
gRNA38269	Peak1657	12613	87	10682	94	8464	123
gRNA2532	Peak103	1145	13	940	4	570	8
gRNA5464	Peak229	844	3290	547	7723	1315	3955
gRNA6909	Peak285	1306	1375	965	1135	1544	18
gRNA8865	Peak360	5	0	1	0	17	0
gRNA25464	Peak1054	202	0	70	3	187	2
gRNA7055	Peak288	601	1	157	3	939	10
gRNA35187	Peak1533	1894	1762	1450	371	1572	14
gRNA16850	Peak693	9544	115	7002	76	11878	84
gRNA6105	Peak258	141	2	104	0	168	3
gRNA3348	Peak141	2793	28	2977	26	2781	16
gRNA17147	Peak709	3883	31	3264	39	4172	31
gRNA7148	Peak289	2791	21	2104	19	2417	18
gRNA6696	Peak280	334	0	90	0	530	2
gRNA12219	Peak497	220	3	370	1	215	3
gRNA10742	Peak442	1074	2	600	3	955	7
gRNA7782	Peak312	1513	16	1004	10	1269	8
gRNA10232	Peak426	25	0	27	3	69	0
gRNA33686	Peak1453	1080	13	719	7	963	7
gRNA11722	Peak479	909	4	684	7	1065	10
gRNA34284	Peak1481	671	7	907	7	1389	4
gRNA9844	Peak409	3404	32	2030	23	4324	29
gRNA914	Peak29	776	7	1236	6	1018	3
gRNA32323	Peak1391	503	5	869	3	535	2
gRNA16535	Peak679	541	4	530	8	153	3
gRNA16517	Peak679	666	3	223	3	391	5
gRNA8161	Peak332	5744	54	5582	43	7115	69
gRNA9551	Peak393	1055	8	648	1	327	11
gRNA24866	Peak1027	5973	205	4577	46	4949	46
gRNA24386	Peak1005	746	6	62	4	72	7
gRNA15323	Peak631	4879	28	2028	24	4095	28
gRNA27956	Peak1180	212	7	518	3	650	2
gRNA22314	Peak913	420	26339	435	27715	305	30341
gRNA16521	Peak679	1184	5	1255	10	1001	4
gRNA10600	Peak436	363	1	95	57	495	6
gRNA39542	Peak1710	981	31	237	21	1086	11
gRNA23900	Peak974	1039	12	511	389	1654	9
gRNA21147	Peak875	11	0	116	0	1	1
gRNA11988	Peak487	320	2	266	4	493	0
gRNA18061	Peak745	195	0	153	1	112	1
gRNA18636	Peak762	1230	7	947	7	1279	7
gRNA30881	Peak1335	75	2	35	1	172	1
gRNA28529	Peak1207	470	5	197	1	403	3
gRNA30329	Peak1303	523	1	353	6	608	0
gRNA30672	Peak1321	622	10	514	5	865	5
gRNA28528	Peak1207	1125	5	900	6	1097	4
gRNA32893	Peak1418	325	0	79	2	45	2
gRNA32895	Peak1418	205	3	304	2	523	1
gRNA8719	Peak355	4351	34	1887	33	3073	2163
gRNA32897	Peak1418	105	1	41	0	160	1
gRNA743	Peak22	234	1	42	0	137	0
gRNA38465	Peak1665	488	8	76	4	595	2
gRNA34331	Peak1484	3720	197294	3770	123268	3571	139100
gRNA31145	Peak1344	1590	7	1119	15	1350	15
gRNA20392	Peak847	681	4	425	2	965	11
gRNA32904	Peak1418	0	0	0	0	0	0
gRNA32961	Peak1421	1716	6	1453	21	1229	7
gRNA2468	Peak101	874	16275	479	5746	902	7502
gRNA30250	Peak1299	403	7	761	1	990	5
gRNA34887	Peak1520	807	7	381	5	654	7
gRNA21717	Peak892	292	2	99	2	247	2
gRNA5180	Peak218	1600	7	834	11	755	6
gRNA22955	Peak936	12	0	18	0	42	0
gRNA11516	Peak470	1032	4	407	8	440	5
gRNA65	Peak3	602	6	1913	5	169	4
gRNA38914	Peak1681	1004	9	459	7	1331	4
gRNA19703	Peak818	1023	64629	2200	67567	1005	30786
gRNA8551	Peak350	989	9	1151	9	532	2
gRNA6252	Peak264	9540	46	10527	750	8369	65
gRNA9237	Peak377	3185	28	4388	28	2751	28
gRNA36669	Peak1594	1843	21	1347	21	1765	16
gRNA12689	Peak516	10808	77	5112	90	7763	89
gRNA26657	Peak1113	13	0	0	0	0	0
gRNA35626	Peak1548	980	6	693	4	1186	8
gRNA16577	Peak681	1582	11	1603	8	1422	11
gRNA6104	Peak258	81	1	197	0	122	0
gRNA16690	Peak684	3642	39	3143	46	4053	51
gRNA27128	Peak1140	42	0	250	0	81	3
gRNA5094	Peak213	299	6	104	3	123	6
gRNA19679	Peak817	650	7	586	10	775	7
gRNA13622	Peak555	483	2	318	3	310	7
gRNA4306	Peak185	8132	64	12392	53	7992	54
gRNA5814	Peak242	209	3	1005	3	227	5
gRNA31611	Peak1360	619	1	228	8	607	1
gRNA29219	Peak1235	525	4	545	5	543	1
gRNA8508	Peak349	652	4	1276	4	695	6
gRNA32985	Peak1423	788	21	586	12	244	10
gRNA27738	Peak1169	3154	25	2846	20	2055	37
gRNA23335	Peak952	484	6	471	4	532	717
gRNA14504	Peak591	812	8	1092	3	418	5
gRNA4414	Peak188	35	0	35	0	32	0
gRNA31119	Peak1343	2031	14	1407	29	1414	14
gRNA15734	Peak645	612	3	159	4	1026	4
gRNA31940	Peak1370	407	2	79	4	202	0
gRNA30071	Peak1284	1317	3	1126	7	1077	30
gRNA32793	Peak1416	2455	75699	1598	99252	2061	122073
gRNA890	Peak27	364	2	199	1	340	7
gRNA18269	Peak752	1688	18	1285	11	1373	10
gRNA1224	Peak43	1722	1323	1449	593	2128	1064
gRNA2178	Peak88	258	7	217	6	88	3
gRNA4085	Peak178	41	2	182	0	27	0
gRNA21122	Peak875	229	2	411	7	361	2
gRNA1754	Peak68	324	0	202	0	124	1
gRNA20092	Peak834	618	3	320	3	211	7
gRNA31953	Peak1370	1428	4	1890	9	1339	9
gRNA12736	Peak518	15	1	25	1	26	1168
gRNA4080	Peak178	55	1	32	1	283	0
gRNA9242	Peak377	260	3	418	2	75	5
gRNA39216	Peak1691	2524	31	1671	19	2773	28
gRNA7785	Peak312	151	1	129	0	174	2
gRNA35049	Peak1527	1234	8	657	8	1201	6
gRNA30527	Peak1312	524	5	596	8	332	2
gRNA32811	Peak1417	323	1	1194	4	201	7
gRNA13243	Peak539	1030	10	1168	7	1617	9
gRNA13892	Peak567	236	1	37	0	138	0
gRNA2027	Peak80	12527	6308	16259	2226	15171	143
gRNA25854	Peak1074	31	0	14	0	0	1
gRNA22223	Peak907	177	1	39	0	201	0
gRNA33820	Peak1458	4820	46	3551	43	5226	38
gRNA29749	Peak1265	2475	17	1722	16	2614	18
gRNA35768	Peak1552	1744	8	1575	21	2097	12
gRNA32213	Peak1385	945	133	800	3171	493	98
gRNA20737	Peak860	11	0	31	0	106	0
gRNA24702	Peak1020	1050	12	869	4	1023	11
gRNA30597	Peak1319	1792	6	535	4	820	8
gRNA6311	Peak266	6799	63	4581	80	6731	62
gRNA852	Peak26	490	2	130	0	121	3
gRNA4300	Peak185	192	49	265	1	53	0
gRNA18027	Peak744	1670	15	1363	14	1251	15
gRNA7043	Peak288	835	4	616	11	1134	7
gRNA35385	Peak1537	2319	12	2671	11	1618	24
gRNA7377	Peak295	59	0	24	0	1	4
gRNA29894	Peak1273	139	2	256	0	149	1
gRNA12968	Peak525	1619	25	1345	7	1589	14
gRNA18202	Peak750	1563	5	2266	23	1704	11
gRNA37931	Peak1638	1201	9	1414	9	1220	5
gRNA32390	Peak1396	679	11	1578	2	582	204
gRNA39300	Peak1694	663	5	823	1	538	4
gRNA35111	Peak1530	329	1	103	0	69	10
gRNA10983	Peak450	239	3	485	3	113	2
gRNA37864	Peak1633	1081	7	1396	11	937	8
gRNA5988	Peak252	448	10	353	3	160	0
gRNA34731	Peak1509	1195	2906	541	11516	1129	9267
gRNA35309	Peak1535	3077	14	3090	23	2555	19
gRNA11211	Peak459	126	1	148	6	78	2
gRNA27262	Peak1147	2944	7982	2326	2105	2381	44
gRNA29703	Peak1263	1216	6	237	5	1006	3
gRNA19044	Peak778	1174	3	131	7	768	11
gRNA16659	Peak683	1469	18	2233	14	2669	14
gRNA3715	Peak163	2003	16	2186	16	2762	17
gRNA5215	Peak220	1387	5	2189	7	1474	9
gRNA12965	Peak525	5650	84	7988	71	9614	1954
gRNA3745	Peak164	2372	42	3320	34	3095	46
gRNA14584	Peak596	645	7	658	7	546	9
gRNA14605	Peak597	2051	25	1356	24	2066	20
gRNA38725	Peak1675	49	0	45	0	44	2
gRNA14173	Peak576	264	2	117	3	472	2
gRNA13550	Peak552	729	5	339	7	916	3
gRNA12735	Peak518	550	3	206	8	633	3
gRNA9653	Peak399	560	10	756	6	617	3
gRNA4830	Peak205	1185	12	1908	10	917	11
gRNA6336	Peak267	3211	37	3361	27	3114	20
gRNA4160	Peak180	253	2	339	1	108	2
gRNA37808	Peak1630	1165	9	1266	3	1204	8
gRNA3584	Peak156	972	4	1685	9	502	14
gRNA28484	Peak1205	789	7	2333	8	847	4
gRNA11229	Peak460	1427	9	1708	30	1335	12
gRNA24551	Peak1013	211	1	85	1	1	1
gRNA2810	Peak117	383	2	89	3	385	2
gRNA19039	Peak778	841	1	1317	8	887	7
gRNA5315	Peak225	1200	10	685	2	668	7
gRNA34074	Peak1469	653	4	923	6	886	4
gRNA30116	Peak1289	708	9	618	6	860	5
gRNA38342	Peak1661	1184	5	636	3	517	10
gRNA5344	Peak225	6537	60	6021	34	7298	88
gRNA26501	Peak1106	339	1	203	2	110	1
gRNA36906	Peak1598	129	0	58	5	129	0
gRNA1796	Peak70	968	5	362	802	1176	4
gRNA26361	Peak1097	3791	34	2986	32	4468	24
gRNA33612	Peak1449	2536	12	1901	10	1480	16
gRNA640	Peak19	298	4	95	2	209	1
gRNA28274	Peak1195	1015	4	934	741	466	11
gRNA32255	Peak1387	2176	18	2093	31	746	15
gRNA29059	Peak1230	674	50	727	51	661	35
gRNA44	Peak2	2173	10	1346	15	1693	11
gRNA23482	Peak959	583	4	1277	6	710	7
gRNA35046	Peak1527	726	7	892	3	618	9
gRNA10643	Peak438	866	8	497	17	552	16
gRNA10674	Peak439	1631	49	1762	79	864	15
gRNA3032	Peak125	4778	37	3738	57	6942	60
gRNA28334	Peak1197	465	11	478	133	281	2
gRNA17417	Peak725	1732	10	1038	13	2843	50
gRNA1872	Peak71	2171	16	742	17	1871	18
gRNA9820	Peak408	2723	22	3069	45	2709	32
gRNA10935	Peak448	1672	6	1259	3	1026	6
gRNA39459	Peak1704	2284	5530	3005	4139	1963	299
gRNA30537	Peak1313	192	2	98	1	35	0
gRNA16840	Peak692	902	6	809	8	491	11
gRNA28550	Peak1208	1303	12	1698	7	1466	8
gRNA29492	Peak1249	1184	8	850	2	502	4
gRNA14130	Peak575	521	1	209	3	604	0
gRNA25270	Peak1045	482	4	300	4	285	11
gRNA33640	Peak1449	436	4	441	5	490	3
gRNA20930	Peak866	1433	7	1280	15	1223	20
gRNA19631	Peak816	4577	55	5155	27	3740	50
gRNA23977	Peak978	680	2	607	4	1117	11
gRNA19411	Peak804	236	1	76	1	305	1
gRNA24421	Peak1007	258	1	158	0	81	4
gRNA8911	Peak363	4236	30	2432	27	3981	31
gRNA5835	Peak243	220	1	152	0	525	1
gRNA11780	Peak481	1102	15	1639	9	1340	11
gRNA33870	Peak1460	4564	123060	5130	108455	5311	128141
gRNA39798	Peak1721	899	10	260	4	989	7
gRNA15509	Peak637	1190	12	275	6	1496	10
gRNA34223	Peak1477	300	1	30	1	262	0
gRNA30295	Peak1301	2066	12	1241	13	1523	19
gRNA11891	Peak485	390	6	522	4	221	5
gRNA11186	Peak458	3943	33	2775	22	3190	32
gRNA13240	Peak539	843	9	480	7	1431	9
gRNA37710	Peak1627	1479	248	675	40	1084	36
gRNA26900	Peak1124	114	1	42	0	92	1
gRNA38875	Peak1679	1817	10	1032	16	1761	13
gRNA31547	Peak1357	1364	8	1695	6	912	6
gRNA19823	Peak822	1982	9	2260	9	2066	21
gRNA865	Peak27	1116	6	129	8	1663	5
gRNA32694	Peak1411	167	5	223	595	102	10
gRNA11408	Peak465	1250	1875	420	4856	1368	25
gRNA5078	Peak212	5200	873	3281	58	3683	1567
gRNA26138	Peak1094	208	0	238	1	105	1
gRNA39522	Peak1707	1768	14	581	8	2374	9
gRNA19683	Peak817	428	610	786	6	590	4
gRNA37798	Peak1630	465	3	1218	1	473	8
gRNA28960	Peak1228	51885	604	45967	2278	59695	11642
gRNA7251	Peak292	1267	7	637	6	807	7
gRNA2193	Peak89	2910	17	2641	24	4332	21
gRNA20405	Peak847	1911	12	1646	6	1078	15
gRNA4609	Peak197	373	2	597	1	145	8
gRNA10454	Peak431	4265	38	3748	29	5762	34
gRNA15862	Peak649	1112	10	1049	16	1244	10
gRNA154	Peak5	8776	83	6330	71	7857	72
gRNA2865	Peak119	2849	17	4795	25	2521	25
gRNA24565	Peak1014	94	0	32	0	44	0
gRNA11872	Peak484	3251	13	2128	30	3247	27
gRNA6712	Peak281	583	3	657	6	315	4
gRNA31984	Peak1371	1267	7	1597	14	2134	11
gRNA27795	Peak1173	985	6	999	5	1520	6
gRNA8268	Peak339	1904	17	2122	13	1922	14
gRNA30301	Peak1302	469	4	215	3	487	2
gRNA9929	Peak412	866	14	1115	12	822	11
gRNA162	Peak6	1089	8	1107	7	1062	5
gRNA1724	Peak66	2218	14	859	16	1246	31
gRNA31776	Peak1364	458	3	387	3	203	0
gRNA17400	Peak725	388	41	511	66	727	83
gRNA19705	Peak818	1697	46	491	59	1244	20
gRNA3639	Peak159	4584	32	4774	29	5410	38
gRNA32039	Peak1372	2305	64301	1479	75857	2173	76366
gRNA10244	Peak426	124	0	36	1	1	0
gRNA27133	Peak1140	666	6	662	5	486	9
gRNA38490	Peak1665	39	0	168	0	135	0
gRNA3613	Peak158	3753	38	1570	25	3548	28
gRNA10300	Peak429	669	5	311	2	457	5
gRNA635	Peak19	1456	92	1250	5	1815	6
gRNA17612	Peak732	933	5	511	7	830	3
gRNA21797	Peak894	106	0	47	0	202	1
gRNA6240	Peak264	1082	6	846	4	1470	9
gRNA35377	Peak1537	244	0	204	2	144	2
gRNA23274	Peak950	76	0	29	0	79	1
gRNA26257	Peak1097	2231	18	2719	20	2466	22
gRNA36657	Peak1594	836	13	605	3	1082	9
gRNA26299	Peak1097	43	0	7	0	109	0
gRNA9825	Peak408	378	3	681	6	779	3
gRNA4586	Peak196	823	877	935	9	854	8
gRNA31814	Peak1366	1218	14	255	9	2052	9
gRNA35232	Peak1533	1576	7	683	6	1209	8
gRNA7522	Peak304	357	1	97	4	547	5
gRNA25390	Peak1051	20027	420	30374	424	23412	405
gRNA27500	Peak1157	7063	52	8204	67	5162	75
gRNA36828	Peak1598	131	2	71	0	155	2
gRNA4663	Peak199	394	21	521	18	534	7
gRNA31117	Peak1343	2578	269	1141	1423	3084	905
gRNA5341	Peak225	526	4	708	16	919	2
gRNA7070	Peak288	628	5	226	5	563	11
gRNA12261	Peak499	1573	11	1396	10	980	7
gRNA26881	Peak1124	331	9	512	6	340	2
gRNA37619	Peak1625	907	8	583	2	616	10
gRNA38052	Peak1645	7379	53	5930	43	6351	49
gRNA2069	Peak82	5304	40	2778	31	4568	38
gRNA11261	Peak460	712	11	487	2	452	3
gRNA20666	Peak858	170	0	28	0	137	0
gRNA2430	Peak99	689	4	489	4	495	5
gRNA13954	Peak568	2415	16	2467	23	1696	18
gRNA30625	Peak1319	332	5	194	9	208	3
gRNA5413	Peak228	1778	13	915	708	1578	11
gRNA28593	Peak1211	1751	2300	949	21	1284	21
gRNA3534	Peak153	9	0	3	0	0	0
gRNA12071	Peak491	687	7	835	5	320	5
gRNA9107	Peak373	1352	19	950	12	1113	11
gRNA31409	Peak1353	9046	73	6450	69	7247	94
gRNA22131	Peak904	2117	15	1779	22	2149	18
gRNA6475	Peak272	654	0	67	1	236	5
gRNA21084	Peak874	9292	57	7895	76	7569	58
gRNA19580	Peak814	1279	49	151	12	705	26
gRNA35319	Peak1535	1839	28	1686	35	1142	2767
gRNA31195	Peak1346	1670	1201	1069	22	1768	15
gRNA35545	Peak1544	96	0	56	1	128	3
gRNA24140	Peak987	1058	10	410	3	583	4
gRNA30858	Peak1334	716	6	429	8	681	7
gRNA12876	Peak522	1990	18	1396	12	1012	11
gRNA25036	Peak1035	440	0	656	7	757	3
gRNA35351	Peak1536	381	3	111	2	265	2
gRNA9227	Peak376	1030	11	623	5	571	7
gRNA20115	Peak834	701	5	113	7	652	13
gRNA1686	Peak65	234	0	906	1	151	2
gRNA15507	Peak637	5038	35	4449	38	5660	32
gRNA13885	Peak567	1089	9	909	13	795	6
gRNA9830	Peak409	358	2	723	2	210	3
gRNA35375	Peak1537	1532	9	1369	30	602	5
gRNA22199	Peak906	2349	14	1761	10	2540	18
gRNA23752	Peak968	767	8	460	3	172	3
gRNA7486	Peak300	1115	4	1168	9	1135	7
gRNA26084	Peak1091	2501	21	1670	17	2441	24
gRNA28152	Peak1188	3567	40	2168	35	2898	1943
gRNA35922	Peak1561	530	8	199	4	553	6
gRNA23757	Peak968	1921	19	1454	17	2796	21
gRNA23075	Peak941	1681	2	271	7	713	12
gRNA16099	Peak662	770	9	490	2	986	7
gRNA11116	Peak456	550	1	199	2	152	1
gRNA20602	Peak855	419	11040	185	14701	315	7467
gRNA14300	Peak584	1858	14	2288	9	1419	19
gRNA1598	Peak61	333	5	268	7	527	3
gRNA34883	Peak1519	6657	64	5447	65	6326	67
gRNA27271	Peak1147	31393	318	17667	315	28780	349
gRNA8465	Peak347	734	1	528	8	324	4
gRNA32779	Peak1415	1694	12	1552	12	1521	18
gRNA23740	Peak968	313	5	929	6	540	4
gRNA19378	Peak800	107	1	32	1	211	2
gRNA8715	Peak354	1455	1216	555	8	987	10
gRNA9446	Peak386	446	3	454	2	254	6
gRNA10678	Peak440	728	6	1029	9	1298	7
gRNA13611	Peak554	430	0	334	4	631	4
gRNA34076	Peak1469	3569	17	2187	30	2957	2119
gRNA29929	Peak1275	871	8	729	5	1206	4
gRNA14527	Peak593	260	2	380	7	90	2
gRNA32180	Peak1382	261421	3792	306076	3966	456802	4210
gRNA27358	Peak1151	1615	8	1147	117	1427	10
gRNA8582	Peak351	1287	780	1933	9	1828	12
gRNA30776	Peak1328	108	0	37	3	182	1
gRNA30217	Peak1297	936	4	368	118	417	1
gRNA36400	Peak1585	1663	4770	1120	4882	1657	2920
gRNA39373	Peak1700	1356	13	2642	18	1468	10
gRNA31955	Peak1370	9304	86	7487	76	10116	92
gRNA30203	Peak1296	1860	22	1490	29	1745	14
gRNA2455	Peak100	4153	60	5224	44	4665	43
gRNA9253	Peak377	649	3	483	5	283	1
gRNA29043	Peak1229	311	2	104	1	61	1
gRNA12153	Peak495	402	6	171	0	148	0
gRNA35787	Peak1553	1576	15	943	13	1485	577
gRNA15106	Peak622	143	2	49	0	78	1
gRNA5914	Peak248	509	5	641	8	435	7
gRNA12163	Peak495	469	3	434	1	92	1
gRNA24208	Peak991	1311	24	1383	20	518	15
gRNA17593	Peak731	2348	22	1293	13	2458	14
gRNA32761	Peak1414	635	4	293	8	872	4
gRNA21998	Peak899	503	4	509	3	469	5
gRNA23859	Peak973	1500	6	479	6	2144	12
gRNA3300	Peak139	2669	15	2186	28	2579	14
gRNA31816	Peak1366	472	2	264	2	495	2
gRNA3137	Peak133	1322	18	2056	16	1306	691
gRNA31480	Peak1355	403	2	600	3	905	3
gRNA17590	Peak731	92	2	371	1	506	1
gRNA39555	Peak1711	271	0	69	4	124	1
gRNA38196	Peak1653	104	0	38	0	50	0
gRNA14322	Peak586	929	7	1072	9	326	13
gRNA24669	Peak1019	698	5	705	10	944	8
gRNA4816	Peak205	451	0	327	0	242	6
gRNA223	Peak8	851	30	884	27	727	23
gRNA8607	Peak352	1865	199	1147	172	595	309
gRNA5951	Peak249	39	0	7	0	1	0
gRNA18078	Peak745	651	2	569	4	277	7
gRNA37210	Peak1612	1051	5	844	13	785	5
gRNA25848	Peak1074	1501	9088	1184	88	1900	8785
gRNA39107	Peak1686	543	10	298	4	424	12
gRNA38464	Peak1665	661	5	497	720	604	6
gRNA13943	Peak568	742	3	135	6	1338	6
gRNA27820	Peak1174	2476	8543	2602	79	2124	3715
gRNA15316	Peak631	2655	26	2690	28	2381	19
gRNA13830	Peak563	1697	3702	864	24	2194	2384
gRNA22488	Peak918	1902	19	2604	15	3025	15
gRNA15218	Peak627	1827	15	1857	14	1864	12
gRNA18409	Peak756	1086	5	620	5	1212	8
gRNA16833	Peak692	1205	10	1024	11	1499	5
gRNA6457	Peak272	397	3	1119	2	204	3
gRNA13239	Peak539	285	1	471	4	84	3
gRNA22432	Peak915	476	2	282	1	330	0
gRNA35740	Peak1552	165	3	14	0	2	0
gRNA38475	Peak1665	128	4	89	1	206	2
gRNA1769	Peak69	262	2	93	0	562	1
gRNA4087	Peak178	196	2	57	0	150	5
gRNA39647	Peak1716	402	0	330	3	307	4
gRNA1737	Peak68	154	5	499	691	176	3
gRNA32831	Peak1417	278	2	898	1745	173	3
gRNA26347	Peak1097	3633	30	3495	27	2628	263
gRNA31901	Peak1369	829	10	679	13	269	433
gRNA32823	Peak1417	381	0	71	3	484	1
gRNA29888	Peak1271	4300	36	6732	36	3401	31
gRNA15830	Peak649	34	0	145	1	23	0
gRNA22422	Peak915	923	5	670	5	752	3
gRNA4595	Peak196	20481	7082	23092	235	21440	2883
gRNA38926	Peak1681	678	10	108	6	549	4
gRNA16463	Peak675	388	1	256	3	315	2
gRNA34793	Peak1516	542	7	323	3	943	10
gRNA11680	Peak478	309	1	200	1	73	6
gRNA33141	Peak1429	823	6	752	9	755	4
gRNA13300	Peak542	88	0	40	0	202	1
gRNA1315	Peak46	117	1	65	2	3	0
gRNA1709	Peak66	22	0	5	0	140	0
gRNA7632	Peak307	1892	15	2531	21	2636	24
gRNA5623	Peak234	1175	22	599	6	1412	6
gRNA8648	Peak353	1734	18	2827	7	1548	16
gRNA29808	Peak1267	1310	31	1126	10	1497	16
gRNA14541	Peak593	2717	24	2882	20	2205	16
gRNA17284	Peak716	310	0	187	2	70	1
gRNA28619	Peak1212	243	1	44	1	121	7
gRNA7620	Peak306	581	9	434	3	509	6
gRNA37402	Peak1616	1475	13	1270	8	1010	8
gRNA5150	Peak217	2787	20	2346	23	1896	17
gRNA2121	Peak85	2761	32	1246	33	3225	23
gRNA23206	Peak947	863	2	1192	931	711	9
gRNA35858	Peak1558	233	0	3	0	62	1
gRNA37139	Peak1608	357	2	634	2	626	4
gRNA14843	Peak609	976	8	1964	6	1581	8
gRNA16904	Peak695	757	8	761	2	699	8
gRNA37272	Peak1614	1043	7	989	12	585	10
gRNA16828	Peak692	202	575	52	1	95	0
gRNA8598	Peak352	1107	9	865	7	1228	7
gRNA31381	Peak1353	633	4	907	3	757	11
gRNA5098	Peak213	2895	20	2055	24	2432	18
gRNA43	Peak2	1240	6	756	8	1565	18
gRNA16498	Peak677	1676	8	2167	12	993	12
gRNA17839	Peak739	14165	14871	11792	8447	13552	15836
gRNA1958	Peak77	1004	10	830	17	703	12
gRNA28584	Peak1211	3271	107718	3625	121842	4156	113598
gRNA29563	Peak1254	2035	16	1454	725	721	23
gRNA14016	Peak570	2262	3457	1072	43	1812	33
gRNA31684	Peak1362	2369	11	2096	22	2945	13
gRNA2440	Peak100	699	5	443	1	810	7
gRNA12722	Peak517	189	0	26	0	217	2
gRNA10603	Peak436	2031	17	1720	27	1442	15
gRNA39030	Peak1683	933	15	963	5	729	6
gRNA17914	Peak742	777	8	401	9	874	9
gRNA30015	Peak1282	17193	121	7123	122	21181	117
gRNA19033	Peak778	1162	12	1195	64	1222	351
gRNA38441	Peak1665	1752	16	2722	20	1934	21
gRNA37344	Peak1615	1717	20	1265	27	1431	1174
gRNA721	Peak21	1281	44	828	11	1120	9
gRNA17499	Peak728	9052	90	5849	76	8473	89
gRNA13940	Peak568	1250	18	1640	26	997	4
gRNA32173	Peak1381	272	0	214	0	56	0
gRNA3675	Peak161	650	3	423	3	336	3
gRNA28975	Peak1228	623	22593	201	16094	355	24786
gRNA22209	Peak906	741	5	842	6	1163	3
gRNA26778	Peak1118	18924	3623	29266	486	25555	264
gRNA38703	Peak1673	882	7	933	7	878	18
gRNA30958	Peak1338	3736	1092	3015	37	3391	32
gRNA17756	Peak737	1369	14	2161	10	1058	11
gRNA29456	Peak1247	6423	37788	6806	53727	4907	53371
gRNA17228	Peak711	2426	14	1531	12	2443	17
gRNA36769	Peak1597	2486	18	3430	16	2580	19
gRNA25018	Peak1035	2696	355	1336	20	3315	19
gRNA4615	Peak197	92	2	14	0	1	0
gRNA33149	Peak1429	1202	7	1372	715	2389	7
gRNA11781	Peak481	547	9	546	3	719	1
gRNA11038	Peak453	762	2	436	2	167	7
gRNA31501	Peak1355	819	10	687	306	1023	9
gRNA12693	Peak516	1937	19	2197	23	1761	10
gRNA32623	Peak1408	48	0	21	0	94	2
gRNA767	Peak23	359	5610	643	4442	515	2938
gRNA11238	Peak460	19	0	200	0	0	0
gRNA38989	Peak1682	244	4	335	2	277	3
gRNA2314	Peak94	717	11	1261	2	1198	8
gRNA11067	Peak454	1193	10	640	11	1925	13
gRNA11970	Peak486	2303	26	3960	18	1904	19
gRNA7536	Peak304	262	2	806	8	381	2
gRNA26286	Peak1097	872	9	1221	6	795	8
gRNA1851	Peak71	3283	16	1388	26	2417	24
gRNA15622	Peak641	2800	2962	2164	5329	2400	2560
gRNA22751	Peak927	213	3	198	1	99	6
gRNA15179	Peak625	7708	56	5396	707	7869	43
gRNA8006	Peak324	909	8	1317	10	828	10
gRNA33530	Peak1445	1114	4	453	12	918	3
gRNA34920	Peak1522	114	3	13	1	570	0
gRNA14315	Peak585	337	1	354	3	125	5
gRNA27837	Peak1174	3142	12	2171	12	2145	15
gRNA31147	Peak1344	159	0	8	0	42	0
gRNA18584	Peak761	699	5	599	4	210	1
gRNA19237	Peak792	758	16	659	15	745	18
gRNA27294	Peak1148	472	4	268	3	345	3
gRNA18062	Peak745	136	2	56	0	273	1
gRNA12762	Peak518	433	5	440	7	364	2
gRNA6766	Peak282	229	1	186	3	668	1
gRNA33228	Peak1432	1619	13	984	11	1530	14
gRNA28962	Peak1228	7408	56	3807	71	8476	70
gRNA17615	Peak732	1998	1525	1324	12	1584	17
gRNA2326	Peak94	659	2	676	6	630	5
gRNA26498	Peak1106	1351	17	1546	13	780	10
gRNA31902	Peak1369	70	0	0	0	6	0
gRNA25760	Peak1069	1689	6	384	12	1787	18
gRNA32826	Peak1417	1231	6	1618	17	2038	9
gRNA22395	Peak914	810	6	148	4	955	4
gRNA363	Peak11	556	1	205	2	101	2
gRNA11658	Peak477	488	8	205	3	751	2
gRNA33968	Peak1464	1753	14	1042	10	2163	9
gRNA33635	Peak1449	2303	27	2521	26	2993	22
gRNA3762	Peak164	224	1	126	2	225	2
gRNA31251	Peak1348	1275	4725	1206	27	1700	15
gRNA26761	Peak1118	105	3	65	2	365	3
gRNA19840	Peak823	356	2	832	3	270	15
gRNA30884	Peak1335	255	6	278	0	264	0
gRNA24511	Peak1010	147	0	56	0	173	3
gRNA4302	Peak185	543	3	218	8	519	3
gRNA18420	Peak756	1511	3	1103	5	849	8
gRNA24181	Peak990	101	0	51	1	91	0
gRNA14181	Peak576	463	7	226	16	418	9
gRNA2775	Peak115	184	1	141	0	101	18
gRNA7612	Peak306	419	2	81	2	242	1
gRNA14385	Peak587	2976	23	1382	19	2063	20
gRNA32937	Peak1420	673	2	753	4	380	4
gRNA36443	Peak1586	449	2	240	4	607	1
gRNA18685	Peak764	460	14	493	4	439	10
gRNA39034	Peak1683	731	8	234	7	517	7
gRNA28074	Peak1185	2832	28	2003	17	2042	30
gRNA7200	Peak290	144	5	41	4	336	2
gRNA22692	Peak925	997	7	860	6	1585	3
gRNA12943	Peak524	6095	51	4235	69	7050	48
gRNA10363	Peak431	52	0	10	0	97	1
gRNA36726	Peak1597	154	0	332	1	274	2
gRNA21791	Peak894	1277	5424	1943	331	739	17
gRNA15518	Peak637	2805	16	2944	11	1977	22
gRNA4129	Peak180	219	2	80	3	200	0
gRNA22660	Peak924	547	842	583	868	428	294
gRNA22970	Peak936	3266	31	4666	600	3945	26
gRNA24073	Peak984	1792	15	835	8	1777	19
gRNA37442	Peak1617	8882	112	12901	120	18084	114
gRNA20753	Peak861	2487	19	4181	20	2826	13
gRNA775	Peak23	505	1	191	1	365	3
gRNA31972	Peak1371	2328	17	2184	17	2837	27
gRNA9769	Peak406	4886	54	7010	53	10005	77
gRNA19296	Peak794	1619	13	316	16	1391	11
gRNA14506	Peak591	269	1	149	2	276	1
gRNA15934	Peak653	558	2035	1077	1981	526	6798
gRNA33869	Peak1460	957	4	818	3	828	9
gRNA26932	Peak1126	549	11	529	6	677	10
gRNA38972	Peak1682	773	7	1172	34	849	2
gRNA14165	Peak576	123	1	41	2	126	2
gRNA12017	Peak488	212	2	55	0	19	4
gRNA19990	Peak829	1139	22	887	7	488	4
gRNA247	Peak9	225	1	54	0	238	1
gRNA27276	Peak1147	418	2	354	3	493	1
gRNA29778	Peak1266	363	4	1064	7	572	9
gRNA7092	Peak288	988	9	1162	6	1036	5
gRNA18024	Peak744	10284	72	8836	68	8292	71
gRNA25251	Peak1044	1618	13	1870	9	921	13
gRNA7977	Peak323	1749	13	1095	10	1448	11
gRNA35756	Peak1552	637	2	525	1	470	5
gRNA20046	Peak832	691	3	692	3	430	8
gRNA5340	Peak225	50	1	28	0	24	1
gRNA38696	Peak1673	105	0	14	1	70	0
gRNA4336	Peak186	946	4	1660	2	1085	3
gRNA31925	Peak1370	1258	4	1957	9	1352	11
gRNA23551	Peak962	7884	51	6204	50	5789	48
gRNA9707	Peak404	153	0	69	7	48	2
gRNA39386	Peak1701	442	2	279	6	9	3
gRNA15867	Peak650	1491	5	419	3	1055	14
gRNA37682	Peak1626	502	1	423	3	619	4
gRNA13312	Peak542	709	7	1421	11	661	863
gRNA20363	Peak845	454	3	160	5	486	3
gRNA17743	Peak736	743	5	866	2	373	7
gRNA21826	Peak894	73	1	190	5	130	1
gRNA15271	Peak628	435	5	845	4	566	1
gRNA6397	Peak270	28	0	211	0	43	2
gRNA34576	Peak1500	532	2	97	5	186	3
gRNA32163	Peak1380	2794	20	824	10	2387	17
gRNA3979	Peak172	4044	25	3963	18	4459	16
gRNA27551	Peak1159	642	4	716	6	352	5
gRNA9623	Peak398	10058	86	7198	10658	9985	97
gRNA9515	Peak390	293	3	313	1	280	0
gRNA753	Peak23	2846	27	1515	20	3630	23
gRNA21957	Peak898	468	1	610	14	468	2938
gRNA35352	Peak1536	1571	20	1313	15	1146	16
gRNA34867	Peak1518	1220	4	293	7	518	5
gRNA5349	Peak226	46	1	438	2	0	2
gRNA837	Peak26	3900	23	3981	27	3761	35
gRNA36413	Peak1585	562	5	340	4	583	1
gRNA36637	Peak1594	1280	5	1249	13	724	11
gRNA16374	Peak673	2825	27	1747	23	4038	36
gRNA3962	Peak171	986	10	909	4	828	11
gRNA34922	Peak1522	1585	565	1450	6	1710	18
gRNA11076	Peak454	2319	11	637	15	1616	8
gRNA39110	Peak1686	12522	150	26419	141	17088	129
gRNA30595	Peak1319	42	1	6	5	6	2
gRNA8651	Peak353	3368	884	2631	562	3958	5137
gRNA3692	Peak161	1039	9	1783	8	1204	7
gRNA20285	Peak842	1026	8	424	11	1196	10
gRNA15886	Peak650	1783	21	1045	20	1371	14
gRNA26853	Peak1123	2130	13	2554	22	2018	19
gRNA7221	Peak291	435	3	199	7	410	4
gRNA25124	Peak1039	312	4	237	1	206	0
gRNA35652	Peak1548	1925	16	1542	6	2432	16
gRNA33974	Peak1464	80	0	31	2	1	3
gRNA32876	Peak1418	870	28	642	5	536	6
gRNA3679	Peak161	509	3	279	6	521	9
gRNA23256	Peak950	791	4	222	3	595	2
gRNA20923	Peak866	2558	20	3110	17	2880	25
gRNA7257	Peak292	2350	14	545	7	2382	10
gRNA17819	Peak738	3010	34	3620	25	4374	28
gRNA35746	Peak1552	5548	1042	3738	44	4277	2737
gRNA18756	Peak768	4667	46	7815	53	3613	51
gRNA828	Peak25	655	19	436	37	539	28
gRNA4245	Peak183	138	1	53	2	89	0
gRNA5483	Peak230	912	8	1080	19	897	11
gRNA16443	Peak675	241	0	54	0	442	0
gRNA25882	Peak1075	1158	8029	1134	75	1181	17858
gRNA36468	Peak1586	355	4	118	1	501	3
gRNA37935	Peak1638	274	6	1504	3	133	1
gRNA37665	Peak1626	946	2	1339	7	937	7
gRNA29052	Peak1230	1943	21	846	8	2915	22
gRNA17906	Peak742	1377	1266	759	11	609	10
gRNA32905	Peak1418	980	14	504	3	870	5
gRNA21564	Peak884	329	0	162	2	193	3
gRNA30219	Peak1297	3058	41	4669	26	2143	28
gRNA29552	Peak1253	85	0	17	0	63	0
gRNA13330	Peak543	147	1	31	3	93	0
gRNA37077	Peak1606	754	8	620	7	720	10
gRNA6716	Peak281	1109	6	563	5	944	9
gRNA5909	Peak248	1387	10	664	44	1118	8
gRNA28705	Peak1217	260	3	148	0	242	4
gRNA29179	Peak1234	3399	24	3460	39	3174	45
gRNA18271	Peak752	5430	32	2973	42	4753	33
gRNA33630	Peak1449	4833	18	2325	24	2812	24
gRNA39562	Peak1711	2157	14	1221	21	1472	14
gRNA19249	Peak792	634	2	484	8	927	4
gRNA6603	Peak278	1226	7	370	3	1367	12
gRNA12086	Peak492	660	5	234	2	623	5
gRNA25913	Peak1078	448	17	120	1	145	2
gRNA3113	Peak131	283	0	59	2	4	0
gRNA12598	Peak512	163	0	43	0	286	0
gRNA18405	Peak756	1272	6	397	13	654	8
gRNA36774	Peak1597	1011	10	537	9	1520	5
gRNA18126	Peak747	471	1	340	9	256	1
gRNA39507	Peak1707	1141	6	494	2	719	13
gRNA8822	Peak357	1782	27	1016	17	1940	15
gRNA31366	Peak1352	197	1	32	1	80	1
gRNA27611	Peak1162	4871	44	2880	30	3431	26
gRNA14223	Peak579	1821	14	1535	12	2228	15
gRNA13570	Peak552	1355	26	570	17	1034	12
gRNA11460	Peak468	205	1	42	1	526	2
gRNA4543	Peak195	235	0	28	0	540	2
gRNA3809	Peak167	1551	50	1483	61	1341	54
gRNA28028	Peak1184	80	0	8	1	0	0
gRNA2144	Peak86	353	16	180	1	498	1
gRNA860	Peak27	1627	16	1271	2082	1090	19
gRNA26318	Peak1097	2517	24	3348	28	2883	27
gRNA8844	Peak358	175	1	98	3	124	0
gRNA6962	Peak287	1457	4	835	7	930	3
gRNA15022	Peak618	1484	3	565	8	1301	7
gRNA39527	Peak1707	588	3	333	7	698	9
gRNA17525	Peak729	252	3	721	2	52	1
gRNA22304	Peak912	305	10	209	2	349	5
gRNA35467	Peak1540	16286	136	13205	148	14919	138
gRNA17441	Peak727	954	5	1140	14	788	10
gRNA12332	Peak503	3201	62	2682	43	2668	83
gRNA29133	Peak1232	5430	40	3988	53	5701	56
gRNA27983	Peak1182	989	13	864	0	324	15
gRNA29393	Peak1243	4482	49	3834	34	10659	38
gRNA37927	Peak1638	175	6	23	0	190	1
gRNA20669	Peak858	809	3	1094	2	681	3
gRNA23612	Peak964	148	0	17	0	219	2
gRNA17579	Peak731	327	7	775	13	467	6
gRNA37561	Peak1623	1027	4	357	13	1050	8
gRNA29788	Peak1266	266	0	37	1	113	0
gRNA4052	Peak177	1610	18	1568	1842	2259	21
gRNA17697	Peak735	94	1	35	0	312	6
gRNA17924	Peak742	983	6	1336	5	754	7
gRNA22949	Peak936	1044	14	912	14	1336	17
gRNA24454	Peak1009	171	0	79	0	146	2
gRNA32984	Peak1423	743	5	262	9	1264	11
gRNA8914	Peak363	57	3	30	1	264	2
gRNA33878	Peak1460	21	0	6	0	5	2
gRNA23367	Peak955	213	1	36	0	19	0
gRNA8011	Peak325	371	2	129	2	215	1
gRNA22148	Peak904	433	1	109	2	392	4
gRNA11322	Peak462	1050	4222	1227	1670	1112	6841
gRNA33133	Peak1429	752	9	495	4	970	11
gRNA35676	Peak1548	1085	14	711	8	1829	13
gRNA10441	Peak431	2260	12	2107	10	1245	14
gRNA18297	Peak752	328	1	47	2	170	1
gRNA14639	Peak598	1133	133	345	7	1158	5
gRNA5061	Peak212	831	3	382	8	1236	2
gRNA15834	Peak649	5045	24	5039	33	3485	27
gRNA7859	Peak317	324	4	65	4	426	3
gRNA19036	Peak778	97	1	21	0	202	0
gRNA2206	Peak89	242	7	46	2	118	0
gRNA19306	Peak795	457	12	580	4	408	6
gRNA28733	Peak1218	4494	23	1724	56	3084	37
gRNA24737	Peak1022	1796	15	814	15	1762	1142
gRNA31693	Peak1362	1257	14028	917	15801	905	10327
gRNA6947	Peak287	1042	7	712	17	864	9
gRNA27940	Peak1180	50	0	34	0	1	1
gRNA24670	Peak1019	2688	43	2021	2238	3752	35
gRNA4303	Peak185	1567	27	674	22	1220	1925
gRNA5250	Peak221	1947	905	1975	17	1533	7
gRNA9594	Peak397	849	5	912	7	566	4
gRNA37013	Peak1604	1464	9	507	12	1850	4
gRNA11864	Peak484	225	1	95	0	638	4
gRNA7194	Peak290	5865	66	3392	95	7039	700
gRNA24313	Peak1001	536	104	195	113	369	95
gRNA22541	Peak921	1067	2	593	5	1040	6
gRNA2359	Peak95	677	0	656	2	770	6
gRNA4283	Peak184	24	5	5	0	1	0
gRNA1617	Peak61	978	5	355	5	742	9
gRNA37377	Peak1616	72	0	14	0	77	0
gRNA9146	Peak374	6379	66	7137	52	9565	74
gRNA26921	Peak1125	147	2	29	0	30	0
gRNA12338	Peak503	1061	20	759	1349	843	31
gRNA7452	Peak298	4386	41	2017	48	2389	38
gRNA23065	Peak941	149	0	126	2	62	1
gRNA16960	Peak698	420	4	272	4	584	618
gRNA11482	Peak469	176	2	259	5	27	2
gRNA15433	Peak634	47	1	16	0	45	0
gRNA39641	Peak1716	1608	9	2190	11	1916	8
gRNA6008	Peak253	957	9	877	4	697	7
gRNA37151	Peak1609	405	3	170	5	364	1
gRNA27608	Peak1161	5274	104	5301	56	5550	60
gRNA39085	Peak1685	1125	9	789	6	1019	10
gRNA21646	Peak887	9769	913	6069	61	8616	88
gRNA9449	Peak386	1261	619	813	714	678	2085
gRNA29949	Peak1277	424	2	109	9	213	11
gRNA39267	Peak1693	1762	19	1636	8	1512	14
gRNA28523	Peak1207	1256	6	406	5	461	7
gRNA21068	Peak873	1895	19	2008	24	1618	27
gRNA5925	Peak248	2695	47	2237	21	2710	15
gRNA3036	Peak126	897	3598	1050	2477	1156	2021
gRNA20298	Peak842	1042	9757	723	11631	1503	5420
gRNA696	Peak20	296	8	211	0	404	2
gRNA32120	Peak1376	770	5	473	9	725	6
gRNA16130	Peak663	166	0	66	1	121	0
gRNA8088	Peak329	371	1	340	5	166	6
gRNA21031	Peak871	1266	3	1163	7	732	11
gRNA20662	Peak858	470	4	917	3	563	3
gRNA39443	Peak1704	1730	25	781	14	1249	17
gRNA12447	Peak508	1040	10	734	2	315	11
gRNA35688	Peak1548	1563	7	766	9	816	11
gRNA22225	Peak907	1220	4582	1223	2387	601	2349
gRNA17560	Peak730	172	0	562	1	216	0
gRNA38856	Peak1679	1831	2278	2575	902	2313	36
gRNA9421	Peak385	1466	15	1323	19	1718	11
gRNA12124	Peak494	2112	16	1416	21	2053	34
gRNA7986	Peak324	1495	26	1004	15	1793	9
gRNA35534	Peak1544	2171	3223	1674	3014	1459	11819
gRNA7656	Peak308	211	1	321	0	41	1
gRNA7875	Peak318	1624	16	862	11	1576	19
gRNA13679	Peak557	1942	18	2243	16	1345	16
gRNA2632	Peak107	1797	15	1762	21	1495	13
gRNA11130	Peak457	2977	25	3764	44	3124	68
gRNA21691	Peak889	0	0	62	1	7	1
gRNA22912	Peak935	783	6	704	1	734	9
gRNA26631	Peak1112	3720	1409	2202	39	3924	55
gRNA9490	Peak388	83	137	39	0	19	0
gRNA39305	Peak1694	1065	5	871	10	851	6
gRNA3234	Peak137	1021	275	317	3081	1041	765
gRNA21053	Peak872	425	0	151	4	572	4
gRNA22980	Peak936	132	1	38	0	368	1
gRNA32749	Peak1414	1032	9	1187	6	495	8
gRNA34204	Peak1476	753	5	528	7	380	7
gRNA3554	Peak154	852	9	1255	5	764	9
gRNA10307	Peak429	208	0	25	0	62	0
gRNA29274	Peak1238	379	3	755	4	617	0
gRNA25050	Peak1035	1497	2	521	18	711	13
gRNA3430	Peak146	1037	1	480	5	579	7
gRNA6011	Peak253	691	174	679	181	1072	159
gRNA20331	Peak844	899	5	642	5	598	11
gRNA17704	Peak735	2	0	8	0	0	0
gRNA14105	Peak575	2471	2945	2292	48	3691	35
gRNA6580	Peak277	2005	1649	1989	27	1466	5514
gRNA26859	Peak1124	1086	9	671	12	809	2180
gRNA37703	Peak1627	102	1	67	1	107	0
gRNA24800	Peak1025	501	4	553	2	452	2
gRNA23822	Peak972	648	2	315	5	766	8
gRNA1656	Peak63	1201	6	875	9	1023	14
gRNA23838	Peak972	287	4	29	17	259	9
gRNA11127	Peak457	7	0	29	0	3	0
gRNA16768	Peak688	215	0	68	0	190	1
gRNA17480	Peak728	1272	17	713	10	777	12
gRNA39796	Peak1721	300	0	138	2	227	0
gRNA21061	Peak872	377	6	421	5	241	5
gRNA9777	Peak407	1791	6	1514	12	1166	13
gRNA36974	Peak1602	507	7	1687	3	490	6
gRNA9812	Peak408	1533	7	2213	17	2617	20
gRNA19235	Peak791	132	0	46	4	177	2
gRNA24828	Peak1026	382	2	504	1	185	2
gRNA26903	Peak1124	707	3	19	2	247	4
gRNA4982	Peak210	333	1	106	2	291	1
gRNA18814	Peak771	664	6	382	12	189	4
gRNA18047	Peak744	1165	5	332	9	1286	5
gRNA1856	Peak71	381	9	263	2	358	1
gRNA24704	Peak1020	1780	13	664	19	1565	15
gRNA34973	Peak1523	495	9	546	11	631	18
gRNA24809	Peak1025	39	1	107	0	115	1
gRNA2615	Peak107	207	1	366	1	65	3
gRNA32947	Peak1421	407	3	66	5	963	1
gRNA3465	Peak148	1187	13	1293	6	1672	13
gRNA2357	Peak95	2307	22	2837	1167	1525	18
gRNA8610	Peak352	367	8	81	0	515	4
gRNA16126	Peak663	0	0	0	0	0	0
gRNA21815	Peak894	951	6	426	2	649	6
gRNA18649	Peak763	4148	333	3456	40	3229	48
gRNA20226	Peak840	2980	23	2068	23	3240	20
gRNA31788	Peak1364	531	2	453	4	348	3
gRNA2518	Peak103	677	11	456	2068	697	7
gRNA9266	Peak378	350	5	109	8	355	0
gRNA37827	Peak1632	3436	14	2599	25	2724	33
gRNA33849	Peak1459	1148	3	577	5	592	5
gRNA26561	Peak1108	793	4	1010	5	474	5
gRNA34891	Peak1520	849	20	971	13	942	2
gRNA23101	Peak942	265	3	380	2	622	4
gRNA19937	Peak827	754	5	462	4	932	8
gRNA35092	Peak1529	577	4	148	6	857	4
gRNA31194	Peak1345	828	7720	1509	36	456	3284
gRNA10760	Peak443	514	5	277	539	442	3
gRNA3140	Peak133	400	1	87	1	199	3
gRNA34601	Peak1500	209	2	77	1	270	2
gRNA18520	Peak759	11025	1245	12551	194	12494	320
gRNA36420	Peak1585	1177	17	572	161	1002	13
gRNA19251	Peak793	5822	62	3850	43	4637	44
gRNA38467	Peak1665	11	0	36	0	57	1
gRNA39525	Peak1707	775	2	470	4	440	6
gRNA28678	Peak1216	2068	12	1487	12	1702	10
gRNA34779	Peak1514	243	7	365	1	242	1
gRNA1774	Peak69	279	7	309	7	484	2
gRNA31440	Peak1354	2467	16	1382	14	1688	14
gRNA9729	Peak405	2659	23	3560	15	3133	20
gRNA38810	Peak1678	1301	3	886	4	796	7
gRNA11161	Peak458	368	6	94	2	453	4
gRNA37658	Peak1626	3064	26	2956	27	4691	28
gRNA9228	Peak377	1026	2323	1248	1600	990	886
gRNA6239	Peak264	802	6	385	4	748	4
gRNA39579	Peak1713	251	3	92	2	47	5
gRNA24285	Peak1000	422	6	1635	6	875	1
gRNA4963	Peak210	207	0	24	1	139	1
gRNA18172	Peak749	4657	38	5709	28	4421	43
gRNA1337	Peak47	2018	19	783	6	1728	8
gRNA8665	Peak353	4385	28	2563	33	2746	30
gRNA30030	Peak1282	207	1	101	0	11	0
gRNA859	Peak27	6716	68	4861	70	9835	58
gRNA16700	Peak685	2042	17	3304	27	2757	17
gRNA34956	Peak1523	1703	32	1514	14	1747	25
gRNA29819	Peak1268	1365	4	582	4	821	4
gRNA11873	Peak484	3547	20	1965	33	2701	603
gRNA26475	Peak1105	668	18	584	4	412	5
gRNA5030	Peak211	628	5	663	1	478	5
gRNA17992	Peak744	4927	23	3852	30	4313	38
gRNA2165	Peak87	1091	16	1370	13	965	5
gRNA27937	Peak1179	3750	31	3458	31	2992	21
gRNA4901	Peak208	2961	26	4037	23	3737	28
gRNA19576	Peak814	129	1	333	2	455	2
gRNA11517	Peak470	281	1	120	0	210	1
gRNA16637	Peak682	2183	18	2378	31	3774	21
gRNA29343	Peak1241	800	8	375	6	721	8
gRNA11129	Peak457	752	4	200	0	416	4
gRNA18266	Peak752	479	4	395	4	347	2
gRNA26351	Peak1097	4118	52	6269	1109	4101	37
gRNA2471	Peak101	3270	30	2923	43	2694	23
gRNA7461	Peak299	829	7	479	6	1048	8
gRNA11641	Peak477	714	4	2218	10	581	7
gRNA24679	Peak1020	514	1	105	1	441	4
gRNA20440	Peak847	6111	46	3427	1341	4875	43
gRNA24163	Peak990	830	8	850	9	659	13
gRNA11374	Peak464	62	2	219	1	128	0
gRNA8409	Peak345	278	15	189	7	261	5
gRNA39338	Peak1698	948	14	235	7	1234	4
gRNA101	Peak3	783	3513	486	13	567	15
gRNA1708	Peak66	448	13	359	4	741	5
gRNA21795	Peak894	55	0	4	0	64	1
gRNA25350	Peak1049	2468	7481	2158	7259	3007	25280
gRNA31340	Peak1352	1165	10	446	13	1008	4
gRNA17814	Peak738	2158	12	2743	26	2509	23
gRNA24752	Peak1022	929	2	291	4	847	7
gRNA28651	Peak1214	11758	79	11668	107	9049	87
gRNA34399	Peak1487	570	12482	304	6153	626	2806
gRNA3696	Peak162	520	1	102	5	334	4
gRNA26618	Peak1111	3337	24	4984	37	5691	21
gRNA21275	Peak879	404	1439	341	1047	487	1606
gRNA19977	Peak829	2619	8	1400	11	1645	26
gRNA23081	Peak942	313	2	236	1	362	1
gRNA18569	Peak760	432	2	261	4	489	5
gRNA38739	Peak1675	572	2	489	5	571	5
gRNA26984	Peak1129	402	2	455	3	197	2
gRNA561	Peak17	11052	97	12034	103	12411	94
gRNA18207	Peak750	4330	47	2736	33	4779	38
gRNA20896	Peak865	2148	24	1928	16	2441	27
gRNA35241	Peak1533	2445	2601	2249	9895	2004	6368
gRNA4946	Peak209	702	4	211	3	274	1
gRNA2938	Peak122	208	1	126	2	47	1
gRNA27476	Peak1156	984	4	300	3	657	1
gRNA2849	Peak119	117	1	90	2	522	3
gRNA29447	Peak1246	556	5	781	1	231	4
gRNA6673	Peak280	1064	3	718	6	1493	7
gRNA9043	Peak370	3722	49	3923	38	4131	38
gRNA27563	Peak1160	2291	24	1301	13	2467	19
gRNA29501	Peak1249	721	5	923	3	789	8
gRNA12591	Peak512	486	4	593	4	553	3
gRNA31623	Peak1360	398	1	237	4	449	7
[truncated: 7,234 more rows]
