# Supplementary material for: Epigenomic profiling of glucocorticoid responses identifies cis-regulatory disruptions impacting steroid resistance in childhood acute lymphoblastic leukemia
Source: Leukemia. Author manuscript; Available in PMC 2022 Oct 4. (PMC9522591; doi:10.1038/s41375-022-01685-z)
Supplement: 1833642_Sup_Tab_6 [file NIHMS1833642-supplement-1833642_Sup_Tab_6.xlsx]

## Sheet: Supplementary Table 6
Supplementary Table 6. 697 CRISPRi-enriched sites of GR occupancy
Peak No	chr	start	stop	Pos logFC
Peak559	chr17	54756570	54756670	7.0658
Peak1494	chr8	99793704	99794017	5.1135
Peak599	chr18	19393338	19393536	3.9098
Peak881	chr20	62824570	62824670	3.8088
Peak1622	chr9	139651872	139652005	3.6318
Peak1430	chr7	158032434	158032534	3.4065
Peak343	chr12	99959412	99959570	3.2176
Peak1070	chr4	90211940	90212182	3.1025
Peak677	chr19	39333178	39333335	2.9382
Peak545	chr17	16873713	16873898	2.8009
Peak983	chr3	148860560	148860717	2.7728
Peak219	chr11	19060291	19060505	2.7672
Peak338	chr12	94190703	94190863	2.7655
Peak393	chr13	80809696	80809893	2.68
Peak151	chr10	19243823	19243923	2.6509
Peak333	chr12	92975018	92975169	2.6154
Peak359	chr13	19919170	19919270	2.5942
Peak596	chr18	11565313	11565521	2.539
Peak500	chr16	51186227	51186327	2.3998
Peak499	chr16	49372906	49373084	2.3813
Peak1315	chr6	119854861	119854994	2.3375
Peak56	chr1	85247875	85247975	2.3126
Peak347	chr12	122205682	122205867	2.2407
Peak1550	chr9	13967594	13967812	2.2325
Peak1221	chr5	165510712	165510933	2.1882
Peak647	chr19	2710567	2710724	2.1596
Peak627	chr18	60845817	60846111	2.0576
Peak1345	chr6	159192297	159192517	2.0256
Peak739	chr2	49167826	49168071	1.9954
Peak1155	chr5	64338734	64338941	1.9693
Peak1610	chr9	116821099	116821199	1.9329
Peak1136	chr5	33299989	33300243	1.9284
Peak392	chr13	80707689	80707789	1.9198
Peak1332	chr6	143036780	143036966	1.8969
Peak238	chr11	79053871	79054010	1.8764
Peak1040	chr4	26782252	26782476	1.8444
Peak614	chr18	43036104	43036337	1.8409
Peak767	chr2	134326109	134326209	1.8162
Peak1497	chr8	100714801	100715067	1.7986
Peak1069	chr4	89802392	89802683	1.78
Peak240	chr11	79080077	79080239	1.767
Peak1493	chr8	99792838	99793137	1.7365
Peak561	chr17	54827431	54827657	1.7005
Peak169	chr10	54226355	54226513	1.6953
Peak390	chr13	76081731	76082002	1.6641
Peak740	chr2	58077973	58078106	1.6499
Peak1006	chr3	188692725	188692878	1.6399
Peak816	chr2	236443317	236443554	1.6356
Peak591	chr18	452906	453146	1.6347
Peak1625	chr9	140277869	140278143	1.6343
Peak977	chr3	141971640	141971853	1.6025
Peak254	chr11	132450996	132451217	1.5917
Peak1632	chrX	9735449	9735628	1.5773
Peak1603	chr9	107900797	107901167	1.5538
Peak32	chr1	57784987	57785223	1.5433
Peak1346	chr6	160250592	160250826	1.5414
Peak1302	chr6	110881959	110882146	1.5378
Peak1213	chr5	154783145	154783245	1.5319
Peak133	chr1	243658282	243658460	1.5086
Peak1317	chr6	130436210	130436448	1.5018
Peak1668	chrX	102114193	102114410	1.5011
Peak1505	chr8	105817208	105817430	1.4905
Peak612	chr18	42504022	42504218	1.4895
Peak1099	chr4	151000229	151000329	1.4864
Peak1517	chr8	124934440	124934611	1.4765
Peak1288	chr6	106995512	106995622	1.4693
Peak299	chr12	14863979	14864144	1.4588
Peak506	chr16	66209625	66209824	1.4507
Peak1333	chr6	143037358	143037534	1.4435
Peak1646	chrX	39098389	39098660	1.43
Peak1375	chr7	7759033	7759232	1.4278
Peak374	chr13	41962708	41963009	1.4275
Peak1470	chr8	67247037	67247205	1.4237
Peak1508	chr8	105880267	105880404	1.4191
Peak766	chr2	134325974	134326074	1.4056
Peak788	chr2	169568703	169568898	1.4051
Peak814	chr2	228269398	228269583	1.3959
Peak1314	chr6	119468629	119468833	1.3907
Peak836	chr20	13280240	13280448	1.379
Peak616	chr18	43387230	43387486	1.3689
Peak1173	chr5	94513912	94514374	1.3651
Peak1691	chrX	132515330	132515573	1.3571
Peak231	chr11	70283229	70283461	1.3565
Peak993	chr3	161566560	161566660	1.3453
Peak735	chr2	45464343	45464557	1.3398
Peak462	chr15	74148901	74149165	1.3342
Peak266	chr12	2841562	2841749	1.3255
Peak1713	chrX	149577577	149577784	1.314
Peak42	chr1	64169377	64169567	1.3073
Peak1120	chr4	185435643	185435743	1.2932
Peak611	chr18	42182915	42183188	1.2882
Peak272	chr12	3207092	3207293	1.2759
Peak960	chr3	76432878	76433138	1.2742
Peak1438	chr8	19296033	19296300	1.2718
Peak27	chr1	42231733	42232005	1.2705
Peak886	chr21	27204274	27204515	1.2661
Peak48	chr1	67779781	67779941	1.2588
Peak1269	chr6	89255076	89255238	1.242
Peak997	chr3	162316431	162316592	1.2409
Peak1028	chr4	22671174	22671346	1.2374
Peak1334	chr6	149093168	149093388	1.2338
Peak1564	chr9	38690815	38691018	1.2315
Peak1422	chr7	137379292	137379474	1.2299
Peak1359	chr6	167609450	167609550	1.224
Peak376	chr13	42972789	42973055	1.2237
Peak772	chr2	140038852	140039032	1.2211
Peak395	chr13	80882558	80882658	1.1977
Peak1354	chr6	167050552	167050738	1.197
Peak1041	chr4	36510128	36510289	1.192
Peak101	chr1	201110328	201110599	1.1864
Peak1192	chr5	127716401	127716661	1.177
Peak934	chr3	14291596	14291776	1.1711
Peak24	chr1	41367790	41368124	1.1706
Peak1015	chr4	4408635	4408820	1.1671
Peak670	chr19	36294652	36294931	1.1663
Peak691	chr19	55933465	55933697	1.1657
Peak824	chr20	3633653	3633788	1.1509
Peak36	chr1	57888130	57888230	1.1289
Peak1054	chr4	42154507	42154650	1.1214
Peak433	chr14	100317135	100317393	1.1081
Peak1487	chr8	81058991	81059435	1.1065
Peak1146	chr5	56032040	56032236	1.1051
Peak1418	chr7	100396800	100397182	1.1042
Peak810	chr2	217787135	217787296	1.1022
Peak491	chr16	10772610	10772768	1.0948
Peak1663	chrX	73640243	73640369	1.0763
Peak759	chr2	129047142	129047313	1.0687
Peak522	chr16	87669826	87670143	1.0659
Peak1399	chr7	44013319	44013435	1.0622
Peak1626	chr9	140285009	140285259	1.062
Peak85	chr1	167078502	167078742	1.051
Peak623	chr18	57503300	57503479	1.0404
Peak938	chr3	34377355	34377544	1.0371
Peak538	chr17	2041620	2041939	1.0369
Peak782	chr2	158898824	158899003	1.0362
Peak896	chr22	17915080	17915337	1.0303
Peak633	chr18	71629559	71629785	1.0157
Peak342	chr12	94957155	94957421	1.013
Peak837	chr20	15775063	15775222	1.0118
Peak1432	chr7	158983987	158984247	1.0113
Peak1539	chr8	145726338	145726438	1.0018
Peak774	chr2	145427617	145427925	0.99949
Peak1465	chr8	60197572	60197734	0.99918
Peak182	chr10	92048891	92049127	0.9959
Peak185	chr10	100006912	100007156	0.99526
Peak157	chr10	34659148	34659423	0.99329
Peak1118	chr4	184263993	184264202	0.99319
Peak1616	chr9	134103488	134103862	0.99313
Peak123	chr1	231860693	231860961	0.98595
Peak1337	chr6	149929772	149929998	0.9809
Peak916	chr22	40711527	40711701	0.97486
Peak974	chr3	138297006	138297327	0.97371
Peak876	chr20	62245969	62246217	0.96899
Peak46	chr1	64387366	64387622	0.96453
Peak1390	chr7	29359711	29359988	0.9644
Peak865	chr20	43214202	43214486	0.95816
Peak174	chr10	73759659	73759815	0.9517
Peak153	chr10	19292263	19292499	0.93863
Peak1416	chr7	98400012	98400187	0.93034
Peak1298	chr6	109793605	109793739	0.92711
Peak626	chr18	60812040	60812248	0.92638
Peak1543	chr9	3809811	3810079	0.92567
Peak932	chr3	14290396	14290496	0.92176
Peak283	chr12	6715586	6715990	0.92006
Peak450	chr15	45664688	45664884	0.91616
Peak1357	chr6	167257105	167257339	0.9122
Peak1031	chr4	24975640	24975778	0.90531
Peak770	chr2	134348861	134349108	0.90353
Peak397	chr13	86115728	86115906	0.88965
Peak161	chr10	44812374	44812680	0.88394
Peak177	chr10	84151066	84151404	0.87934
Peak1343	chr6	157041051	157041417	0.87757
Peak362	chr13	22523262	22523452	0.87193
Peak186	chr10	100080686	100081001	0.86905
Peak495	chr16	22723334	22723514	0.86348
Peak61	chr1	89954699	89954932	0.85935
Peak1230	chr6	3349194	3349339	0.85648
Peak529	chr17	202578	202782	0.85195
Peak1241	chr6	21751829	21752096	0.85009
Peak827	chr20	4306882	4307078	0.84127
Peak1125	chr5	2537773	2537994	0.83804
Peak1191	chr5	127716194	127716294	0.83627
Peak1647	chrX	39764500	39764600	0.83472
Peak898	chr22	17977518	17977757	0.83178
Peak809	chr2	216848320	216848544	0.82558
Peak180	chr10	87779023	87779235	0.82546
Peak348	chr12	122256696	122256960	0.81737
Peak1234	chr6	11628861	11629174	0.8131
Peak1141	chr5	35173388	35173578	0.80798
Peak142	chr10	5533376	5533476	0.80351
Peak269	chr12	3182745	3182911	0.80339
Peak149	chr10	18871575	18871996	0.80219
Peak1701	chrX	135353605	135353778	0.8007
Peak674	chr19	36980529	36980785	0.80029
Peak1073	chr4	103090572	103090731	0.79556
Peak1044	chr4	38087038	38087245	0.79069
Peak165	chr10	46962569	46962670	0.78732
Peak737	chr2	45950185	45950474	0.78577
Peak979	chr3	143488588	143488866	0.78211
Peak926	chr3	4468447	4468800	0.77866
Peak1058	chr4	68343078	68343330	0.77715
Peak541	chr17	4400602	4400823	0.77317
Peak372	chr13	37123994	37124206	0.77213
Peak1258	chr6	52217290	52217472	0.76132
Peak1547	chr9	4207933	4208271	0.75951
Peak635	chr18	77615075	77615310	0.75324
Peak1427	chr7	146750959	146751120	0.75228
Peak668	chr19	36258675	36258872	0.74398
Peak1387	chr7	18560092	18560559	0.7414
Peak659	chr19	14460425	14460525	0.74062
Peak162	chr10	45390862	45391016	0.73267
Peak309	chr12	40066851	40067117	0.73242
Peak733	chr2	42200170	42200435	0.72494
Peak941	chr3	36933189	36933416	0.72321
Peak768	chr2	134348105	134348333	0.71963
Peak1585	chr9	83988247	83988513	0.71937
Peak154	chr10	26978470	26978669	0.71605
Peak171	chr10	72523100	72523467	0.71517
Peak1109	chr4	157118353	157118507	0.7146
Peak1535	chr8	144725209	144725458	0.70942
Peak1342	chr6	156452447	156452599	0.70801
Peak1186	chr5	118011472	118011676	0.70689
Peak1703	chrX	147462345	147462445	0.69941
Peak1534	chr8	144724530	144724837	0.69736
Peak1147	chr5	56032969	56033214	0.69473
Peak250	chr11	109940241	109940410	0.69468
Peak1108	chr4	156529784	156529989	0.69299
Peak147	chr10	11779624	11779823	0.69104
Peak44	chr1	64239482	64239678	0.68969
Peak1045	chr4	38754067	38754445	0.68933
Peak913	chr22	35971375	35971623	0.68759
Peak520	chr16	87669211	87669311	0.6715
Peak402	chr13	99274399	99274658	0.66866
Peak1117	chr4	182580493	182580669	0.66214
Peak1350	chr6	160400249	160400466	0.66153
Peak678	chr19	47295245	47295456	0.65765
Peak166	chr10	49842481	49842646	0.65633
Peak476	chr15	99708016	99708211	0.64916
Peak209	chr11	12311824	12312045	0.64844
Peak1450	chr8	35443846	35444066	0.6462
Peak399	chr13	89590331	89590570	0.64569
Peak776	chr2	152172260	152172569	0.64359
Peak1231	chr6	4373243	4373462	0.64238
Peak1482	chr8	75459405	75459629	0.63651
Peak624	chr18	57549403	57549706	0.63241
Peak1341	chr6	156336597	156336823	0.6266
Peak494	chr16	15644997	15645186	0.62637
Peak546	chr17	25728717	25728921	0.6261
Peak1554	chr9	16290447	16290547	0.61823
Peak1611	chr9	116821860	116822057	0.61493
Peak1265	chr6	84761911	84762113	0.61413
Peak1563	chr9	38643308	38643517	0.61351
Peak1036	chr4	25972474	25972616	0.60957
Peak859	chr20	36597339	36597619	0.60746
Peak8	chr1	3647092	3647288	0.60173
Peak723	chr2	22040988	22041277	0.60145
Peak575	chr17	76409058	76409393	0.60064
Peak1692	chrX	132815570	132815759	0.59669
Peak1232	chr6	6168781	6169040	0.5906
Peak193	chr10	116273872	116274125	0.58962
Peak542	chr17	10025783	10025976	0.58619
Peak884	chr21	26782418	26782815	0.57919
Peak1538	chr8	145725924	145726024	0.57767
Peak525	chr16	88701114	88701294	0.5759
Peak1294	chr6	107871819	107871922	0.57419
Peak323	chr12	68989120	68989303	0.56699
Peak14	chr1	11902314	11902565	0.56542
Peak636	chr19	669180	669360	0.5652
Peak93	chr1	183551204	183551461	0.56412
Peak1471	chr8	67461162	67461405	0.55658
Peak1239	chr6	17740870	17741037	0.5541
Peak1307	chr6	112013645	112013745	0.54519
Peak1391	chr7	30195101	30195398	0.54295
Peak1426	chr7	146750438	146750538	0.54068
Peak234	chr11	78632501	78632855	0.53917
Peak130	chr1	243174082	243174209	0.53811
Peak1062	chr4	76106367	76106559	0.53094
Peak1709	chrX	149386790	149386890	0.5264
Peak1327	chr6	134838540	134838759	0.52629
Peak1466	chr8	61880075	61880298	0.52152
Peak757	chr2	122913805	122913980	0.51918
Peak605	chr18	31434165	31434448	0.51191
Peak1	chr1	2034806	2035012	0.51113
Peak444	chr15	27895442	27895658	0.51063
Peak652	chr19	3854322	3854516	0.50712
Peak1074	chr4	103495515	103495749	0.5063
Peak1338	chr6	150525894	150526092	0.50613
Peak927	chr3	4862470	4862663	0.50254
Peak1135	chr5	32505406	32505573	0.49821
Peak726	chr2	29224085	29224241	0.49808
Peak364	chr13	23025425	23025702	0.49645
Peak608	chr18	31452991	31453392	0.49144
Peak1424	chr7	142510101	142510310	0.48309
Peak159	chr10	35069898	35070163	0.48018
Peak834	chr20	12478751	12479072	0.47974
Peak1672	chrX	118126617	118126933	0.47832
Peak825	chr20	3633954	3634286	0.47592
Peak1021	chr4	8046549	8046710	0.47421
Peak68	chr1	120165070	120165268	0.47307
Peak747	chr2	75071185	75071369	0.46633
Peak328	chr12	77097727	77097981	0.46417
Peak422	chr14	46956737	46956902	0.45718
Peak387	chr13	59964092	59964287	0.45681
Peak184	chr10	98176462	98176754	0.45562
Peak471	chr15	83501421	83501557	0.45425
Peak300	chr12	15037588	15037819	0.44926
Peak1429	chr7	155754475	155754718	0.44858
Peak242	chr11	86133000	86133203	0.44421
Peak727	chr2	31376131	31376354	0.4435
Peak1138	chr5	34752404	34752656	0.44033
Peak897	chr22	17915559	17915894	0.43986
Peak1722	chrX	153923039	153923303	0.43371
Peak950	chr3	48699032	48699290	0.4337
Peak43	chr1	64179964	64180183	0.42981
Peak1356	chr6	167052024	167052307	0.42929
Peak1604	chr9	108640100	108640280	0.4286
Peak654	chr19	6042064	6042244	0.42805
Peak922	chr22	50657989	50658174	0.42749
Peak963	chr3	117020755	117021007	0.4268
Peak1609	chr9	116820887	116821035	0.4257
Peak326	chr12	72917581	72917793	0.42362
Peak332	chr12	90546985	90547248	0.42277
Peak1037	chr4	26090256	26090469	0.42264
Peak181	chr10	91548912	91549145	0.42205
Peak1371	chr7	2114344	2114563	0.41986
Peak1502	chr8	105601296	105601396	0.41569
Peak1555	chr9	17216133	17216342	0.40927
Peak948	chr3	47018368	47018468	0.40916
Peak409	chr13	111039909	111040096	0.40693
Peak469	chr15	81116447	81116652	0.39551
Peak211	chr11	14433557	14433808	0.39525
Peak732	chr2	42106527	42106721	0.39493
Peak1370	chr7	2113180	2113459	0.38828
Peak736	chr2	45465356	45465685	0.386
Peak1203	chr5	142513100	142513388	0.38242
Peak1698	chrX	135292491	135292801	0.38223
Peak38	chr1	57889579	57889679	0.37828
Peak306	chr12	32702495	32702806	0.37578
Peak1540	chr8	146282730	146283073	0.36979
Peak1033	chr4	24976753	24976916	0.36775
Peak429	chr14	68968940	68969236	0.3648
Peak1394	chr7	38388821	38388921	0.35905
Peak1443	chr8	22246952	22247136	0.35762
Peak310	chr12	40618759	40618939	0.35099
Peak1105	chr4	152639178	152639430	0.34996
Peak305	chr12	25176769	25177077	0.34771
Peak288	chr12	6982399	6982886	0.34678
Peak1567	chr9	38708231	38708418	0.34296
Peak1140	chr5	35172062	35172368	0.33984
Peak976	chr3	141929906	141930091	0.33821
Peak115	chr1	226885413	226885615	0.33126
Peak373	chr13	41026403	41026687	0.33073
Peak1617	chr9	134388547	134388833	0.32982
Peak543	chr17	14508625	14508837	0.3258
Peak750	chr2	99402871	99403089	0.32447
Peak1481	chr8	75111505	75111658	0.32415
Peak458	chr15	66437971	66438251	0.32267
Peak1595	chr9	99180560	99180660	0.32148
Peak452	chr15	47799164	47799328	0.31822
Peak544	chr17	16302011	16302170	0.31819
Peak1002	chr3	171506361	171506643	0.31782
Peak728	chr2	31437019	31437486	0.31775
Peak1235	chr6	11788406	11788566	0.31124
Peak164	chr10	46962158	46962290	0.30887
Peak126	chr1	238144643	238144828	0.30871
Peak1403	chr7	47078276	47078485	0.30242
Peak803	chr2	197097808	197098006	0.29985
Peak1305	chr6	111897541	111897713	0.29969
Peak71	chr1	120255157	120255582	0.29841
Peak1340	chr6	155530207	155530355	0.29773
Peak609	chr18	35005235	35005504	0.29683
Peak405	chr13	99275279	99275520	0.29579
Peak284	chr12	6715992	6716157	0.29364
Peak631	chr18	71621556	71621812	0.29119
Peak760	chr2	129063244	129063500	0.2868
Peak1445	chr8	23161639	23161800	0.28313
Peak1656	chrX	65265907	65266195	0.28249
Peak1568	chr9	38708928	38709133	0.28206
Peak617	chr18	46043530	46043706	0.28117
Peak1104	chr4	151151796	151152046	0.27777
Peak673	chr19	36980177	36980492	0.26507
Peak820	chr2	240231151	240231300	0.26413
Peak1299	chr6	109793761	109793896	0.26249
Peak965	chr3	122818895	122819072	0.25884
Peak248	chr11	102557991	102558227	0.25454
Peak729	chr2	32650821	32651033	0.25361
Peak470	chr15	81125138	81125360	0.2521
Peak1257	chr6	51576900	51577091	0.25087
Peak885	chr21	27203716	27203993	0.24803
Peak664	chr19	30113196	30113296	0.24539
Peak667	chr19	36258092	36258247	0.24527
Peak1601	chr9	103170922	103171134	0.24462
Peak1623	chr9	139652786	139653001	0.23928
Peak866	chr20	43215045	43215226	0.2376
Peak981	chr3	144803979	144804156	0.23728
Peak1032	chr4	24976538	24976638	0.23666
Peak205	chr11	2337739	2337941	0.22939
Peak933	chr3	14290791	14291014	0.22556
Peak1704	chrX	149289646	149290040	0.22482
Peak45	chr1	64240310	64240410	0.22213
Peak1184	chr5	115374572	115374820	0.21738
Peak1602	chr9	107535028	107535283	0.21689
Peak1151	chr5	56741420	56741575	0.21646
Peak1699	chrX	135310258	135310449	0.21477
Peak1129	chr5	8417685	8417979	0.21458
Peak1267	chr6	88591323	88591523	0.21454
Peak524	chr16	88700450	88700680	0.21371
Peak1411	chr7	67846860	67847009	0.21263
Peak1569	chr9	38709401	38709501	0.2041
Peak1421	chr7	134284278	134284533	0.19981
Peak823	chr20	3633413	3633588	0.19876
Peak50	chr1	67780474	67780634	0.19805
Peak606	chr18	31451508	31451680	0.19407
Peak54	chr1	83261423	83261523	0.18969
Peak1185	chr5	117842173	117842504	0.18913
Peak58	chr1	86042313	86042483	0.18896
Peak1091	chr4	131733462	131733872	0.18887
Peak262	chr12	1387153	1387391	0.18841
Peak1094	chr4	139483931	139484154	0.18625
Peak6	chr1	2319437	2319661	0.18179
Peak689	chr19	55932778	55933002	0.18081
Peak1365	chr7	1068660	1068760	0.17848
Peak111	chr1	220944070	220944313	0.17363
Peak35	chr1	57888000	57888100	0.17239
Peak1460	chr8	53134841	53135067	0.16737
Peak277	chr12	3602423	3602798	0.16567
Peak1581	chr9	76953823	76954136	0.16358
Peak1331	chr6	139435985	139436113	0.1629
Peak396	chr13	80884155	80884316	0.15987
Peak1352	chr6	166928638	166928891	0.15681
Peak1266	chr6	88088745	88088976	0.15298
Peak958	chr3	73427450	73427702	0.14775
Peak296	chr12	12987409	12987736	0.14742
Peak124	chr1	235160461	235160633	0.14246
Peak289	chr12	7000127	7000560	0.14129
Peak64	chr1	105569394	105569608	0.14119
Peak80	chr1	154469576	154469823	0.1377
Peak1204	chr5	142563033	142563246	0.13551
Peak1224	chr5	171839945	171840249	0.1325
Peak1318	chr6	132395382	132395482	0.13107
Peak65	chr1	108087856	108088024	0.1301
Peak1476	chr8	75109925	75110257	0.12892
Peak339	chr12	94929537	94929726	0.12677
Peak1400	chr7	44013471	44013591	0.12532
Peak1670	chrX	118126083	118126258	0.12505
Peak808	chr2	210414477	210414661	0.12399
Peak704	chr2	8143845	8144130	0.11776
Peak1628	chr9	140639950	140640170	0.11658
Peak1449	chr8	33455041	33455402	0.11372
Peak680	chr19	49412771	49413038	0.11172
Peak523	chr16	88700263	88700417	0.10825
Peak1149	chr5	56738355	56738455	0.10639
Peak915	chr22	39764597	39764870	0.10402
Peak287	chr12	6981434	6981731	0.10396
Peak358	chr13	19919006	19919124	0.10156
Peak1336	chr6	149578954	149579145	0.10082
Peak1544	chr9	3850188	3850407	0.099956
Peak1455	chr8	41521319	41521526	0.099233
Peak1423	chr7	142334888	142335211	0.097566
Peak534	chr17	1026980	1027080	0.095649
Peak778	chr2	152622340	152622591	0.095452
Peak222	chr11	32410465	32410668	0.095032
Peak929	chr3	8996727	8997085	0.094619
Peak131	chr1	243277368	243277704	0.092358
Peak394	chr13	80881696	80881956	0.088998
Peak1509	chr8	106532801	106533033	0.088018
Peak1127	chr5	2664839	2665023	0.083688
Peak905	chr22	22516312	22516484	0.081271
Peak1527	chr8	140789400	140789660	0.077843
Peak1244	chr6	32653444	32653719	0.076304
Peak1444	chr8	22247597	22247808	0.076011
Peak434	chr14	106765224	106765498	0.074449
Peak1590	chr9	93697494	93697723	0.074056
Peak887	chr21	35392469	35392645	0.073989
Peak1681	chrX	129216239	129216559	0.073648
Peak1023	chr4	10966041	10966236	0.070158
Peak430	chr14	69186519	69186770	0.068586
Peak1661	chrX	73137157	73137406	0.064628
Peak989	chr3	155052705	155052900	0.06403
Peak1392	chr7	33958183	33958413	0.060019
Peak227	chr11	49539108	49539305	0.058136
Peak795	chr2	177864191	177864396	0.05616
Peak951	chr3	58992960	58993182	0.056114
Peak709	chr2	10565747	10566033	0.054403
Peak694	chr2	696456	696705	0.053744
Peak135	chr1	245373390	245373539	0.051376
Peak527	chr16	89803876	89804027	0.048192
Peak1208	chr5	149976532	149976786	0.047557
Peak1401	chr7	44013627	44013753	0.046918
Peak547	chr17	27411907	27412144	0.046557
Peak1098	chr4	150999943	151000043	0.046164
Peak1546	chr9	3952751	3952990	0.044589
Peak1488	chr8	81079613	81079893	0.039396
Peak1339	chr6	150635635	150635818	0.039285
Peak1035	chr4	25971869	25972142	0.035742
Peak895	chr21	48005555	48005944	0.035006
Peak1167	chr5	81094337	81094544	0.033909
Peak761	chr2	129230801	129231088	0.03282
Peak1500	chr8	101913999	101914189	0.032176
Peak1490	chr8	90255917	90256175	0.019997
Peak872	chr20	50575693	50575928	0.018297
Peak398	chr13	89589657	89589882	0.017287
Peak1469	chr8	67042526	67042705	0.014364
Peak1027	chr4	22609181	22609375	0.010075
Peak484	chr16	1812345	1812546	0.008972
Peak1013	chr4	1043492	1043700	0.007186
Peak440	chr14	106811863	106812041	0.0054994
Peak1463	chr8	56358265	56358451	0.0020343
Peak1700	chrX	135311022	135311290	0.0020068
