# Supplementary material for: Epigenomic profiling of glucocorticoid responses identifies cis-regulatory disruptions impacting steroid resistance in childhood acute lymphoblastic leukemia
Source: Leukemia. Author manuscript; Available in PMC 2022 Oct 4. (PMC9522591; doi:10.1038/s41375-022-01685-z)
Supplement: 1833642_Sup_Tab_7 [file NIHMS1833642-supplement-1833642_Sup_Tab_7.xlsx]

## Sheet: Supplementary Table 7
Supplementary Table 7. Nalm6 CRISPRi-enriched sites of GR occupancy
Peak No	chr	start	stop	Pos logFC
Peak785	chr2	165367150	165367250	12.822
Peak979	chr3	143488588	143488866	11.978
Peak126	chr1	238144643	238144828	8.6767
Peak1497	chr8	100714801	100715067	8.2649
Peak924	chr22	51167529	51167629	7.5502
Peak660	chr19	14511869	14512083	6.8075
Peak983	chr3	148860560	148860717	6.6924
Peak1101	chr4	151045105	151045351	6.6145
Peak417	chr13	114940209	114940428	6.5903
Peak1006	chr3	188692725	188692878	6.3712
Peak1130	chr5	14342455	14342555	5.8164
Peak653	chr19	3857879	3857979	5.7362
Peak620	chr18	56564162	56564422	5.5279
Peak1509	chr8	106532801	106533033	5.0842
Peak1339	chr6	150635635	150635818	5.0512
Peak753	chr2	105505593	105505850	4.9238
Peak655	chr19	9785416	9785516	4.6086
Peak601	chr18	30448493	30448686	4.4731
Peak1137	chr5	33686622	33686722	3.7803
Peak467	chr15	78933516	78933616	3.423
Peak989	chr3	155052705	155052900	3.3871
Peak854	chr20	33713564	33713781	3.2785
Peak1685	chrX	129970482	129970717	3.1957
Peak25	chr1	42230671	42230771	2.4334
Peak772	chr2	140038852	140039032	2.2544
Peak970	chr3	128202026	128202256	2.0648
Peak739	chr2	49167826	49168071	2.0277
Peak910	chr22	25676128	25676283	1.8986
Peak1390	chr7	29359711	29359988	1.8488
Peak1296	chr6	109438697	109438891	1.8132
Peak945	chr3	40002516	40002724	1.5846
Peak1197	chr5	133078206	133078306	1.5325
Peak1287	chr6	106994947	106995189	1.5228
Peak519	chr16	87662721	87662943	1.4733
Peak759	chr2	129047142	129047313	1.4329
Peak136	chr10	503759	503949	1.3989
Peak1487	chr8	81058991	81059435	1.3248
Peak515	chr16	86610852	86610952	1.3138
Peak1478	chr8	75110556	75110703	1.2996
Peak1655	chrX	65233354	65233635	1.2199
Peak1526	chr8	140788464	140788564	1.2128
Peak898	chr22	17977518	17977757	1.176
Peak1252	chr6	48005802	48005927	1.16
Peak1651	chrX	46570681	46570942	1.16
Peak855	chr20	34099099	34099275	1.1313
Peak614	chr18	43036104	43036337	1.0453
Peak577	chr17	78579196	78579296	0.99966
Peak250	chr11	109940241	109940410	0.95618
Peak1256	chr6	49304502	49304781	0.93036
Peak540	chr17	2839083	2839251	0.90426
Peak386	chr13	59379123	59379286	0.90354
Peak810	chr2	217787135	217787296	0.89938
Peak717	chr2	19157509	19157674	0.89835
Peak1190	chr5	124248956	124249056	0.87628
Peak240	chr11	79080077	79080239	0.85986
Peak1066	chr4	86412705	86412874	0.81715
Peak325	chr12	71748782	71748961	0.81538
Peak937	chr3	31503775	31504036	0.80774
Peak378	chr13	44999746	44999920	0.80765
Peak718	chr2	21330747	21330847	0.79402
Peak1710	chrX	149395664	149395835	0.76136
Peak1533	chr8	144684454	144684888	0.75358
Peak404	chr13	99275017	99275117	0.73827
Peak757	chr2	122913805	122913980	0.72374
Peak630	chr18	71529119	71529316	0.71989
Peak236	chr11	78885561	78885661	0.71845
Peak16	chr1	11908570	11908670	0.70001
Peak1211	chr5	154782738	154782976	0.6853
Peak301	chr12	25084711	25084911	0.6762
Peak780	chr2	153393320	153393420	0.65583
Peak797	chr2	178499760	178499959	0.65337
Peak154	chr10	26978470	26978669	0.64441
Peak1000	chr3	169049810	169049979	0.64169
Peak764	chr2	132399016	132399434	0.64103
Peak1613	chr9	129154646	129154797	0.63944
Peak1484	chr8	75896706	75896806	0.63788
Peak909	chr22	25227744	25227920	0.63696
Peak812	chr2	217954665	217955071	0.6296
Peak1475	chr8	74668411	74668597	0.62923
Peak1618	chr9	137584987	137585127	0.62745
Peak1486	chr8	75897343	75897503	0.62415
Peak195	chr10	117977966	117978132	0.61627
Peak880	chr20	62634795	62634971	0.59351
Peak374	chr13	41962708	41963009	0.59188
Peak1411	chr7	67846860	67847009	0.58963
Peak219	chr11	19060291	19060505	0.5822
Peak315	chr12	46038378	46038638	0.58077
Peak358	chr13	19919006	19919124	0.57462
Peak1428	chr7	151097860	151098083	0.56778
Peak1696	chrX	135279074	135279174	0.56677
Peak1434	chr8	3181865	3182085	0.56643
Peak175	chr10	82110105	82110320	0.55875
Peak1060	chr4	74469671	74469789	0.55847
Peak1185	chr5	117842173	117842504	0.55445
Peak1687	chrX	131614811	131615211	0.54635
Peak1247	chr6	36294433	36294601	0.52769
Peak488	chr16	3398692	3398972	0.51461
Peak276	chr12	3602009	3602166	0.513
Peak518	chr16	87655924	87656184	0.50885
Peak1173	chr5	94513912	94514374	0.50837
Peak1228	chr6	514573	514833	0.49888
Peak233	chr11	74032953	74033125	0.49811
Peak1080	chr4	124570145	124570344	0.49763
Peak146	chr10	8000481	8000643	0.49027
Peak1078	chr4	119487335	119487540	0.48871
Peak558	chr17	48849845	48849966	0.48486
Peak459	chr15	70272264	70272458	0.47401
Peak469	chr15	81116447	81116652	0.47203
Peak141	chr10	5533165	5533357	0.47164
Peak795	chr2	177864191	177864396	0.46796
Peak1626	chr9	140285009	140285259	0.45964
Peak1588	chr9	89190938	89191200	0.45304
Peak981	chr3	144803979	144804156	0.44557
Peak974	chr3	138297006	138297327	0.4441
Peak1153	chr5	59480492	59480716	0.44191
Peak1136	chr5	33299989	33300243	0.44026
Peak912	chr22	31955298	31955476	0.43692
Peak465	chr15	78933191	78933291	0.42463
Peak433	chr14	100317135	100317393	0.41857
Peak181	chr10	91548912	91549145	0.41843
Peak1680	chrX	129215941	129216041	0.4183
Peak46	chr1	64387366	64387622	0.40991
Peak461	chr15	70309024	70309199	0.40903
Peak88	chr1	175649232	175649443	0.40358
Peak390	chr13	76081731	76082002	0.40029
Peak1273	chr6	99380389	99380581	0.39964
Peak1141	chr5	35173388	35173578	0.3993
Peak650	chr19	3537706	3537880	0.39763
Peak1049	chr4	42031739	42031951	0.39679
Peak1232	chr6	6168781	6169040	0.39565
Peak768	chr2	134348105	134348333	0.38717
Peak224	chr11	45231559	45231659	0.37909
Peak1633	chrX	9736465	9736642	0.37071
Peak1423	chr7	142334888	142335211	0.3678
Peak860	chr20	40097900	40098070	0.36551
Peak831	chr20	9033892	9034088	0.3648
Peak1408	chr7	47872969	47873147	0.35729
Peak707	chr2	9331924	9332102	0.35385
Peak1720	chrX	153269819	153270039	0.34762
Peak1590	chr9	93697494	93697723	0.34671
Peak402	chr13	99274399	99274658	0.3392
Peak272	chr12	3207092	3207293	0.33872
Peak1714	chrX	152082080	152082199	0.33684
Peak586	chr17	79109588	79109871	0.33446
Peak746	chr2	75062467	75062567	0.32937
Peak280	chr12	6602804	6603002	0.32702
Peak1011	chr4	323732	323832	0.32657
Peak1400	chr7	44013471	44013591	0.32506
Peak641	chr19	2215907	2216198	0.31974
Peak178	chr10	87777690	87777864	0.31773
Peak423	chr14	52512488	52512706	0.31015
Peak268	chr12	2905037	2905137	0.30803
Peak1334	chr6	149093168	149093388	0.30729
Peak1443	chr8	22246952	22247136	0.30715
Peak345	chr12	117299234	117299526	0.30441
Peak1551	chr9	13971929	13972146	0.30392
Peak507	chr16	70818748	70818971	0.30353
Peak1119	chr4	184264251	184264351	0.30288
Peak1666	chrX	73702672	73703063	0.30285
Peak1042	chr4	38073553	38073826	0.30232
Peak427	chr14	54560828	54561157	0.30005
Peak804	chr2	197098622	197098844	0.29894
Peak1150	chr5	56738490	56738760	0.29613
Peak627	chr18	60845817	60846111	0.29307
Peak1403	chr7	47078276	47078485	0.29291
Peak162	chr10	45390862	45391016	0.2922
Peak424	chr14	53693394	53693624	0.28774
Peak251	chr11	113818816	113818916	0.28641
Peak1612	chr9	123995099	123995317	0.28525
Peak1704	chrX	149289646	149290040	0.28345
Peak542	chr17	10025783	10025976	0.28143
Peak755	chr2	109790695	109790900	0.28142
Peak1395	chr7	38392927	38393027	0.28082
Peak1041	chr4	36510128	36510289	0.28074
Peak1045	chr4	38754067	38754445	0.27759
Peak26	chr1	42230792	42231045	0.27713
Peak296	chr12	12987409	12987736	0.27635
Peak355	chr12	133127247	133127440	0.27375
Peak1360	chr6	167624562	167624845	0.27277
Peak430	chr14	69186519	69186770	0.27199
Peak1581	chr9	76953823	76954136	0.27074
Peak528	chr16	89804032	89804132	0.26896
Peak792	chr2	173172533	173172772	0.26811
Peak570	chr17	74815672	74815915	0.26656
Peak794	chr2	177381057	177381211	0.26634
Peak472	chr15	83501559	83501807	0.26615
Peak1562	chr9	38225465	38225709	0.26364
Peak377	chr13	44992058	44992264	0.26356
Peak201	chr10	132619435	132619652	0.26193
Peak1499	chr8	101814766	101814990	0.25966
Peak432	chr14	96468289	96468568	0.25962
Peak1546	chr9	3952751	3952990	0.259
Peak1544	chr9	3850188	3850407	0.25872
Peak1291	chr6	107096575	107096778	0.25868
Peak1188	chr5	123789477	123789718	0.25499
Peak92	chr1	183009333	183009533	0.25376
Peak228	chr11	58414726	58414976	0.25376
Peak509	chr16	74555678	74555891	0.24977
Peak1380	chr7	11738001	11738254	0.24891
Peak1628	chr9	140639950	140640170	0.24737
Peak186	chr10	100080686	100081001	0.24486
Peak565	chr17	66255285	66255398	0.24237
Peak8	chr1	3647092	3647288	0.24221
Peak1005	chr3	182966935	182967035	0.23811
Peak990	chr3	156143505	156143751	0.23797
Peak1126	chr5	2538543	2538789	0.23703
Peak1007	chr3	194836187	194836432	0.23685
Peak576	chr17	76409425	76409623	0.23607
Peak1314	chr6	119468629	119468833	0.23602
Peak895	chr21	48005555	48005944	0.23591
Peak843	chr20	22212405	22212561	0.23452
Peak991	chr3	156888721	156888934	0.22916
Peak438	chr14	106774969	106775283	0.22846
Peak725	chr2	29223541	29223641	0.22779
Peak695	chr2	3418279	3418498	0.22679
Peak1369	chr7	1372730	1372981	0.22523
Peak1276	chr6	106089462	106089652	0.22244
Peak1527	chr8	140789400	140789660	0.22045
Peak494	chr16	15644997	15645186	0.21612
Peak101	chr1	201110328	201110599	0.21608
Peak258	chr12	861793	861935	0.21523
Peak1016	chr4	6260575	6260775	0.215
Peak972	chr3	137846547	137846741	0.21398
Peak1438	chr8	19296033	19296300	0.20886
Peak66	chr1	112291406	112291612	0.20766
Peak298	chr12	14844589	14844719	0.20709
Peak1179	chr5	102729210	102729442	0.20707
Peak1686	chrX	130369525	130369821	0.2027
Peak441	chr14	106812493	106812667	0.20141
Peak1075	chr4	109298219	109298465	0.20052
Peak339	chr12	94929537	94929726	0.19671
Peak442	chr14	106995793	106996050	0.19641
Peak1157	chr5	66299902	66300028	0.19579
Peak1095	chr4	139516433	139516599	0.19565
Peak1021	chr4	8046549	8046710	0.1948
Peak105	chr1	201680513	201680705	0.19336
Peak1215	chr5	157863834	157863934	0.1921
Peak611	chr18	42182915	42183188	0.19168
Peak1230	chr6	3349194	3349339	0.19119
Peak851	chr20	30873630	30873794	0.19019
Peak196	chr10	118025366	118025549	0.18947
Peak398	chr13	89589657	89589882	0.18883
Peak1684	chrX	129968235	129968510	0.18804
Peak412	chr13	111695995	111696217	0.18778
Peak9	chr1	3692027	3692269	0.18641
Peak1605	chr9	111407871	111408089	0.18623
Peak580	chr17	78587335	78587466	0.18432
Peak1637	chrX	10204464	10204675	0.18165
Peak819	chr2	240220172	240220358	0.17859
Peak874	chr20	60849743	60849958	0.17566
Peak635	chr18	77615075	77615310	0.17565
Peak1311	chr6	114076831	114077112	0.17546
Peak543	chr17	14508625	14508837	0.1725
Peak491	chr16	10772610	10772768	0.17055
Peak214	chr11	15529587	15529715	0.17009
Peak311	chr12	40620105	40620423	0.16944
Peak1109	chr4	157118353	157118507	0.16928
Peak872	chr20	50575693	50575928	0.16849
Peak293	chr12	7046629	7046729	0.16793
Peak497	chr16	28923968	28924191	0.16722
Peak1105	chr4	152639178	152639430	0.16635
Peak594	chr18	3639344	3639496	0.16469
Peak13	chr1	11901355	11901669	0.16295
Peak206	chr11	10764453	10764644	0.16148
Peak929	chr3	8996727	8997085	0.16034
Peak1243	chr6	26565702	26565944	0.15767
Peak1195	chr5	131541544	131541708	0.15689
Peak532	chr17	700730	700913	0.15354
Peak907	chr22	24201549	24201705	0.15332
Peak504	chr16	65901630	65901792	0.15316
Peak1462	chr8	55984349	55984669	0.15247
Peak1401	chr7	44013627	44013753	0.14926
Peak1229	chr6	2127723	2127960	0.14637
Peak61	chr1	89954699	89954932	0.14527
Peak921	chr22	50578189	50578486	0.14499
Peak624	chr18	57549403	57549706	0.14446
Peak168	chr10	53981810	53981982	0.14342
Peak1543	chr9	3809811	3810079	0.1433
Peak458	chr15	66437971	66438251	0.14185
Peak1661	chrX	73137157	73137406	0.14081
Peak1683	chrX	129226184	129226354	0.1391
Peak1402	chr7	45365111	45365211	0.13839
Peak585	chr17	78866304	78866404	0.13713
Peak1328	chr6	137424212	137424424	0.13613
Peak342	chr12	94957155	94957421	0.13546
Peak1178	chr5	100163243	100163458	0.13517
Peak283	chr12	6715586	6715990	0.13379
Peak323	chr12	68989120	68989303	0.13337
Peak1449	chr8	33455041	33455402	0.13187
Peak199	chr10	132099802	132099902	0.13043
Peak1047	chr4	41648935	41649164	0.12991
Peak583	chr17	78864693	78864996	0.12683
Peak350	chr12	125012577	125012761	0.1268
Peak1338	chr6	150525894	150526092	0.12456
Peak1177	chr5	96528659	96528918	0.12432
Peak1118	chr4	184263993	184264202	0.12415
Peak353	chr12	132337070	132337263	0.12369
Peak1498	chr8	101512336	101512551	0.12349
Peak853	chr20	32366401	32366674	0.12332
Peak68	chr1	120165070	120165268	0.12316
Peak287	chr12	6981434	6981731	0.12244
Peak656	chr19	9785543	9785789	0.1219
Peak1345	chr6	159192297	159192517	0.12122
Peak1246	chr6	36067567	36067961	0.1212
Peak119	chr1	229506517	229506704	0.11864
Peak166	chr10	49842481	49842646	0.11739
Peak122	chr1	231859875	231860169	0.11696
Peak816	chr2	236443317	236443554	0.11599
Peak489	chr16	8735107	8735313	0.11489
Peak669	chr19	36259208	36259308	0.11289
Peak859	chr20	36597339	36597619	0.1126
Peak477	chr15	99709240	99709426	0.11246
Peak372	chr13	37123994	37124206	0.11092
Peak1488	chr8	81079613	81079893	0.11021
Peak1523	chr8	131442075	131442400	0.10921
Peak1717	chrX	152840293	152840429	0.10887
Peak930	chr3	9210068	9210268	0.10628
Peak440	chr14	106811863	106812041	0.10612
Peak582	chr17	78864163	78864263	0.10547
Peak1348	chr6	160257817	160258069	0.10512
Peak563	chr17	64490153	64490370	0.10378
Peak839	chr20	16535375	16535538	0.10253
Peak856	chr20	34099557	34099710	0.10237
Peak674	chr19	36980529	36980785	0.10052
Peak1258	chr6	52217290	52217472	0.10002
Peak1435	chr8	8096124	8096403	0.097355
Peak958	chr3	73427450	73427702	0.097317
Peak292	chr12	7046336	7046529	0.093106
Peak1048	chr4	41649491	41649665	0.091381
Peak449	chr15	45122967	45123206	0.091119
Peak43	chr1	64179964	64180183	0.090989
Peak844	chr20	22213224	22213412	0.090358
Peak567	chr17	71007364	71007549	0.089595
Peak137	chr10	504498	504716	0.087446
Peak384	chr13	53401693	53402220	0.086296
Peak96	chr1	199190603	199190832	0.085663
Peak232	chr11	71749142	71749393	0.085493
Peak14	chr1	11902314	11902565	0.085145
Peak212	chr11	15329187	15329404	0.080673
Peak1718	chrX	153009826	153010077	0.079206
Peak1372	chr7	6274105	6274377	0.079182
Peak1158	chr5	66300032	66300176	0.075542
Peak1645	chrX	37635815	37636077	0.073048
Peak1673	chrX	123342622	123342831	0.072268
Peak1055	chr4	42634807	42635054	0.071797
Peak847	chr20	25477562	25478036	0.071675
Peak470	chr15	81125138	81125360	0.071552
Peak1640	chrX	13782494	13782594	0.069624
Peak1682	chrX	129216824	129217082	0.068605
Peak925	chr22	51167900	51168079	0.065453
Peak481	chr16	1385444	1385661	0.064791
Peak758	chr2	128335636	128335885	0.06461
Peak1639	chrX	13781748	13782025	0.06351
Peak21	chr1	29456479	29456656	0.062482
Peak327	chr12	75832133	75832312	0.062395
Peak1104	chr4	151151796	151152046	0.06008
Peak1374	chr7	7310869	7311135	0.059051
Peak1124	chr5	1460347	1460695	0.058894
Peak879	chr20	62580812	62581128	0.056727
Peak167	chr10	53502994	53503255	0.056592
Peak1044	chr4	38087038	38087245	0.056066
Peak275	chr12	3601865	3601965	0.055709
Peak516	chr16	86611002	86611268	0.055001
Peak742	chr2	72169405	72169744	0.054959
Peak436	chr14	106773964	106774150	0.054882
Peak1022	chr4	8055916	8056133	0.051694
Peak935	chr3	16472813	16473017	0.051368
Peak12	chr1	6035722	6035945	0.050665
Peak496	chr16	24510720	24510927	0.050415
Peak556	chr17	43535514	43535726	0.050161
Peak1019	chr4	6290681	6290858	0.049943
Peak1432	chr7	158983987	158984247	0.049839
Peak256	chr12	860403	860618	0.049097
Peak683	chr19	51662060	51662160	0.048641
Peak1713	chrX	149577577	149577784	0.046034
Peak169	chr10	54226355	54226513	0.045324
Peak1413	chr7	71848281	71848559	0.043928
Peak838	chr20	15876439	15876697	0.043317
Peak1500	chr8	101913999	101914189	0.043013
Peak1724	chrX	153962792	153963011	0.042598
Peak1046	chr4	38787643	38787831	0.041492
Peak693	chr2	554598	554775	0.040492
Peak1387	chr7	18560092	18560559	0.037955
Peak153	chr10	19292263	19292499	0.037205
Peak69	chr1	120254499	120254681	0.031509
Peak845	chr20	23855422	23855643	0.030658
Peak732	chr2	42106527	42106721	0.030456
Peak1265	chr6	84761911	84762113	0.028516
Peak1540	chr8	146282730	146283073	0.028276
Peak1711	chrX	149493948	149494114	0.026987
Peak503	chr16	53883623	53883829	0.025822
Peak1518	chr8	126083768	126083962	0.025267
Peak926	chr3	4468447	4468800	0.02487
Peak1468	chr8	66209791	66209891	0.023864
Peak692	chr19	59074329	59074558	0.023003
Peak750	chr2	99402871	99403089	0.021133
Peak1715	chrX	152839358	152839560	0.019363
Peak938	chr3	34377355	34377544	0.017808
Peak439	chr14	106780342	106780476	0.016225
Peak894	chr21	47357769	47358140	0.015716
Peak967	chr3	126673984	126674207	0.015355
Peak865	chr20	43214202	43214486	0.014964
Peak841	chr20	18709239	18709587	0.014793
Peak763	chr2	129232200	129232509	0.014758
Peak968	chr3	127023149	127023393	0.013637
Peak1617	chr9	134388547	134388833	0.013476
Peak546	chr17	25728717	25728921	0.013186
Peak522	chr16	87669826	87670143	0.011393
Peak670	chr19	36294652	36294931	0.011225
Peak1198	chr5	133078467	133078663	0.01036
Peak625	chr18	60104680	60104939	0.0085324
Peak19	chr1	20669627	20669884	0.0081335
Peak330	chr12	77612102	77612332	0.0073141
Peak65	chr1	108087856	108088024	0.0068152
Peak205	chr11	2337739	2337941	0.0056857
Peak1451	chr8	35767263	35767363	0.0052552
Peak1442	chr8	21065088	21065334	0.0036703
Peak502	chr16	51219015	51219207	0.0030858
Peak1429	chr7	155754475	155754718	0.0025926
Peak825	chr20	3633954	3634286	0.0024159
Peak307	chr12	32703368	32703621	0.001832
Peak637	chr19	2076626	2076828	0.0010125
Peak347	chr12	122205682	122205867	0.00016047
