# Supplementary material for: Epigenomic profiling of glucocorticoid responses identifies cis-regulatory disruptions impacting steroid resistance in childhood acute lymphoblastic leukemia
Source: Leukemia. Author manuscript; Available in PMC 2022 Oct 4. (PMC9522591; doi:10.1038/s41375-022-01685-z)
Supplement: 1833642_Sup_Tab_8 [file NIHMS1833642-supplement-1833642_Sup_Tab_8.xlsx]

## Sheet: Supplementary Table 8
Supplementary Table 8. Top genes identified by integrative analysis
Cell line	Gene	HiChIP loop	STARR-seq	CpG Methylation	HGR sites (Distance to TSS)	RNA-seq 6hr log2FC	6hr FDR	RNA-seq 24hr log2FC	24hr FDR	GR occupancy site CRISPRi hits (Distance to TSS)	Gene analysis type	FDR
Nalm6	ADA	No	No	No overlapping CpG	Peak867 (+36264), Peak866 (+65247), Peak865 (+66039)	NA	NA	0.53949	7.8503e-05	Peak865 (+66039)	TAP	1.37e-10
Nalm6	BMP4	No	No	No overlapping CpG	Peak428 (-212798), Peak426 (+709108), Peak424 (+730020)	0.71776	5.2976e-05	1.2893	9.6513e-06	Peak427 (-137464), Peak424 (+730020)	CRISPR screen	1.57e-24
Nalm6	CCBE1	No	No	Yes (p<0.05)	Peak624 (-184943), Peak623 (-138778)	NA	NA	-0.89921	0.00172	Peak624 (-184943)	TAP	1.75e-10
697	DIP2A	No	No	No overlapping CpG	Peak895 (+126726)	0.52803	1.5586e-09	0.89923	6.3197e-13	Peak895 (+126726)	TAP	3.62e-14
Nalm6	DIP2A	No	No	No overlapping CpG	Peak895 (+126726)	0.68362	1.5255e-12	1.1317	1.2286e-06	Peak895 (+126726)	TAP	3.62e-14
697	FBXO15	No	No	No overlapping CpG	Peak631 (+193416), Peak630 (+285882)	1.5455	1.2658e-07	0.61283	0.020799	Peak633 (+185428), Peak631 (+193416)	CRISPR screen	2.2e-31
697	GRID1	No	No	No overlapping CpG	Peak180 (+347106), Peak179 (+347838), Peak178 (+348458)	1.0858	0.0076196	NA	NA	Peak180 (+347106)	CRISPR screen	6.75e-49
Nalm6	GRID1	No	No	Not significant	Peak180 (+347106), Peak178 (+348458)	-1.4035	0.0076787	-2.1389	0.0025453	Peak178 (+348458)	CRISPR screen	6.75e-49
697	GUCY2C	No	No	No overlapping CpG	Peak299 (-14543)	4.604	2.5234e-05	5.4161	1.0073e-06	Peak299 (-14543)	CRISPR screen	2.05e-39
Nalm6	IRF4	Yes	Yes	No overlapping CpG	Peak1228 (+122964)	0.59016	1.9544e-12	0.72055	3.7663e-05	Peak1228 (+122964)	GE LC50	1.13e-05
697	IRX2	No	No	No overlapping CpG	Peak1127 (+86845), Peak1126 (+213110), Peak1125 (+213892)	NA	NA	0.70358	9.108e-14	Peak1127 (+86845), Peak1125 (+213892)	CRISPR screen	2.34e-29
Nalm6	IRX2	No	No	No overlapping CpG	Peak1126 (+213110), Peak1125 (+213892)	1.4974	0.021053	NA	NA	Peak1126 (+213110)	CRISPR screen	2.34e-29
697	JPH1	No	No	Yes (p<0.05)	Peak1481 (+121981), Peak1478 (+122933), Peak1476 (+123472)	-0.41926	3.9925e-07	0.60235	4.2272e-09	Peak1481 (+121981), Peak1476 (+123472)	CRISPR screen	6.75e-49
697	LY96	No	No	Yes (p<0.05)	Peak1476 (+206504), Peak1478 (+207043), Peak1481 (+207995)	0.5877	0.00027127	1.3275	3.3388e-08	Peak1476 (+206504), Peak1481 (+207995)	CRISPR screen	6.75e-49
Nalm6	LY96	No	No	Yes (p<0.05)	Peak1476 (+206504), Peak1477 (+206893), Peak1478 (+207043), Peak1479 (+207608), Peak1481 (+207995)	0.52405	0.0026881	0.98622	0.00015224	Peak1478 (+207043)	CRISPR screen	6.75e-49
697	NOL4	No	No	Not significant	Peak608 (+350323), Peak607 (+350970), Peak606 (+351921), Peak605 (+369208), Peak604 (+371778), Peak603 (+373628), Peak602 (+413897)	0.79901	9.0937e-06	0.64716	0.00013888	Peak608 (+350323), Peak606 (+351921), Peak605 (+369208)	GE LC50	5.52e-07
697	NR3C1	No	No	Trend (p=0.10)	Peak1204 (+220114)	NA	NA	0.97874	7.4881e-14	Peak1204 (+220114), Peak1203 (+270010)	CRISPR screen	8.69e-74
Nalm6	PKIG	Yes	No	Not significant	Peak865 (+53794), Peak866 (+54586), Peak867 (+83569)	-0.45227	8.8273e-08	-0.92157	1.6155e-06	Peak865 (+53794)	TAP	6.68e-08
Nalm6	PMAIP1	Yes	No	Yes (p<0.05)	Peak623 (-63790), Peak624 (-17625)	-0.44502	4.7364e-10	-0.72718	3.2087e-06	Peak624 (-17625)	CRISPR screen	1.68e-51
697	PYROXD2	No	No	No overlapping CpG	Peak186 (+94097)	0.80862	1.8775e-11	0.65467	9.9656e-10	Peak186 (+94097)	CRISPR screen	7.38e-32
697	ROR1	Yes	Yes	Yes (p<0.05)	Peak42 (-70242), Peak43 (-59640), Peak44 (-134)	-0.61475	5.86e-09	-0.53506	7.3957e-07	Peak42 (-70242), Peak43 (-59640), Peak44 (-134), Peak45 (+646), Peak46 (+147780)	GE LC50	4.16e-06
Nalm6	S100B	Yes	No	No overlapping CpG	Peak895 (+19371)	2.5036	0.048189	NA	NA	Peak895 (+19371)	TAP	1.28e-14
697	SGK1	No	No	Trend (p=0.12)	Peak1327 (-199454), Peak1325 (-15621), Peak1324 (+29069), Peak1322 (+29982)	-1.1974	7.9097e-13	-2.0996	3.7377e-13	Peak1327 (-199454)	CRISPR screen	8.48e-30
697	SH3GL2	No	No	No overlapping CpG	Peak1555 (-362883), Peak1556 (-362336), Peak1557 (-361595)	1.7519	6.7838e-06	0.85863	0.029017	Peak1555 (-362883)	TAP	2.58e-05
Nalm6	SIPA1L2	No	No	Yes (p<0.05)	Peak122 (+837282)	0.72389	9.8801e-09	0.88126	2.4128e-05	Peak122 (+837282)	CRISPR screen	6.75e-49
697	SIPA1L2	No	No	Yes (p<0.05)	Peak123 (+836477), Peak122 (+837282)	-0.64958	1.5632e-05	-0.93418	1.0292e-05	Peak123 (+836477)	CRISPR screen	6.75e-49
Nalm6	SPRY1	No	No	Trend (p=0.11)	Peak1080 (+249580), Peak1081 (+249924), Peak1082 (+250132)	NA	NA	-0.98935	3.4189e-06	Peak1080 (+249580)	CRISPR screen	8.18e-49
697	STK3	No	No	Yes (p<0.05)	Peak1494 (+160938), Peak1493 (+161811)	0.33136	1.3964e-06	0.84355	2.2401e-12	Peak1494 (+160938), Peak1493 (+161811)	CRISPR screen	8.18e-49
697	TLE1	No	No	Yes (p<0.05)	Peak1585 (+315840), Peak1584 (+316253)	0.35972	3.8621e-08	NA	NA	Peak1585 (+315840)	CRISPR screen	2.09e-25
697	TNFRSF13B	No	No	Yes (p<0.05)	Peak545 (+1596)	NA	NA	-1.2793	0.00066384	Peak545 (+1596)	CRISPR screen	6.75e-49
697	TNRC6B	No	No	No overlapping CpG	Peak916 (+137685)	0.41085	5.5743e-08	0.50853	1.3472e-08	Peak916 (+137685)	CRISPR screen	5.45e-36
